# Supplementary material for: Morphometric characterization and temporal temperature measurements during hepatic microwave ablation in swine
Source: PLoS One. 2023 Aug 4;18(8):e0289674. doi: 10.1371/journal.pone.0289674 (PMC10403086; doi:10.1371/journal.pone.0289674)
Supplement: S1 Table — (XLSX) [file pone.0289674.s001.xlsx]

## Sheet: Fig2
	Average area (mm^2) of ex vivo bench models and in vivo swine subjects for 40W and 90W 10 minute microwave ablations
	Study	Power/Subject	Measurement number				Summary statistics			Study	Power/Subject	Measurement number						Summary statistics
		40 W	1	2	3	4	Mean	SD			90 W	1	2	3	4	5	6	Mean	SD
	TMTCP		261.529	272.359	288.746	269.675	273.077	11.4155		TMTCP		476.452	476.645	433.552	417.9			451.137	30.0302
	ex vivo bovine liver		504.914	487.502	625.998	591.627	552.51	66.8881		ex vivo bovine liver		1248.42	1104.47	768.415	876.946	1271.57	1431.14	1116.83	252.642
	in vivo gross pathology (2D)	Subject 1	316.231	291.142	347.306	272.687	314.837	119.403		in vivo gross pathology (2D)	Subject 4	721.089	962.576	1288.88	1354.21	1205.58	1273.56	912.361	298.041
		Subject 2(a)	501.172	284.824	521.959	284.288					Subject 5	941.876	988.2	795.743	584.691	1034.01
		Subject 3	174.195	154.57							Subject 2(b)	578.525	478.946	565.177
	in vivo segmentation plane (3D)		440.818	245.894	584.156		423.623	169.785		in vivo segmentation plane (3D)		1285.24	503.457	1588.57				1125.76	559.861
	Average area (mm^2) of in vivo gross pathology zones for 40W and 90W 10 minute microwave ablations
	Zone	Power/Subject	Measurement number				Summary statistics			Zone	Power/Subject	Measurement number						Summary statistics
		40 W	1	2	3	4	Mean	SD			90 W	1	2	3	4	5	6	Mean	SD
	(i) central nercrosis	Subject 1	144.177	152.484	105.575	107.747	135.552	98.9058		(i) central nercrosis	Subject 4	169.922	214.088	310.01	425.213	249.12	417.323	342.667	180.657
		Subject 2(a)	295.673	91.529	316.662	85.686					Subject 5	538.904	509.552	589.658	337.118	645.344
		Subject 3	26.177	29.81							Subject 2(b)	115.353	161.739	113.999
	(ii) irreversible damage	Subject 1	224.459	212.942	232.648	193.18	246.501	120.995		(ii) irreversible damage	Subject 4	421.003	639.499	919.881	855.818	821.277	985.841	658.702	238.936
		Subject 2(a)	447.508	221.882	475.672	220.007					Subject 5	781.062	786.031	733.533	462.135	838.394
		Subject 3	122.663	114.045							Subject 2(b)	376.934	318.156	282.259
	(iii) hemorrhagic halo	Subject 1	316.231	291.142	347.306	272.687	314.837	119.403		(iii) hemorrhagic halo	Subject 4	721.089	962.576	1288.88	1354.21	1205.58	1273.56	912.361	298.041
		Subject 2(a)	501.172	284.824	521.959	284.288					Subject 5	941.876	988.2	795.743	584.691	1034.01
		Subject 3	174.195	154.57							Subject 2(b)	578.525	478.946	565.177
	Comparision of morphometrics (solidity, unitless) for ex vivo bench and in vivo studies for 40W and 90W 10 minute microwave ablations
	Study subject	Power/Subject	Measurement number				Summary statistics			Study subject	Power/Subject	Measurement number						Summary statistics
		40 W	1	2	3	4	Mean	SD			90 W	1	2	3	4	5	6	Mean	SD
	TMTCP		1	1			1	0		TMTCP		0.989	0.994					0.9915	0.00353553
	ex vivo bovine liver		0.942	0.883	0.966	1	0.94775	0.0492908		ex vivo bovine liver		0.997	0.982	0.978	1			0.98925	0.0108743
	in vivo gross pathology (2D)	Subject 1	0.932	0.938	0.989	0.936	0.956875	0.0512319		in vivo gross pathology (2D)	Subject 4	0.993	0.962	0.957	0.96	0.997	0.989	0.971214	0.0304484
		Subject 2(a)	0.988	0.849	0.987	0.873					Subject 5	0.993	0.986	0.99	0.992	0.996
		Subject 3	0.99	0.982			0.9464	0.0512319			Subject 2(b)	0.966	0.902	0.914				0.971214	0.0304484
	in vivo imaging (3D)		0.870213	0.885513	0.843694		0.866473	0.021159		in vivo imaging (3D)		0.85079	0.823505	0.583356				0.75255	0.14716
	Volumetric (mm^3) measurments of segmented ablation zones in 3D for 40W and 90W 10 minute microwave ablations
	Study	Power	Subject				Summary statistics			Study	Power	Subject						Summary statistics
		40 W	1	2(a)	3		Mean	SD			90 W	4	5	2(b)				Mean	SD
	in vivo imaging (3D)		10064.8	4881.31	14482		9809.37	4805.44		in vivo imaging (3D)		53308.3	13114.4	96408.9				54277.2	41655.7
	*Subject 2 had both a 40W (a), and 90W (b) ablation

## Sheet: Fig4(A)
	Temperature mesurments in TMTCP during 40W 10 minute microwave ablation
	Thermocouple Measurements							Ablation Probe Measurements
	Device Name:	OctTCTemp2000V2						Probe type:	LK 15
	Device Description:	Eight Channel Thermocouple Temperature Data Logger with Display						Probe settings:	40W, 10min, Liver
	Device ID:	MultiChannel
		Channel 2	Channel 4	Channel 6	Channel 8	Channel 10
	Normalized Time	Thermocouple 1 (°C)	Thermocouple 2 (°C)	Thermocouple 3 (°C)	Thermocouple 4 (°C)	Thermocouple 5 (°C)		Normalized Time	Temperature (°C)
	0	35.2	36.4	34.2	34.1	36.3		-5.78704e-05	32
	1.15741e-05	35.2	37	34.3	34.7	36.4		-4.62963e-05	32
	2.31481e-05	35.3	37.4	34.4	35.4	36.5		-3.47222e-05	32
	3.47222e-05	35.3	37.7	34.4	36	36.5		-2.31481e-05	32
	4.62963e-05	35.3	37.9	34.5	36.6	36.6		-1.15741e-05	32
	5.78704e-05	35.4	38.2	34.5	37.3	36.6		0	32
	6.94444e-05	35.4	38.4	34.5	38	36.7		0	32
	9.25926e-05	35.5	38.6	34.6	38.9	36.7		1.15741e-05	39
	0.000104167	35.5	38.9	34.7	39.7	36.7		2.31481e-05	58
	0.000115741	35.5	39	34.7	40.4	36.8		3.47222e-05	64
	0.000127315	35.6	39.3	34.8	41.3	36.8		4.62963e-05	68
	0.000138889	35.6	39.5	34.9	42	36.8		5.78704e-05	72
	0.000150463	35.6	39.7	34.9	42.6	36.8		6.94444e-05	74
	0.000162037	35.7	39.9	34.9	43.5	36.8		8.10185e-05	77
	0.000173611	35.7	40	35	44.2	36.8		9.25926e-05	79
	0.000185185	35.7	40.3	35.1	44.9	36.8		0.000104167	81
	0.000196759	35.8	40.4	35.1	45.5	36.9		0.000115741	83
	0.000208333	35.8	40.6	35.2	46.2	36.9		0.000127315	85
	0.000219907	35.8	40.7	35.3	46.9	36.9		0.000138889	86
	0.000231481	35.8	41	35.4	47.6	36.9		0.000150463	88
	0.000243056	35.9	41.1	35.4	48.2	36.9		0.000162037	89
	0.00025463	35.9	41.2	35.5	48.8	36.9		0.000173611	91
	0.000266204	35.9	41.4	35.6	49.4	36.9		0.000185185	92
	0.000277778	36	41.5	35.7	50	36.9		0.000196759	93
	0.000289352	36	41.7	35.7	50.7	36.9		0.000208333	94
	0.000300926	36.1	41.8	35.8	51.3	37		0.000219907	95
	0.0003125	36.1	42	35.9	51.8	37		0.000231481	96
	0.000324074	36.1	42.1	36	52.4	37		0.000243056	97
	0.000335648	36.2	42.2	36	52.9	37		0.00025463	98
	0.000358796	36.2	42.4	36.1	53.6	37		0.000266204	99
	0.000381944	36.2	42.7	36.3	54.6	37		0.000277778	99
	0.000393519	36.3	42.8	36.3	55.3	37		0.000289352	100
	0.000405093	36.3	43	36.5	55.7	37		0.000300926	101
	0.000416667	36.4	43.1	36.6	56.5	37		0.0003125	102
	0.000428241	36.4	43.3	36.6	57	37		0.000324074	103
	0.000439815	36.4	43.4	36.7	57.5	37		0.000335648	103
	0.000451389	36.5	43.4	36.8	58	37.1		0.000347222	104
	0.000462963	36.5	43.5	36.9	58.6	37.1		0.000358796	105
	0.000474537	36.6	43.7	37	59.1	37.1		0.00037037	105
	0.000486111	36.6	43.7	37	59.6	37.1		0.000381944	106
	0.000497685	36.6	43.9	37.1	60.3	37.1		0.000393519	106
	0.000520833	36.7	44.1	37.3	61.2	37.1		0.000405093	107
	0.000532407	36.8	44.2	37.4	61.7	37.1		0.000416667	107
	0.000543981	36.8	44.3	37.4	62.2	37.2		0.000428241	108
	0.000555556	36.8	44.4	37.6	62.7	37.1		0.000439815	108
	0.000578704	36.8	44.6	37.6	63.2	37.2		0.000451389	108
	0.000590278	36.9	44.7	37.7	63.7	37.2		0.000462963	109
	0.000601852	36.9	44.7	37.8	64.1	37.2		0.000474537	109
	0.000613426	37	44.8	37.9	64.6	37.2		0.000486111	109
	0.000625	37	44.9	38	65.1	37.2		0.000497685	110
	0.000636574	37	45	38.1	65.7	37.2		0.000509259	110
	0.000648148	37.1	45.1	38.2	66.1	37.2		0.000520833	110
	0.000659722	37.1	45.2	38.3	66.6	37.2		0.000532407	110
	0.000671296	37.1	45.3	38.3	67	37.2		0.000543981	111
	0.00068287	37.2	45.4	38.4	67.5	37.2		0.000555556	111
	0.000694444	37.2	45.5	38.5	67.9	37.3		0.00056713	112
	0.000717593	37.3	45.6	38.6	68.3	37.3		0.000578704	112
	0.000729167	37.3	45.7	38.7	69	37.3		0.000590278	112
	0.000752315	37.4	45.8	38.9	69.5	37.3		0.000601852	113
	0.000763889	37.4	45.9	39	70	37.3		0.000613426	113
	0.000775463	37.5	46	39.1	70.5	37.3		0.000625	113
	0.000787037	37.5	46.1	39.2	70.8	37.3		0.000636574	114
	0.000810185	37.5	46.2	39.3	71.2	37.3		0.000648148	114
	0.000821759	37.6	46.3	39.3	71.5	37.3		0.000659722	115
	0.000833333	37.6	46.4	39.4	71.8	37.4		0.000671296	115
	0.000844907	37.6	46.5	39.6	72.3	37.4		0.00068287	115
	0.000856481	37.7	46.6	39.6	72.6	37.4		0.000694444	115
	0.000868056	37.7	46.7	39.7	72.9	37.4		0.000706019	115
	0.00087963	37.8	46.8	39.8	73.3	37.4		0.000717593	116
	0.000891204	37.8	46.9	39.9	73.5	37.4		0.000729167	116
	0.000902778	37.8	47	40	73.9	37.4		0.000740741	116
	0.000914352	37.9	47.1	40	74.2	37.4		0.000752315	116
	0.0009375	37.9	47.2	40.2	74.5	37.4		0.000763889	116
	0.000949074	38	47.3	40.2	74.8	37.4		0.000775463	116
	0.000960648	38	47.3	40.3	75.1	37.5		0.000787037	116
	0.000972222	38	47.5	40.4	75.5	37.5		0.000798611	116
	0.000983796	38	47.6	40.5	75.7	37.5		0.000810185	116
	0.00099537	38.1	47.6	40.5	76	37.5		0.000821759	116
	0.00100694	38.1	47.8	40.6	76.5	37.5		0.000833333	116
	0.00101852	38.2	47.9	40.8	76.7	37.5		0.000844907	117
	0.00103009	38.2	48	40.8	77	37.5		0.000856481	117
	0.00104167	38.3	48.1	40.9	77.2	37.5		0.000868056	117
	0.00106481	38.3	48.2	41	77.6	37.6		0.00087963	117
	0.00107639	38.4	48.3	41.1	77.8	37.6		0.000891204	117
	0.00108796	38.4	48.5	41.1	78.2	37.6		0.000902778	117
	0.00109954	38.4	48.5	41.2	78.4	37.6		0.000914352	117
	0.00111111	38.5	48.6	41.3	78.7	37.6		0.000925926	117
	0.00112269	38.5	48.7	41.4	78.9	37.6		0.0009375	118
	0.00113426	38.5	48.8	41.4	79.2	37.7		0.000949074	118
	0.00114583	38.5	48.9	41.5	79.4	37.7		0.000960648	118
	0.00115741	38.6	49	41.6	79.7	37.6		0.000972222	118
	0.00118056	38.6	49.1	41.7	80	37.7		0.000983796	119
	0.00119213	38.7	49.1	41.8	80.1	37.7		0.00099537	119
	0.0012037	38.7	49.2	41.8	80.4	37.7		0.00100694	119
	0.00121528	38.8	49.4	41.9	80.6	37.7		0.00101852	119
	0.00122685	38.8	49.5	42	80.8	37.7		0.00103009	119
	0.00123843	38.8	49.5	42.1	81.1	37.7		0.00104167	120
	0.00125	38.9	49.6	42.2	81.3	37.7		0.00105324	120
	0.00126157	38.9	49.7	42.2	81.4	37.8		0.00106481	120
	0.00127315	38.9	49.7	42.3	81.7	37.8		0.00107639	120
	0.00128472	39	49.8	42.4	81.9	37.8		0.00108796	120
	0.0012963	39	49.8	42.5	82.1	37.8		0.00109954	121
	0.00130787	39.1	49.9	42.6	82.2	37.8		0.00111111	121
	0.00131944	39.1	49.9	42.6	82.4	37.8		0.00112269	121
	0.00133102	39.1	50	42.7	82.6	37.9		0.00113426	121
	0.00134259	39.2	50.1	42.7	82.8	37.9		0.00114583	121
	0.00136574	39.2	50.1	42.9	83	37.9		0.00115741	122
	0.00137731	39.2	50.2	42.9	83.2	37.9		0.00116898	122
	0.00138889	39.3	50.2	43	83.3	37.9		0.00118056	122
	0.00140046	39.3	50.3	43.1	83.5	37.9		0.00119213	122
	0.00141204	39.3	50.4	43.1	83.8	37.9		0.0012037	123
	0.00142361	39.4	50.5	43.2	83.9	38		0.00121528	123
	0.00143519	39.4	50.6	43.2	84.1	38		0.00122685	123
	0.00144676	39.4	50.6	43.3	84.4	38		0.00123843	123
	0.00145833	39.5	50.7	43.4	84.5	38		0.00125	124
	0.00146991	39.5	50.8	43.5	84.7	38		0.00126157	124
	0.00148148	39.6	50.8	43.6	84.9	38		0.00127315	124
	0.00149306	39.6	50.9	43.7	85.1	38.1		0.00128472	124
	0.0015162	39.7	51	43.7	85.3	38.1		0.0012963	124
	0.00152778	39.6	51	43.8	85.5	38.1		0.00130787	124
	0.00153935	39.7	51.1	43.9	85.7	38.1		0.00131944	124
	0.00155093	39.7	51.1	43.9	85.9	38.1		0.00133102	124
	0.0015625	39.8	51.2	44	86	38.1		0.00134259	124
	0.00157407	39.8	51.3	44	86.2	38.1		0.00135417	124
	0.00158565	39.8	51.4	44.1	86.3	38.2		0.00136574	125
	0.00159722	39.9	51.5	44.2	86.4	38.2		0.00137731	125
	0.0016088	39.9	51.5	44.2	86.5	38.2		0.00138889	125
	0.00162037	40	51.6	44.3	86.7	38.2		0.00140046	125
	0.00163194	40	51.7	44.4	86.9	38.2		0.00141204	125
	0.00164352	40	51.7	44.4	87	38.2		0.00142361	125
	0.00165509	40.1	51.8	44.5	87.1	38.2		0.00143519	125
	0.00166667	40.1	51.9	44.6	87.3	38.3		0.00144676	126
	0.00168981	40.1	52	44.7	87.3	38.3		0.00145833	126
	0.00170139	40.2	52	44.7	87.5	38.3		0.00146991	126
	0.00171296	40.2	52.1	44.8	87.6	38.3		0.00148148	126
	0.00172454	40.3	52.2	44.9	87.6	38.3		0.00149306	126
	0.00173611	40.3	52.3	44.9	87.7	38.3		0.00150463	126
	0.00174769	40.3	52.3	45	87.9	38.4		0.0015162	126
	0.00175926	40.3	52.4	45.1	88	38.3		0.00152778	126
	0.00177083	40.4	52.5	45.1	88.1	38.4		0.00153935	126
	0.00178241	40.4	52.6	45.2	88.2	38.4		0.00155093	126
	0.00179398	40.5	52.6	45.2	88.3	38.4		0.0015625	126
	0.00180556	40.5	52.7	45.3	88.4	38.4		0.00157407	127
	0.00181713	40.5	52.6	45.4	88.5	38.5		0.00158565	127
	0.00184028	40.6	52.7	45.5	88.7	38.5		0.00159722	127
	0.00185185	40.6	52.7	45.5	88.8	38.5		0.0016088	127
	0.00186343	40.6	52.8	45.6	88.9	38.6		0.00162037	127
	0.001875	40.7	52.9	45.7	89.1	38.6		0.00163194	127
	0.00188657	40.7	52.9	45.8	89.3	38.7		0.00164352	127
	0.00189815	40.7	52.9	45.8	89.5	38.6		0.00165509	127
	0.00190972	40.8	53	45.9	89.7	38.7		0.00166667	127
	0.0019213	40.8	53.1	45.9	89.8	38.7		0.00167824	127
	0.00193287	40.8	53.2	46	89.9	38.7		0.00168981	127
	0.00195602	40.9	53.2	46.1	90	38.7		0.00170139	127
	0.00196759	41	53.3	46.1	90.2	38.8		0.00171296	127
	0.00197917	41	53.4	46.2	90.4	38.8		0.00172454	127
	0.00200231	41	53.5	46.3	90.5	38.8		0.00173611	127
	0.00201389	41.1	53.5	46.4	90.7	38.8		0.00174769	128
	0.00202546	41.1	53.6	46.4	90.7	38.8		0.00175926	128
	0.00203704	41.2	53.7	46.5	90.6	38.8		0.00177083	128
	0.00204861	41.2	53.7	46.5	90.8	38.8		0.00178241	128
	0.00206019	41.2	53.8	46.6	91	38.9		0.00179398	128
	0.00207176	41.3	53.8	46.7	91.1	38.9		0.00180556	128
	0.00208333	41.3	53.9	46.7	91.2	38.9		0.00181713	128
	0.00209491	41.3	54	46.8	91.3	38.9		0.0018287	128
	0.00210648	41.4	54	46.8	91.4	38.9		0.00184028	127
	0.00211806	41.4	54.1	46.9	91.5	39		0.00185185	128
	0.00212963	41.4	54.2	47	91.5	38.9		0.00186343	128
	0.00215278	41.4	54.3	47	91.6	39		0.001875	128
	0.00216435	41.5	54.3	47	91.7	39		0.00188657	128
	0.00217593	41.5	54.4	47.2	91.8	39		0.00189815	128
	0.0021875	41.5	54.5	47.2	91.8	39		0.00190972	128
	0.00219907	41.6	54.5	47.3	91.8	39		0.0019213	128
	0.00221065	41.6	54.6	47.3	91.9	39		0.00193287	128
	0.00222222	41.7	54.7	47.4	91.9	39		0.00194444	128
	0.0022338	41.7	54.7	47.5	92	39		0.00195602	128
	0.00224537	41.7	54.8	47.5	92	39.1		0.00196759	128
	0.00226852	41.8	54.9	47.5	92.1	39.1		0.00197917	128
	0.00228009	41.8	54.9	47.6	92.1	39.1		0.00199074	128
	0.00229167	41.9	55	47.6	92.2	39.1		0.00200231	128
	0.00230324	41.9	55	47.7	92.2	39.1		0.00201389	129
	0.00231481	41.9	55.1	47.8	92.2	39.2		0.00202546	128
	0.00232639	42	55.1	47.9	92.3	39.2		0.00203704	128
	0.00233796	42	55.2	47.9	92.2	39.2		0.00204861	129
	0.00234954	42	55.2	48	92.3	39.2		0.00206019	129
	0.00236111	42.1	55.3	48	92.3	39.2		0.00207176	129
	0.00237269	42.1	55.4	48.1	92.4	39.2		0.00208333	129
	0.00238426	42.1	55.4	48.1	92.4	39.2		0.00209491	129
	0.00239583	42.2	55.5	48.2	92.4	39.2		0.00210648	129
	0.00240741	42.2	55.6	48.2	92.5	39.2		0.00211806	129
	0.00241898	42.2	55.6	48.2	92.5	39.2		0.00212963	129
	0.00243056	42.2	55.6	48.3	92.6	39.3		0.0021412	129
	0.0024537	42.3	55.7	48.4	92.6	39.3		0.00215278	129
	0.00246528	42.4	55.8	48.5	92.6	39.3		0.00216435	129
	0.00248843	42.4	55.9	48.5	92.7	39.3		0.00217593	128
	0.0025	42.4	55.9	48.6	92.7	39.3		0.0021875	129
	0.00251157	42.5	55.9	48.6	92.8	39.3		0.00219907	129
	0.00252315	42.5	56	48.7	92.8	39.3		0.00221065	129
	0.00253472	42.5	56	48.7	92.8	39.3		0.00222222	129
	0.0025463	42.6	56.1	48.8	92.9	39.3		0.0022338	129
	0.00255787	42.6	56.1	48.8	92.9	39.3		0.00224537	129
	0.00256944	42.6	56.2	48.8	92.9	39.3		0.00225694	129
	0.00258102	42.6	56.2	48.9	93	39.3		0.00226852	129
	0.00259259	42.7	56.3	49	92.9	39.3		0.00228009	129
	0.00260417	42.7	56.3	49.1	93	39.4		0.00229167	129
	0.00261574	42.8	56.3	49.1	93	39.4		0.00230324	129
	0.00262731	42.8	56.4	49.1	93.1	39.4		0.00231481	129
	0.00263889	42.8	56.4	49.2	93.1	39.4		0.00232639	129
	0.00265046	42.8	56.5	49.2	93.1	39.4		0.00233796	129
	0.00266204	42.8	56.6	49.2	93.1	39.4		0.00234954	129
	0.00267361	42.9	56.7	49.3	93.2	39.4		0.00236111	129
	0.00268519	43	56.7	49.4	93.3	39.4		0.00237269	129
	0.00269676	43	56.8	49.3	93.3	39.5		0.00238426	129
	0.00271991	43	56.9	49.4	93.3	39.5		0.00239583	129
	0.00273148	43.1	56.9	49.5	93.4	39.4		0.00240741	129
	0.00274306	43.1	57	49.5	93.4	39.5		0.00241898	129
	0.00275463	43.1	57	49.6	93.4	39.5		0.00243056	129
	0.0027662	43.2	57.1	49.6	93.5	39.5		0.00244213	129
	0.00277778	43.2	57.1	49.7	93.5	39.5		0.0024537	129
	0.00278935	43.2	57.2	49.7	93.5	39.5		0.00246528	129
	0.00280093	43.2	57.2	49.8	93.6	39.5		0.00247685	129
	0.0028125	43.3	57.3	49.8	93.6	39.5		0.00248843	129
	0.00282407	43.3	57.3	49.9	93.7	39.6		0.0025	129
	0.00283565	43.4	57.3	49.9	93.7	39.5		0.00251157	129
	0.00284722	43.4	57.4	49.9	93.8	39.6		0.00252315	129
	0.0028588	43.4	57.4	49.9	93.8	39.5		0.00253472	129
	0.00287037	43.4	57.5	50	93.9	39.6		0.0025463	129
	0.00288194	43.5	57.5	50	94	39.6		0.00255787	129
	0.00289352	43.5	57.5	50.1	94	39.6		0.00256944	129
	0.00290509	43.5	57.6	50.1	94	39.6		0.00258102	129
	0.00291667	43.6	57.7	50.2	94.1	39.6		0.00259259	129
	0.00292824	43.6	57.7	50.2	94.2	39.6		0.00260417	129
	0.00293981	43.6	57.8	50.3	94.3	39.6		0.00261574	129
	0.00296296	43.6	57.8	50.3	94.3	39.6		0.00262731	129
	0.00297454	43.7	57.9	50.3	94.3	39.7		0.00263889	129
	0.00298611	43.7	57.9	50.4	94.3	39.6		0.00265046	128
	0.00299769	43.7	57.9	50.4	94.4	39.7		0.00266204	128
	0.00300926	43.8	58	50.5	94.4	39.7		0.00267361	128
	0.00302083	43.8	58	50.6	94.3	39.7		0.00268519	128
	0.00303241	43.8	58.1	50.6	94.4	39.7		0.00269676	128
	0.00304398	43.8	58.1	50.7	94.4	39.7		0.00270833	129
	0.00305556	43.9	58.2	50.7	94.4	39.7		0.00271991	129
	0.00306713	43.9	58.2	50.7	94.4	39.7		0.00273148	129
	0.0030787	43.9	58.2	50.8	94.4	39.7		0.00274306	129
	0.00309028	44	58.3	50.8	94.5	39.7		0.00275463	129
	0.00311343	44	58.4	50.8	94.5	39.8		0.0027662	129
	0.003125	44.1	58.5	50.9	94.5	39.8		0.00277778	129
	0.00313657	44.1	58.6	50.8	94.5	39.8		0.00278935	129
	0.00314815	44.1	58.7	50.9	94.5	39.8		0.00280093	129
	0.00315972	44.1	58.7	51	94.5	39.8		0.0028125	129
	0.0031713	44.2	58.8	51.1	94.5	39.8		0.00282407	128
	0.00318287	44.2	58.9	51.1	94.5	39.8		0.00283565	128
	0.00319444	44.3	58.9	51.1	94.5	39.8		0.00284722	129
	0.00320602	44.2	59	51.2	94.5	39.8		0.0028588	129
	0.00321759	44.3	59.1	51.2	94.5	39.8		0.00287037	129
	0.00322917	44.3	59.1	51.2	94.5	39.8		0.00288194	129
	0.00324074	44.3	59.2	51.2	94.6	39.8		0.00289352	129
	0.00325231	44.4	59.2	51.3	94.5	39.8		0.00290509	129
	0.00326389	44.4	59.3	51.4	94.6	39.9		0.00291667	129
	0.00327546	44.4	59.3	51.4	94.5	39.9		0.00292824	129
	0.00329861	44.5	59.4	51.4	94.6	39.9		0.00293981	129
	0.00331019	44.5	59.4	51.4	94.6	39.9		0.00295139	129
	0.00332176	44.5	59.5	51.5	94.6	39.9		0.00296296	129
	0.00333333	44.6	59.5	51.5	94.6	39.9		0.00297454	129
	0.00334491	44.6	59.6	51.5	94.6	40		0.00298611	129
	0.00335648	44.6	59.6	51.6	94.6	40		0.00299769	129
	0.00336806	44.7	59.6	51.6	94.7	40		0.00300926	129
	0.00337963	44.7	59.7	51.7	94.7	40		0.00302083	129
	0.0033912	44.7	59.7	51.7	94.7	40		0.00303241	128
	0.00340278	44.7	59.8	51.8	94.8	40		0.00304398	129
	0.00341435	44.8	59.8	51.8	94.8	40		0.00305556	129
	0.0034375	44.8	59.9	51.9	94.9	40		0.00306713	128
	0.00346065	44.9	59.9	51.9	95	40.1		0.0030787	128
	0.00347222	44.9	60	52	95	40.1		0.00309028	128
	0.0034838	44.9	60	52	95.1	40.1		0.00310185	128
	0.00349537	44.9	60.1	52.1	95	40.1		0.00311343	128
	0.00350694	45	60.1	52.1	95.1	40.1		0.003125	128
	0.00351852	45	60.1	52.1	95.2	40.1		0.00313657	128
	0.00353009	45	60.2	52.2	95.1	40.1		0.00314815	128
	0.00354167	45	60.3	52.2	95.2	40.1		0.00315972	128
	0.00355324	45.1	60.3	52.3	95.2	40.1		0.0031713	128
	0.00356481	45.1	60.3	52.3	95.2	40.1		0.00318287	128
	0.00357639	45.1	60.4	52.3	95.2	40.1		0.00319444	128
	0.00358796	45.2	60.5	52.3	95.3	40.1		0.00320602	128
	0.00359954	45.2	60.5	52.4	95.2	40.1		0.00321759	128
	0.00361111	45.2	60.6	52.4	95.3	40.2		0.00322917	128
	0.00362269	45.3	60.6	52.4	95.3	40.2		0.00324074	128
	0.00363426	45.3	60.7	52.5	95.3	40.2		0.00325231	129
	0.00364583	45.3	60.7	52.5	95.3	40.2		0.00326389	129
	0.00366898	45.3	60.7	52.6	95.3	40.2		0.00327546	129
	0.00368056	45.4	60.8	52.6	95.4	40.2		0.00328704	129
	0.00369213	45.4	60.7	52.6	95.4	40.2		0.00329861	129
	0.0037037	45.4	60.8	52.7	95.4	40.2		0.00331019	129
	0.00371528	45.5	60.9	52.6	95.4	40.2		0.00332176	129
	0.00372685	45.4	60.9	52.7	95.5	40.2		0.00333333	129
	0.00373843	45.5	61	52.8	95.5	40.2		0.00334491	129
	0.00375	45.5	61	52.8	95.5	40.2		0.00335648	130
	0.00376157	45.6	61	52.8	95.6	40.3		0.00336806	129
	0.00377315	45.6	61.1	52.9	95.6	40.3		0.00337963	129
	0.00378472	45.6	61.2	52.9	95.6	40.3		0.0033912	130
	0.0037963	45.6	61.2	52.9	95.6	40.3		0.00340278	130
	0.00380787	45.7	61.2	53	95.7	40.3		0.00341435	130
	0.00381944	45.7	61.2	53.1	95.7	40.3		0.00342593	129
	0.00383102	45.7	61.3	53.1	95.7	40.3		0.0034375	129
	0.00384259	45.8	61.3	53.1	95.7	40.3		0.00344907	129
	0.00386574	45.8	61.4	53.2	95.8	40.3		0.00346065	129
	0.00387731	45.8	61.4	53.2	95.8	40.3		0.00347222	129
	0.00388889	45.8	61.4	53.2	95.8	40.3		0.0034838	129
	0.00390046	45.9	61.4	53.2	95.8	40.4		0.00349537	129
	0.00391204	45.9	61.5	53.2	95.9	40.4		0.00350694	129
	0.00392361	45.9	61.5	53.3	95.9	40.4		0.00351852	129
	0.00393519	45.9	61.6	53.3	95.9	40.4		0.00353009	129
	0.00394676	46	61.6	53.3	95.9	40.4		0.00354167	129
	0.00395833	46	61.6	53.4	96	40.4		0.00355324	129
	0.00396991	46	61.7	53.4	96	40.4		0.00356481	129
	0.00398148	46	61.7	53.5	96	40.4		0.00357639	129
	0.00399306	46	61.7	53.5	96.1	40.4		0.00358796	129
	0.00400463	46.1	61.7	53.5	96.1	40.5		0.00359954	129
	0.0040162	46.1	61.8	53.5	96.1	40.5		0.00361111	130
	0.00402778	46.1	61.8	53.6	96.2	40.5		0.00362269	129
	0.00403935	46.2	61.8	53.6	96.2	40.5		0.00363426	129
	0.00405093	46.2	61.9	53.7	96.2	40.5		0.00364583	129
	0.0040625	46.3	61.9	53.7	96.3	40.5		0.00365741	129
	0.00407407	46.3	61.9	53.8	96.3	40.5		0.00366898	129
	0.00408565	46.3	62	53.8	96.4	40.5		0.00368056	129
	0.0041088	46.3	62	53.8	96.4	40.6		0.00369213	129
	0.00412037	46.3	62.1	53.8	96.4	40.6		0.0037037	129
	0.00413194	46.4	62.1	53.9	96.5	40.5		0.00371528	129
	0.00414352	46.4	62.1	53.9	96.5	40.6		0.00372685	129
	0.00415509	46.4	62.2	53.9	96.5	40.6		0.00373843	129
	0.00416667	46.4	62.2	54	96.6	40.6		0.00375	129
	0.00417824	46.4	62.2	54	96.6	40.6		0.00376157	129
	0.00418981	46.5	62.3	54	96.6	40.6		0.00377315	129
	0.00420139	46.5	62.3	54	96.6	40.6		0.00378472	129
	0.00421296	46.6	62.4	54.1	96.7	40.6		0.0037963	129
	0.00422454	46.6	62.4	54.1	96.7	40.7		0.00380787	129
	0.00423611	46.6	62.4	54.2	96.7	40.7		0.00381944	129
	0.00424769	46.7	62.5	54.2	96.7	40.7		0.00383102	129
	0.00425926	46.7	62.5	54.3	96.7	40.7		0.00384259	129
	0.00428241	46.7	62.5	54.3	96.7	40.7		0.00385417	129
	0.00430556	46.7	62.6	54.4	96.8	40.7		0.00386574	129
	0.00431713	46.8	62.6	54.4	96.8	40.7		0.00387731	128
	0.0043287	46.8	62.7	54.4	96.8	40.7		0.00388889	128
	0.00434028	46.8	62.7	54.4	96.7	40.7		0.00390046	128
	0.00435185	46.9	62.8	54.5	96.6	40.7		0.00391204	128
	0.00436343	46.9	62.8	54.5	96.5	40.7		0.00392361	128
	0.004375	46.9	62.8	54.6	96.5	40.8		0.00393519	128
	0.00438657	46.9	62.9	54.5	96.4	40.8		0.00394676	128
	0.00439815	47	62.9	54.6	96.4	40.8		0.00395833	128
	0.00440972	47	63	54.5	96.4	40.8		0.00396991	128
	0.0044213	47	63	54.6	96.4	40.8		0.00398148	128
	0.00443287	47	63.1	54.6	96.4	40.8		0.00399306	128
	0.00444444	47	63.1	54.7	96.4	40.8		0.00400463	128
	0.00445602	47.1	63.2	54.7	96.4	40.8		0.0040162	128
	0.00446759	47.1	63.3	54.8	96.5	40.8		0.00402778	128
	0.00447917	47.1	63.3	54.8	96.4	40.8		0.00403935	128
	0.00450231	47.2	63.3	54.8	96.4	40.8		0.00405093	128
	0.00451389	47.2	63.3	54.8	96.4	40.9		0.0040625	128
	0.00452546	47.2	63.3	54.9	96.5	40.9		0.00407407	128
	0.00453704	47.2	63.4	54.9	96.5	40.9		0.00408565	128
	0.00454861	47.2	63.4	55	96.5	40.9		0.00409722	128
	0.00456019	47.3	63.4	55	96.5	40.9		0.0041088	128
	0.00457176	47.3	63.5	55	96.5	40.9		0.00412037	128
	0.00458333	47.3	63.5	55.1	96.6	40.9		0.00413194	128
	0.00459491	47.4	63.5	55.1	96.6	41		0.00414352	128
	0.00460648	47.4	63.5	55.1	96.6	41		0.00415509	128
	0.00461806	47.4	63.6	55.1	96.6	41		0.00416667	128
	0.00462963	47.4	63.6	55.2	96.6	41		0.00417824	128
	0.0046412	47.4	63.7	55.2	96.6	41		0.00418981	128
	0.00465278	47.5	63.7	55.2	96.6	41		0.00420139	128
	0.00466435	47.5	63.7	55.3	96.6	41		0.00421296	128
	0.00467593	47.5	63.8	55.2	96.6	41		0.00422454	128
	0.00469907	47.5	63.8	55.3	96.6	41.1		0.00423611	128
	0.00471065	47.6	63.9	55.4	96.6	41		0.00424769	128
	0.00472222	47.6	63.9	55.4	96.6	41.1		0.00425926	128
	0.0047338	47.6	63.9	55.4	96.7	41		0.00427083	128
	0.00474537	47.6	63.9	55.4	96.6	41.1		0.00428241	128
	0.00475694	47.7	64	55.5	96.6	41.1		0.00429398	128
	0.00476852	47.7	64.1	55.5	96.7	41.1		0.00430556	128
	0.00478009	47.7	64.1	55.6	96.7	41.1		0.00431713	128
	0.00479167	47.7	64.1	55.5	96.6	41.1		0.0043287	128
	0.00480324	47.8	64.2	55.6	96.7	41.1		0.00434028	128
	0.00481481	47.8	64.2	55.6	96.7	41.1		0.00435185	128
	0.00482639	47.8	64.2	55.6	96.7	41.1		0.00436343	128
	0.00483796	47.8	64.3	55.7	96.8	41.1		0.004375	128
	0.00484954	47.9	64.3	55.6	96.8	41.1		0.00438657	128
	0.00486111	47.9	64.3	55.7	96.8	41.2		0.00439815	128
	0.00487269	47.9	64.4	55.7	96.8	41.1		0.00440972	128
	0.00488426	47.9	64.4	55.7	96.8	41.2		0.0044213	128
	0.00489583	47.9	64.4	55.8	96.8	41.2		0.00443287	128
	0.00490741	48	64.4	55.9	96.8	41.2		0.00444444	128
	0.00491898	48	64.5	55.9	96.8	41.2		0.00445602	128
	0.00493056	48	64.5	55.9	96.8	41.2		0.00446759	128
	0.0049537	48.1	64.5	55.9	96.9	41.3		0.00447917	128
	0.00496528	48	64.6	56	96.8	41.3		0.00449074	128
	0.00497685	48.1	64.6	55.9	96.9	41.3		0.00450231	128
	0.00498843	48.1	64.6	56	96.9	41.3		0.00451389	128
	0.005	48.1	64.7	56	96.9	41.3		0.00452546	128
	0.00501157	48.2	64.7	56	96.9	41.3		0.00453704	128
	0.00502315	48.2	64.8	56.1	96.9	41.3		0.00454861	128
	0.00503472	48.2	64.8	56.1	96.9	41.3		0.00456019	128
	0.0050463	48.3	64.8	56.2	96.9	41.3		0.00457176	128
	0.00506944	48.2	64.9	56.2	96.9	41.3		0.00458333	128
	0.00508102	48.3	64.9	56.2	96.9	41.3		0.00459491	128
	0.00509259	48.3	65	56.3	96.9	41.3		0.00460648	128
	0.00510417	48.3	65	56.2	97	41.3		0.00461806	128
	0.00511574	48.4	65	56.3	97	41.3		0.00462963	128
	0.00512731	48.4	65.1	56.4	97	41.3		0.0046412	128
	0.00513889	48.4	65.1	56.4	97	41.4		0.00465278	128
	0.00515046	48.4	65.1	56.4	97.1	41.4		0.00466435	128
	0.00516204	48.4	65.1	56.3	97.1	41.4		0.00467593	128
	0.00517361	48.5	65.2	56.4	97	41.5		0.0046875	128
	0.00518519	48.5	65.2	56.5	97	41.4		0.00469907	128
	0.00519676	48.5	65.2	56.5	97	41.4		0.00471065	128
	0.00520833	48.6	65.3	56.6	97	41.4		0.00472222	128
	0.00521991	48.6	65.3	56.5	97	41.4		0.0047338	128
	0.00524306	48.6	65.4	56.5	97	41.4		0.00474537	128
	0.00525463	48.6	65.4	56.6	97	41.4		0.00475694	128
	0.0052662	48.6	65.4	56.6	97	41.5		0.00476852	128
	0.00527778	48.7	65.4	56.6	97	41.5		0.00478009	128
	0.00528935	48.7	65.5	56.7	97	41.4		0.00479167	128
	0.00530093	48.7	65.5	56.6	97	41.5		0.00480324	128
	0.0053125	48.7	65.5	56.7	97	41.5		0.00481481	128
	0.00532407	48.8	65.6	56.7	97.1	41.5		0.00482639	128
	0.00533565	48.8	65.6	56.8	97.1	41.5		0.00483796	128
	0.00534722	48.8	65.6	56.9	97.1	41.6		0.00484954	128
	0.0053588	48.8	65.7	56.8	97.1	41.5		0.00486111	129
	0.00537037	48.8	65.7	56.8	97.1	41.5		0.00487269	128
	0.00538194	48.9	65.8	56.9	97.1	41.5		0.00488426	128
	0.00539352	48.9	65.8	56.9	97.1	41.5		0.00489583	128
	0.00541667	48.9	65.8	57	97.1	41.5		0.00490741	128
	0.00542824	48.9	65.8	57	97.1	41.6		0.00491898	129
	0.00543981	48.9	65.9	57	97.1	41.6		0.00493056	128
	0.00545139	49	65.9	57	97.1	41.6		0.00494213	128
	0.00546296	49	66	57.1	97.2	41.6		0.0049537	129
	0.00547454	49	66.1	57.1	97.2	41.6		0.00496528	129
	0.00548611	49	66.1	57.1	97.1	41.6		0.00497685	129
	0.00549769	49	66.1	57.1	97.1	41.7		0.00498843	128
	0.00550926	49.1	66.2	57.2	97.1	41.6		0.005	128
	0.00552083	49.1	66.2	57.2	97.2	41.6		0.00501157	129
	0.00553241	49.1	66.2	57.2	97.2	41.7		0.00502315	129
	0.00554398	49.1	66.3	57.2	97.2	41.7		0.00503472	128
	0.00556713	49.2	66.4	57.3	97.2	41.7		0.0050463	129
	0.0055787	49.2	66.5	57.3	97.2	41.7		0.00505787	129
	0.00560185	49.2	66.5	57.4	97.2	41.7		0.00506944	129
	0.00561343	49.3	66.5	57.4	97.2	41.7		0.00508102	129
	0.005625	49.3	66.6	57.4	97.2	41.7		0.00509259	128
	0.00563657	49.3	66.6	57.4	97.3	41.7		0.00510417	129
	0.00564815	49.3	66.7	57.4	97.2	41.7		0.00511574	129
	0.00565972	49.3	66.7	57.5	97.3	41.7		0.00512731	129
	0.0056713	49.3	66.8	57.5	97.3	41.7		0.00513889	129
	0.00568287	49.4	66.8	57.5	97.3	41.8		0.00515046	129
	0.00569444	49.4	66.8	57.5	97.3	41.8		0.00516204	129
	0.00570602	49.4	66.9	57.6	97.3	41.8		0.00517361	129
	0.00571759	49.4	66.9	57.6	97.3	41.8		0.00518519	129
	0.00572917	49.4	67	57.6	97.3	41.8		0.00519676	129
	0.00574074	49.5	67	57.5	97.3	41.8		0.00520833	129
	0.00575231	49.5	67	57.6	97.3	41.8		0.00521991	129
	0.00576389	49.5	67.1	57.7	97.3	41.8		0.00523148	129
	0.00577546	49.5	67.1	57.7	97.3	41.8		0.00524306	129
	0.00578704	49.5	67.1	57.7	97.4	41.8		0.00525463	129
	0.00581019	49.6	67.2	57.7	97.3	41.8		0.0052662	129
	0.00582176	49.6	67.3	57.8	97.3	41.9		0.00527778	128
	0.00584491	49.6	67.3	57.7	97.4	41.9		0.00528935	128
	0.00585648	49.7	67.3	57.8	97.4	41.9		0.00530093	128
	0.00586806	49.7	67.4	57.8	97.3	41.9		0.0053125	128
	0.00587963	49.7	67.4	57.9	97.4	41.9		0.00532407	128
	0.0058912	49.8	67.4	57.9	97.4	41.9		0.00533565	128
	0.00590278	49.8	67.4	57.9	97.4	41.9		0.00534722	128
	0.00591435	49.8	67.5	58	97.4	41.9		0.0053588	128
	0.00592593	49.8	67.5	58	97.4	41.9		0.00537037	128
	0.0059375	49.8	67.5	58	97.4	41.9		0.00538194	128
	0.00594907	49.8	67.5	58	97.4	41.9		0.00539352	128
	0.00596065	49.9	67.6	58	97.4	41.9		0.00540509	128
	0.00597222	49.9	67.6	58	97.4	42		0.00541667	128
	0.0059838	49.9	67.7	58.1	97.4	42		0.00542824	128
	0.00599537	49.9	67.7	58.1	97.4	42		0.00543981	128
	0.00600694	50	67.7	58.1	97.5	42		0.00545139	128
	0.00601852	50	67.7	58.1	97.5	42		0.00546296	128
	0.00603009	50	67.8	58.1	97.5	42		0.00547454	128
	0.00604167	50	67.8	58.1	97.5	42		0.00548611	128
	0.00605324	50	67.8	58.2	97.6	42		0.00549769	128
	0.00607639	50	67.8	58.3	97.6	42		0.00550926	128
	0.00608796	50.1	67.9	58.2	97.5	42		0.00552083	129
	0.00609954	50.1	67.9	58.3	97.6	42.1		0.00553241	128
	0.00611111	50.1	68	58.2	97.5	42		0.00554398	128
	0.00612269	50.1	68	58.2	97.5	42.1		0.00555556	129
	0.00613426	50.1	68	58.3	97.5	42.1		0.00556713	129
	0.00614583	50.2	68	58.3	97.6	42.1		0.0055787	129
	0.00615741	50.2	68.1	58.4	97.6	42.1		0.00559028	129
	0.00616898	50.2	68.1	58.3	97.6	42.1		0.00560185	129
	0.00618056	50.2	68.1	58.4	97.6	42.1		0.00561343	129
	0.00619213	50.2	68.2	58.4	97.6	42.1		0.005625	129
	0.0062037	50.3	68.2	58.4	97.5	42.1		0.00563657	129
	0.00622685	50.3	68.2	58.4	97.6	42.1		0.00564815	129
	0.00623843	50.3	68.2	58.4	97.6	42.1		0.00565972	129
	0.00625	50.3	68.2	58.6	97.6	42.1		0.0056713	129
	0.00626157	50.3	68.3	58.5	97.5	42.1		0.00568287	129
	0.00627315	50.4	68.3	58.5	97.5	42.2		0.00569444	129
	0.00628472	50.4	68.4	58.7	97.6	42.2		0.00570602	129
	0.0062963	50.4	68.4	58.6	97.6	42.2		0.00571759	129
	0.00630787	50.4	68.4	58.6	97.5	42.2		0.00572917	129
	0.00631944	50.4	68.5	58.6	97.6	42.2		0.00574074	129
	0.00633102	50.5	68.5	58.7	97.6	42.2		0.00575231	130
	0.00634259	50.5	68.5	58.7	97.6	42.2		0.00576389	130
	0.00635417	50.5	68.5	58.6	97.6	42.2		0.00577546	130
	0.00636574	50.5	68.5	58.7	97.6	42.2		0.00578704	130
	0.00637731	50.5	68.6	58.8	97.5	42.2		0.00579861	130
	0.00638889	50.5	68.6	58.7	97.6	42.2		0.00581019	130
	0.00640046	50.6	68.6	58.8	97.6	42.2		0.00582176	130
	0.00641204	50.6	68.7	58.8	97.6	42.2		0.00583333	130
	0.00642361	50.6	68.7	58.9	97.6	42.2		0.00584491	130
	0.00644676	50.6	68.7	58.8	97.6	42.2		0.00585648	130
	0.00645833	50.6	68.7	58.9	97.6	42.2		0.00586806	130
	0.00646991	50.6	68.7	58.8	97.6	42.3		0.00587963	130
	0.00648148	50.7	68.8	58.9	97.6	42.3		0.0058912	130
	0.00649306	50.7	68.7	58.9	97.5	42.2		0.00590278	130
	0.00650463	50.7	68.1	59	97.4	42.3		0.00591435	130
	0.0065162	50.7	67.9	59	97.4	42.3		0.00592593	130
	0.00652778	50.7	67.9	59	97.4	42.3		0.0059375	130
	0.00653935	50.7	67.9	59	97.4	42.3		0.00594907	130
	0.00655093	50.7	67.9	59	97.4	42.3		0.00596065	130
	0.0065625	50.8	67.8	59.1	97.4	42.3		0.00597222	130
	0.00657407	50.8	67.9	59	97.5	42.3		0.0059838	130
	0.00658565	50.8	67.9	59.1	97.5	42.3		0.00599537	130
	0.00659722	50.8	67.8	59.1	97.5	42.3		0.00600694	130
	0.0066088	50.9	67.8	59.1	97.5	42.3		0.00601852	130
	0.00663194	50.9	67.9	59.1	97.6	42.3		0.00603009	130
	0.00664352	50.9	67.9	59.1	97.6	42.3		0.00604167	130
	0.00665509	50.9	67.9	59.2	97.6	42.3		0.00605324	130
	0.00666667	50.9	67.9	59.2	97.7	42.4		0.00606481	130
	0.00667824	50.9	68	59.2	97.7	42.4		0.00607639	130
	0.00668981	51	68	59.2	97.7	42.4		0.00608796	130
	0.00670139	50.9	68	59.2	97.7	42.4		0.00609954	130
	0.00671296	50.9	68	59.2	97.7	42.4		0.00611111	130
	0.00672454	51	68	59.2	97.8	42.4		0.00612269	131
	0.00674769	51	68	59.2	97.7	42.4		0.00613426	131
	0.00675926	51	68.1	59.3	97.8	42.4		0.00614583	131
	0.00677083	51.1	68	59.2	97.8	42.5		0.00615741	131
	0.00678241	51	68.1	59.3	97.7	42.5		0.00616898	131
	0.00679398	51.1	68.1	59.3	97.8	42.5		0.00618056	131
	0.00680556	51.1	68.1	59.4	97.8	42.5		0.00619213	131
	0.00681713	51.1	68.1	59.4	97.8	42.5		0.0062037	131
	0.0068287	51.1	68.1	59.4	97.8	42.5		0.00621528	131
	0.00684028	51.1	68.2	59.4	97.8	42.5		0.00622685	131
	0.00685185	51.2	68.2	59.4	97.9	42.5		0.00623843	131
	0.006875	51.2	68.3	59.4	97.9	42.5		0.00625	131
	0.00688657	51.2	68.3	59.4	97.9	42.5		0.00626157	131
	0.00689815	51.2	68.3	59.4	97.9	42.5		0.00627315	131
	0.00690972	51.2	68.3	59.4	97.9	42.6		0.00628472	131
	0.0069213	51.2	68.3	59.5	97.9	42.6		0.0062963	131
	0.00693287	51.3	68.4	59.6	97.9	42.6		0.00630787	131
	0.00694444	51	66	60.3	97.5	41.8		0.00631944	131
	0.00695602	51	64.6	60.1	96.1	41.5		0.00633102	131
	0.00696759	50.9	64.1	60	95.1	41.4		0.00634259	131
	0.00699074	50.9	63.6	59.9	94.1	41.4		0.00635417	131
	0.00700231	50.9	63.3	59.9	93.4	41.3		0.00636574	131
	0.00701389	50.9	63	59.8	92.7	41.3		0.00637731	131
	0.00702546	50.8	62.7	59.8	92.3	41.3		0.00638889	131
	0.00703704	50.8	62.4	59.8	91.8	41.2		0.00640046	131
	0.00704861	50.8	62.2	59.7	91.3	41.2		0.00641204	131
	0.00706019	50.8	61.9	59.7	90.9	41.2		0.00642361	131
	0.00707176	50.8	61.7	59.6	90.5	41.1		0.00643519	131
	0.00708333	50.8	61.4	59.5	90	41.1		0.00644676	131
	0.00709491	50.9	61.3	61.2	89.7	41.1		0.00645833	131
	0.00710648	50.9	61.1	62.6	89.3	41.1		0.00646991	131
	0.00711806	51	60.9	62.9	88.9	41.1		0.00648148	130
	0.00712963	51	60.8	63.1	88.5	41.1		0.00649306	130
	0.0071412	51	60.6	63	88.2	41.1		0.00650463	130
	0.00715278	51	60.4	63	87.8	41.1		0.0065162	130
	0.00716435	51	60.2	62.9	87.4	41.1		0.00652778	130
	0.00717593	50.9	60.1	62.9	87.1	41		0.00653935	130
	0.0071875	50.9	59.9	62.8	86.8	41		0.00655093	130
	0.00721065	50.9	59.7	62.7	86.4	41		0.0065625	130
	0.00722222	50.8	59.6	62.6	86.1	41		0.00657407	130
	0.0072338	50.9	59.5	62.6	85.8	41		0.00658565	130
	0.00724537	50.8	59.3	62.5	85.6	40.9		0.00659722	130
	0.00725694	50.8	59.2	62.4	85.3	41		0.0066088	130
	0.00726852	50.8	59.1	62.3	85	40.9		0.00662037	130
	0.00728009	50.8	59	62.3	84.7	40.9		0.00663194	130
	0.00729167	50.8	58.8	62.2	84.4	40.9		0.00664352	130
	0.00730324	50.7	58.7	62.1	84.2	40.9		0.00665509	130
	0.00731481	50.7	58.6	62	83.8	40.9		0.00666667	130
	0.00732639	50.7	58.4	61.9	83.6	40.9		0.00667824	130
	0.00733796	50.7	58.3	61.8	83.3	40.9		0.00668981	130
	0.00734954	50.7	58.3	61.8	83	40.9		0.00670139	130
	0.00736111	50.7	58.2	61.7	82.8	40.9		0.00671296	130
	0.00737269	50.7	58.1	61.6	82.5	40.9		0.00672454	130
	0.00738426	50.7	58	61.6	82.3	41		0.00673611	130
	0.00739583	50.7	57.9	61.5	82.2	41		0.00674769	130
	0.00740741	50.6	57.8	61.5	82	41		0.00675926	130
	0.00741898	50.5	57.6	61.4	81.8	41.1		0.00677083	130
	0.00743056	50.5	57.4	61.3	81.6	41.2		0.00678241	130
	0.00744213	50.4	57.3	61.2	81.5	41.1		0.00679398	129
	0.00746528	50.4	57.2	61.2	81.2	41.1		0.00680556	129
	0.00747685	50.4	57.1	61.1	81	41.1		0.00681713	129
	0.00748843	50.4	57	61	80.9	41.1		0.0068287	129
	0.0075	50.4	57	60.9	80.6	41.1		0.00684028	129
	0.00751157	50.4	56.9	60.8	80.5	41.1		0.00685185	129
	0.00752315	50.3	56.8	60.8	80.3	41.1		0.00686343	129
	0.00753472	50.3	56.7	60.7	80.1	41.1		0.006875	129
	0.0075463	50.3	56.6	60.6	79.9	41.1		0.00688657	128
	0.00755787	50.2	56.5	60.6	79.7	41.1		0.00689815	128
	0.00756944	50.2	56.4	60.5	79.5	41		0.00690972	129
	0.00758102	50.2	56.3	60.4	79.3	41.1		0.0069213	128
	0.00759259	50.2	56.3	60.3	79.1	41		0.00693287	128
	0.00760417	50.2	56.2	60.3	79	41		0.00694444	128
	0.00762731	50.1	56.1	60.1	78.8	41		0.00695602	125
	0.00765046	50.1	56	60	78.5	41		0.00696759	100
	0.00766204	50	55.9	60	78.3	41		0.00697917	94
	0.00767361	50	55.8	59.9	78.1	41		0.00699074	94
	0.00768519	50	55.7	59.8	77.9	41		0.00700231	93
	0.00769676	50	55.7	59.7	77.7	41		0.00701389	93
	0.00770833	50	55.6	59.7	77.6	40.9		0.00702546	92
	0.00771991	49.9	55.5	59.6	77.4	41		0.00703704	92
	0.00773148	49.9	55.5	59.5	77.3	41		0.00704861	91
	0.00774306	49.9	55.3	59.4	77.1	40.9		0.00706019	91
	0.00775463	49.9	55.3	59.4	77	40.9		0.00707176	91
	0.0077662	49.9	55.2	59.4	76.8	40.9		0.00708333	90
	0.00777778	49.8	55.2	59.3	76.6	40.9		0.00709491	90
	0.00778935	49.8	55.1	59.2	76.5	40.9		0.00710648	90
	0.00780093	49.8	55	59.1	76.3	40.9		0.00711806	89
	0.0078125	49.8	55	59.1	76.1	40.9		0.00712963	89
	0.00782407	49.7	54.9	59	76	40.9		0.0071412	88
	0.00783565	49.7	54.8	58.9	75.8	40.9		0.00715278	88
	0.00784722	49.7	54.8	58.9	75.7	40.9		0.00716435	88
	0.00787037	49.7	54.7	58.8	75.5	40.9		0.00717593	87
	0.00789352	49.7	54.6	58.7	75.2	40.8		0.0071875	87
	0.00790509	49.6	54.5	58.6	75.1	40.8		0.00719907	87
	0.00791667	49.6	54.5	58.6	74.9	40.8		0.00721065	87
	0.00792824	49.6	54.4	58.5	74.8	40.8		0.00722222	86
	0.00793981	49.5	54.4	58.4	74.6	40.8		0.0072338	86
	0.00795139	49.5	54.3	58.4	74.5	40.8		0.00724537	85
	0.00796296	49.5	54.2	58.3	74.3	40.8		0.00725694	85
	0.00797454	49.5	54.2	58.2	74.1	40.8		0.00726852	85
	0.00798611	49.5	54.1	58.2	74	40.8		0.00728009	85
	0.00799769	49.4	54.1	58.1	73.9	40.8		0.00729167	84
	0.00800926	49.4	54	58	73.8	40.8		0.00730324	84
	0.00802083	49.4	54	58	73.6	40.8		0.00731481	84
	0.00803241	49.4	53.9	58	73.5	40.8		0.00732639	84
	0.00804398	49.3	53.8	57.9	73.3	40.8		0.00733796	83
	0.00806713	49.3	53.7	57.8	73.2	40.8		0.00734954	83
	0.0080787	49.3	53.7	57.8	73.1	40.8		0.00736111	83
	0.00809028	49.3	53.7	57.7	72.9	40.8		0.00737269	82
	0.00810185	49.2	53.6	57.6	72.8	40.7		0.00738426	79
	0.00811343	49.2	53.5	57.6	72.6	40.7		0.00739583	73
	0.008125	49.2	53.5	57.5	72.5	40.7		0.00740741	67
	0.00813657	49.2	53.4	57.5	72.4	40.7		0.00741898	59
	0.00814815	49.2	53.4	57.4	72.2	40.7		0.00743056	53
	0.00815972	49.1	53.3	57.3	72.1	40.7		0.00744213	52
	0.00818287	49.1	53.2	57.3	72	40.7		0.0074537	50
	0.00819444	49.1	53.3	57.2	71.8	40.7		0.00746528	48
	0.00820602	49.1	53.2	57.1	71.7	40.7		0.00747685	47
	0.00821759	49	53.1	57.1	71.6	40.7		0.00748843	46
	0.00822917	49	53.1	57.1	71.5	40.7		0.0075	44
	0.00824074	49	53	57	71.4	40.7		0.00751157	43
	0.00825231	49	53	57	71.2	40.7		0.00752315	42
	0.00826389	49	52.9	56.9	71.1	40.7		0.00753472	41
	0.00827546	48.9	52.9	56.9	71	40.6		0.0075463	40
	0.00828704	48.9	52.9	56.8	70.9	40.6		0.00755787	39
	0.00829861	48.9	52.8	56.8	70.8	40.7		0.00756944	39
	0.00831019	48.9	52.8	56.7	70.7	40.6		0.00758102	38
	0.00832176	48.8	52.7	56.6	70.5	40.6		0.00759259	37
	0.00833333	48.8	52.7	56.6	70.5	40.6		0.00760417	37
	0.00834491	48.8	52.6	56.5	70.3	40.6		0.00761574	36
	0.00835648	48.8	52.6	56.4	70.2	40.6		0.00762731	36
	0.00836806	48.8	52.5	56.4	70.1	40.6
	0.00837963	48.8	52.5	56.4	70	40.6
	0.0083912	48.7	52.5	56.3	69.9	40.6
	0.00840278	48.7	52.4	56.3	69.8	40.6
	0.00841435	48.7	52.4	56.2	69.7	40.6
	0.00842593	48.7	52.4	56.2	69.6	40.6
	0.0084375	48.6	52.3	56.1	69.5	40.6
	0.00846065	48.6	52.2	56.1	69.4	40.6
	0.00847222	48.6	52.2	56	69.2	40.6
	0.0084838	48.6	52.2	56	69.2	40.6
	0.00849537	48.5	52.1	55.9	69	40.6
	0.00850694	48.5	52.1	55.9	68.9	40.6
	0.00851852	48.5	52	55.8	68.8	40.5
	0.00853009	48.5	52	55.8	68.7	40.5
	0.00854167	48.5	51.9	55.7	68.6	40.5
	0.00855324	48.5	51.9	55.7	68.5	40.5
	0.00857639	48.4	51.8	55.6	68.4	40.5
	0.00858796	48.4	51.8	55.6	68.3	40.5
	0.00859954	48.4	51.8	55.5	68.2	40.5
	0.00861111	48.4	51.7	55.5	68.1	40.5
	0.00862269	48.4	51.7	55.4	68	40.5
	0.00863426	48.4	51.6	55.4	67.9	40.5
	0.00864583	48.3	51.6	55.3	67.8	40.5
	0.00865741	48.3	51.6	55.3	67.7	40.5
	0.00866898	48.3	51.5	55.2	67.5	40.5
	0.00868056	48.3	51.5	55.2	67.5	40.5
	0.00869213	48.2	51.5	55.2	67.4	40.5
	0.0087037	48.2	51.4	55.1	67.3	40.5
	0.00871528	48.2	51.4	55.1	67.2	40.5
	0.00872685	48.2	51.4	55	67.1	40.4
	0.00875	48.2	51.3	54.9	67	40.5
	0.00876157	48.1	51.3	54.9	66.9	40.5
	0.00877315	48.1	51.3	54.9	66.8	40.4
	0.00878472	48.1	51.2	54.8	66.7	40.5
	0.0087963	48.1	51.1	54.8	66.6	40.4
	0.00880787	48.1	51.1	54.8	66.6	40.4
	0.00881944	48	51.1	54.7	66.4	40.4
	0.00883102	48	51	54.7	66.4	40.4
	0.00884259	48	51	54.6	66.3	40.4
	0.00885417	48	51	54.6	66.2	40.4
	0.00886574	48	50.9	54.5	66.1	40.4
	0.00887731	48	51	54.5	66	40.4
	0.00888889	48	50.9	54.4	65.9	40.4
	0.00890046	47.9	50.8	54.4	65.8	40.4
	0.00891204	47.9	50.8	54.4	65.8	40.4
	0.00893519	47.9	50.8	54.3	65.6	40.4
	0.00894676	47.9	50.8	54.3	65.6	40.4
	0.00895833	47.8	50.7	54.2	65.5	40.4
	0.00896991	47.8	50.7	54.2	65.4	40.4
	0.00898148	47.8	50.6	54.2	65.3	40.4
	0.00899306	47.8	50.6	54.1	65.2	40.4
	0.00900463	47.7	50.6	54.1	65.2	40.4
	0.0090162	47.7	50.5	54	65.1	40.4
	0.00902778	47.7	50.6	54	65	40.3
	0.00903935	47.7	50.5	54	64.9	40.3
	0.00905093	47.7	50.5	53.9	64.8	40.3
	0.0090625	47.7	50.4	53.9	64.8	40.3
	0.00907407	47.7	50.4	53.8	64.7	40.3
	0.00908565	47.7	50.4	53.8	64.6	40.3
	0.0091088	47.9	50.3	53.7	64.5	40.3
	0.00912037	51.1	50.3	53.7	64.4	40.3
	0.00914352	42.7	50.2	53.6	64.3	40.3
	0.00915509	36.7	50.2	53.6	64.2	40.3
	0.00916667	34.1	50.3	53.6	64.2	40.3
	0.00917824	32.5	58	53.5	64.1	40.3
	0.00918981	31	31.7	53.5	64	40.3
	0.00920139	30.2	23.7	53.5	63.9	40.3
	0.00921296	29.4	20.8	57.4	63.8	40.3
	0.00922454	29	20	42.5	63.7	40.3
	0.00923611	28.6	20	31.6	63.7	40.3
	0.00924769	28.3	20.8	27.8	63.5	40.3
	0.00925926	28.1	21.6	26.5	54.4	40.3
	0.00927083	28	22.5	25.6	41.2	40.3
	0.00928241	28	23.4	25.1	35.6	40.3
	0.00930556	27.9	24.2	24.9	32.3	45.6
	0.00931713	27.9	25	25.1	29.8	31.6
	0.00934028	27.9	25.5	25.1	29.1	23.7
	0.00935185	27.8	25.8	25.1	28.7	21.7
	0.00936343	27.8	26	25.3	28.5	20.6
	0.009375	27.8	26.2	25.4	28.3	20.1
	0.00938657	27.8	26.4	25.4	28.2	20
	0.00939815	27.8	26.4	25.3	28.1	20.4
	0.00940972	27.8	26.5	25.3	28	21.1
	0.0094213	27.8	26.7	25.4	27.9	22
	0.00943287	27.8	26.8	25.6	28	23
	0.00944444	27.8	26.9	25.9	27.9	23.9
	0.00945602	27.8	26.9	26	27.9	24.6
	0.00946759	27.9	27	26	27.9	25.4
	0.00947917	27.9	27.1	25.9	27.9	26.2
	0.00949074	27.9	27.3	26	27.9	26.7
	0.00950231	28	27.5	26.1	27.9	26.9
	0.00951389	28.1	27.6	26.2	28	27.2
	0.00952546	28	27.7	26.3	28	27.5
	0.00953704	28	27.8	26.4	28	27.7
	0.00956019	28.1	27.9	26.6	28.1	27.8
	0.00957176	28.1	28	26.6	28.1	27.9
	0.00958333	28.1	28.1	26.6	28.1	27.9
	0.00959491	28.1	28.1	26.3	28.1	28.2
	0.00960648	28.1	28.1	26.3	28.2	28.4
	0.00961806	28.2	28.1	26.3	28.3	28.4
	0.00962963	28.1	28.1	26.3	28.3	28.5
	0.0096412	28.2	28.1	26.4	28.3	28.3
	0.00965278	28.2	28.1	26.5	28.3	28.3
	0.00966435	28.2	28.1	26.5	28.3	28.3
	0.00967593	28.3	28.2	26.7	28.3	28.3
	0.0096875	28.3	28.2	26.8	28.3	28.2
	0.00969907	28.4	28.2	27	28.3	28.2
	0.00971065	28.5	28.3	27	28.3	28.1
	0.00972222	28.5	28.2	27.1	28.3	28.1
	0.0097338	28.5	28.2	27.1	28.3	28.1
	0.00974537	28.5	28.3	27.1	28.3	28.1
	0.00975694	28.6	28.3	27.1	28.3	28.2
	0.00978009	28.6	28.4	27.2	28.3	28.3
	0.00979167	28.7	28.4	27.3	28.4	28.3
	0.00980324	28.8	28.5	27.3	28.4	28.3
	0.00981481	28.8	28.5	27.4	28.4	28.3
	0.00982639	28.9	28.5	27.5	28.4	28.4
	0.00983796	28.9	28.5	27.3	28.4	28.5
	0.00984954	28.9	28.4	27	28.4	28.6
	0.00986111	28.9	28.4	27.1	28.4	28.6
	0.00987269	29	28.5	27.1	28.4	28.5
	0.00988426	29	28.4	27.3	28.4	28.4
	0.00989583	29	28.5	27.3	28.4	28.4
	0.00991898	29	28.4	27.4	28.4	28.3
	0.00993056	29.1	28.4	27.5	28.4	28.4
	0.00994213	29.1	28.4	27.5	28.4	28.4
	0.0099537	29.1	28.3	27.4	28.4	28.3
	0.00996528	29.1	28.3	27.4	28.4	28.2
	0.00997685	29	28.2	27.3	28.4	28.3
	0.00998843	29	28.2	27.3	28.4	28.3
	0.0100116	29	28.2	27.3	28.4	28.3
	0.0100231	29	28.2	27.3	28.4	28.4
	0.0100347	29	28.2	27.4	28.4	28.4
	0.0100463	29.1	28.3	27.4	28.5	28.6
	0.0100579	29.1	28.3	27.4	28.5	28.9
	0.0100694	29.2	28.3	27.5	28.5	29
	0.010081	29.2	28.4	27.7	28.5	28.8
	0.0100926	29.2	28.4	27.7	28.4	28.7
	0.0101042	29.3	28.5	27.8	28.5	28.9
	0.0101157	29.4	28.6	27.8	28.4	28.8
	0.0101273	29.4	28.6	27.8	28.4	28.6
	0.0101505	29.4	28.5	27.9	28.4	28.5
	0.010162	29.4	28.5	27.9	28.4	28.5
	0.0101736	29.4	28.5	27.8	28.4	28.6
	0.0101852	29.3	28.4	27.6	28.4	28.6
	0.0101968	29.2	28.4	27.6	28.4	28.6
	0.0102083	29.1	28.3	27.5	28.4	28.6
	0.0102199	29.1	28.3	27.4	28.5	28.8
	0.0102315	29	28.2	27.2	28.5	28.8
	0.0102431	29	28.3	27.3	28.5	28.6
	0.0102546	29	28.3	27.5	28.5	28.7
	0.0102662	29	28.3	27.6	28.5	28.8
	0.0102778	29	28.4	27.7	28.5	28.7
	0.0102894	29.1	28.4	27.7	28.5	28.7
	0.0103125	29.1	28.4	27.7	28.5	28.6
	0.0103241	29.2	28.4	27.6	28.4	28.5
	0.0103356	29.1	28.4	27.6	28.5	28.5
	0.0103588	29.1	28.3	27.5	28.4	28.5
	0.0103704	29.1	28.2	27.7	28.5	28.5
	0.0103819	29.1	28.3	27.8	28.4	28.5
	0.0103935	29.1	28.4	27.8	28.5	28.6
	0.0104051	29.1	28.4	27.8	28.4	28.5
	0.0104167	29.2	28.3	27.8	28.4	28.5
	0.0104282	29.1	28.3	27.8	28.5	28.4
	0.0104398	29.1	28.3	27.7	28.5	28.3
	0.0104514	29.1	28.2	27.7	28.5	28.4
	0.010463	29.1	28.2	27.8	28.5	28.5
	0.0104745	29.1	28.3	27.8	28.5	28.5
	0.0104977	29.1	28.3	27.8	28.5	28.6
	0.0105093	29.1	28.3	27.9	28.5	28.7
	0.0105208	29	28.3	27.8	28.5	28.7
	0.0105324	29	28.2	27.6	28.5	28.6
	0.010544	29	28.2	27.5	28.5	28.6
	0.0105556	28.9	28.2	27.7	28.5	28.7
	0.0105671	28.9	28.2	27.8	28.5	28.9
	0.0105787	29	28.3	27.8	28.5	29
	0.0105903	29	28.3	27.9	28.5	28.9
	0.0106019	29	28.4	28	28.5	28.7
	0.010625	29.1	28.4	28	28.5	28.7
	0.0106366	29.1	28.4	28	28.5	28.7
	0.0106481	29.2	28.4	28	28.5	28.8
	0.0106597	29.2	28.4	28	28.5	28.8
	0.0106713	29.2	28.5	28	28.5	28.7
	0.0106829	29.3	28.5	28	28.5	28.7
	0.0106944	29.3	28.5	28	28.6	28.7
	0.010706	29.2	28.5	28.1	28.6	28.7
	0.0107176	29.2	28.5	27.9	28.6	28.7
	0.0107292	29.2	28.5	27.9	28.6	28.9
	0.0107407	29.2	28.5	27.8	28.6	29
	0.0107523	29.1	28.5	27.7	28.7	29.1
	0.0107639	29.1	28.4	27.7	28.6	29.1
	0.0107755	29.1	28.4	27.7	28.7	29.3
	0.010787	29.1	28.4	27.8	28.7	29.3
	0.0107986	29.1	28.5	27.9	28.7	29.5
	0.0108102	29.1	28.5	28	28.7	29.4
	0.0108218	29.2	28.5	28	28.7	29.2
	0.0108449	29.2	28.5	28	28.7	29.3
	0.0108565	29.2	28.5	28	28.7	29.3
	0.0108681	29.2	28.6	28.1	28.7	29.1
	0.0108796	29.2	28.5	28.2	28.6	28.9
	0.0108912	29.2	28.4	28.2	28.6	28.8
	0.0109028	29.2	28.4	28.2	28.6	28.7
	0.0109144	29.1	28.3	28.1	28.6	28.7
	0.0109259	29.1	28.3	28.1	28.6	28.9
	0.0109375	29.2	28.4	28.1	28.6	28.9
	0.0109491	29.2	28.4	28.1	28.6	29
	0.0109606	29.2	28.5	28.1	28.7	29
	0.0109722	29.2	28.5	28.1	28.6	28.9
	0.0109838	29.3	28.5	28	28.6	28.9
	0.0109954	29.3	28.5	28	28.6	29
	0.0110069	29.3	28.5	28.1	28.6	28.9
	0.0110185	29.3	28.6	28.1	28.6	28.7
	0.0110301	29.3	28.5	28.1	28.6	28.7
	0.0110417	29.3	28.5	28.2	28.6	28.6
	0.0110532	29.3	28.5	28.2	28.6	28.6
	0.0110648	29.4	28.5	28.2	28.6	28.6
	0.0110764	29.3	28.5	28.2	28.6	28.7
	0.0110995	29.4	28.5	28.3	28.5	28.6
	0.0111111	29.4	28.5	28.4	28.5	28.7
	0.0111227	29.4	28.5	28.4	28.5	28.6
	0.0111343	29.5	28.5	28.4	28.6	28.5
	0.0111458	29.5	28.6	28.3	28.5	28.4
	0.0111574	29.5	28.6	28.3	28.6	28.6
	0.011169	29.6	28.7	28.3	28.6	28.6
	0.0111806	29.6	28.7	28.2	28.6	28.7
	0.0111921	29.6	28.8	28.3	28.6	28.7
	0.0112037	29.5	28.7	28.2	28.6	28.7
	0.0112153	29.5	28.7	28.3	28.6	28.8
	0.0112384	29.5	28.7	28.3	28.7	28.8
	0.01125	29.5	28.7	28.3	28.7	29
	0.0112616	29.5	28.7	28.4	28.7	29
	0.0112731	29.5	28.7	28.3	28.7	29
	0.0112847	29.5	28.7	28.3	28.7	29.1
	0.0112963	29.5	28.7	28.3	28.8	29.1
	0.0113079	29.4	28.6	28.3	28.8	29.1
	0.0113194	29.4	28.7	28.3	28.7	28.9
	0.011331	29.3	28.6	28.3	28.7	28.9
	0.0113426	29.3	28.5	28.3	28.7	28.9
	0.0113542	29.3	28.6	28.4	28.7	28.7

## Sheet: Fig4(B)
	Temperature mesurments in TMTCP during 90W 10 minute microwave ablation
	Thermocouple Measurements							Ablation Probe Measurements
	Device Name:	OctTCTemp2000V2						Probe type:	LK 15
	Device Description:	Eight Channel Thermocouple Temperature Data Logger with Display						Probe settings:	90W, 10min, Liver
	Device ID:	MultiChannel
		Channel 2	Channel 4	Channel 6	Channel 8	Channel 10
	Normalized Time	Thermocouple 1 (°C)	Thermocouple 2 (°C)	Thermocouple 3 (°C)	Thermocouple 4 (°C)	Thermocouple 5 (°C)		Normalized Time	Temperature (°C)
	-9.25926e-05	34.8	34.4	34.7	34.4	35		0	33
	-8.10185e-05	34.8	34.4	34.7	34.5	34.9		1.15741e-05	33
	-6.94444e-05	34.8	34.4	34.8	34.5	34.9		2.31481e-05	33
	-5.78704e-05	34.8	34.4	34.7	34.5	34.9		3.47222e-05	33
	-4.62963e-05	34.8	34.4	34.8	34.4	34.9		4.62963e-05	33
	-3.47222e-05	34.8	34.4	34.7	34.5	35		5.78704e-05	33
	-2.31481e-05	34.8	34.4	34.7	34.4	34.9		5.78704e-05	33
	-1.15741e-05	34.8	34.5	34.8	34.5	34.9		6.94444e-05	55
	0	35	37.5	34.9	35	35.3		8.10185e-05	70
	1.15741e-05	36	49.9	35.1	37.6	35.6		9.25926e-05	78
	2.31482e-05	36.9	60.9	35.4	40.2	35.7		0.000104167	86
	3.47222e-05	38.1	74.2	35.6	43.2	35.7		0.000115741	93
	4.62963e-05	38.9	84.8	35.8	45.7	35.7		0.000127315	98
	5.78704e-05	39.9	93.3	36	48.6	35.7		0.000138889	103
	6.94444e-05	40.8	97.8	36.3	51.5	35.8		0.000150463	109
	8.10185e-05	41.7	100.7	36.5	54.5	35.8		0.000162037	111
	9.25926e-05	42.8	102.3	36.7	58	35.8		0.000173611	115
	0.000104167	43.7	102.9	36.9	61	35.8		0.000185185	117
	0.000115741	44.7	103.6	37.2	64.7	35.8		0.000196759	118
	0.000127315	45.5	103.9	37.4	69.4	35.8		0.000208333	122
	0.000138889	46.5	104.2	37.6	74.3	35.8		0.000219907	123
	0.000150463	47.6	104.9	37.9	82.1	35.8		0.000231481	125
	0.000162037	48.4	105.2	38.1	85.8	35.8		0.000243056	125
	0.000173611	49.4	105.5	38.3	89.1	35.8		0.00025463	127
	0.000196759	50.5	106	38.7	91.8	35.9		0.000266204	129
	0.000208333	51.4	106.6	38.9	93.2	35.8		0.000277778	129
	0.000219907	52.5	107.4	39.2	93.9	35.9		0.000289352	129
	0.000231481	53.4	107.9	39.5	94.8	35.9		0.000300926	130
	0.000243056	54.4	108	39.8	95.4	35.9		0.0003125	132
	0.00025463	55.4	108.1	40.1	96.2	35.9		0.000324074	133
	0.000266204	56.3	108.1	40.4	96.8	35.9		0.000335648	133
	0.000277778	57.4	108.2	40.8	97.4	36		0.000347222	133
	0.000289352	58.3	108.4	41.1	97.7	36		0.000358796	133
	0.000300926	59.4	108.5	41.4	98.1	36		0.00037037	135
	0.0003125	60.3	108.7	41.7	98.4	36		0.000381944	136
	0.000324074	61.3	109	42.1	98.8	36.1		0.000393519	135
	0.000335648	62.2	109.1	42.4	99	36.1		0.000405093	136
	0.000347222	63.2	108.9	42.8	99.3	36.1		0.000416667	139
	0.000358796	64	109	43.1	99.5	36.1		0.000428241	130
	0.00037037	64.9	109	43.4	99.7	36.2		0.000439815	132
	0.000381944	65.7	109.1	43.8	99.9	36.2		0.000451389	130
	0.000405093	66.7	109.2	44.2	100.1	36.2		0.000462963	129
	0.000428241	68.2	109.4	44.9	100.4	36.3		0.000474537	130
	0.000439815	68.9	109.6	45.3	100.6	36.3		0.000486111	129
	0.000451389	69.6	109.8	45.6	100.8	36.3		0.000497685	128
	0.000462963	70.3	110.3	46	101.2	36.3		0.000509259	127
	0.000474537	71	110.5	46.3	101.3	36.3		0.000520833	128
	0.000486111	71.6	110.7	46.7	101.5	36.3		0.000532407	128
	0.000497685	72.2	110.8	47	101.8	36.4		0.000543981	128
	0.000509259	72.8	111.1	47.5	102.1	36.4		0.000555556	127
	0.000520833	73.4	111.4	47.8	102.1	36.4		0.00056713	128
	0.000532407	74.2	112.5	48.3	102.4	36.4		0.000578704	127
	0.000543981	74.6	113	48.6	102.8	36.5		0.000590278	128
	0.00056713	75.3	113.4	49	103.1	36.5		0.000601852	127
	0.000578704	75.8	113.7	49.4	103.2	36.5		0.000613426	127
	0.000590278	76.3	114	49.7	103.4	36.6		0.000625	127
	0.000601852	76.7	114.1	50	103.6	36.6		0.000636574	127
	0.000613426	77.2	114.2	50.4	103.6	36.6		0.000648148	126
	0.000625	77.6	114.5	50.7	103.7	36.6		0.000659722	126
	0.000636574	78	114.7	51	103.9	36.6		0.000671296	126
	0.000648148	78.4	114.9	51.4	104	36.7		0.00068287	126
	0.000659722	78.7	115	51.7	104.2	36.7		0.000694444	125
	0.000671296	79.2	115.3	52	104.5	36.7		0.000706019	126
	0.00068287	79.4	115.4	52.3	104.3	36.7		0.000717593	126
	0.000706019	79.8	115.5	52.6	103.8	36.7		0.000729167	125
	0.000717593	80.1	115.7	52.9	103.6	36.8		0.000740741	125
	0.000729167	80.4	115.9	53.2	103.6	36.8		0.000752315	126
	0.000740741	80.7	116.1	53.5	103.9	36.8		0.000763889	126
	0.000752315	81	116.2	53.8	104.2	36.8		0.000775463	126
	0.000763889	81.2	116.5	54	104.3	36.8		0.000787037	124
	0.000775463	81.5	116.5	54.3	104.5	36.9		0.000798611	124
	0.000787037	81.7	116.4	54.6	104.1	36.9		0.000810185	125
	0.000798611	81.9	116.4	54.8	104	36.9		0.000821759	124
	0.000810185	82.2	116.3	55.1	104.5	36.9		0.000833333	124
	0.000821759	82.4	116.4	55.3	105.1	36.9		0.000844907	122
	0.000833333	82.6	116.6	55.6	105.2	36.9		0.000856481	120
	0.000844907	82.8	116.9	55.8	105.4	37		0.000868056	118
	0.000856481	83	117.2	56	105.7	37		0.00087963	117
	0.000868056	83.2	117.6	56.3	106.2	37		0.000891204	119
	0.00087963	83.4	117.9	56.5	106.7	37		0.000902778	119
	0.000891204	83.6	118.2	56.7	107.3	37.1		0.000914352	120
	0.000914352	83.8	118.6	56.9	107.6	37.1		0.000925926	120
	0.000925926	83.9	118.8	57.1	107.9	37.1		0.0009375	119
	0.0009375	84.1	119.1	57.3	108.3	37.1		0.000949074	120
	0.000949074	84.3	119.4	57.5	108.6	37.2		0.000960648	120
	0.000960648	84.5	119.6	57.6	108.8	37.2		0.000972222	119
	0.000972222	84.7	119.8	57.8	108	37.2		0.000983796	118
	0.000983796	84.8	120	58	108.3	37.2		0.00099537	119
	0.00099537	85	120.3	58.2	108.9	37.3		0.00100694	119
	0.00100694	85.1	120.5	58.3	109.3	37.3		0.00101852	118
	0.00101852	85.3	120.7	58.5	109.7	37.3		0.00103009	119
	0.00103009	85.4	120.9	58.6	109.8	37.3		0.00104167	118
	0.00104167	85.6	121.1	58.8	109.7	37.3		0.00105324	118
	0.00105324	85.8	121.2	58.9	109.6	37.4		0.00106481	119
	0.00106481	86	121.4	59	109.2	37.4		0.00107639	119
	0.00107639	86.1	121.5	59.2	109.1	37.4		0.00108796	118
	0.00108796	86.2	121.6	59.3	109.1	37.4		0.00109954	118
	0.00109954	86.3	121.6	59.4	109.1	37.4		0.00111111	118
	0.00111111	86.4	121.7	59.5	109.2	37.5		0.00112269	118
	0.00112269	86.5	121.9	59.6	109.3	37.5		0.00113426	117
	0.00113426	86.6	122.1	59.8	109.3	37.5		0.00114583	117
	0.00114583	86.7	122.4	59.9	109.2	37.5		0.00115741	116
	0.00115741	86.8	122.6	60	108.7	37.5		0.00116898	116
	0.00118056	86.9	122.8	60.1	107.8	37.5		0.00118056	115
	0.0012037	87.1	123.1	60.4	106.9	37.6		0.00119213	116
	0.00121528	87.2	123.3	60.5	106.6	37.6		0.0012037	116
	0.00122685	87.2	123.3	60.6	106.4	37.6		0.00121528	116
	0.00123843	87.3	123.3	60.7	106.4	37.7		0.00122685	115
	0.00125	87.4	123.3	60.8	106.3	37.7		0.00123843	114
	0.00126157	87.5	123.4	60.9	106.3	37.7		0.00125	113
	0.00127315	87.5	123.5	61	106.4	37.7		0.00126157	113
	0.00128472	87.6	123.6	61.1	106.5	37.8		0.00127315	113
	0.0012963	87.7	123.8	61.2	106.6	37.8		0.00128472	112
	0.00130787	87.7	123.9	61.3	106.8	37.8		0.0012963	111
	0.00131944	87.8	124	61.4	106.9	37.8		0.00130787	111
	0.00133102	87.9	124.1	61.5	107	37.8		0.00131944	111
	0.00134259	87.9	124.3	61.6	106.9	37.9		0.00133102	110
	0.00135417	88	124.4	61.7	106.7	37.9		0.00134259	110
	0.00136574	88.1	124.7	61.8	106.7	37.9		0.00135417	109
	0.00137731	88.1	124.9	61.9	106.7	37.9		0.00136574	109
	0.00138889	88.2	125.1	62	106.8	37.9		0.00137731	109
	0.00140046	88.3	125.2	62.1	106.9	38		0.00138889	109
	0.00141204	88.3	125.3	62.2	106.9	38		0.00140046	109
	0.00142361	88.4	125.5	62.3	106.9	38		0.00141204	109
	0.00143519	88.4	125.6	62.4	106.9	38		0.00142361	108
	0.00144676	88.5	125.7	62.5	106.7	38.1		0.00143519	108
	0.00145833	88.5	125.8	62.5	106.6	38.1		0.00144676	108
	0.00148148	88.6	125.9	62.6	106.5	38.1		0.00145833	108
	0.00149306	88.7	126	62.7	106.5	38.1		0.00146991	108
	0.00150463	88.7	126.2	62.8	106.4	38.2		0.00148148	107
	0.0015162	88.8	126.3	62.9	106.5	38.1		0.00149306	107
	0.00152778	88.9	126.4	63	106.7	38.2		0.00150463	107
	0.00153935	89	126.5	63.1	106.8	38.2		0.0015162	107
	0.00155093	89	126.7	63.1	106.9	38.2		0.00152778	107
	0.0015625	89	126.8	63.2	106.9	38.2		0.00153935	106
	0.00157407	89.1	126.9	63.3	106.6	38.3		0.00155093	106
	0.00158565	89.1	127	63.4	106.6	38.3		0.0015625	106
	0.00159722	89.2	127.2	63.5	106.6	38.3		0.00157407	106
	0.0016088	89.3	127.5	63.6	106.8	38.3		0.00158565	106
	0.00162037	89.3	127.7	63.7	106.5	38.3		0.00159722	106
	0.00163194	89.4	128	63.8	106.5	38.3		0.0016088	106
	0.00164352	89.5	128	63.8	106.3	38.4		0.00162037	106
	0.00165509	89.5	128	63.9	105.6	38.4		0.00163194	106
	0.00166667	89.5	128.2	64	104.1	38.4		0.00164352	106
	0.00168981	89.6	128.3	64	104	38.4		0.00165509	106
	0.00170139	89.6	128.5	64.1	104.3	38.5		0.00166667	106
	0.00171296	89.7	128.7	64.2	105.3	38.4		0.00167824	106
	0.00172454	89.8	128.7	64.3	106.7	38.5		0.00168981	106
	0.00173611	89.8	128.8	64.4	108.1	38.5		0.00170139	106
	0.00174769	89.9	129	64.4	109	38.5		0.00171296	106
	0.00175926	89.9	129.2	64.6	109.4	38.5		0.00172454	106
	0.00177083	90	129.4	64.6	110.1	38.6		0.00173611	106
	0.00178241	90	129.7	64.7	111	38.6		0.00174769	105
	0.00179398	90.1	130	64.8	111.4	38.6		0.00175926	105
	0.00181713	90.1	130	64.9	111.8	38.7		0.00177083	105
	0.0018287	90.1	130	64.9	111.9	38.7		0.00178241	105
	0.00184028	90.2	129.9	65	111.9	38.7		0.00179398	106
	0.00185185	90.2	130	65.1	112	38.7		0.00180556	106
	0.00186343	90.3	130.2	65.2	112.3	38.7		0.00181713	106
	0.001875	90.3	130.4	65.2	112.5	38.8		0.0018287	106
	0.00188657	90.3	130.5	65.3	112.6	38.8		0.00184028	106
	0.00189815	90.4	130.6	65.4	112.9	38.8		0.00185185	107
	0.00190972	90.4	130.7	65.5	112.9	38.8		0.00186343	107
	0.0019213	90.4	130.9	65.5	113	38.8		0.001875	107
	0.00194444	90.5	131	65.6	113	38.9		0.00188657	106
	0.00195602	90.5	131.2	65.6	113	38.9		0.00189815	106
	0.00196759	90.6	131.3	65.7	112.8	38.9		0.00190972	106
	0.00197917	90.6	131.4	65.8	112.9	38.9		0.0019213	106
	0.00199074	90.6	131.4	65.8	112.9	38.9		0.00193287	106
	0.00200231	90.7	131.6	65.9	113.1	38.9		0.00194444	105
	0.00201389	90.7	131.7	66	113.5	39		0.00195602	105
	0.00202546	90.7	131.8	66	113.8	39		0.00196759	105
	0.00203704	90.8	131.8	66.1	113.9	39		0.00197917	105
	0.00204861	90.8	131.9	66.1	114	39		0.00199074	105
	0.00206019	90.8	132	66.2	113.9	39		0.00200231	105
	0.00207176	90.9	132	66.3	113.9	39.1		0.00201389	105
	0.00208333	90.9	132.1	66.3	113.9	39.1		0.00202546	105
	0.00209491	91	132.1	66.4	113.9	39.1		0.00203704	104
	0.00210648	91	132.2	66.5	113.7	39.1		0.00204861	104
	0.00211806	91	132.2	66.5	113.5	39.1		0.00206019	105
	0.00212963	91.1	132.3	66.6	113.3	39.1		0.00207176	105
	0.00215278	91.1	132.3	66.6	113	39.1		0.00208333	105
	0.00216435	91.1	132.4	66.7	112.9	39.1		0.00209491	104
	0.00217593	91.1	132.5	66.8	112.7	39.1		0.00210648	105
	0.0021875	91.2	132.5	66.8	112.6	39.2		0.00211806	105
	0.00219907	91.3	132.6	66.9	112.6	39.2		0.00212963	105
	0.00221065	91.3	132.6	67	112.4	39.2		0.0021412	104
	0.00222222	91.3	132.7	67	112.4	39.2		0.00215278	104
	0.0022338	91.3	132.8	67.1	112.4	39.2		0.00216435	104
	0.00224537	91.4	132.9	67.1	112.1	39.2		0.00217593	104
	0.00225694	91.4	132.9	67.2	107.7	39.2		0.0021875	104
	0.00226852	91.5	133	67.3	106.4	39.3		0.00219907	104
	0.00228009	91.5	133.4	67.3	106.5	39.3		0.00221065	104
	0.00229167	91.5	133.9	67.4	107.4	39.3		0.00222222	104
	0.00230324	91.6	134.5	67.4	109	39.3		0.0022338	104
	0.00231481	91.6	135	67.5	110.2	39.3		0.00224537	103
	0.00232639	91.6	135.5	67.6	111.1	39.3		0.00225694	104
	0.00233796	91.6	136	67.6	111.7	39.3		0.00226852	103
	0.00234954	91.6	136.5	67.7	111.9	39.3		0.00228009	103
	0.00236111	91.6	137.1	67.8	111.8	39.3		0.00229167	103
	0.00237269	91.6	137.7	67.8	111.8	39.4		0.00230324	103
	0.00238426	91.6	137.9	67.9	111.7	39.4		0.00231481	103
	0.00239583	91.6	138.1	67.9	111.4	39.4		0.00232639	102
	0.00241898	91.7	138.4	68	110.8	39.4		0.00233796	104
	0.00243056	91.6	138.6	68.1	110.6	39.4		0.00234954	103
	0.00244213	91.7	138.7	68.1	110.4	39.4		0.00236111	103
	0.0024537	91.7	138.9	68.2	110.3	39.4		0.00237269	104
	0.00246528	91.7	139	68.3	110.3	39.4		0.00238426	104
	0.00247685	91.7	139.1	68.3	110.2	39.4		0.00239583	103
	0.00248843	91.7	139	68.4	110.2	39.4		0.00240741	103
	0.0025	91.8	138.7	68.4	110.3	39.5		0.00241898	104
	0.00251157	91.8	138.1	68.5	110.3	39.5		0.00243056	104
	0.00252315	91.8	137.7	68.6	110.4	39.5		0.00244213	104
	0.00253472	91.8	137.4	68.7	110.3	39.5		0.0024537	103
	0.0025463	91.9	137.2	68.7	110.2	39.5		0.00246528	103
	0.00255787	91.9	137	68.8	110.2	39.5		0.00247685	103
	0.00256944	91.9	136.9	68.8	110.2	39.5		0.00248843	103
	0.00258102	91.9	136.8	68.9	110.1	39.5		0.0025	103
	0.00259259	92	136.7	69	109.7	39.5		0.00251157	103
	0.00260417	92	136.6	69	109.4	39.6		0.00252315	103
	0.00261574	92	136.6	69.1	109.1	39.6		0.00253472	103
	0.00262731	92.1	136.5	69.2	108.9	39.6		0.0025463	102
	0.00263889	92.1	136.4	69.3	108.9	39.6		0.00255787	102
	0.00265046	92.1	136.3	69.3	108.7	39.6		0.00256944	102
	0.00266204	92.2	136.2	69.4	108.3	39.6		0.00258102	102
	0.00268519	92.2	136.1	69.5	108	39.6		0.00259259	102
	0.00269676	92.2	136.1	69.5	107.9	39.7		0.00260417	102
	0.00270833	92.2	136	69.6	107.3	39.7		0.00261574	102
	0.00271991	92.3	135.9	69.7	106.8	39.7		0.00262731	102
	0.00273148	92.3	135.8	69.7	106.6	39.7		0.00263889	102
	0.00274306	92.4	135.8	69.8	106.5	39.7		0.00265046	102
	0.00275463	92.4	135.7	69.8	106.2	39.7		0.00266204	102
	0.0027662	92.4	135.6	69.9	105.9	39.7		0.00267361	102
	0.00277778	92.5	135.6	70	104.7	39.7		0.00268519	102
	0.00278935	92.5	135.7	70.1	103.2	39.7		0.00269676	102
	0.00280093	92.5	135.9	70.2	102.8	39.8		0.00270833	102
	0.0028125	92.5	136.1	70.2	103	39.8		0.00271991	102
	0.00282407	92.6	136.2	70.3	103.5	39.8		0.00273148	102
	0.00283565	92.6	136.5	70.3	105.1	39.8		0.00274306	102
	0.0028588	92.7	136.5	70.4	106.2	39.8		0.00275463	102
	0.00287037	92.7	136.6	70.5	107.2	39.8		0.0027662	102
	0.00288194	92.7	136.7	70.5	107.8	39.8		0.00277778	102
	0.00289352	92.7	136.7	70.6	107.4	39.8		0.00278935	101
	0.00290509	92.8	136.6	70.7	107.8	39.9		0.00280093	101
	0.00291667	92.8	136.5	70.7	108.5	39.9		0.0028125	102
	0.00292824	92.8	136.5	70.8	109.1	39.9		0.00282407	102
	0.00293981	92.9	136.3	70.9	109.6	39.9		0.00283565	102
	0.00295139	92.9	136.2	71	109.8	39.9		0.00284722	102
	0.00296296	92.9	136.2	71	109.8	39.9		0.0028588	102
	0.00297454	92.9	136.1	71.1	109.8	39.9		0.00287037	102
	0.00298611	92.9	136.1	71.2	109.8	39.9		0.00288194	102
	0.00299769	92.9	136.1	71.2	110	40		0.00289352	102
	0.00300926	92.9	136	71.3	110.4	39.9		0.00290509	102
	0.00302083	92.8	136	71.4	109.8	40		0.00291667	102
	0.00303241	92.8	135.9	71.5	108.7	40		0.00292824	102
	0.00304398	92.8	135.9	71.6	108.4	40		0.00293981	102
	0.00305556	92.8	136.2	71.6	108.4	40		0.00295139	102
	0.00306713	92.8	136.4	71.7	108.4	40		0.00296296	102
	0.0030787	92.8	136.7	71.8	108.5	40		0.00297454	102
	0.00309028	92.8	136.9	71.9	108.6	40		0.00298611	102
	0.00311343	92.9	137.3	72	108.2	40		0.00299769	102
	0.003125	92.9	137.6	72.1	107.4	40		0.00300926	102
	0.00313657	92.9	137.9	72.2	107.1	40.1		0.00302083	103
	0.00314815	92.9	138.2	72.3	107.3	40.1		0.00303241	102
	0.00315972	93	138.5	72.4	107.6	40.1		0.00304398	102
	0.0031713	93.1	138.8	72.5	107.5	40.1		0.00305556	102
	0.00318287	93.1	138.9	72.6	107.2	40.1		0.00306713	102
	0.00319444	93.1	139.1	72.7	106.4	40.1		0.0030787	102
	0.00320602	93.2	139.2	72.8	106.5	40.1		0.00309028	101
	0.00321759	93.2	139.4	72.9	106.7	40.1		0.00310185	101
	0.00322917	93.3	139.5	73	107	40.1		0.00311343	101
	0.00324074	93.3	139.8	73.1	107.1	40.2		0.003125	102
	0.00325231	93.4	140.1	73.1	107.2	40.2		0.00313657	102
	0.00326389	93.4	140.3	73.2	107.2	40.2		0.00314815	102
	0.00327546	93.5	140.6	73.4	107.3	40.2		0.00315972	102
	0.00328704	93.5	141	73.4	107.8	40.2		0.0031713	102
	0.00329861	93.6	141.2	73.5	108.1	40.2		0.00318287	102
	0.00331019	93.5	141.5	73.6	108.2	40.2		0.00319444	102
	0.00332176	93.6	141.6	73.7	107.7	40.2		0.00320602	102
	0.00333333	93.6	141.7	73.8	107.5	40.3		0.00321759	102
	0.00334491	93.7	141.8	73.9	107.1	40.3		0.00322917	103
	0.00336806	93.7	141.9	74	102.4	40.3		0.00324074	102
	0.00337963	93.8	142.2	74.1	102.4	40.3		0.00325231	102
	0.0033912	93.8	142.5	74.1	102.7	40.3		0.00326389	102
	0.00340278	93.9	142.7	74.2	103.1	40.4		0.00327546	103
	0.00341435	93.9	143	74.3	103.4	40.4		0.00328704	103
	0.00342593	94	143.4	74.4	105.1	40.4		0.00329861	103
	0.0034375	94	143.6	74.5	105.9	40.4		0.00331019	103
	0.00344907	94.1	143.9	74.6	106.7	40.4		0.00332176	103
	0.00346065	94.1	144.1	74.7	107.5	40.4		0.00333333	103
	0.00347222	94.2	144.3	74.8	108.6	40.5		0.00334491	104
	0.0034838	94.2	144.5	74.8	108.9	40.5		0.00335648	104
	0.00349537	94.2	144.8	74.9	107.5	40.5		0.00336806	104
	0.00350694	94.3	144.9	75	106.9	40.5		0.00337963	104
	0.00351852	94.3	145	75.1	107.5	40.5		0.0033912	104
	0.00354167	94.4	145.1	75.2	108.8	40.5		0.00340278	104
	0.00355324	94.4	145.2	75.3	109.6	40.5		0.00341435	104
	0.00356481	94.4	145.3	75.4	109.6	40.5		0.00342593	103
	0.00357639	94.5	145.4	75.4	109.5	40.6		0.0034375	104
	0.00358796	94.5	145.6	75.5	108.9	40.6		0.00344907	104
	0.00359954	94.6	145.8	75.6	108	40.6		0.00346065	105
	0.00361111	94.6	146	75.7	107.7	40.6		0.00347222	105
	0.00362269	94.6	146.2	75.8	107.6	40.6		0.0034838	105
	0.00363426	94.7	146.4	75.8	107.4	40.7		0.00349537	105
	0.00364583	94.7	146.6	76	107.2	40.7		0.00350694	104
	0.00365741	94.8	146.7	76	107.2	40.8		0.00351852	105
	0.00366898	94.8	146.8	76.1	107.6	40.8		0.00353009	105
	0.00368056	94.8	146.9	76.2	108.8	40.8		0.00354167	105
	0.00369213	94.9	146.9	76.2	109.6	40.8		0.00355324	104
	0.0037037	94.9	147	76.3	110.3	40.8		0.00356481	104
	0.00371528	95	147	76.4	110.9	40.8		0.00357639	104
	0.00372685	95	147	76.4	110.9	40.8		0.00358796	105
	0.00373843	95.1	147.1	76.5	110.1	40.9		0.00359954	104
	0.00376157	95.1	147.1	76.6	108.7	40.9		0.00361111	105
	0.00377315	95.2	147.1	76.7	109.1	40.9		0.00362269	105
	0.00378472	95.3	147.2	76.7	109.6	40.9		0.00363426	104
	0.00380787	95.3	147.6	76.9	108.8	41		0.00364583	104
	0.00381944	95.3	147.8	76.9	108.2	41		0.00365741	105
	0.00383102	95.3	148	77	106.4	41		0.00366898	105
	0.00384259	95.4	148.2	77.1	105.8	41		0.00368056	105
	0.00385417	95.4	148.4	77.2	106.1	41		0.00369213	105
	0.00386574	95.5	148.7	77.2	107.2	41.1		0.0037037	105
	0.00387731	95.5	148.8	77.3	106.5	41.1		0.00371528	105
	0.00388889	95.6	149	77.4	104.9	41.1		0.00372685	105
	0.00390046	95.6	149.3	77.4	105.2	41.1		0.00373843	105
	0.00391204	95.6	149.4	77.5	105.1	41.1		0.00375	105
	0.00392361	95.7	149.2	77.6	104.8	41.1		0.00376157	105
	0.00393519	95.7	149	77.6	104.7	41.2		0.00377315	106
	0.00394676	95.8	148.9	77.7	104.9	41.2		0.00378472	106
	0.00395833	95.8	148.8	77.8	103.2	41.2		0.0037963	105
	0.00396991	95.8	148.7	77.8	103.4	41.2		0.00380787	104
	0.00399306	95.9	148.5	77.9	103.5	41.3		0.00381944	104
	0.00400463	95.9	148.2	78	104.6	41.3		0.00383102	105
	0.00402778	96	148.1	78.1	105.7	41.3		0.00384259	105
	0.00403935	96	148	78.2	104.9	41.4		0.00385417	104
	0.00405093	96	147.9	78.2	103	41.4		0.00386574	104
	0.0040625	96.1	147.7	78.3	103.5	41.4		0.00387731	104
	0.00407407	96.1	147.6	78.4	103.6	41.4		0.00388889	104
	0.00408565	96.1	147.5	78.4	104.1	41.5		0.00390046	104
	0.00409722	96.2	147.4	78.5	105.5	41.5		0.00391204	105
	0.0041088	96.2	147.3	78.6	105.1	41.5		0.00392361	105
	0.00412037	96.3	147.2	78.7	104.2	41.5		0.00393519	106
	0.00413194	96.3	147.1	78.7	103.9	41.6		0.00394676	104
	0.00414352	96.3	147	78.8	103.4	41.6		0.00395833	104
	0.00415509	96.4	146.9	78.9	103.8	41.6		0.00396991	105
	0.00416667	96.5	146.9	78.9	103.8	41.6		0.00398148	105
	0.00417824	96.5	146.8	79	104.2	41.7		0.00399306	105
	0.00418981	96.6	146.8	79	104.9	41.7		0.00400463	106
	0.00421296	96.6	146.8	79.1	103.9	41.7		0.0040162	106
	0.00422454	96.7	146.8	79.2	102.9	41.8		0.00402778	106
	0.00424769	96.5	146.7	79.3	102.2	41.8		0.00403935	105
	0.00425926	96.5	146.7	79.4	102	41.8		0.00405093	106
	0.00427083	96.5	146.6	79.4	102.1	41.8		0.0040625	106
	0.00428241	96.6	146.7	79.5	102.2	41.9		0.00407407	106
	0.00429398	96.6	146.7	79.5	102.3	41.9		0.00408565	106
	0.00430556	96.7	146.6	79.6	102.6	41.9		0.00409722	106
	0.00431713	96.7	146.4	79.7	103	41.9		0.0041088	106
	0.0043287	96.7	146.3	79.7	103.3	42		0.00412037	106
	0.00434028	96.8	146.2	79.8	104.1	42		0.00413194	106
	0.00435185	96.8	146.1	79.9	103.7	42.1		0.00414352	106
	0.00436343	96.9	145.9	79.9	102.4	42.1		0.00415509	106
	0.004375	96.9	145.8	79.9	102.2	42.1		0.00416667	106
	0.00438657	96.9	145.6	80	102.3	42.2		0.00417824	106
	0.00439815	96.9	145.4	80	101.9	42.2		0.00418981	104
	0.00440972	97	145.3	80.1	102.2	42.2		0.00420139	105
	0.0044213	97	145.2	80.2	102.5	42.2		0.00421296	105
	0.00443287	97	145	80.2	102.5	42.2		0.00422454	105
	0.00445602	97.1	144.9	80.3	102.7	42.3		0.00423611	105
	0.00446759	97.1	144.8	80.3	103.1	42.3		0.00424769	105
	0.00447917	97.1	144.6	80.4	103.7	42.3		0.00425926	105
	0.00449074	97.1	144.5	80.4	102.7	42.3		0.00427083	105
	0.00450231	97.2	144.3	80.5	102.6	42.4		0.00428241	105
	0.00451389	97.2	144.1	80.5	102.9	42.4		0.00429398	105
	0.00452546	97.2	143.9	80.6	103.1	42.4		0.00430556	105
	0.00453704	97.3	143.8	80.6	103	42.4		0.00431713	105
	0.00454861	97.3	143.8	80.7	102.5	42.5		0.0043287	106
	0.00456019	97.4	143.6	80.8	102.5	42.5		0.00434028	106
	0.00457176	97.4	143.4	80.8	102.5	42.6		0.00435185	106
	0.00458333	97.5	143.2	80.9	102.4	42.6		0.00436343	106
	0.00459491	97.5	143.1	81	102	42.6		0.004375	106
	0.00460648	97.5	143	81	101.9	42.7		0.00438657	105
	0.00461806	97.5	142.7	81.1	101.9	42.7		0.00439815	105
	0.00462963	97.6	142.6	81.2	101.8	42.7		0.00440972	105
	0.0046412	97.6	142.5	81.2	101.9	42.7		0.0044213	106
	0.00465278	97.6	142.3	81.2	101.9	42.8		0.00443287	106
	0.00466435	97.6	142.2	81.3	102	42.8		0.00444444	105
	0.0046875	97.7	142.2	81.4	102.3	42.8		0.00445602	106
	0.00471065	97.8	141.8	81.5	102.6	42.9		0.00446759	106
	0.00472222	97.8	141.2	81.5	102.3	43		0.00447917	107
	0.0047338	97.8	141.5	81.6	102.1	43		0.00449074	106
	0.00474537	97.9	141.5	81.7	102.1	43.1		0.00450231	107
	0.00475694	98	141.4	81.7	102	43.1		0.00451389	107
	0.00476852	98	140.7	81.8	102	43.1		0.00452546	108
	0.00478009	98	140.3	81.8	101.8	43.2		0.00453704	108
	0.00479167	98	140.3	81.9	101.6	43.2		0.00454861	107
	0.00480324	98.1	140.3	81.9	101.6	43.3		0.00456019	106
	0.00481481	98.2	140.1	81.9	101.6	43.4		0.00457176	107
	0.00482639	98.2	140	82	101.6	43.4		0.00458333	107
	0.00483796	98.2	139.9	82	101.6	43.4		0.00459491	107
	0.00484954	98.3	139.9	82.1	101.5	43.5		0.00460648	107
	0.00486111	98.3	139.6	82.1	101.5	43.5		0.00461806	108
	0.00487269	98.4	139.6	82.1	101.5	43.6		0.00462963	108
	0.00488426	98.4	139.5	82.2	101.6	43.6		0.0046412	108
	0.00489583	98.4	138.8	82.2	101.5	43.7		0.00465278	107
	0.00490741	98.5	139	82.2	101.5	43.7		0.00466435	107
	0.00491898	98.5	138.9	82.2	101.5	43.8		0.00467593	108
	0.00493056	98.6	138.9	82.3	101.6	43.8		0.0046875	107
	0.00494213	98.6	138.8	82.3	101.7	43.8		0.00469907	108
	0.0049537	98.6	138.7	82.3	101.7	43.9		0.00471065	108
	0.00496528	98.6	138.6	82.4	101.9	43.9		0.00472222	108
	0.00497685	98.7	138.6	82.4	102	44		0.0047338	108
	0.005	98.7	138.5	82.5	102	44		0.00474537	109
	0.00501157	98.7	138.4	82.5	101.9	44.1		0.00475694	109
	0.00502315	98.7	138.1	82.5	101.8	44.2		0.00476852	109
	0.00503472	98.8	137.9	82.6	101.9	44.2		0.00478009	109
	0.0050463	98.8	137.9	82.6	101.9	44.3		0.00479167	109
	0.00505787	98.9	137.9	82.6	101.5	44.3		0.00480324	109
	0.00506944	98.9	137.7	82.7	101.4	44.3		0.00481481	110
	0.00508102	98.9	137.6	82.7	101.4	44.3		0.00482639	109
	0.00509259	98.9	137.5	82.7	101.4	44.4		0.00483796	109
	0.00510417	99	137.4	82.7	101.4	44.5		0.00484954	108
	0.00511574	98.9	137.4	82.8	101.4	44.5		0.00486111	109
	0.00512731	98.9	137.4	82.9	101.6	44.5		0.00487269	110
	0.00513889	98.9	137.4	82.8	101.7	44.6		0.00488426	111
	0.00515046	98.9	137.5	82.9	101.6	44.7		0.00489583	111
	0.00516204	98.9	137.6	82.9	101.6	44.7		0.00490741	111
	0.00517361	99	137.7	83	101.7	44.7		0.00491898	111
	0.00518519	99.1	137.7	83	101.7	44.8		0.00493056	111
	0.00520833	99.1	137.9	83.1	101.7	44.8		0.00494213	111
	0.00521991	99.1	137.9	83.1	101.8	44.9		0.0049537	111
	0.00523148	99.1	137.9	83.1	101.8	44.9		0.00496528	111
	0.00524306	99.1	137.9	83.2	101.8	45		0.00497685	111
	0.00525463	99.1	138	83.2	101.9	45		0.00498843	112
	0.0052662	99.1	138	83.2	101.9	45.1		0.005	110
	0.00527778	99.2	138	83.3	101.8	45.1		0.00501157	112
	0.00528935	99.2	138	83.4	101.6	45.2		0.00502315	112
	0.00530093	99.2	138.1	83.4	101.5	45.3		0.00503472	112
	0.0053125	99.3	138.2	83.5	101.5	45.3		0.0050463	113
	0.00532407	99.3	138.3	83.5	101.6	45.4		0.00505787	113
	0.00533565	99.3	138.5	83.6	101.6	45.4		0.00506944	112
	0.00534722	99.3	138.7	83.6	101.7	45.5		0.00508102	112
	0.0053588	99.4	138.8	83.6	101.7	45.5		0.00509259	112
	0.00537037	99.4	138.9	83.7	101.7	45.5		0.00510417	112
	0.00538194	99.4	138.9	83.7	101.8	45.6		0.00511574	114
	0.00540509	99.4	138.8	83.8	101.6	45.6		0.00512731	112
	0.00541667	99.5	138.8	83.8	101.7	45.7		0.00513889	112
	0.00542824	99.5	138.8	83.9	101.6	45.7		0.00515046	112
	0.00543981	99.5	138.9	83.9	101.6	45.8		0.00516204	112
	0.00545139	99.5	139.1	84	101.5	45.8		0.00517361	113
	0.00546296	99.5	139.2	84	101.6	45.9		0.00518519	113
	0.00547454	99.6	139.2	84.1	101.6	45.9		0.00519676	113
	0.00548611	99.6	139.2	84.1	101.6	46		0.00520833	114
	0.00549769	99.6	139	84.1	101.4	46.1		0.00521991	114
	0.00550926	99.6	138.9	84.2	101.4	46.2		0.00523148	114
	0.00552083	99.7	138.9	84.2	101.4	46.2		0.00524306	114
	0.00553241	99.7	138.7	84.2	101.6	46.2		0.00525463	114
	0.00554398	99.7	138.4	84.3	101.6	46.3		0.0052662	115
	0.00556713	99.7	137.8	84.3	101.4	46.4		0.00527778	115
	0.0055787	99.7	137.7	84.4	101.4	46.4		0.00528935	115
	0.00559028	99.8	137.5	84.4	101.7	46.5		0.00530093	114
	0.00560185	99.7	137.3	84.5	101.9	46.4		0.0053125	115
	0.00561343	99.7	137.2	84.5	101.6	46.5		0.00532407	115
	0.005625	99.8	137.1	84.5	101.5	46.6		0.00533565	115
	0.00563657	99.8	137.1	84.5	101.6	46.7		0.00534722	116
	0.00564815	99.8	137.1	84.6	101.4	46.7		0.0053588	116
	0.00565972	99.8	137.1	84.6	101.7	46.8		0.00537037	116
	0.0056713	99.8	137.1	84.6	101.6	46.8		0.00538194	116
	0.00568287	99.8	137.1	84.7	101.5	46.9		0.00539352	116
	0.00569444	99.8	137	84.7	101.4	47		0.00540509	117
	0.00570602	99.9	137	84.7	101.4	47		0.00541667	118
	0.00571759	99.9	136.7	84.8	101.3	47		0.00542824	118
	0.00572917	99.9	136.6	84.8	101.3	47		0.00543981	117
	0.00574074	99.9	136.4	84.8	101.2	47.1		0.00545139	117
	0.00575231	99.9	135.9	84.9	101.2	47.2		0.00546296	117
	0.00576389	99.9	135.7	84.9	101.3	47.2		0.00547454	118
	0.00577546	99.9	135.3	84.9	101.3	47.3		0.00548611	118
	0.00578704	100	135.3	85	101.2	47.3		0.00549769	118
	0.00579861	100	135.3	85	101.2	47.4		0.00550926	119
	0.00581019	100	135.1	85.1	101.2	47.5		0.00552083	119
	0.00583333	100	134.9	85.1	101.1	47.5		0.00553241	118
	0.00584491	100.1	134.3	85.1	101.3	47.6		0.00554398	119
	0.00585648	100.1	134.1	85.2	101.3	47.6		0.00555556	119
	0.00586806	100.1	134.2	85.2	101.3	47.7		0.00556713	120
	0.00587963	100.1	134.1	85.3	101.3	47.7		0.0055787	120
	0.00590278	100.1	134.1	85.3	101.2	47.7		0.00559028	120
	0.00591435	100.1	134.2	85.4	101.2	47.8		0.00560185	120
	0.00592593	100.1	134.2	85.5	101.7	47.9		0.00561343	118
	0.0059375	100.1	134.1	85.5	101.5	47.9		0.005625	119
	0.00594907	100.2	134.2	85.6	101.3	47.9		0.00563657	119
	0.00596065	100.2	134.3	85.6	101.3	47.9		0.00564815	119
	0.00597222	100.2	134.3	85.6	101.3	48.1		0.00565972	118
	0.0059838	100.2	134.1	85.7	101.3	48.1		0.0056713	119
	0.00599537	100.2	134.2	85.8	101.2	48.1		0.00568287	119
	0.00600694	100.2	134.4	85.8	101.1	48.1		0.00569444	119
	0.00601852	100.2	134.4	85.8	101.1	48.2		0.00570602	120
	0.00603009	100.2	134.3	85.8	101.1	48.3		0.00571759	120
	0.00604167	100.2	134.3	85.9	101.1	48.4		0.00572917	120
	0.00605324	100.2	134.3	85.9	101.1	48.4		0.00574074	120
	0.00606481	100.2	134.4	86	101.2	48.5		0.00575231	120
	0.00607639	100.2	134.2	86	101.1	48.5		0.00576389	119
	0.00608796	100.2	134.1	86.1	101.2	48.6		0.00577546	120
	0.00609954	100.3	134	86.1	101.1	48.7		0.00578704	119
	0.00611111	100.3	134	86.1	101.1	48.8		0.00579861	120
	0.00612269	100.3	133.9	86.1	101	48.8		0.00581019	121
	0.00613426	100.3	133.8	86.2	101.1	48.8		0.00582176	121
	0.00615741	100.3	133.7	86.2	101.1	48.9		0.00583333	121
	0.00616898	100.3	133.6	86.3	101.1	49		0.00584491	121
	0.00618056	100.4	133.5	86.3	101.2	49.1		0.00585648	122
	0.00619213	100.3	133.5	86.3	101.2	49.1		0.00586806	122
	0.0062037	100.4	133.4	86.3	101.2	49.1		0.00587963	122
	0.00621528	100.4	133.2	86.4	101.2	49.2		0.0058912	121
	0.00622685	100.4	133	86.4	101.3	49.2		0.00590278	122
	0.00623843	100.4	133	86.4	101.3	49.3		0.00591435	119
	0.00625	100.4	132.8	86.5	101.2	49.3		0.00592593	119
	0.00626157	100.4	132.7	86.5	101.3	49.5		0.0059375	121
	0.00627315	100.4	132.6	86.5	101.4	49.5		0.00594907	121
	0.00628472	100.4	132.4	86.5	101.3	49.5		0.00596065	121
	0.0062963	100.4	132.4	86.5	101.2	49.5		0.00597222	120
	0.00630787	100.4	132.6	86.6	101.3	49.6		0.0059838	122
	0.00631944	100.4	132.7	86.6	101.3	49.6		0.00599537	118
	0.00633102	100.4	132.9	86.6	101.3	49.6		0.00600694	121
	0.00634259	100.4	132.8	86.7	101.2	49.7		0.00601852	122
	0.00635417	100.4	132.7	86.7	101.2	49.7		0.00603009	122
	0.00636574	100.5	131.9	86.7	101.3	50		0.00604167	119
	0.00637731	100.5	131.1	86.8	101.4	50		0.00605324	121
	0.00638889	100.5	131.8	86.8	101.4	50		0.00606481	121
	0.00640046	100.5	132.4	86.8	101.4	50		0.00607639	121
	0.00641204	100.5	132.6	86.8	101.5	50		0.00608796	120
	0.00642361	100.4	133	86.8	101.4	50		0.00609954	120
	0.00643519	100.5	133.4	86.8	101.3	50.1		0.00611111	120
	0.00644676	100.5	133.5	86.8	101.2	50.2		0.00612269	121
	0.00645833	100.5	133.7	86.8	101.1	50.2		0.00613426	121
	0.00646991	100.5	133.3	86.8	101.2	50.3		0.00614583	121
	0.00648148	100.4	133.5	86.9	101.2	50.3		0.00615741	121
	0.00649306	100.5	133.7	86.9	101.3	50.5		0.00616898	122
	0.0065162	100.5	133.6	86.9	101.5	50.4		0.00618056	122
	0.00652778	100.5	133.4	87	101.3	50.4		0.00619213	123
	0.00653935	100.4	133.5	87	101.2	50.4		0.0062037	122
	0.00655093	100.4	133.3	87	101.1	50.4		0.00621528	122
	0.0065625	100.4	132.4	87	101.1	50.5		0.00622685	123
	0.00657407	100.5	131.5	87	101.2	50.5		0.00623843	123
	0.00658565	100.4	131.1	87.1	101.2	50.5		0.00625	124
	0.00659722	100.4	131.6	87.1	101.2	50.5		0.00626157	124
	0.0066088	100.4	132.8	87.1	101.2	50.5		0.00627315	124
	0.00662037	100.4	133.2	87.1	101.3	50.5		0.00628472	124
	0.00663194	100.4	131.7	87.1	101.2	50.5		0.0062963	124
	0.00664352	100.4	131.2	87.1	101.2	50.5		0.00630787	125
	0.00665509	100.4	130.8	87.1	101.2	50.6		0.00631944	125
	0.00666667	100.5	130.6	87.2	101.2	50.6		0.00633102	123
	0.00667824	100.4	131	87.2	101.3	50.7		0.00634259	125
	0.00670139	100.4	132.2	87.3	101.2	50.7		0.00635417	125
	0.00671296	100.4	132.8	87.3	101.2	50.7		0.00636574	125
	0.00672454	100.4	133.3	87.3	101.2	50.8		0.00637731	125
	0.00673611	100.4	133.7	87.3	101.2	50.9		0.00638889	125
	0.00674769	100.5	133.9	87.3	101.1	50.9		0.00640046	125
	0.00675926	100.5	134	87.4	101.1	51		0.00641204	125
	0.00677083	100.4	134.1	87.4	101.2	51		0.00642361	125
	0.00678241	100.4	134.3	87.4	101.2	51		0.00643519	122
	0.00679398	100.4	134.8	87.5	101.2	51.1		0.00644676	123
	0.00680556	100.5	135.1	87.5	101.2	51.1		0.00645833	125
	0.00681713	100.5	135	87.5	101.2	51.2		0.00646991	126
	0.0068287	100.5	135	87.5	101.2	51.2		0.00648148	126
	0.00684028	100.5	135.1	87.5	101.2	51.3		0.00649306	126
	0.00685185	100.5	135.7	87.6	101.2	51.3		0.00650463	126
	0.00686343	100.5	136.4	87.6	101.2	51.4		0.0065162	126
	0.006875	100.5	136.6	87.6	101.3	51.4		0.00652778	125
	0.00688657	100.5	136.5	87.6	101.3	51.4		0.00653935	124
	0.00689815	100.5	136.6	87.7	101.3	51.5		0.00655093	126
	0.00690972	100.5	137.4	87.7	101.3	51.6		0.0065625	125
	0.0069213	100.5	137.9	87.7	101.4	51.7		0.00657407	125
	0.00693287	100.5	138.1	87.8	101.6	51.6		0.00658565	126
	0.00694444	100.2	136.2	87.6	100.3	50.7		0.00659722	126
	0.00696759	99.7	131	87.4	99	50.3		0.0066088	125
	0.00697917	99.5	125.7	87.2	98.4	50.2		0.00662037	125
	0.00699074	99.4	122.4	87.1	98.7	50.1		0.00663194	125
	0.00700231	99.2	119.7	86.9	98.9	50		0.00664352	125
	0.00701389	99	117.7	86.8	99.1	49.9		0.00665509	125
	0.00702546	98.7	116	86.6	99.2	49.9		0.00666667	125
	0.00703704	98.5	114.9	86.4	99.2	49.8		0.00667824	125
	0.00704861	98.3	113.9	86.3	99.2	49.8		0.00668981	125
	0.00706019	98.1	112.9	86.1	99.1	49.7		0.00670139	125
	0.00707176	97.9	112.3	86	99	49.7		0.00671296	124
	0.00708333	97.6	111.6	85.8	98.9	49.7		0.00672454	125
	0.00709491	97.3	110.9	85.7	98.8	49.6		0.00673611	125
	0.00710648	97.2	110.4	85.5	98.7	49.6		0.00674769	125
	0.00711806	96.9	109.8	85.4	98.6	49.5		0.00675926	125
	0.00712963	96.7	109.3	85.2	98.5	49.5		0.00677083	126
	0.0071412	96.4	108.8	85.1	98.4	49.5		0.00678241	126
	0.00715278	96.2	108.3	84.9	98.3	49.4		0.00679398	126
	0.00716435	95.9	107.9	84.8	98.2	49.5		0.00680556	126
	0.00717593	95.7	107.4	84.6	98	49.4		0.00681713	127
	0.0071875	95.4	107.1	84.5	97.9	49.4		0.0068287	127
	0.00719907	95.2	106.7	84.4	97.8	49.4		0.00684028	127
	0.00721065	95	106.3	84.2	97.7	49.4		0.00685185	128
	0.0072338	94.7	105.9	84.1	97.5	49.3		0.00686343	128
	0.00724537	94.5	105.6	84	97.4	49.3		0.006875	128
	0.00725694	94.2	105.2	83.8	97.2	49.3		0.00688657	128
	0.00726852	94	104.9	83.7	97.1	49.2		0.00689815	128
	0.00728009	93.7	104.5	83.5	96.9	49.2		0.00690972	128
	0.00729167	93.5	104.3	83.4	96.8	49.2		0.0069213	129
	0.00730324	93.3	104	83.3	96.6	49.2		0.00693287	130
	0.00731481	93	103.7	83.1	96.5	49.1		0.00694444	129
	0.00732639	92.8	103.4	83	96.3	49.1		0.00695602	129
	0.00733796	92.6	103.1	82.8	96.2	49.1		0.00696759	129
	0.00734954	92.4	102.9	82.7	96	49.1		0.00697917	129
	0.00736111	92.1	102.5	82.5	95.8	49		0.00699074	125
	0.00737269	91.9	102.3	82.4	95.7	49		0.00700231	128
	0.00738426	91.6	102	82.3	95.5	49		0.00701389	125
	0.00739583	91.5	101.8	82.2	95.3	49		0.00702546	99
	0.00740741	91.2	101.5	82	95.2	49		0.00703704	97
	0.00741898	91	101.3	81.9	95	48.9		0.00704861	98
	0.00743056	90.8	101.1	81.8	94.9	48.9		0.00706019	99
	0.0074537	90.5	100.7	81.6	94.7	48.9		0.00707176	100
	0.00746528	90.3	100.5	81.5	94.5	48.9		0.00708333	101
	0.00747685	90.1	100.3	81.4	94.3	48.9		0.00709491	101
	0.00748843	89.9	100	81.2	94.1	48.8		0.00710648	101
	0.0075	89.7	99.8	81.1	94	48.8		0.00711806	101
	0.00751157	89.5	99.6	81	93.8	48.8		0.00712963	101
	0.00752315	89.3	99.3	80.8	93.7	48.8		0.0071412	101
	0.00753472	89.1	99.1	80.7	93.5	48.8		0.00715278	100
	0.0075463	88.9	98.9	80.6	93.4	48.8		0.00716435	100
	0.00755787	88.7	98.7	80.5	93.2	48.7		0.00717593	100
	0.00756944	88.5	98.4	80.3	93.1	48.7		0.0071875	100
	0.00758102	88.4	98.2	80.2	92.9	48.7		0.00719907	99
	0.00759259	88.2	98.1	80.1	92.8	48.6		0.00721065	99
	0.00760417	88	97.9	80	92.7	48.6		0.00722222	99
	0.00761574	87.8	97.7	79.9	92.5	48.6		0.0072338	99
	0.00762731	87.6	97.4	79.7	92.3	48.6		0.00724537	99
	0.00763889	87.4	97.2	79.6	92.2	48.6		0.00725694	98
	0.00765046	87.3	97	79.5	92	48.6		0.00726852	98
	0.00766204	87	96.8	79.4	91.9	48.6		0.00728009	98
	0.00768519	86.9	96.6	79.3	91.7	48.5		0.00729167	98
	0.00769676	86.7	96.4	79.1	91.6	48.5		0.00730324	98
	0.00770833	86.5	96.2	79	91.4	48.5		0.00731481	97
	0.00771991	86.4	96	78.9	91.3	48.5		0.00732639	97
	0.00773148	86.2	95.8	78.8	91.1	48.5		0.00733796	97
	0.00774306	86	95.6	78.7	91	48.5		0.00734954	97
	0.00775463	85.9	95.5	78.6	90.8	48.4		0.00736111	96
	0.0077662	85.7	95.2	78.4	90.7	48.4		0.00737269	96
	0.00777778	85.5	95	78.3	90.5	48.4		0.00738426	96
	0.00778935	85.4	94.9	78.2	90.4	48.4		0.00739583	96
	0.00780093	85.2	94.7	78.1	90.2	48.4		0.00740741	96
	0.0078125	85	94.5	78	90.1	48.3		0.00741898	95
	0.00782407	84.9	94.3	77.9	90	48.3		0.00743056	95
	0.00783565	84.7	94.2	77.8	89.8	48.3		0.00744213	95
	0.00784722	84.6	94	77.7	89.7	48.3		0.0074537	95
	0.0078588	84.4	93.8	77.6	89.6	48.3		0.00746528	95
	0.00787037	84.2	93.7	77.5	89.5	48.3		0.00747685	94
	0.00788194	84.1	93.4	77.3	89.3	48.2		0.00748843	94
	0.00789352	83.9	93.3	77.2	89.2	48.2		0.0075	94
	0.00790509	83.8	93.1	77.1	89	48.2		0.00751157	94
	0.00791667	83.6	92.9	77	88.9	48.2		0.00752315	94
	0.00792824	83.5	92.8	76.9	88.7	48.2		0.00753472	93
	0.00793981	83.3	92.6	76.8	88.6	48.2		0.0075463	93
	0.00795139	83.2	92.4	76.7	88.5	48.2		0.00755787	93
	0.00796296	83	92.2	76.6	88.3	48.1		0.00756944	93
	0.00797454	82.9	92.1	76.5	88.2	48.1		0.00758102	93
	0.00798611	82.7	91.9	76.4	88.1	48.1		0.00759259	92
	0.00800926	82.6	91.8	76.2	88	48.1		0.00760417	92
	0.00802083	82.4	91.6	76.1	87.8	48.1		0.00761574	92
	0.00803241	82.3	91.4	76.1	87.7	48.1		0.00762731	92
	0.00804398	82.1	91.3	75.9	87.6	48		0.00763889	92
	0.00805556	82	91.1	75.8	87.4	48		0.00765046	92
	0.00806713	81.8	91	75.7	87.3	48		0.00766204	91
	0.0080787	81.7	90.8	75.7	87.2	48		0.00767361	91
	0.00809028	81.5	90.6	75.5	87	48		0.00768519	91
	0.00810185	81.4	90.5	75.4	86.9	48		0.00769676	91
	0.00811343	81.3	90.3	75.3	86.7	47.9		0.00770833	91
	0.008125	81.1	90.1	75.2	86.6	47.9
	0.00813657	81	90	75.1	86.5	47.9
	0.00814815	80.9	89.8	75	86.4	47.9
	0.00815972	80.7	89.7	74.9	86.2	47.9
	0.0081713	80.6	89.6	74.8	86.1	47.9
	0.00818287	80.5	89.5	74.7	86	47.8
	0.00820602	80.3	89.2	74.6	85.9	47.8
	0.00821759	80.2	89.1	74.5	85.7	47.8
	0.00822917	80.1	89	74.4	85.6	47.8
	0.00824074	79.9	88.8	74.3	85.5	47.8
	0.00825231	79.8	88.6	74.2	85.4	47.8
	0.00826389	79.7	88.5	74.2	85.2	47.8
	0.00827546	79.6	88.4	74.1	85.1	47.7
	0.00828704	79.4	88.2	74	85	47.7
	0.00829861	79.3	88.1	73.9	84.9	47.7
	0.00831019	79.2	87.9	73.8	84.8	47.7
	0.00832176	79	87.8	73.7	84.7	47.7
	0.00833333	78.9	87.7	73.6	84.6	47.7
	0.00834491	78.8	87.5	73.5	84.5	47.7
	0.00835648	78.7	87.4	73.4	84.4	47.6
	0.00836806	78.5	87.2	73.3	84.2	47.6
	0.00837963	78.4	87.1	73.2	84.1	47.6
	0.00840278	78.3	86.9	73.1	83.9	47.6
	0.00841435	78.1	86.7	72.9	83.8	47.6
	0.00842593	78	86.6	72.9	83.7	47.6
	0.00844907	77.9	86.5	72.7	83.6	47.5
	0.00846065	77.7	86.3	72.7	83.5	47.5
	0.00847222	77.7	86.2	72.6	83.3	47.5
	0.0084838	77.5	86.1	72.5	83.3	47.5
	0.00849537	77.4	85.9	72.4	83.1	47.5
	0.00850694	77.3	85.8	72.3	83	47.5
	0.00851852	77.2	85.7	72.2	82.9	47.5
	0.00853009	77.1	85.6	72.2	82.8	47.4
	0.00854167	77	85.4	72.1	82.7	47.4
	0.00855324	76.9	85.3	71.9	82.6	47.4
	0.00856481	76.8	85.2	71.9	82.5	47.4
	0.00857639	76.7	85.1	71.8	82.4	47.4
	0.00858796	76.5	85	71.7	82.3	47.4
	0.00859954	76.4	84.8	71.7	82.2	47.3
	0.00862269	76.3	84.7	71.5	82	47.3
	0.00863426	76.2	84.6	71.5	82	47.3
	0.00864583	76.1	84.5	71.4	81.8	47.3
	0.00865741	76	84.4	71.3	81.8	47.3
	0.00866898	75.9	84.2	71.2	81.7	47.3
	0.00868056	75.8	84.1	71.1	81.6	47.3
	0.00869213	75.7	84	71.1	81.5	47.3
	0.0087037	75.6	83.9	71	81.3	47.2
	0.00871528	75.5	83.8	70.9	81.3	47.2
	0.00872685	75.4	83.6	70.8	81.1	47.2
	0.00873843	75.3	83.5	70.7	81	47.2
	0.00876157	75.1	83.4	70.6	80.9	47.2
	0.00877315	75.1	83.3	70.6	80.8	47.2
	0.00878472	74.9	83.1	70.5	80.7	47.2
	0.0087963	74.8	83	70.4	80.6	47.2
	0.00880787	74.7	82.9	70.3	80.5	47.1
	0.00881944	74.6	82.8	70.2	80.4	47.1
	0.00883102	74.5	82.7	70.2	80.3	47.1
	0.00884259	74.4	82.5	70.1	80.2	47.1
	0.00885417	74.3	82.4	70	80.1	47.1
	0.00886574	74.2	82.4	69.9	80	47.1
	0.00887731	74.2	82.3	69.8	79.9	47.1
	0.00890046	74.1	82.1	69.7	79.8	47
	0.00891204	74	82	69.7	79.7	47
	0.00892361	73.8	81.9	69.6	79.6	47
	0.00893519	73.8	81.8	69.5	79.5	47
	0.00894676	73.7	81.7	69.5	79.4	47
	0.00895833	73.6	81.6	69.4	79.4	47
	0.00896991	73.5	81.5	69.3	79.3	47
	0.00898148	73.4	81.4	69.3	79.2	47
	0.00899306	73.3	81.3	69.2	79.1	47
	0.00900463	73.2	81.2	69.1	79	46.9
	0.0090162	73.2	81.1	69	78.9	46.9
	0.00902778	73	81	69	78.8	46.9
	0.00903935	73	80.9	68.9	78.7	46.9
	0.00905093	72.9	80.8	68.8	78.6	46.9
	0.0090625	72.8	80.7	68.8	78.6	46.8
	0.00907407	72.7	80.6	68.7	78.5	46.8
	0.00908565	72.6	80.5	68.6	78.4	46.8
	0.00909722	72.5	80.4	68.6	78.3	46.8
	0.0091088	72.5	80.3	68.5	78.2	46.8
	0.00912037	72.4	80.2	68.4	78.1	46.8
	0.00913194	72.3	80.1	68.4	78	46.8
	0.00914352	72.2	80	68.3	77.9	46.8
	0.00915509	72.1	79.9	68.2	77.9	46.8
	0.00916667	72	79.8	68.2	77.8	46.8
	0.00917824	72	79.8	68.1	77.7	46.8
	0.00918981	71.9	79.7	68	77.6	46.7
	0.00920139	71.8	79.6	68	77.5	46.7
	0.00921296	71.7	79.5	67.9	77.4	46.7
	0.00922454	71.6	79.4	67.8	77.4	46.7
	0.00924769	71.5	79.3	67.7	77.3	46.7
	0.00925926	71.5	79.2	67.7	77.2	46.7
	0.00927083	71.4	79.1	67.6	77.1	46.7
	0.00928241	71.3	79	67.6	77.1	46.7
	0.00929398	71.3	78.9	67.5	77	46.6
	0.00930556	71.2	78.8	67.4	76.9	46.6
	0.00931713	71.1	78.8	67.4	76.8	46.6
	0.0093287	71	78.7	67.3	76.8	46.6
	0.00934028	70.9	78.6	67.2	76.6	46.6
	0.00935185	70.9	78.5	67.2	76.6	46.6
	0.00936343	70.8	78.4	67.1	76.5	46.6
	0.009375	70.7	78.3	67.1	76.4	46.6
	0.00938657	70.6	78.2	67	76.3	46.6
	0.00939815	70.6	78.2	66.9	76.3	46.6
	0.00940972	70.5	78	66.9	76.2	46.5
	0.0094213	70.4	78	66.8	76.1	46.5
	0.00943287	70.3	77.9	66.7	76	46.5
	0.00944444	70.2	77.8	66.7	75.9	46.5
	0.00945602	70.1	77.7	66.6	75.9	46.5
	0.00947917	70.1	77.6	66.5	75.8	46.5
	0.00949074	70	77.5	66.5	75.7	46.5
	0.00950231	69.9	77.4	66.4	75.6	46.5
	0.00951389	69.9	77.4	66.4	75.6	46.4
	0.00952546	69.8	77.3	66.3	75.5	46.4
	0.00953704	69.7	77.2	66.3	75.4	46.4
	0.00954861	69.6	77.1	66.2	75.3	46.4
	0.00956019	69.6	77	66.1	75.3	46.4
	0.00957176	69.5	76.9	66.1	75.2	46.4
	0.00958333	69.4	76.9	66	75.1	46.4
	0.00959491	69.3	76.8	66	75	46.4
	0.00960648	69.3	76.7	65.9	75	46.3
	0.00961806	69.2	76.6	65.8	74.9	46.3
	0.00962963	69.1	76.5	65.8	74.8	46.3
	0.0096412	69.1	76.4	65.7	74.7	46.3
	0.00965278	69	76.4	65.7	74.7	46.3
	0.00967593	68.9	76.3	65.6	74.6	46.3
	0.0096875	68.8	76.1	65.5	74.5	46.3
	0.00971065	68.7	76	65.4	74.3	46.3
	0.00972222	68.6	75.9	65.4	74.3	46.2
	0.0097338	68.6	75.8	65.3	74.2	46.3
	0.00974537	68.5	75.8	65.2	74.1	46.2
	0.00975694	68.4	75.7	65.2	74	46.2
	0.00976852	68.4	75.6	65.1	73.9	46.2
	0.00978009	68.3	75.5	65.1	73.9	46.2
	0.00979167	68.2	75.5	65.1	73.8	46.2
	0.00980324	68.1	75.4	65	73.8	46.2
	0.00981481	68.1	75.3	64.9	73.7	46.1
	0.00982639	68.1	75.2	64.8	73.6	46.2
	0.00983796	68	75.2	64.8	73.6	46.1
	0.00984954	67.9	75.1	64.7	73.5	46.1
	0.00986111	67.8	75	64.7	73.4	46.1
	0.00987269	67.8	74.9	64.6	73.3	46.1
	0.00988426	67.7	74.9	64.6	73.3	46.1
	0.00989583	67.7	74.8	64.6	73.2	46.1
	0.00990741	67.6	74.7	64.5	73.2	46.1
	0.00993056	67.5	74.6	64.4	73	46.1
	0.00994213	67.5	74.5	64.4	73	46.1
	0.0099537	67.4	74.5	64.3	72.9	46.1
	0.00996528	67.3	74.4	64.3	72.9	46
	0.00997685	67.3	74.3	64.2	72.8	46
	0.00998843	67.2	74.3	64.2	72.7	46
	0.01	67.1	74.2	64.1	72.7	46
	0.0100116	67.1	74.1	64	72.6	46
	0.0100347	67	74	64	72.6	46
	0.0100463	66.9	73.9	63.9	72.4	46
	0.0100579	66.8	73.8	63.9	72.4	46
	0.010081	66.8	73.8	63.8	72.3	46
	0.0100926	66.7	73.7	63.8	72.2	45.9
	0.0101042	66.6	73.6	63.7	72.2	46
	0.0101157	66.6	73.5	63.6	72.1	45.9
	0.0101273	66.5	73.5	63.6	72	45.9
	0.0101389	66.5	73.4	63.6	72	45.9
	0.0101505	66.4	73.3	63.5	71.9	45.9
	0.010162	66.4	73.2	63.5	71.8	45.9
	0.0101736	66.3	73.2	63.4	71.8	45.9
	0.0101852	66.3	73.1	63.4	71.7	45.8
	0.0101968	66.2	73.1	63.3	71.7	45.9
	0.0102083	66.1	73	63.3	71.6	45.8
	0.0102199	66.1	72.9	63.2	71.5	45.8
	0.0102315	66	72.9	63.2	71.5	45.8
	0.0102431	65.9	72.8	63.1	71.4	45.8
	0.0102546	65.9	72.7	63.1	71.3	45.8
	0.0102662	65.8	72.7	63.1	71.3	45.8
	0.0102778	65.8	72.6	63	71.2	45.8
	0.0102894	65.7	72.5	62.9	71.2	45.8
	0.0103009	65.7	72.5	62.9	71.1	45.8
	0.0103125	65.6	72.4	62.8	71	45.8
	0.0103241	65.6	72.3	62.8	71	45.8
	0.0103356	65.5	72.3	62.8	71	45.7
	0.0103472	65.5	72.2	62.7	70.9	45.7
	0.0103588	65.4	72.2	62.7	70.8	45.7
	0.0103704	65.4	72.1	62.6	70.7	45.7
	0.0103819	65.3	72	62.6	70.7	45.7
	0.0103935	65.2	72	62.5	70.7	45.7
	0.0104167	65.2	71.9	62.5	70.6	45.7
	0.0104282	65.1	71.9	62.4	70.5	45.7
	0.0104398	65.1	71.8	62.4	70.5	45.7
	0.0104514	65	71.7	62.3	70.4	45.7
	0.010463	65	71.7	62.3	70.3	45.7
	0.0104745	64.9	71.6	62.2	70.3	45.6
	0.0104861	64.9	71.5	62.2	70.2	45.6
	0.0104977	64.8	71.5	62.1	70.2	45.6
	0.0105093	64.7	71.4	62.1	70.1	45.6
	0.0105208	64.7	71.4	62	70	45.6
	0.0105324	64.6	71.3	62.1	70	45.6
	0.010544	64.6	71.2	62	69.9	45.6
	0.0105556	64.6	71.2	61.9	69.9	45.6
	0.0105671	64.5	71.1	61.9	69.8	45.6
	0.0105787	64.4	71	61.8	69.7	45.6
	0.0106019	64.4	71	61.8	69.7	45.6
	0.0106134	64.3	70.9	61.7	69.6	45.6
	0.010625	64.3	70.8	61.7	69.6	45.5
	0.0106366	64.2	70.8	61.7	69.5	45.5
	0.0106481	64.2	70.7	61.6	69.5	45.5
	0.0106597	64.1	70.7	61.6	69.4	45.5
	0.0106713	64	70.6	61.5	69.4	45.5
	0.0106829	64	70.6	61.5	69.3	45.5
	0.0106944	64	70.5	61.5	69.3	45.5
	0.010706	63.9	70.4	61.4	69.2	45.5
	0.0107292	63.9	70.3	61.3	69.1	45.5
	0.0107407	63.8	70.3	61.3	69.1	45.5
	0.0107523	63.8	70.2	61.3	69.1	45.5
	0.0107639	63.7	70.2	61.2	69	45.4
	0.0107755	63.7	70.1	61.2	68.9	45.4
	0.010787	63.6	70.1	61.2	68.9	45.4
	0.0107986	63.6	70	61.1	68.8	45.4
	0.0108102	63.5	70	61.1	68.8	45.4
	0.0108218	63.5	69.9	61	68.7	45.4
	0.0108333	63.4	69.8	61	68.7	45.4
	0.0108449	63.4	69.8	60.9	68.6	45.4
	0.0108565	63.4	69.7	60.9	68.6	45.4
	0.0108681	63.3	69.7	60.9	68.5	45.4
	0.0108796	63.2	69.6	60.8	68.4	45.3
	0.0108912	63.2	69.6	60.8	68.4	45.3
	0.0109028	63.2	69.5	60.7	68.4	45.3
	0.0109144	63.1	69.4	60.7	68.3	45.3
	0.0109259	63.1	69.4	60.7	68.3	45.3
	0.0109375	63	69.4	60.6	68.2	45.3
	0.0109491	63	69.3	60.6	68.2	45.3
	0.0109606	62.9	69.2	60.6	68.1	45.3
	0.0109722	62.9	69.2	60.5	68	45.3
	0.0109954	62.8	69.1	60.5	68	45.3
	0.0110069	62.8	69.1	60.4	68	45.3
	0.0110185	62.7	69	60.4	67.9	45.3
	0.0110301	62.7	69	60.4	67.9	45.3
	0.0110417	62.6	68.9	60.3	67.8	45.3
	0.0110532	62.6	68.9	60.3	67.8	45.3
	0.0110648	62.6	68.8	60.3	67.7	45.2
	0.0110764	62.5	68.8	60.2	67.7	45.2
	0.011088	62.5	68.7	60.2	67.6	45.2
	0.0110995	62.4	68.7	60.1	67.6	45.2
	0.0111111	62.4	68.6	60.1	67.5	45.2
	0.0111227	62.3	68.5	60	67.4	45.2
	0.0111343	62.3	68.5	60	67.4	45.2
	0.0111458	62.2	68.4	60	67.3	45.2
	0.0111574	62.2	68.4	60	67.3	45.2
	0.011169	62.1	68.4	59.9	67.3	45.2
	0.0111806	62.1	68.3	59.9	67.2	45.1
	0.0112037	62.1	68.3	59.8	67.2	45.1
	0.0112153	62	68.2	59.8	67.1	45.1
	0.0112269	62	68.1	59.8	67.1	45.1
	0.0112384	62	68.1	59.7	67	45.1
	0.01125	61.9	68	59.7	67	45.1
	0.0112616	61.8	68	59.7	66.9	45.1
	0.0112731	61.8	67.9	59.6	66.8	45.1
	0.0112847	61.8	67.9	59.6	66.8	45.1
	0.0112963	61.7	67.8	59.5	66.8	45.1
	0.0113079	61.7	67.8	59.5	66.7	45.1
	0.0113194	61.7	67.7	59.5	66.7	45.1
	0.011331	61.6	67.7	59.5	66.6	45.1
	0.0113426	61.6	67.7	59.4	66.6	45
	0.0113542	61.5	67.6	59.4	66.6	45
	0.0113657	61.5	67.6	59.3	66.5	45.1
	0.0113773	61.5	67.5	59.3	66.5	45
	0.0113889	61.4	67.4	59.3	66.4	45
	0.0114005	61.4	67.4	59.2	66.4	45
	0.011412	61.3	67.3	59.2	66.3	45
	0.0114236	61.3	67.3	59.2	66.3	45
	0.0114352	61.3	67.2	59.1	66.2	45
	0.0114468	61.2	67.2	59.1	66.2	45
	0.0114699	61.1	67.2	59.1	66.2	45
	0.0114815	61.1	67.1	59	66.1	44.9
	0.0114931	61.1	67.1	59	66.1	44.9
	0.0115046	61	67	58.9	66	44.9
	0.0115162	61	67	58.9	65.9	44.9
	0.0115278	61	66.9	58.9	65.9	44.9
	0.0115394	60.9	66.8	58.8	65.9	44.9
	0.0115509	60.9	66.8	58.8	65.8	44.9
	0.0115625	60.9	66.8	58.8	65.8	44.9
	0.0115741	60.8	66.7	58.8	65.7	44.9
	0.0115856	60.7	66.7	58.7	65.7	44.9
	0.0115972	60.7	66.6	58.7	65.6	44.9
	0.0116088	60.7	66.6	58.6	65.6	44.9
	0.0116204	60.7	66.5	58.6	65.5	44.9
	0.0116319	60.6	66.5	58.6	65.5	44.8
	0.0116435	60.6	66.4	58.5	65.5	44.8
	0.0116551	60.6	66.4	58.5	65.4	44.8
	0.0116667	60.5	66.3	58.5	65.4	44.8
	0.0116898	60.5	66.3	58.4	65.4	44.8
	0.0117014	60.4	66.2	58.4	65.3	44.8
	0.011713	60.4	66.2	58.4	65.2	44.8
	0.0117245	60.3	66.2	58.3	65.2	44.8
	0.0117361	60.3	66.1	58.3	65.1	44.8
	0.0117477	60.2	66.1	58.3	65.1	44.8
	0.0117593	60.2	66	58.3	65.1	44.8
	0.0117708	60.2	66	58.2	65	44.8
	0.0117824	60.2	66	58.2	65	44.8
	0.011794	60.1	65.9	58.1	64.9	44.8
	0.0118056	60.1	65.8	58.1	64.9	44.8
	0.0118171	60	65.8	58.1	64.9	44.8
	0.0118287	60	65.8	58	64.8	44.7
	0.0118403	60	65.7	58	64.8	44.8
	0.0118519	59.9	65.7	58	64.7	44.7
	0.0118634	59.9	65.6	58	64.7	44.7
	0.011875	59.9	65.6	57.9	64.6	44.7
	0.0118981	59.8	65.5	57.9	64.6	44.7
	0.0119097	59.8	65.5	57.8	64.6	44.7
	0.0119213	59.7	65.4	57.8	64.5	44.7
	0.0119329	59.7	65.4	57.8	64.5	44.7
	0.0119444	59.7	65.4	57.8	64.5	44.7
	0.011956	59.6	65.3	57.7	64.4	44.7
	0.0119676	59.6	65.3	57.7	64.4	44.7
	0.0119792	59.6	65.3	57.7	64.3	44.7
	0.0119907	59.5	65.2	57.6	64.3	44.7
	0.0120023	59.5	65.2	57.6	64.2	44.6
	0.0120139	59.5	65.1	57.6	64.2	44.6
	0.0120255	59.4	65.1	57.5	64.1	44.6
	0.012037	59.4	65	57.5	64.1	44.6
	0.0120486	59.4	65	57.5	64.1	44.6
	0.0120602	59.3	64.9	57.5	64	44.6
	0.0120718	59.3	64.9	57.4	64	44.6
	0.0120949	59.2	64.8	57.4	63.9	44.6
	0.0121181	59.2	64.8	57.3	63.9	44.6
	0.0121296	59.2	64.7	57.3	63.8	44.6
	0.0121412	59.1	64.7	57.3	63.8	44.6
	0.0121528	59.1	64.7	57.3	63.8	44.6
	0.0121644	59	64.6	57.2	63.7	44.5
	0.0121759	59	64.6	57.2	63.7	44.5
	0.0121875	59	64.5	57.2	63.7	44.5
	0.0121991	59	64.5	57.1	63.6	44.5
	0.0122106	58.9	64.4	57.1	63.6	44.5
	0.0122222	58.9	64.4	57.1	63.5	44.5
	0.0122338	58.8	64.4	57	63.5	44.5
	0.0122454	58.8	64.3	57	63.5	44.5
	0.0122569	58.8	64.3	57	63.4	44.5
	0.0122685	58.8	64.2	56.9	63.4	44.5
	0.0122801	58.7	64.2	56.9	63.4	44.5
	0.0122917	58.7	64.2	56.9	63.3	44.5
	0.0123148	58.6	64.1	56.9	63.3	44.5
	0.0123264	58.6	64.1	56.9	63.2	44.5
	0.012338	58.6	64	56.8	63.2	44.4
	0.0123495	58.6	64	56.8	63.2	44.5
	0.0123611	58.5	64	56.8	63.1	44.4
	0.0123727	58.5	63.9	56.7	63.1	44.4
	0.0123843	58.5	63.9	56.7	63.1	44.4
	0.0123958	58.4	63.8	56.7	63	44.4
	0.0124074	58.4	63.8	56.7	63	44.4
	0.012419	58.4	63.8	56.6	62.9	44.4
	0.0124306	58.3	63.7	56.6	62.9	44.4
	0.0124421	58.3	63.7	56.6	62.8	44.4
	0.0124537	58.2	63.6	56.6	62.8	44.4
	0.0124653	58.2	63.6	56.5	62.8	44.4
	0.0124769	58.2	63.6	56.5	62.8	44.4
	0.0124884	58.2	63.6	56.5	62.7	44.4
	0.0125	58.1	63.5	56.4	62.7	44.4
	0.0125116	58.1	63.4	56.4	62.6	44.4
	0.0125231	58	63.4	56.4	62.6	44.4
	0.0125347	58	63.4	56.3	62.6	44.3
	0.0125463	58	63.3	56.3	62.5	44.3
	0.0125579	58	63.3	56.3	62.5	44.3
	0.0125694	57.9	63.3	56.3	62.5	44.3
	0.0125926	57.9	63.2	56.2	62.4	44.3
	0.0126042	57.9	63.2	56.2	62.4	44.3
	0.0126157	57.8	63.1	56.2	62.4	44.3
	0.0126273	57.8	63.1	56.2	62.3	44.3
	0.0126389	57.8	63.1	56.1	62.3	44.3
	0.0126505	57.8	63	56.1	62.3	44.3
	0.012662	57.7	63	56.1	62.2	44.3
	0.0126736	57.7	63	56.1	62.2	44.3
	0.0126852	57.7	62.9	56	62.1	44.2
	0.0126968	57.7	62.9	56	62.1	44.2
	0.0127083	57.6	62.9	56	62.1	44.3
	0.0127199	57.6	62.8	56	62.1	44.3
	0.0127315	57.6	62.8	55.9	62	44.2
	0.0127431	57.5	62.7	55.9	62	44.2
	0.0127546	57.5	62.7	55.9	61.9	44.2
	0.0127662	57.5	62.7	55.8	61.9	44.2
	0.0127778	57.5	62.6	55.8	61.9	44.2
	0.0127894	57.4	62.6	55.8	61.8	44.2
	0.0128009	57.4	62.6	55.8	61.8	44.2
	0.0128125	57.4	62.5	55.8	61.8	44.2
	0.0128356	57.3	62.5	55.7	61.7	44.2
	0.0128472	57.3	62.5	55.7	61.7	44.2
	0.0128588	57.3	62.4	55.7	61.7	44.2
	0.0128704	57.2	62.4	55.6	61.6	44.2
	0.0128819	57.2	62.4	55.6	61.6	44.2
	0.0128935	57.2	62.3	55.6	61.6	44.2
	0.0129051	57.2	62.3	55.6	61.5	44.2
	0.0129167	57.1	62.2	55.5	61.5	44.2
	0.0129282	57.1	62.2	55.5	61.5	44.1
	0.0129398	57	62.2	55.5	61.4	44.1
	0.0129514	57	62.1	55.5	61.4	44.1
	0.012963	57	62.1	55.4	61.4	44.1
	0.0129861	57	62.1	55.4	61.3	44.1
	0.0129977	56.9	62	55.4	61.3	44.1
	0.0130093	56.9	62	55.4	61.3	44.1
	0.0130208	56.9	62	55.3	61.2	44.1
	0.0130324	56.9	61.9	55.3	61.2	44.1
	0.013044	56.9	61.9	55.3	61.1	44.1
	0.0130556	56.8	61.9	55.3	61.1	44.1
	0.0130671	56.8	61.9	55.2	61.1	44.1
	0.0130787	56.7	61.8	55.2	61.1	44.1
	0.0130903	56.7	61.8	55.2	61	44.1
	0.0131019	56.7	61.8	55.2	61	44.1
	0.0131134	56.7	61.7	55.2	61	44
	0.013125	56.7	61.7	55.1	61	44.1
	0.0131366	56.6	61.6	55.1	60.9	44
	0.0131481	56.6	61.6	55.1	60.9	44
	0.0131597	56.6	61.6	55.1	60.9	44
	0.0131713	56.5	61.6	55	60.8	44
	0.0131829	56.5	61.5	55	60.8	44
	0.0131944	56.5	61.5	55	60.8	44
	0.013206	56.5	61.4	54.9	60.7	44
	0.0132176	56.4	61.4	54.9	60.7	44
	0.0132292	56.5	61.3	54.9	60.7	44
	0.0132407	56.4	61.3	54.9	60.6	44
	0.0132523	56.4	61.3	54.9	60.6	44
	0.0132639	56.3	61.3	54.8	60.6	44
	0.013287	56.3	61.3	54.8	60.6	44
	0.0132986	56.3	61.2	54.8	60.5	43.9
	0.0133102	56.3	61.2	54.8	60.5	43.9
	0.0133218	56.2	61.1	54.8	60.5	44
	0.0133333	56.2	61.2	54.7	60.4	44
	0.0133449	56.2	61.1	54.7	60.4	43.9
	0.0133565	56.2	61	54.7	60.4	43.9
	0.0133681	56.1	61	54.7	60.3	43.9
	0.0133796	56.1	61	54.6	60.3	43.9
	0.0133912	56.1	60.9	54.6	60.2	43.9
	0.0134028	56.1	60.9	54.6	60.2	43.9
	0.0134144	56.1	60.9	54.6	60.2	43.9
	0.0134259	56	60.9	54.6	60.2	43.9
	0.0134375	56	60.8	54.5	60.2	43.9
	0.0134491	56	60.8	54.5	60.1	43.9
	0.0134606	55.9	60.8	54.5	60.1	43.9
	0.0134722	55.9	60.8	54.5	60.1	43.9
	0.0134838	55.9	60.7	54.5	60	43.9
	0.0134954	55.8	60.7	54.4	60	43.9
	0.0135069	55.8	60.6	54.4	60	43.9
	0.0135185	55.8	60.6	54.4	59.9	43.9
	0.0135301	55.8	60.6	54.4	59.9	43.8
	0.0135417	55.8	60.5	54.3	59.8	43.8
	0.0135532	55.7	60.5	54.3	59.8	43.8
	0.0135764	55.7	60.5	54.3	59.8	43.8
	0.013588	55.7	60.5	54.2	59.8	43.8
	0.0135995	55.7	60.4	54.2	59.7	43.8
	0.0136111	55.6	60.4	54.2	59.7	43.8
	0.0136227	55.6	60.4	54.2	59.7	43.8
	0.0136343	55.6	60.3	54.2	59.7	43.8
	0.0136458	55.6	60.3	54.1	59.7	43.8
	0.0136574	55.5	60.3	54.1	59.6	43.8
	0.013669	55.5	60.3	54.1	59.6	43.8
	0.0136806	55.5	60.2	54.1	59.6	43.8
	0.0136921	55.5	60.2	54.1	59.5	43.8
	0.0137037	55.4	60.2	54	59.5	43.8
	0.0137153	55.4	60.2	54	59.5	43.8
	0.0137269	55.4	60.1	54	59.4	43.8
	0.0137384	55.4	60.1	54	59.4	43.7
	0.01375	55.4	60.1	54	59.4	43.7
	0.0137616	55.3	60	53.9	59.4	43.7
	0.0137847	55.3	60	53.9	59.3	43.7
	0.0137963	55.3	60	53.9	59.3	43.7
	0.0138079	55.3	59.9	53.9	59.3	43.7
	0.0138194	55.2	59.9	53.9	59.3	43.7
	0.013831	55.2	59.9	53.8	59.2	43.7
	0.0138426	55.2	59.8	53.8	59.2	43.7
	0.0138542	55.1	59.8	53.8	59.2	43.7
	0.0138657	55.1	59.8	53.8	59.2	43.7
	0.0138773	55.1	59.8	53.7	59.1	43.7
	0.0138889	55.1	59.7	53.7	59.1	43.7
	0.0139005	55.1	59.7	53.7	59.1	43.7
	0.013912	55.1	59.7	53.7	59	43.7
	0.0139236	55	59.7	53.7	59	43.7
	0.0139352	55	59.6	53.6	59	43.7
	0.0139468	55	59.6	53.6	58.9	43.7
	0.0139583	54.9	59.6	53.6	59	43.7
	0.0139699	54.9	59.5	53.6	58.9	43.7
	0.0139815	54.9	59.5	53.6	58.9	43.7
	0.0139931	54.9	59.5	53.6	58.8	43.6
	0.0140046	54.9	59.5	53.5	58.8	43.6
	0.0140278	54.8	59.4	53.5	58.8	43.6
	0.0140394	54.8	59.4	53.5	58.8	43.6
	0.0140509	54.8	59.4	53.5	58.7	43.6
	0.0140625	54.8	59.3	53.5	58.7	43.6
	0.0140741	54.8	59.3	53.4	58.7	43.6
	0.0140856	54.7	59.3	53.4	58.6	43.6
	0.0140972	54.7	59.2	53.4	58.6	43.6
	0.0141088	54.7	59.2	53.4	58.6	43.6
	0.0141204	54.6	59.2	53.3	58.6	43.6
	0.0141319	54.7	59.2	53.3	58.5	43.6
	0.0141435	54.6	59.2	53.3	58.5	43.6
	0.0141551	54.6	59.1	53.3	58.5	43.6
	0.0141667	54.6	59.1	53.3	58.5	43.6
	0.0141782	54.5	59.1	53.3	58.4	43.6
	0.0141898	54.5	59	53.2	58.4	43.5
	0.0142014	54.5	59	53.2	58.4	43.6
	0.014213	54.5	59	53.2	58.3	43.6
	0.0142245	54.4	59	53.2	58.3	43.5
	0.0142361	54.4	58.9	53.1	58.3	43.6
	0.0142593	54.4	58.9	53.1	58.3	43.6
	0.0142708	54.4	58.9	53.1	58.3	43.5
	0.0142824	54.4	58.9	53.1	58.2	43.5
	0.014294	54.3	58.8	53.1	58.2	43.5
	0.0143056	54.3	58.7	53	58.2	43.5
	0.0143171	54.3	58.7	53	58.1	43.5
	0.0143287	54.3	58.7	53	58.1	43.5
	0.0143403	54.3	58.7	53	58.1	43.5
	0.0143519	54.3	58.7	53	58.1	43.5
	0.0143634	54.2	58.7	53	58.1	43.5
	0.014375	54.2	58.6	52.9	58.1	43.5
	0.0143866	54.2	58.6	52.9	58	43.5
	0.0143981	54.2	58.6	52.9	57.9	43.5
	0.0144213	54.1	58.5	52.9	58	43.5
	0.0144329	54.1	58.5	52.9	57.9	43.4
	0.0144444	54.1	58.5	52.9	57.9	43.5
	0.014456	54.1	58.5	52.8	57.8	43.4
	0.0144676	54	58.4	52.8	57.8	43.4
	0.0144792	54	58.4	52.8	57.8	43.4
	0.0144907	54	58.4	52.8	57.8	43.4
	0.0145023	54	58.4	52.8	57.8	43.4
	0.0145139	54	58.3	52.8	57.7	43.4
	0.0145255	53.9	58.3	52.7	57.7	43.4
	0.014537	53.9	58.3	52.7	57.7	43.4
	0.0145486	53.9	58.2	52.7	57.7	43.4
	0.0145602	53.9	58.2	52.7	57.7	43.4
	0.0145718	53.8	58.2	52.7	57.6	43.4
	0.0145833	53.8	58.2	52.6	57.6	43.4
	0.0145949	53.8	58.2	52.6	57.6	43.4
	0.0146065	53.8	58.1	52.6	57.5	43.4
	0.0146181	53.8	58.1	52.6	57.5	43.4
	0.0146296	53.8	58.1	52.5	57.5	43.4
	0.0146412	53.8	58.1	52.5	57.5	43.4
	0.0146528	53.7	58	52.5	57.5	43.4
	0.0146644	53.7	58	52.5	57.4	43.4
	0.0146759	53.7	58	52.5	57.5	43.4
	0.0146991	53.7	58	52.5	57.4	43.4
	0.0147106	53.7	58	52.5	57.4	43.4
	0.0147222	53.6	57.9	52.4	57.4	43.3
	0.0147338	53.6	57.9	52.4	57.3	43.4
	0.0147454	53.6	57.8	52.4	57.3	43.3
	0.0147569	53.6	57.8	52.4	57.3	43.3
	0.0147685	53.6	57.8	52.4	57.3	43.3
	0.0147801	53.5	57.8	52.3	57.2	43.3
	0.0147917	53.5	57.7	52.3	57.2	43.3
	0.0148032	53.5	57.7	52.3	57.2	43.3
	0.0148148	53.5	57.7	52.2	57.1	43.3
	0.0148264	53.5	57.7	52.3	57.1	43.3
	0.014838	53.4	57.7	52.2	57.1	43.3
	0.0148495	53.4	57.6	52.2	57.1	43.3
	0.0148611	53.4	57.6	52.2	57.1	43.3
	0.0148727	53.4	57.6	52.2	57	43.3
	0.0148843	53.4	57.6	52.2	57	43.3
	0.0148958	53.3	57.5	52.2	57	43.3
	0.0149074	53.3	57.5	52.1	57	43.3
	0.014919	53.3	57.5	52.1	56.9	43.2
	0.0149306	53.3	57.5	52.1	56.9	43.3
	0.0149421	53.3	57.5	52.1	56.9	43.2
	0.0149537	53.2	57.4	52.1	56.9	43.2
	0.0149769	53.2	57.4	52	56.8	43.2
	0.0149884	53.2	57.4	52	56.9	43.2
	0.015	53.2	57.4	52	56.8	43.2
	0.0150116	53.1	57.3	52	56.8	43.2
	0.0150231	53.1	57.3	52	56.8	43.2
	0.0150347	53.1	57.3	52	56.7	43.2
	0.0150463	53.1	57.3	52	56.7	43.2
	0.0150579	53.1	57.2	51.9	56.7	43.2
	0.0150694	53.1	57.2	51.9	56.7	43.2
	0.015081	53.1	57.2	51.9	56.6	43.2
	0.0150926	53.1	57.2	51.9	56.6	43.2
	0.0151042	53	57.1	51.9	56.6	43.2
	0.0151157	53	57.1	51.9	56.6	43.2
	0.0151273	53	57.1	51.8	56.6	43.2
	0.0151389	53	57.1	51.8	56.6	43.2
	0.0151505	52.9	57.1	51.8	56.5	43.2
	0.015162	52.9	57	51.8	56.5	43.1
	0.0151736	52.9	57	51.8	56.5	43.2
	0.0151968	52.9	57	51.8	56.4	43.1
	0.0152083	52.9	57	51.7	56.4	43.2
	0.0152199	52.9	56.9	51.7	56.4	43.2
	0.0152315	52.8	56.9	51.7	56.4	43.1
	0.0152431	52.8	56.9	51.7	56.3	43.1
	0.0152546	52.8	56.9	51.7	56.3	43.1
	0.0152662	52.8	56.8	51.7	56.3	43.1
	0.0152778	52.7	56.8	51.6	56.3	43.1
	0.0152894	52.8	56.8	51.6	56.3	43.1
	0.0153009	52.7	56.8	51.6	56.2	43.1
	0.0153125	52.7	56.8	51.6	56.2	43.1
	0.0153241	52.7	56.7	51.6	56.2	43.1
	0.0153356	52.7	56.7	51.6	56.2	43.1
	0.0153472	52.7	56.7	51.5	56.1	43.1
	0.0153588	52.6	56.7	51.5	56.1	43.1
	0.0153704	52.6	56.6	51.5	56.2	43.1
	0.0153819	52.6	56.6	51.5	56.1	43.1
	0.0153935	52.6	56.6	51.5	56.1	43.1
	0.0154051	52.6	56.6	51.5	56.1	43.1
	0.0154167	52.6	56.5	51.5	56	43.1
	0.0154398	52.6	56.5	51.4	56	43.1
	0.0154514	52.5	56.5	51.4	56	43.1
	0.015463	52.5	56.5	51.4	56	43.1
	0.0154745	52.5	56.5	51.4	55.9	43
	0.0154861	52.5	56.4	51.4	55.9	43
	0.0154977	52.5	56.4	51.4	55.9	43
	0.0155093	52.4	56.4	51.3	55.9	43
	0.0155208	52.4	56.4	51.3	55.8	43
	0.0155324	52.4	56.3	51.3	55.8	43
	0.015544	52.4	56.3	51.3	55.8	43
	0.0155556	52.4	56.3	51.3	55.8	43
	0.0155671	52.3	56.3	51.3	55.8	43
	0.0155787	52.3	56.3	51.3	55.8	43
	0.0155903	52.3	56.2	51.2	55.7	43
	0.0156019	52.3	56.2	51.2	55.7	43
	0.0156134	52.3	56.2	51.2	55.7	43
	0.0156366	52.3	56.2	51.2	55.7	43
	0.0156481	52.2	56.2	51.2	55.7	43
	0.0156597	52.2	56.1	51.2	55.6	43
	0.0156713	52.2	56.1	51.1	55.6	43
	0.0156829	52.2	56.1	51.1	55.6	43
	0.0156944	52.2	56	51.1	55.6	43
	0.015706	52.2	56.1	51.1	55.6	43
	0.0157176	52.1	56	51.1	55.5	43
	0.0157292	52.1	56	51.1	55.5	43
	0.0157407	52.1	56	51	55.5	43
	0.0157523	52.1	56	51	55.5	42.9
	0.0157639	52.1	55.9	51	55.4	42.9
	0.0157755	52.1	55.9	51	55.4	42.9
	0.015787	52	55.9	51	55.4	42.9
	0.0157986	52	55.9	51	55.4	42.9
	0.0158102	52	55.9	51	55.4	42.9
	0.0158218	52	55.9	51	55.3	42.9
	0.0158333	52	55.8	50.9	55.3	42.9
	0.0158449	52	55.8	50.9	55.3	42.9
	0.0158681	52	55.8	50.9	55.3	42.9
	0.0158796	51.9	55.8	50.9	55.3	42.9
	0.0158912	51.9	55.7	50.9	55.2	42.9
	0.0159028	51.9	55.7	50.8	55.2	42.9
	0.0159144	51.9	55.7	50.8	55.2	42.9
	0.0159259	51.9	55.7	50.8	55.2	42.9
	0.0159375	51.9	55.7	50.8	55.2	42.9
	0.0159491	51.8	55.6	50.8	55.1	42.9
	0.0159606	51.8	55.6	50.8	55.1	42.9
	0.0159722	51.8	55.6	50.8	55.1	42.9
	0.0159838	51.8	55.6	50.8	55.1	42.9
	0.0159954	51.8	55.5	50.7	55.1	42.9
	0.0160069	51.8	55.6	50.7	55.1	42.9
	0.0160185	51.7	55.5	50.7	55	42.9
	0.0160301	51.7	55.5	50.7	55	42.8
	0.0160417	51.7	55.5	50.7	55	42.9
	0.0160648	51.7	55.5	50.7	55	42.8
	0.0160764	51.7	55.4	50.6	55	42.8
	0.016088	51.7	55.4	50.6	54.9	42.8
	0.0160995	51.7	55.4	50.6	54.9	42.9
	0.0161111	51.6	55.4	50.6	54.9	42.8
	0.0161227	51.6	55.4	50.6	54.9	42.8
	0.0161343	51.6	55.3	50.6	54.9	42.8
	0.0161458	51.6	55.3	50.5	54.9	42.8
	0.0161574	51.6	55.3	50.5	54.8	42.8
	0.016169	51.5	55.3	50.5	54.8	42.8
	0.0161806	51.5	55.3	50.5	54.8	42.8
	0.0161921	51.5	55.2	50.5	54.7	42.8
	0.0162037	51.5	55.2	50.5	54.7	42.8
	0.0162153	51.5	55.2	50.4	54.7	42.8
	0.0162269	51.4	55.2	50.4	54.7	42.8
	0.01625	51.4	55.2	50.4	54.7	42.8
	0.0162616	51.4	55.1	50.4	54.7	42.8
	0.0162731	51.4	55.1	50.4	54.6	42.8
	0.0162847	51.4	55.1	50.4	54.6	42.8
	0.0162963	51.4	55.1	50.4	54.6	42.8
	0.0163079	51.4	55.1	50.4	54.6	42.8
	0.0163194	51.3	55	50.4	54.5	42.7
	0.016331	51.3	55	50.4	54.5	42.7
	0.0163426	51.3	55	50.3	54.5	42.7
	0.0163542	51.3	55	50.3	54.5	42.7
	0.0163657	51.3	55	50.3	54.5	42.7
	0.0163773	51.3	54.9	50.3	54.5	42.7
	0.0163889	51.2	54.9	50.3	54.4	42.7
	0.0164005	51.3	54.9	50.3	54.4	42.7
	0.016412	51.2	54.9	50.2	54.4	42.7
	0.0164236	51.2	54.9	50.2	54.4	42.7
	0.0164468	51.2	54.9	50.2	54.4	42.7
	0.0164583	51.2	54.8	50.2	54.3	42.7
	0.0164699	51.2	54.8	50.2	54.3	42.7
	0.0164815	51.2	54.8	50.2	54.3	42.7
	0.0164931	51.1	54.8	50.2	54.3	42.7
	0.0165046	51.1	54.8	50.1	54.3	42.7
	0.0165162	51.1	54.8	50.1	54.2	42.7
	0.0165278	51.1	54.7	50.1	54.2	42.7
	0.0165394	51.1	54.7	50.1	54.2	42.7
	0.0165509	51	54.7	50.1	54.2	42.7
	0.0165741	51	54.6	50.1	54.2	42.7
	0.0165856	51	54.6	50	54.2	42.7
	0.0165972	51	54.6	50	54.1	42.7
	0.0166088	51	54.6	50	54.1	42.7
	0.0166204	51	54.5	50	54.1	42.7
	0.0166319	51	54.5	50	54.1	42.6
	0.0166435	51	54.5	50	54.1	42.6
	0.0166551	51	54.5	50	54.1	42.6
	0.0166667	50.9	54.5	50	54	42.6
	0.0166782	50.9	54.5	50	54.1	42.6
	0.0166898	50.9	54.5	49.9	54	42.6
	0.016713	50.9	54.4	49.9	54	42.6
	0.0167245	50.9	54.4	49.9	54	42.6
	0.0167361	50.9	54.4	49.9	53.9	42.6
	0.0167477	50.8	54.4	49.9	53.9	42.6
	0.0167593	50.8	54.4	49.9	53.9	42.6
	0.0167708	50.8	54.3	49.9	53.9	42.6
	0.0167824	50.8	54.3	49.8	53.8	42.6
	0.016794	50.8	54.3	49.8	53.9	42.6
	0.0168056	50.7	54.3	49.8	53.8	42.6
	0.0168171	50.8	54.3	49.8	53.8	42.6
	0.0168287	50.7	54.3	49.8	53.8	42.6
	0.0168403	50.7	54.2	49.8	53.8	42.6
	0.0168519	50.7	54.2	49.8	53.8	42.6
	0.0168634	50.7	54.2	49.7	53.7	42.5
	0.016875	50.7	54.2	49.7	53.7	42.5
	0.0168866	50.7	54.2	49.7	53.7	42.5
	0.0168981	50.6	54.1	49.7	53.7	42.6
	0.0169097	50.7	54.1	49.7	53.7	42.5
	0.0169329	50.6	54.1	49.7	53.7	42.5
	0.0169444	50.6	54.1	49.7	53.6	42.6
	0.016956	50.6	54.1	49.7	53.6	42.5
	0.0169676	50.6	54.1	49.6	53.6	42.5
	0.0169792	50.6	54	49.6	53.6	42.5
	0.0169907	50.5	54	49.6	53.6	42.5
	0.0170023	50.5	54	49.6	53.6	42.5
	0.0170139	50.5	54	49.6	53.5	42.5
	0.0170255	50.5	54	49.6	53.5	42.5
	0.017037	50.5	54	49.5	53.5	42.5
	0.0170486	50.5	53.9	49.5	53.5	42.5
	0.0170602	50.5	53.9	49.5	53.5	42.5
	0.0170718	50.5	53.9	49.6	53.5	42.5
	0.0170833	50.5	53.9	49.5	53.5	42.5
	0.0170949	50.5	53.9	49.5	53.4	42.5
	0.0171065	50.4	53.8	49.5	53.4	42.5
	0.0171181	50.4	53.8	49.5	53.4	42.5
	0.0171296	50.4	53.8	49.5	53.4	42.5
	0.0171528	50.4	53.8	49.5	53.4	42.5
	0.0171644	50.4	53.8	49.5	53.3	42.5
	0.0171759	50.3	53.8	49.4	53.4	42.5
	0.0171875	50.3	53.8	49.4	53.3	42.5
	0.0171991	50.3	53.8	49.4	53.3	42.4
	0.0172106	50.3	53.7	49.4	53.3	42.4
	0.0172222	50.3	53.7	49.4	53.2	42.4
	0.0172338	50.3	53.7	49.4	53.2	42.4
	0.0172454	50.3	53.7	49.4	53.2	42.5
	0.0172569	50.2	53.6	49.4	53.2	42.5
	0.0172685	50.2	53.6	49.4	53.2	42.4
	0.0172801	50.2	53.6	49.3	53.1	42.4
	0.0172917	50.2	53.6	49.3	53.2	42.4
	0.0173032	50.2	53.6	49.3	53.2	42.4
	0.0173148	50.2	53.6	49.3	53.1	42.4
	0.017338	50.2	53.5	49.3	53.1	42.4
	0.0173495	50.2	53.5	49.3	53.1	42.4
	0.0173611	50.1	53.5	49.3	53.1	42.4
	0.0173727	50.1	53.5	49.2	53	42.4
	0.0173843	50.1	53.5	49.2	53.1	42.4
	0.0173958	50.1	53.5	49.2	53	42.4
	0.0174074	50.1	53.5	49.2	53	42.4
	0.017419	50.1	53.4	49.2	53	42.4
	0.0174306	50.1	53.4	49.2	53	42.4
	0.0174421	50.1	53.4	49.2	52.9	42.4
	0.0174537	50	53.4	49.2	53	42.4
	0.0174653	50	53.4	49.1	52.9	42.4
	0.0174769	50	53.3	49.1	52.9	42.4
	0.0174884	50	53.4	49.1	52.9	42.4
	0.0175	50	53.3	49.1	52.9	42.4
	0.0175116	50	53.3	49.1	52.9	42.4
	0.0175231	50	53.3	49.1	52.8	42.4
	0.0175347	50	53.3	49.1	52.8	42.3
	0.0175463	49.9	53.3	49.1	52.8	42.4
	0.0175579	49.9	53.2	49.1	52.8	42.4
	0.017581	49.9	53.2	49	52.8	42.3
	0.0175926	49.9	53.2	49	52.7	42.3
	0.0176042	49.9	53.2	49	52.8	42.3
	0.0176157	49.8	53.2	49	52.7	42.3
	0.0176273	49.9	53.2	49	52.7	42.3
	0.0176389	49.8	53.2	49	52.7	42.3
	0.0176505	49.8	53.1	49	52.7	42.3
	0.017662	49.8	53.1	49	52.7	42.3
	0.0176736	49.8	53.1	48.9	52.7	42.3
	0.0176968	49.8	53.1	48.9	52.6	42.3
	0.0177083	49.8	53	48.9	52.6	42.3
	0.0177199	49.8	53	48.9	52.6	42.3
	0.0177315	49.7	53	48.9	52.6	42.3
	0.0177431	49.7	53	48.9	52.5	42.3
	0.0177546	49.7	53	48.9	52.5	42.3
	0.0177662	49.7	53	48.9	52.5	42.3
	0.0177778	49.7	53	48.8	52.6	42.3
	0.0177894	49.7	52.9	48.8	52.5	42.3
	0.0178009	49.7	52.9	48.9	52.5	42.3
	0.0178125	49.7	52.9	48.8	52.5	42.3
	0.0178241	49.7	52.9	48.8	52.5	42.3
	0.0178356	49.7	52.9	48.8	52.4	42.3
	0.0178472	49.6	52.9	48.8	52.4	42.3
	0.0178588	49.6	52.8	48.8	52.4	42.3
	0.0178704	49.6	52.9	48.8	52.4	42.3
	0.0178819	49.6	52.8	48.8	52.4	42.3
	0.0178935	49.6	52.8	48.7	52.4	42.3
	0.0179051	49.6	52.8	48.7	52.3	42.2
	0.0179282	49.5	52.8	48.7	52.3	42.2
	0.0179398	49.5	52.8	48.7	52.3	42.3
	0.0179514	49.6	52.7	48.7	52.3	42.2
	0.017963	49.5	52.7	48.7	52.3	42.2
	0.0179745	49.5	52.7	48.7	52.3	42.2
	0.0179861	49.5	52.7	48.7	52.3	42.2
	0.0179977	49.5	52.6	48.6	52.2	42.2
	0.0180093	49.5	52.7	48.6	52.2	42.2
	0.0180208	49.5	52.6	48.6	52.2	42.2
	0.0180324	49.4	52.6	48.6	52.2	42.2
	0.018044	49.4	52.6	48.6	52.2	42.2
	0.0180556	49.5	52.6	48.6	52.2	42.2
	0.0180671	49.4	52.6	48.6	52.2	42.2
	0.0180787	49.4	52.6	48.6	52.1	42.2
	0.0180903	49.4	52.5	48.6	52.1	42.2
	0.0181019	49.4	52.5	48.6	52.1	42.2
	0.0181134	49.4	52.5	48.5	52.1	42.2
	0.018125	49.4	52.5	48.5	52.1	42.2
	0.0181366	49.4	52.5	48.5	52.1	42.2
	0.0181481	49.3	52.5	48.5	52.1	42.2
	0.0181597	49.3	52.5	48.5	52	42.2
	0.0181713	49.3	52.5	48.5	52	42.2
	0.0181829	49.3	52.4	48.5	52	42.2
	0.0181944	49.3	52.5	48.5	52	42.2
	0.018206	49.3	52.4	48.4	52	42.2
	0.0182176	49.3	52.4	48.4	52	42.1
	0.0182407	49.3	52.4	48.4	52	42.2
	0.0182523	49.3	52.3	48.4	52	42.2
	0.0182639	49.3	52.3	48.5	51.9	42.1
	0.0182755	49.2	52.4	48.4	51.9	42.1
	0.018287	49.2	52.3	48.4	51.9	42.1
	0.0182986	49.2	52.3	48.4	51.9	42.1
	0.0183102	49.2	52.3	48.4	51.9	42.1
	0.0183218	49.2	52.3	48.4	51.9	42.1
	0.0183333	49.2	52.3	48.3	51.8	42.1
	0.0183449	49.1	52.3	48.3	51.8	42.1
	0.0183565	49.1	52.2	48.3	51.8	42.1
	0.0183681	49.1	52.2	48.3	51.8	42.1
	0.0183796	49.1	52.2	48.3	51.8	42.1
	0.0183912	49.1	52.2	48.3	51.8	42.1
	0.0184028	49.1	52.2	48.3	51.7	42.1
	0.0184144	49.1	52.2	48.3	51.8	42.1
	0.0184259	49.1	52.2	48.3	51.7	42.1
	0.0184375	49.1	52.1	48.2	51.7	42.1
	0.0184606	49	52.1	48.2	51.7	42.1
	0.0184722	49	52.1	48.3	51.7	42.1
	0.0184838	49	52.1	48.2	51.7	42.1
	0.0184954	49	52.1	48.2	51.7	42.1
	0.0185069	49	52.1	48.2	51.6	42.1
	0.0185185	49	52	48.2	51.6	42.1
	0.0185301	49	52	48.2	51.6	42.1
	0.0185417	49	52	48.2	51.6	42.1
	0.0185532	49	52	48.2	51.6	42.1
	0.0185648	49	52	48.1	51.6	42.1
	0.0185764	48.9	52	48.1	51.5	42
	0.018588	49	52	48.1	51.6	42.1
	0.0185995	48.9	51.9	48.1	51.5	42
	0.0186111	48.9	51.9	48.1	51.5	42
	0.0186227	48.9	51.9	48.1	51.5	42
	0.0186343	48.9	51.9	48.1	51.5	42
	0.0186458	48.9	51.9	48.1	51.5	42
	0.0186574	48.9	51.9	48.1	51.4	42
	0.018669	48.9	51.9	48.1	51.4	42
	0.0186806	48.8	51.9	48	51.4	42
	0.0186921	48.8	51.8	48	51.4	42
	0.0187153	48.8	51.8	48	51.4	42
	0.0187269	48.8	51.8	48	51.4	42
	0.0187384	48.8	51.8	48	51.4	42
	0.01875	48.8	51.8	48	51.4	42
	0.0187616	48.8	51.8	48	51.3	42
	0.0187731	48.8	51.7	48	51.3	42
	0.0187847	48.8	51.7	48	51.3	42
	0.0187963	48.8	51.7	47.9	51.3	42
	0.0188079	48.7	51.7	47.9	51.3	42
	0.0188194	48.7	51.7	47.9	51.3	42
	0.018831	48.7	51.7	47.9	51.3	42
	0.0188426	48.7	51.7	47.9	51.2	42
	0.0188542	48.7	51.7	47.9	51.2	42
	0.0188657	48.7	51.6	47.9	51.2	42
	0.0188773	48.7	51.6	47.9	51.2	42
	0.0188889	48.7	51.6	47.8	51.2	42
	0.0189005	48.7	51.6	47.8	51.2	41.9
	0.018912	48.6	51.6	47.8	51.2	42
	0.0189236	48.6	51.6	47.8	51.1	42
	0.0189352	48.6	51.6	47.9	51.1	41.9
	0.0189468	48.6	51.5	47.8	51.1	41.9
	0.0189583	48.6	51.5	47.8	51.1	41.9
	0.0189699	48.6	51.5	47.8	51.1	41.9
	0.0189815	48.6	51.5	47.8	51.1	41.9
	0.0189931	48.6	51.5	47.8	51.1	41.9
	0.0190046	48.5	51.5	47.8	51.1	41.9
	0.0190278	48.5	51.5	47.7	51	41.9
	0.0190394	48.5	51.5	47.8	51.1	41.9
	0.0190509	48.5	51.4	47.7	51	41.9
	0.0190625	48.5	51.4	47.7	51	41.9
	0.0190741	48.5	51.4	47.8	51	41.9
	0.0190856	48.5	51.4	47.7	51	41.9
	0.0190972	48.5	51.4	47.7	51	41.9
	0.0191088	48.5	51.3	47.7	51	41.9
	0.0191204	48.5	51.4	47.7	51	41.9
	0.0191319	48.4	51.4	47.7	50.9	41.9
	0.0191435	48.5	51.3	47.7	50.9	41.9
	0.0191551	48.4	51.3	47.7	50.9	41.9
	0.0191667	48.4	51.3	47.7	50.9	41.9
	0.0191782	48.4	51.3	47.6	50.9	41.9
	0.0192014	48.4	51.2	47.6	50.9	41.9
	0.019213	48.4	51.3	47.6	50.9	41.9
	0.0192245	48.4	51.2	47.6	50.8	41.9
	0.0192361	48.4	51.2	47.6	50.8	41.8
	0.0192477	48.4	51.2	47.6	50.8	41.9
	0.0192593	48.4	51.2	47.6	50.8	41.9
	0.0192708	48.3	51.2	47.6	50.8	41.8
	0.0192824	48.3	51.2	47.6	50.8	41.9
	0.019294	48.3	51.2	47.5	50.8	41.8
	0.0193056	48.3	51.2	47.6	50.7	41.8
	0.0193171	48.3	51.1	47.5	50.8	41.8
	0.0193287	48.3	51.1	47.5	50.7	41.9
	0.0193403	48.3	51.1	47.5	50.7	41.8
	0.0193519	48.3	51.1	47.5	50.7	41.8
	0.0193634	48.3	51.1	47.5	50.7	41.8
	0.019375	48.2	51.1	47.5	50.6	41.8
	0.0193866	48.2	51	47.5	50.7	41.8
	0.0193981	48.2	51.1	47.4	50.7	41.8
	0.0194213	48.2	51	47.5	50.6	41.8
	0.0194329	48.2	51	47.4	50.6	41.8
	0.0194444	48.2	51	47.4	50.6	41.8
	0.019456	48.2	51	47.4	50.6	41.8
	0.0194676	48.2	51	47.4	50.6	41.8
	0.0194792	48.2	51	47.4	50.6	41.8
	0.0194907	48.1	51	47.4	50.6	41.8
	0.0195023	48.1	51	47.4	50.5	41.8
	0.0195139	48.1	50.9	47.4	50.6	41.8
	0.0195255	48.1	50.9	47.4	50.5	41.8
	0.019537	48.1	50.9	47.4	50.5	41.8
	0.0195486	48.1	50.9	47.4	50.5	41.8
	0.0195602	48.1	50.9	47.3	50.5	41.8
	0.0195718	48.1	50.9	47.3	50.5	41.8
	0.0195833	48.1	50.8	47.3	50.4	41.8
	0.0195949	48.1	50.9	47.3	50.5	41.8
	0.0196065	48.1	50.8	47.3	50.4	41.8
	0.0196181	48	50.8	47.3	50.4	41.8
	0.0196296	48.1	50.8	47.3	50.4	41.7
	0.0196412	48	50.8	47.3	50.4	41.7
	0.0196644	48	50.8	47.3	50.4	41.7
	0.0196759	48	50.8	47.2	50.3	41.8
	0.0196991	48	50.7	47.3	50.4	41.7
	0.0197106	48	50.7	47.3	50.3	41.7
	0.0197222	48	50.7	47.2	50.3	41.7
	0.0197338	48	50.7	47.2	50.3	41.7
	0.0197454	48	50.7	47.2	50.3	41.7
	0.0197569	47.9	50.7	47.2	50.3	41.7
	0.0197685	47.9	50.7	47.2	50.3	41.7
	0.0197801	47.9	50.6	47.2	50.2	41.7
	0.0197917	47.9	50.7	47.2	50.3	41.7
	0.0198032	47.9	50.6	47.2	50.2	41.7
	0.0198148	47.9	50.6	47.2	50.2	41.7
	0.0198264	47.9	50.6	47.1	50.2	41.7
	0.019838	47.9	50.6	47.2	50.2	41.7
	0.0198495	47.9	50.6	47.1	50.2	41.7
	0.0198611	47.9	50.6	47.1	50.2	41.7
	0.0198727	47.9	50.6	47.1	50.2	41.7
	0.0198958	47.8	50.5	47.1	50.1	41.7
	0.0199074	47.8	50.5	47.1	50.1	41.7
	0.019919	47.8	50.5	47.1	50.1	41.7
	0.0199306	47.8	50.5	47.1	50.1	41.7
	0.0199421	47.8	50.5	47	50.1	41.7
	0.0199537	47.8	50.5	47	50.1	41.7
	0.0199653	47.8	50.5	47	50.1	41.6
	0.0199769	47.8	50.5	47	50	41.7
	0.0199884	47.8	50.4	47	50.1	41.7
	0.02	47.7	50.4	47	50	41.7
	0.0200116	47.7	50.4	47	50.1	41.7
	0.0200231	47.7	50.4	47	50	41.6
	0.0200347	47.7	50.4	47	50	41.7
	0.0200463	47.7	50.4	47	50	41.6
	0.0200579	47.7	50.4	47	50	41.6
	0.0200694	47.7	50.4	47	49.9	41.6
	0.020081	47.7	50.4	47	49.9	41.6
	0.0200926	47.7	50.3	47	50	41.6
	0.0201157	47.6	50.3	46.9	50	41.6
	0.0201273	47.7	50.3	46.9	49.9	41.6
	0.0201389	47.6	50.3	46.9	49.9	41.6
	0.0201505	47.6	50.3	46.9	49.9	41.7
	0.020162	47.6	50.3	46.9	49.9	41.6
	0.0201736	47.6	50.3	46.9	49.9	41.6
	0.0201852	47.6	50.3	46.9	49.8	41.6
	0.0201968	47.6	50.3	46.9	49.9	41.6
	0.0202083	47.6	50.2	46.9	49.9	41.6
	0.0202199	47.6	50.2	46.9	49.8	41.6
	0.0202315	47.6	50.2	46.8	49.8	41.6
	0.0202431	47.6	50.2	46.8	49.8	41.6
	0.0202546	47.6	50.2	46.8	49.8	41.6
	0.0202662	47.6	50.1	46.8	49.8	41.6
	0.0202778	47.5	50.2	46.8	49.8	41.6
	0.0202894	47.5	50.2	46.8	49.8	41.6
	0.0203009	47.5	50.1	46.8	49.7	41.6
	0.0203125	47.5	50.1	46.8	49.7	41.6
	0.0203241	47.5	50.1	46.8	49.7	41.6
	0.0203356	47.5	50.1	46.8	49.7	41.6
	0.0203472	47.5	50.1	46.7	49.7	41.6
	0.0203588	47.5	50.1	46.7	49.7	41.6
	0.0203704	47.5	50.1	46.8	49.7	41.6
	0.0203819	47.5	50	46.7	49.7	41.5
	0.0203935	47.5	50.1	46.7	49.7	41.5
	0.0204051	47.5	50	46.7	49.6	41.6
	0.0204282	47.5	50	46.7	49.7	41.6
	0.0204398	47.4	50	46.7	49.6	41.5
	0.0204514	47.4	50	46.7	49.6	41.5
	0.020463	47.4	50	46.7	49.6	41.5
	0.0204745	47.4	50	46.7	49.6	41.5
	0.0204861	47.4	50	46.7	49.6	41.5
	0.0204977	47.4	50	46.6	49.6	41.5
	0.0205093	47.4	50	46.6	49.6	41.5
	0.0205208	47.4	49.9	46.7	49.6	41.5
	0.0205324	47.4	49.9	46.6	49.5	41.5
	0.020544	47.3	49.9	46.6	49.5	41.5
	0.0205556	47.3	49.9	46.6	49.5	41.5
	0.0205671	47.3	49.9	46.6	49.5	41.5
	0.0205787	47.3	49.9	46.6	49.5	41.5
	0.0205903	47.3	49.9	46.6	49.5	41.5
	0.0206019	47.3	49.9	46.6	49.5	41.5
	0.0206134	47.3	49.8	46.5	49.4	41.5
	0.020625	47.3	49.8	46.6	49.4	41.5
	0.0206366	47.3	49.8	46.5	49.4	41.5
	0.0206597	47.3	49.8	46.5	49.4	41.5
	0.0206713	47.3	49.8	46.5	49.4	41.5
	0.0206829	47.3	49.8	46.5	49.4	41.5
	0.0206944	47.2	49.8	46.5	49.4	41.5
	0.020706	47.2	49.8	46.5	49.4	41.5
	0.0207176	47.2	49.8	46.5	49.4	41.5
	0.0207292	47.2	49.7	46.5	49.4	41.5
	0.0207407	47.2	49.7	46.5	49.4	41.5
	0.0207523	47.2	49.7	46.5	49.3	41.5
	0.0207639	47.2	49.7	46.5	49.3	41.5
	0.0207755	47.2	49.7	46.4	49.3	41.5
	0.020787	47.2	49.7	46.5	49.3	41.5
	0.0207986	47.2	49.7	46.4	49.3	41.5
	0.0208218	47.2	49.6	46.4	49.3	41.4
	0.0208333	47.1	49.6	46.4	49.3	41.4
	0.0208565	47.1	49.6	46.4	49.3	41.4
	0.0208681	47.1	49.6	46.4	49.3	41.5
	0.0208796	47.1	49.6	46.4	49.3	41.4
	0.0208912	47.1	49.6	46.4	49.2	41.4
	0.0209028	47.1	49.6	46.4	49.2	41.4
	0.0209144	47.1	49.6	46.4	49.2	41.4
	0.0209259	47.1	49.5	46.4	49.2	41.4
	0.0209375	47.1	49.6	46.3	49.2	41.4
	0.0209491	47	49.6	46.3	49.2	41.4
	0.0209606	47	49.6	46.3	49.2	41.4
	0.0209722	47.1	49.5	46.3	49.1	41.4
	0.0209838	47	49.5	46.3	49.1	41.4
	0.0209954	47	49.5	46.3	49.1	41.4
	0.0210069	47	49.5	46.3	49.1	41.4
	0.0210185	47	49.5	46.3	49.1	41.4
	0.0210301	47	49.5	46.3	49.1	41.4
	0.0210417	47	49.4	46.3	49.1	41.4
	0.0210532	47	49.4	46.3	49.1	41.4
	0.0210764	47	49.4	46.3	49.1	41.4
	0.021088	47	49.4	46.3	49	41.4
	0.0210995	46.9	49.4	46.3	49	41.4
	0.0211111	46.9	49.4	46.2	49	41.4
	0.0211227	47	49.4	46.2	49	41.4
	0.0211343	46.9	49.4	46.2	49	41.4
	0.0211458	47	49.4	46.2	49	41.4
	0.0211574	46.9	49.3	46.2	49	41.4
	0.021169	46.9	49.4	46.2	49	41.4
	0.0211806	46.9	49.3	46.2	48.9	41.4
	0.0211921	46.9	49.3	46.2	48.9	41.3
	0.0212037	46.9	49.3	46.2	48.9	41.4
	0.0212153	46.9	49.3	46.2	48.9	41.3
	0.0212384	46.9	49.3	46.2	48.9	41.3
	0.02125	46.9	49.3	46.1	48.9	41.3
	0.0212616	46.8	49.3	46.2	48.9	41.4
	0.0212731	46.8	49.3	46.1	48.9	41.3
	0.0212847	46.8	49.2	46.1	48.9	41.3
	0.0212963	46.8	49.3	46.1	48.9	41.3
	0.0213079	46.8	49.2	46.1	48.9	41.3
	0.0213194	46.8	49.2	46.1	48.9	41.3
	0.021331	46.8	49.2	46.1	48.8	41.3
	0.0213426	46.8	49.2	46.1	48.8	41.3
	0.0213542	46.8	49.2	46.1	48.8	41.3
	0.0213657	46.7	49.2	46	48.8	41.3
	0.0213773	46.8	49.1	46.1	48.8	41.3
	0.0214005	46.8	49.2	46.1	48.8	41.3
	0.021412	46.8	49.1	46	48.7	41.3
	0.0214352	46.8	49.1	46	48.8	41.3
	0.0214468	46.7	49.1	46	48.8	41.3
	0.0214583	46.7	49.1	46	48.7	41.3
	0.0214699	46.7	49.1	46	48.7	41.3
	0.0214815	46.7	49.1	46	48.7	41.3
	0.0214931	46.7	49.1	46	48.7	41.3
	0.0215046	46.7	49	46	48.7	41.3
	0.0215162	46.7	49.1	46	48.7	41.3
	0.0215278	46.7	49.1	46	48.6	41.2
	0.0215394	46.7	49	46	48.7	41.3
	0.0215509	46.7	49	46	48.6	41.3
	0.0215741	46.6	49	45.9	48.6	41.3
	0.0215856	46.6	49	45.9	48.6	41.3
	0.0215972	46.6	48.9	45.9	48.6	41.3
	0.0216088	46.6	49	45.9	48.6	41.3
	0.0216204	46.6	49	45.9	48.6	41.3
	0.0216319	46.6	48.9	45.9	48.6	41.2
	0.0216435	46.6	48.9	45.9	48.6	41.3
	0.0216551	46.6	48.9	45.9	48.5	41.3
	0.0216667	46.6	48.9	45.9	48.5	41.2
	0.0216782	46.6	48.9	45.9	48.5	41.2
	0.0216898	46.6	48.9	45.9	48.5	41.3
	0.0217014	46.5	48.9	45.9	48.5	41.2
	0.021713	46.5	48.9	45.9	48.5	41.2
	0.0217245	46.5	48.9	45.8	48.5	41.2
	0.0217361	46.5	48.8	45.8	48.5	41.2
	0.0217477	46.5	48.8	45.8	48.5	41.2
	0.0217593	46.5	48.8	45.8	48.5	41.2
	0.0217708	46.5	48.8	45.8	48.5	41.2
	0.0217824	46.5	48.8	45.8	48.5	41.2
	0.0218056	46.5	48.8	45.8	48.4	41.2
	0.0218171	46.5	48.8	45.8	48.4	41.2
	0.0218287	46.5	48.8	45.8	48.4	41.2
	0.0218403	46.4	48.7	45.8	48.4	41.2
	0.0218519	46.4	48.8	45.8	48.4	41.2
	0.0218634	46.4	48.7	45.8	48.4	41.2
	0.021875	46.5	48.7	45.7	48.4	41.2
	0.0218866	46.4	48.7	45.7	48.4	41.2
	0.0218981	46.4	48.7	45.7	48.4	41.2
	0.0219097	46.4	48.7	45.7	48.4	41.2
	0.0219213	46.4	48.7	45.7	48.3	41.2
	0.0219329	46.4	48.7	45.7	48.3	41.2
	0.0219444	46.4	48.7	45.7	48.3	41.2
	0.021956	46.4	48.7	45.7	48.3	41.2
	0.0219676	46.4	48.6	45.7	48.3	41.2
	0.0219792	46.4	48.6	45.7	48.3	41.2
	0.0219907	46.4	48.6	45.7	48.3	41.2
	0.0220023	46.4	48.6	45.7	48.3	41.1
	0.0220139	46.3	48.6	45.7	48.3	41.2
	0.0220255	46.4	48.6	45.7	48.2	41.2
	0.022037	46.4	48.6	45.7	48.2	41.1
	0.0220602	46.3	48.6	45.6	48.2	41.2
	0.0220718	46.3	48.6	45.6	48.2	41.1
	0.0220833	46.3	48.6	45.6	48.2	41.2
	0.0220949	46.3	48.6	45.6	48.2	41.1
	0.0221065	46.3	48.5	45.6	48.2	41.2
	0.0221181	46.3	48.5	45.6	48.2	41.2
	0.0221296	46.3	48.5	45.6	48.2	41.1
	0.0221412	46.3	48.5	45.6	48.2	41.1
	0.0221528	46.3	48.5	45.6	48.2	41.1
	0.0221644	46.2	48.5	45.6	48.1	41.1
	0.0221759	46.3	48.5	45.6	48.1	41.2
	0.0221875	46.3	48.4	45.6	48.1	41.2
	0.0221991	46.2	48.3	45.6	48.1	41.2
	0.0222106	46.2	48	45.5	48.1	41.1
	0.0222222	46.2	48	45.6	48	41.1
	0.0222338	46.2	48	45.5	48	41.1
	0.0222454	46.2	47.9	45.5	48	41.1
	0.0222569	46.2	47.9	45.5	48	41.1
	0.0222801	46.2	47.8	45.5	47.9	41.1
	0.0222917	46.2	47.9	45.5	47.9	41.2
	0.0223032	46.2	47.9	45.5	47.9	42.4
	0.0223148	46.2	47.9	45.5	47.9	44
	0.0223264	46.1	47.9	45.5	47.9	45.5
	0.022338	46.1	47.9	45.4	47.9	46.8
	0.0223495	46.1	48	45.5	47.9	47.4
	0.0223611	46.1	47.9	45.5	47.9	45
	0.0223727	46.1	47.9	45.5	47.9	30.6
	0.0223843	46.1	47.9	45.4	47.9	27.1
	0.0223958	46.1	47.9	45.5	47.8	24.2
	0.0224074	46.1	47.9	45.4	47.9	23.4
	0.0224306	46.1	47.9	45.5	47.9	22.6
	0.0224421	46.1	47.9	45.4	47.9	23
	0.0224537	46.1	47.9	45.4	47.8	22.8
	0.0224653	46.1	47.9	45.4	47.9	22.5
	0.0224769	46.1	47.9	45.4	47.9	22.7
	0.0224884	46.1	47.9	45.4	47.9	23
	0.0225	46.1	47.9	45.3	47.9	24.3
	0.0225116	46.1	47.9	45.4	47.9	24.8
	0.0225231	46.1	47.8	45.4	47.8	24.7
	0.0225347	46.1	47.8	45.4	47.9	23.9
	0.0225463	46	47.8	45.4	47.8	24.6
	0.0225579	46	47.8	45.4	47.8	24.8
	0.0225694	46.1	47.8	45.3	47.8	24.9
	0.022581	46	47.8	45.4	47.8	24.4
	0.0225926	46	47.8	45.3	47.8	24
	0.0226042	46	47.8	45.3	47.8	24.1
	0.0226273	46	47.8	45.3	47.8	24.3
	0.0226389	46	47.8	45.3	47.8	24.4
	0.0226505	46	47.8	45.3	47.8	24.5
	0.022662	46	47.8	45.3	47.8	24.3
	0.0226736	46	47.8	45.3	47.8	24.2
	0.0226852	46	47.8	45.3	47.8	24.2
	0.0226968	45.9	47.7	45.3	47.7	24.3
	0.0227083	45.9	47.7	45.3	47.7	24.3
	0.0227199	45.9	47.7	45.2	47.8	24.9
	0.0227315	45.9	47.7	45.2	47.7	25
	0.0227431	45.9	47.7	45.3	47.8	25
	0.0227546	45.9	47.7	45.2	47.8	25
	0.0227662	45.9	47.7	45.2	47.7	25
	0.0227778	45.9	47.7	45.2	47.7	25
	0.0227894	45.9	47.7	45.2	47.7	25.1
	0.0228009	45.9	47.7	45.2	47.7	25.3
	0.0228241	45.9	47.6	45.2	47.7	25.5
	0.0228356	45.9	47.7	45.2	47.7	25.3
	0.0228472	45.9	47.6	45.2	47.7	25.1
	0.0228588	45.8	47.6	45.2	47.7	25.1
	0.0228704	45.8	47.6	45.2	47.7	25.3
	0.0228819	45.8	47.7	45.2	47.7	25.8
	0.0228935	45.9	47.6	45.2	47.7	25.8
	0.0229051	45.8	47.6	45.2	47.7	25.6
	0.0229167	45.8	47.6	45.2	47.6	25.9
	0.0229282	45.8	47.5	45.1	47.6	26.8
	0.0229398	45.8	47.6	45.1	47.6	26.7
	0.0229514	45.8	47.6	45.1	47.6	26.5
	0.022963	45.8	47.6	45.2	47.6	26.1
	0.0229745	45.8	47.6	45.1	47.6	25.8
	0.0229861	45.8	47.5	45.1	47.6	25.7
	0.0229977	45.8	47.5	45.1	47.6	25.7
	0.0230208	45.8	47.5	45.1	47.6	25.5
	0.0230324	45.8	47.5	45.1	47.5	25.4
	0.023044	45.7	47.5	45.1	47.6	25.4
	0.0230556	45.8	47.5	45.1	47.6	25.6
	0.0230671	45.8	47.5	45.1	47.5	25.8
	0.0230787	45.7	47.5	45.1	47.5	26.3
	0.0230903	45.7	47.5	45.1	47.5	25.9
	0.0231019	45.8	47.5	45.1	47.5	25.7
	0.0231134	45.7	47.4	45.1	47.5	25.7
	0.023125	45.7	47.5	45.1	47.5	25.8
	0.0231366	45.7	47.5	45	47.5	25.9
	0.0231597	45.7	47.4	45	47.5	25.9
	0.0231713	45.7	47.4	45	47.5	26.1
	0.0231944	45.7	47.4	45	47.5	26.1
	0.023206	45.7	47.4	45	47.4	26.1
	0.0232176	45.7	47.4	45	47.4	26.5
	0.0232292	45.7	47.4	45	47.4	26.6
	0.0232407	45.7	47.4	45	47.4	26.7
	0.0232523	45.6	47.3	45	47.4	26.4
	0.0232639	45.6	47.3	45	47.4	26.6
	0.0232755	45.6	47.3	45	47.4	26.5
	0.023287	45.6	47.3	45	47.4	26.8
	0.0232986	45.6	47.3	44.9	47.4	26.6
	0.0233102	45.6	47.3	44.9	47.4	26.2
	0.0233218	45.6	47.3	44.9	47.4	26.5
	0.0233333	45.6	47.3	45	47.4	26.7
	0.0233565	45.6	47.3	44.9	47.3	26.6
	0.0233681	45.6	47.2	44.9	47.4	26.6
	0.0233796	45.6	47.2	44.9	47.3	26.9
	0.0233912	45.6	47.3	44.9	47.3	26.9
	0.0234028	45.6	47.3	44.9	47.3	27
	0.0234144	45.6	47.2	44.9	47.3	26.9
	0.0234259	45.6	47.2	44.9	47.3	27.1
	0.0234375	45.5	47.2	44.9	47.3	27.1
	0.0234491	45.5	47.2	44.8	47.3	27.4
	0.0234606	45.5	47.2	44.9	47.2	28.1
	0.0234722	45.5	47.2	44.9	47.3	28.1
	0.0234838	45.5	47.2	44.9	47.2	28.1
	0.0234954	45.5	47.2	44.8	47.2	28.3
	0.0235069	45.5	47.1	44.9	47.2	28.5
	0.0235185	45.5	47.2	44.8	47.2	28.8
	0.0235301	45.5	47.1	44.8	47.2	29.1
	0.0235417	45.5	47.2	44.8	47.2	29.5
	0.0235532	45.5	47.1	44.8	47.2	29.5
	0.0235648	45.5	47.1	44.8	47.2	29.7
	0.023588	45.5	47.2	44.8	47.2	29.7
	0.0235995	45.5	47.1	44.8	47.2	29.8
	0.0236111	45.5	47.1	44.8	47.2	29.9
	0.0236227	45.5	47.1	44.8	47.2	29.9
	0.0236343	45.4	47.1	44.8	47.1	30
	0.0236458	45.4	47.1	44.8	47.2	30.2
	0.0236574	45.4	47	44.8	47.2	30.1

## Sheet: Fig4(C)
	Temperature mesurments in ex vivo bovine liver during 40W 10 minute microwave ablation
	Thermocouple Measurements							Ablation Probe Measurements
	Device Name:	OctTCTemp2000V2						Probe type:	LK 15
	Device Description:	Eight Channel Thermocouple Temperature Data Logger with Display						Probe settings:	40W, 10min, Liver
	Device ID:	MultiChannel
		Channel 2	Channel 4	Channel 6	Channel 8	Channel 10
	Normalized Time	Thermocouple 1 (°C)	Thermocouple 2 (°C)	Thermocouple 3 (°C)	Thermocouple 4 (°C)	Thermocouple 5 (°C)		Normalized Time	Temperature (°C)
	-1.15741e-05	36.7	35.8	36	35.7	35.9		-4.62963e-05	35
	0	36.7	35.8	36	35.6	35.8		-3.47222e-05	35
	1.15741e-05	36.8	37.1	36.3	36.2	36.7		-2.31481e-05	35
	2.31481e-05	36.8	40.7	37	34.6	37		-1.15741e-05	35
	3.47222e-05	36.9	43.8	37.6	32.6	37.2		0	35
	4.62963e-05	36.9	47	38.3	30.9	37.3		0	35
	5.78704e-05	37	50.9	39.1	29.4	37.4		1.15741e-05	35
	6.94444e-05	37	54.3	39.8	28.6	37.4		2.31481e-05	48
	8.10185e-05	37	57.9	40.4	28	37.5		3.47222e-05	56
	0.000104167	37.1	61.5	41.3	27.3	37.5		4.62963e-05	60
	0.000127315	37.1	66.8	42.7	26.5	37.6		5.78704e-05	64
	0.000138889	37.2	69.5	43.4	26.2	37.7		6.94444e-05	68
	0.000150463	37.2	72.2	44	26	37.7		8.10185e-05	70
	0.000162037	37.3	75.7	45	25.7	37.8		9.25926e-05	72
	0.000173611	37.4	78	45.6	25.5	37.8		0.000104167	75
	0.000185185	37.4	80.4	46.3	25.4	37.9		0.000115741	78
	0.000196759	37.4	82.6	47	25.3	37.9		0.000127315	79
	0.000208333	37.5	85	47.9	25.2	38		0.000138889	82
	0.000219907	37.5	86.8	48.5	25.2	38		0.000150463	84
	0.000231481	37.6	88.5	49.4	25.2	38.1		0.000162037	86
	0.000243056	37.6	89.5	50.1	25.2	38.1		0.000173611	88
	0.00025463	37.7	90.5	51	25.3	38.1		0.000185185	90
	0.000266204	37.7	91.3	51.7	25.4	38.1		0.000196759	92
	0.000289352	37.8	92.1	52.7	25.5	38.2		0.000208333	93
	0.000300926	37.8	92.7	53.4	25.5	38.2		0.000219907	95
	0.0003125	37.9	93.3	54.2	25.6	38.2		0.000231481	96
	0.000324074	37.9	93.8	55	25.7	38.3		0.000243056	98
	0.000335648	38	94.4	56.1	26	38.3		0.00025463	99
	0.000347222	38	94.9	57	26.1	38.3		0.000266204	100
	0.000358796	38.1	95.4	58.3	26.2	38.3		0.000277778	101
	0.00037037	38.1	95.9	59.2	26.3	38.4		0.000289352	102
	0.000393519	38.2	96.6	60.5	26.5	38.4		0.000300926	102
	0.000405093	38.2	97.1	61.5	26.8	38.4		0.0003125	103
	0.000416667	38.3	97.6	62.5	27	38.4		0.000324074	103
	0.000428241	38.4	98.2	63.8	27.5	38.4		0.000335648	104
	0.000439815	38.4	98.6	64.8	27.7	38.4		0.000347222	104
	0.000451389	38.5	98.9	65.7	27.9	38.5		0.000358796	104
	0.000462963	38.5	99.3	66.7	28.2	38.5		0.00037037	105
	0.000474537	38.6	99.7	67.5	28.5	38.5		0.000381944	105
	0.000486111	38.7	100.1	68.3	28.8	38.5		0.000393519	106
	0.000497685	38.7	100.5	69.2	29	38.5		0.000405093	106
	0.000509259	38.8	100.8	70	29.3	38.5		0.000416667	107
	0.000520833	38.9	101.1	71	29.4	38.5		0.000428241	107
	0.000532407	39	101.4	71.7	29.7	38.6		0.000439815	107
	0.000543981	39.1	101.5	72.4	30	38.6		0.000451389	107
	0.00056713	39.2	101.8	73.3	30.4	38.6		0.000462963	108
	0.000578704	39.2	102	73.9	30.7	38.6		0.000474537	108
	0.000590278	39.3	102.3	74.5	31	38.6		0.000486111	109
	0.000601852	39.4	102.6	75.3	31.4	38.6		0.000497685	109
	0.000613426	39.5	102.9	76	31.6	38.6		0.000509259	110
	0.000625	39.7	103.2	76.6	31.8	38.6		0.000520833	110
	0.000636574	39.8	103.6	77.2	32.1	38.6		0.000532407	111
	0.000648148	39.8	104	77.8	32.3	38.6		0.000543981	111
	0.000659722	40	104.4	78.4	32.6	38.6		0.000555556	111
	0.000671296	40.1	104.7	78.9	32.9	38.6		0.00056713	112
	0.00068287	40.2	105	79.4	33.3	38.6		0.000578704	111
	0.000706019	40.3	105.3	80.1	33.8	38.6		0.000590278	112
	0.000717593	40.4	105.6	80.6	34.1	38.6		0.000601852	112
	0.000729167	40.6	106	81.1	34.3	38.7		0.000613426	113
	0.000740741	40.7	106.3	81.6	34.6	38.7		0.000625	113
	0.000752315	40.8	106.6	82.1	34.8	38.7		0.000636574	113
	0.000763889	41	107	82.5	35.2	38.7		0.000648148	113
	0.000775463	41.1	107.4	82.9	35.5	38.7		0.000659722	114
	0.000787037	41.2	107.7	83.3	35.7	38.7		0.000671296	115
	0.000798611	41.3	108.1	83.7	35.9	38.7		0.00068287	114
	0.000810185	41.4	108.4	84.1	36.1	38.7		0.000694444	114
	0.000821759	41.5	108.7	84.5	36.5	38.8		0.000706019	115
	0.000833333	41.6	109	84.8	36.7	38.8		0.000717593	115
	0.000856481	41.7	109.4	85.2	37.1	38.8		0.000729167	116
	0.000868056	41.8	109.7	85.5	37.4	38.8		0.000740741	116
	0.00087963	41.9	110	85.8	37.7	38.8		0.000752315	116
	0.000891204	42	110.2	86.1	38.1	38.8		0.000763889	117
	0.000902778	42.1	110.5	86.4	38.3	38.8		0.000775463	117
	0.000914352	42.2	110.8	86.7	38.4	38.8		0.000787037	117
	0.000925926	42.3	111.1	87	38.7	38.9		0.000798611	118
	0.0009375	42.4	111.3	87.2	39	38.9		0.000810185	118
	0.000949074	42.5	111.5	87.5	39.7	38.9		0.000821759	119
	0.000960648	42.6	111.7	87.7	40.3	38.9		0.000833333	119
	0.000972222	42.7	112	88.1	40.6	38.9		0.000844907	119
	0.000983796	42.8	112.2	88.3	40.8	39		0.000856481	119
	0.00099537	42.9	112.5	88.5	40.9	39		0.000868056	120
	0.00100694	43.1	112.8	88.9	41.1	39		0.00087963	120
	0.00101852	43.1	112.9	89.1	41.2	39		0.000891204	120
	0.00104167	43.2	113.2	89.4	41.6	39		0.000902778	121
	0.00105324	43.3	113.4	89.7	41.8	39		0.000914352	122
	0.00106481	43.5	113.6	89.9	42	39.1		0.000925926	122
	0.00107639	43.6	113.9	90.3	42.2	39.1		0.0009375	122
	0.00108796	43.7	114.1	90.5	42.3	39.1		0.000949074	122
	0.00109954	43.8	114.3	90.7	42.7	39.1		0.000960648	122
	0.00111111	43.9	114.5	91	43.1	39.2		0.000972222	123
	0.00112269	44	114.7	91.2	43.1	39.2		0.000983796	123
	0.00113426	44.1	115	91.4	43.2	39.2		0.00099537	123
	0.00114583	44.2	115.2	91.6	43.4	39.2		0.00100694	123
	0.00115741	44.3	115.4	91.9	43.6	39.2		0.00101852	124
	0.00118056	44.4	115.7	92.1	43.7	39.3		0.00103009	124
	0.00119213	44.5	115.8	92.3	43.9	39.3		0.00104167	124
	0.0012037	44.6	116	92.4	43.9	39.3		0.00105324	124
	0.00121528	44.7	116.1	92.6	44.1	39.3		0.00106481	125
	0.00122685	44.8	116.2	92.8	44.2	39.3		0.00107639	125
	0.00123843	44.9	116.3	93	44.2	39.4		0.00108796	125
	0.00125	45	116.4	93.2	44.3	39.4		0.00109954	125
	0.00126157	45.1	116.5	93.4	44.1	39.4		0.00111111	126
	0.00127315	45.2	116.4	93.6	44.2	39.4		0.00112269	126
	0.00128472	45.4	116.4	93.8	44.3	39.4		0.00113426	126
	0.0012963	45.5	116.4	94	44.3	39.4		0.00114583	126
	0.00130787	45.6	116.5	94	44.4	39.5		0.00115741	126
	0.00131944	45.7	116.5	94.2	44.4	39.5		0.00116898	127
	0.00133102	45.8	116.6	94.3	44.3	39.5		0.00118056	127
	0.00135417	46	116.6	94.5	44.3	39.5		0.00119213	127
	0.00136574	46	116.8	94.6	44.3	39.5		0.0012037	127
	0.00137731	46.2	116.9	94.8	44.3	39.5		0.00121528	127
	0.00138889	46.3	117.1	95	44.6	39.6		0.00122685	127
	0.00140046	46.5	117.2	95.1	44.6	39.6		0.00123843	127
	0.00141204	46.6	117.3	95.3	44.5	39.6		0.00125	127
	0.00142361	46.7	117.4	95.4	44.6	39.6		0.00126157	128
	0.00143519	46.9	117.5	95.5	45	39.7		0.00127315	128
	0.00144676	47	117.6	95.6	45	39.7		0.00128472	128
	0.00145833	47.2	117.7	95.8	45.1	39.7		0.0012963	128
	0.00146991	47.3	117.8	95.9	45.3	39.8		0.00130787	128
	0.00148148	47.5	117.9	96	45.4	39.8		0.00131944	128
	0.00150463	47.7	118	96.2	45.7	39.8		0.00133102	128
	0.0015162	47.8	118	96.3	46	39.8		0.00134259	127
	0.00152778	47.9	118.1	96.4	46.1	39.9		0.00135417	127
	0.00153935	48	118.3	96.5	46.3	39.9		0.00136574	128
	0.00155093	48.2	118.4	96.6	46.5	39.9		0.00137731	127
	0.0015625	48.3	118.5	96.7	46.8	39.9		0.00138889	127
	0.00157407	48.5	118.7	96.8	47	39.9		0.00140046	127
	0.00158565	48.6	118.8	96.9	47	39.9		0.00141204	128
	0.00159722	48.7	118.9	97.1	47.2	40		0.00142361	128
	0.0016088	48.9	119.1	97.2	47.4	40		0.00143519	128
	0.00162037	49	119.2	97.3	47.4	40		0.00144676	128
	0.00163194	49.1	119.3	97.4	47.6	40		0.00145833	128
	0.00164352	49.2	119.4	97.5	47.8	40.1		0.00146991	128
	0.00165509	49.4	119.6	97.7	48	40.1		0.00148148	128
	0.00166667	49.5	119.7	97.8	48	40.1		0.00149306	128
	0.00167824	49.7	119.9	97.9	48.2	40.1		0.00150463	128
	0.00168981	49.8	120	98	48.5	40.1		0.0015162	129
	0.00170139	50	120.1	98.2	48.8	40.1		0.00152778	129
	0.00171296	50.1	120.2	98.3	49.1	40.2		0.00153935	128
	0.00172454	50.3	120.3	98.4	49.4	40.2		0.00155093	129
	0.00173611	50.4	120.4	98.5	49.4	40.2		0.0015625	129
	0.00175926	50.6	120.5	98.7	49.4	40.2		0.00157407	129
	0.00177083	50.7	120.6	98.8	49.6	40.2		0.00158565	129
	0.00178241	50.9	120.7	98.9	49.9	40.2		0.00159722	129
	0.00179398	51	120.8	99.1	50.1	40.3		0.0016088	129
	0.00180556	51.1	120.9	99.2	50.4	40.3		0.00162037	130
	0.00181713	51.3	121.1	99.3	50.6	40.3		0.00163194	129
	0.0018287	51.4	121.2	99.4	50.8	40.3		0.00164352	129
	0.00184028	51.5	121.4	99.5	51	40.4		0.00165509	129
	0.00185185	51.7	121.5	99.7	51.3	40.3		0.00166667	130
	0.00186343	51.8	121.6	99.8	51.4	40.4		0.00167824	130
	0.001875	51.9	121.7	100	51.7	40.4		0.00168981	130
	0.00188657	52	121.8	100	52.2	40.4		0.00170139	130
	0.00189815	52.2	122	100.2	52.7	40.4		0.00171296	130
	0.00190972	52.3	122.1	100.3	52.8	40.4		0.00172454	130
	0.0019213	52.4	122.2	100.4	53.2	40.4		0.00173611	130
	0.00193287	52.6	122.3	100.5	53.3	40.4		0.00174769	130
	0.00194444	52.7	122.4	100.7	53.6	40.5		0.00175926	130
	0.00195602	52.9	122.5	100.8	54.1	40.5		0.00177083	130
	0.00196759	52.9	122.7	100.9	54.4	40.5		0.00178241	130
	0.00197917	53.1	122.8	101.1	55	40.5		0.00179398	130
	0.00200231	53.2	122.9	101.2	55.6	40.5		0.00180556	131
	0.00201389	53.3	123	101.4	56.1	40.6		0.00181713	131
	0.00202546	53.4	123.2	101.5	56.3	40.5		0.0018287	131
	0.00203704	53.6	123.3	101.6	56.6	40.5		0.00184028	131
	0.00204861	53.7	123.4	101.7	56.9	40.6		0.00185185	131
	0.00206019	53.8	123.6	101.8	57.3	40.6		0.00186343	131
	0.00207176	53.9	123.8	101.9	57.5	40.6		0.001875	131
	0.00208333	54	123.9	103.4	57.5	40.6		0.00188657	131
	0.00209491	54.1	123.9	103.2	57.8	40.7		0.00189815	131
	0.00210648	54.3	123.7	103.1	57.9	40.7		0.00190972	131
	0.00211806	54.4	123.5	103	58.4	40.7		0.0019213	131
	0.00212963	54.5	123.4	102.8	58.5	40.7		0.00193287	131
	0.0021412	54.6	123.4	102.7	58.8	40.7		0.00194444	131
	0.00215278	54.8	123.4	102.6	59	40.7		0.00195602	131
	0.00216435	54.8	123.4	102.4	59.1	40.8		0.00196759	132
	0.00217593	55	123.4	102.3	59.5	40.8		0.00197917	132
	0.0021875	55.1	123.4	102.3	59.8	40.8		0.00199074	132
	0.00219907	55.2	123.5	102.2	59.9	40.8		0.00200231	132
	0.00221065	55.3	123.6	102.2	60.3	40.8		0.00201389	132
	0.00222222	55.5	123.8	102.2	61	40.8		0.00202546	132
	0.0022338	55.6	123.9	102.2	61.8	40.8		0.00203704	132
	0.00224537	55.7	123.9	102.2	62.4	40.8		0.00204861	132
	0.00226852	55.9	124.1	102.2	63.3	40.8		0.00206019	132
	0.00228009	56	124.2	102.2	63.8	40.9		0.00207176	133
	0.00229167	56.1	124.4	102.2	63.9	40.9		0.00208333	133
	0.00230324	56.2	124.5	102.2	64.6	40.9		0.00209491	132
	0.00231481	56.4	124.7	102.2	64.6	40.9		0.00210648	133
	0.00232639	56.5	124.8	102.2	64.1	40.9		0.00211806	133
	0.00233796	56.6	124.9	102.2	64.2	41		0.00212963	133
	0.00234954	56.7	125	102.2	64.7	41		0.0021412	132
	0.00236111	56.8	125.1	102.2	65.4	41		0.00215278	132
	0.00237269	56.9	125.3	102.2	66	41		0.00216435	133
	0.00238426	57	125.4	102.2	66.6	41.1		0.00217593	133
	0.00239583	57.2	125.6	102.2	66.9	41.1		0.0021875	132
	0.00240741	57.3	125.7	102.2	67.3	41.1		0.00219907	133
	0.00241898	57.4	125.9	102.2	67.8	41.2		0.00221065	132
	0.00243056	57.5	126	102.2	68	41.2		0.00222222	133
	0.0024537	57.7	126.2	102.2	68.1	41.2		0.0022338	132
	0.00246528	57.7	126.2	102.2	68	41.3		0.00224537	132
	0.00247685	57.8	126.3	102.3	68	41.3		0.00225694	133
	0.00248843	58	126.4	102.2	68.1	41.3		0.00226852	133
	0.0025	58.1	126.5	102.3	68.2	41.3		0.00228009	133
	0.00251157	58.2	126.6	102.3	68.3	41.4		0.00229167	132
	0.00252315	58.3	126.7	102.3	68.8	41.4		0.00230324	133
	0.00253472	58.4	126.8	102.3	68.8	41.4		0.00231481	133
	0.0025463	58.5	126.9	102.3	69.3	41.4		0.00232639	133
	0.00255787	58.7	126.9	102.3	69.5	41.4		0.00233796	133
	0.00256944	58.8	127	102.3	70.4	41.5		0.00234954	133
	0.00258102	58.9	127	102.3	71.6	41.5		0.00236111	133
	0.00259259	58.9	127.1	102.3	72.7	41.5		0.00237269	133
	0.00260417	59	127.2	102.4	74.1	41.5		0.00238426	133
	0.00261574	59	127.3	102.4	75.6	41.5		0.00239583	133
	0.00262731	59.1	127.4	102.4	75.7	41.5		0.00240741	133
	0.00263889	59.1	127.5	102.4	76.1	41.5		0.00241898	134
	0.00266204	59.2	127.6	102.5	76.2	41.5		0.00243056	134
	0.00267361	59.2	127.7	102.5	76.3	41.6		0.00244213	133
	0.00268519	59.3	127.7	102.5	76.8	41.6		0.0024537	134
	0.00269676	59.4	127.8	102.5	77	41.6		0.00246528	134
	0.00270833	59.5	127.9	102.5	77.1	41.6		0.00247685	134
	0.00271991	59.5	127.9	102.6	77.5	41.6		0.00248843	134
	0.00273148	59.6	127.9	102.6	77.4	41.6		0.0025	134
	0.00274306	59.7	128	102.6	79.4	41.7		0.00251157	134
	0.00275463	59.7	127.9	102.6	80.3	41.7		0.00252315	134
	0.0027662	59.8	127.8	102.7	80.2	41.7		0.00253472	134
	0.00277778	59.9	127.7	102.7	80.7	41.7		0.0025463	134
	0.00278935	59.9	127.6	102.7	81.7	41.7		0.00255787	135
	0.00280093	60	127.5	102.8	82.8	41.7		0.00256944	135
	0.0028125	60.1	127.5	102.8	82.8	41.8		0.00258102	134
	0.00282407	60.2	127.4	102.8	83.1	41.8		0.00259259	134
	0.00283565	60.3	127.4	102.8	82.5	41.8		0.00260417	134
	0.00284722	60.3	127.4	102.9	82.8	41.8		0.00261574	135
	0.00287037	60.4	127.3	102.9	83.2	41.8		0.00262731	135
	0.00288194	60.5	127.2	102.9	83.2	41.8		0.00263889	135
	0.00289352	60.6	127.2	103	83.5	41.8		0.00265046	135
	0.00290509	60.6	127.2	103	83.8	41.8		0.00266204	135
	0.00292824	60.7	127.2	103	84.3	41.8		0.00267361	135
	0.00293981	60.8	127.2	103	84.3	41.8		0.00268519	135
	0.00295139	60.8	127.2	103.1	83.2	41.8		0.00269676	135
	0.00296296	60.9	127.2	103.1	83.5	41.8		0.00270833	135
	0.00297454	61	127.2	103.1	84	41.8		0.00271991	135
	0.00298611	61	127.2	103.1	84.6	41.8		0.00273148	135
	0.00299769	61.2	127.2	103.2	84.9	41.9		0.00274306	134
	0.00300926	61.3	127.2	103.2	84.7	41.8		0.00275463	134
	0.00302083	61.4	127.3	103.3	85	41.8		0.0027662	133
	0.00303241	61.5	127.3	103.3	85.3	41.9		0.00277778	133
	0.00304398	61.7	127.2	103.3	85	41.9		0.00278935	133
	0.00305556	61.8	127.3	103.3	84.7	41.9		0.00280093	133
	0.00306713	61.9	127.3	103.4	84.8	41.9		0.0028125	133
	0.0030787	62.1	127.4	103.4	85	41.9		0.00282407	133
	0.00310185	62.2	127.4	103.4	84.5	41.9		0.00283565	133
	0.003125	62.3	127.4	103.5	84.9	42		0.00284722	132
	0.00313657	62.4	127.5	103.5	85	42		0.0028588	132
	0.00314815	62.5	127.5	103.6	85.4	42		0.00287037	132
	0.00315972	62.5	127.5	103.6	85.5	42		0.00288194	132
	0.0031713	62.5	127.5	103.6	85.2	42		0.00289352	132
	0.00318287	62.6	127.5	103.7	85.5	42.1		0.00290509	132
	0.00319444	62.6	127.5	103.7	85.4	42.1		0.00291667	132
	0.00320602	62.7	127.6	103.7	85.1	42.1		0.00292824	132
	0.00321759	62.7	127.6	103.8	85.1	42.1		0.00293981	132
	0.00322917	62.8	127.6	103.8	85.1	42.1		0.00295139	131
	0.00324074	62.8	127.6	103.8	85.3	42.2		0.00296296	131
	0.00325231	62.9	127.7	103.9	85.5	42.2		0.00297454	132
	0.00326389	62.9	127.7	103.9	85.4	42.2		0.00298611	132
	0.00328704	63	127.8	103.9	84.8	42.2		0.00299769	131
	0.00329861	63	127.8	104	84.8	42.3		0.00300926	131
	0.00331019	63.1	127.8	104	85	42.3		0.00302083	132
	0.00332176	63.1	127.8	104.1	84.9	42.3		0.00303241	132
	0.00333333	63.2	127.8	104	85	42.3		0.00304398	131
	0.00334491	63.3	127.8	104.1	85	42.3		0.00305556	131
	0.00335648	63.4	127.9	104.1	85	42.4		0.00306713	131
	0.00336806	63.4	127.9	104.2	84.9	42.4		0.0030787	131
	0.00337963	63.5	127.9	104.2	84.7	42.4		0.00309028	131
	0.0033912	63.6	128	104.2	84.6	42.4		0.00310185	131
	0.00341435	63.7	128	104.3	84.5	42.4		0.00311343	131
	0.00342593	63.8	128	104.3	84.4	42.5		0.003125	131
	0.0034375	63.9	128	104.3	84.3	42.5		0.00313657	131
	0.00344907	63.9	128	104.4	84.3	42.4		0.00314815	131
	0.00346065	63.9	128	104.4	84.3	42.4		0.00315972	131
	0.00347222	64	128.1	104.4	84.5	42.5		0.0031713	132
	0.0034838	64	128.1	104.5	84.5	42.4		0.00318287	131
	0.00349537	64.1	128.1	104.5	84.6	42.4		0.00319444	131
	0.00350694	64.2	128.1	104.6	85	42.4		0.00320602	131
	0.00351852	64.2	128.1	104.6	85.3	42.4		0.00321759	131
	0.00353009	64.3	128.2	104.6	85.5	42.5		0.00322917	131
	0.00355324	64.3	128.2	104.7	85.3	42.5		0.00324074	131
	0.00356481	64.4	128.3	104.8	85	42.5		0.00325231	131
	0.00358796	64.5	128.3	104.8	85.2	42.5		0.00326389	131
	0.00359954	64.6	128.4	104.9	85.2	42.5		0.00327546	131
	0.00361111	64.6	128.4	104.9	85.4	42.5		0.00328704	131
	0.00362269	64.6	128.4	105	85.3	42.6		0.00329861	131
	0.00363426	64.6	128.5	105	85.2	42.6		0.00331019	131
	0.00364583	64.7	128.5	105.1	85.4	42.6		0.00332176	131
	0.00365741	64.8	128.5	105.1	85.5	42.6		0.00333333	131
	0.00366898	64.8	128.5	105.2	85.7	42.6		0.00334491	131
	0.00369213	64.9	128.5	105.3	85.9	42.6		0.00335648	131
	0.0037037	64.9	128.6	105.3	85.8	42.6		0.00336806	131
	0.00371528	65	128.6	105.3	85.6	42.7		0.00337963	131
	0.00372685	65	128.6	105.4	85.7	42.6		0.0033912	131
	0.00373843	65.1	128.6	105.5	85.9	42.7		0.00340278	131
	0.00375	65.2	128.7	105.5	85.9	42.7		0.00341435	131
	0.00376157	65.2	128.6	105.6	86.2	42.7		0.00342593	131
	0.00377315	65.2	128.7	105.7	86.7	42.7		0.0034375	131
	0.00378472	65.3	128.7	105.7	86.6	42.8		0.00344907	131
	0.0037963	65.3	128.8	105.7	86.4	42.8		0.00346065	131
	0.00380787	65.3	128.8	105.8	86.5	42.8		0.00347222	131
	0.00381944	65.3	128.8	105.8	86.4	42.8		0.0034838	131
	0.00383102	65.3	128.9	105.9	85.1	42.8		0.00349537	131
	0.00384259	65.4	128.8	105.9	85.3	42.8		0.00350694	131
	0.00386574	65.4	128.9	106	86.1	42.8		0.00351852	131
	0.00387731	65.4	128.9	106	86.8	42.9		0.00353009	131
	0.00388889	65.4	128.9	106.1	86.9	42.9		0.00354167	131
	0.00390046	65.5	128.9	106.2	86.5	42.8		0.00355324	131
	0.00391204	65.4	129	106.2	86.8	42.9		0.00356481	131
	0.00392361	65.5	129	106.3	87.1	42.9		0.00357639	131
	0.00393519	65.5	129	106.3	87	42.9		0.00358796	131
	0.00394676	65.5	129.1	106.4	86.7	42.9		0.00359954	131
	0.00395833	65.5	129.1	106.4	86.7	42.9		0.00361111	131
	0.00396991	65.6	129.1	106.5	86.5	42.9		0.00362269	131
	0.00398148	65.6	129.1	106.6	86.7	42.9		0.00363426	131
	0.00399306	65.6	129.2	106.6	86.6	43		0.00364583	131
	0.00400463	65.6	129.2	106.7	86.4	43		0.00365741	131
	0.0040162	65.7	129.2	106.7	86.3	43		0.00366898	131
	0.00402778	65.7	129.3	106.7	86.4	43		0.00368056	131
	0.00403935	65.8	129.3	106.9	86.4	42.9		0.00369213	131
	0.00405093	65.8	129.2	106.9	86.5	43		0.0037037	131
	0.00407407	65.8	129.3	106.9	86.5	42.9		0.00371528	131
	0.00408565	65.9	129.2	107	86	43		0.00372685	132
	0.00409722	65.9	129.3	107	86.1	43		0.00373843	131
	0.0041088	66	129.3	107.1	86.6	43		0.00375	131
	0.00412037	66	129.4	107.2	86.9	43		0.00376157	131
	0.00413194	66	129.5	107.2	87	43		0.00377315	132
	0.00414352	66.1	129.5	107.3	87.1	43		0.00378472	132
	0.00415509	66.2	129.5	107.4	87.1	43		0.0037963	131
	0.00416667	66.2	129.5	107.4	87	43.1		0.00380787	131
	0.00417824	66.2	129.5	107.5	87.1	43		0.00381944	131
	0.00418981	66.3	129.5	107.6	87.2	43		0.00383102	132
	0.00420139	66.4	129.6	107.7	87.3	43		0.00384259	131
	0.00421296	66.4	129.6	107.8	87.1	43		0.00385417	131
	0.00422454	66.4	129.6	107.8	87	43		0.00386574	131
	0.00423611	66.5	129.6	107.9	87	43		0.00387731	132
	0.00424769	66.5	129.6	108	87	43		0.00388889	131
	0.00425926	66.6	129.6	107.9	87	43		0.00390046	131
	0.00428241	66.6	129.6	108	86.6	43		0.00391204	131
	0.00429398	66.6	129.6	108	86.4	43		0.00392361	131
	0.00430556	66.7	129.6	108	86.7	43		0.00393519	131
	0.00431713	66.7	129.6	108	86.8	43		0.00394676	131
	0.0043287	66.7	129.6	108.1	86.9	43		0.00395833	131
	0.00434028	66.8	129.5	108.1	86.2	43		0.00396991	131
	0.00435185	66.9	129.5	108.1	86.3	43		0.00398148	131
	0.00436343	66.9	129.6	108.2	86.6	43		0.00399306	131
	0.004375	66.9	129.6	108.2	87	43		0.00400463	131
	0.00438657	66.9	129.7	108.3	87.1	43.1		0.0040162	131
	0.00439815	67	129.7	108.3	86.9	43.1		0.00402778	131
	0.00440972	67	129.8	108.4	86.8	43.1		0.00403935	131
	0.0044213	67.1	129.7	108.4	86.2	43.1		0.00405093	131
	0.00443287	67.1	129.7	108.5	86.5	43.1		0.0040625	131
	0.00444444	67.1	129.7	108.5	87.1	43.1		0.00407407	131
	0.00445602	67.2	129.7	108.6	87.3	43.1		0.00408565	131
	0.00447917	67.2	129.7	108.7	87.4	43.1		0.00409722	131
	0.00449074	67.3	129.8	108.7	87.5	43.2		0.0041088	131
	0.00450231	67.3	129.8	108.8	87.5	43.2		0.00412037	131
	0.00451389	67.4	129.8	109	87.5	43.2		0.00413194	131
	0.00452546	67.4	129.8	109.1	87.6	43.2		0.00414352	130
	0.00453704	67.5	129.9	109.2	87.3	43.2		0.00415509	131
	0.00454861	67.5	130	109.2	87.3	43.2		0.00416667	131
	0.00456019	67.5	130	109.4	87.3	43.2		0.00417824	131
	0.00457176	67.6	130.1	109.5	87.4	43.2		0.00418981	131
	0.00458333	67.6	130.1	109.5	87.6	43.2		0.00420139	131
	0.00459491	67.7	130.1	109.6	87.9	43.2		0.00421296	131
	0.00460648	67.7	130.1	109.7	88.1	43.2		0.00422454	131
	0.00461806	67.7	130.1	109.9	88	43.2		0.00423611	131
	0.00462963	67.8	130.1	110	88	43.2		0.00424769	131
	0.0046412	67.8	130.1	110	88	43.2		0.00425926	131
	0.00465278	67.8	130.1	110.1	88	43.2		0.00427083	131
	0.00466435	67.9	130.1	110.2	88	43.3		0.00428241	131
	0.00467593	67.9	130.1	110.3	87.8	43.3		0.00429398	131
	0.00469907	68	130.2	110.4	87.7	43.3		0.00430556	130
	0.00471065	68	130.2	110.6	87.6	43.3		0.00431713	131
	0.00472222	68	130.2	110.6	87.6	43.3		0.0043287	131
	0.0047338	68.1	130.2	110.8	87.6	43.3		0.00434028	131
	0.00474537	68.1	130.2	110.8	87.5	43.4		0.00435185	131
	0.00475694	68.2	130.2	110.9	87.5	43.4		0.00436343	130
	0.00478009	68.2	130.1	111	87.4	43.4		0.004375	131
	0.00479167	68.2	130.2	111.1	87	43.4		0.00438657	130
	0.00480324	68.3	130.1	111.2	87.2	43.4		0.00439815	131
	0.00481481	68.3	130.1	111.2	87.2	43.4		0.00440972	130
	0.00482639	68.3	130.2	111.3	87.3	43.4		0.0044213	131
	0.00483796	68.3	130.2	111.3	87.5	43.4		0.00443287	131
	0.00484954	68.4	130.2	111.4	87.6	43.5		0.00444444	131
	0.00487269	68.4	130.2	111.5	87.9	43.5		0.00445602	130
	0.00488426	68.4	130.2	111.5	88	43.5		0.00446759	130
	0.00489583	68.5	130.2	111.5	88	43.5		0.00447917	131
	0.00490741	68.5	130.2	111.5	88	43.5		0.00449074	131
	0.00491898	68.5	130.2	111.6	87.7	43.5		0.00450231	130
	0.00493056	68.5	130.2	111.7	87.9	43.5		0.00451389	131
	0.00494213	68.6	130.2	111.7	87.9	43.5		0.00452546	131
	0.0049537	68.6	130.2	111.8	87.8	43.5		0.00453704	131
	0.00496528	68.6	130.2	111.8	87.1	43.6		0.00454861	131
	0.00497685	68.7	130.2	111.9	87.7	43.5		0.00456019	131
	0.00498843	68.7	130.2	111.9	87.8	43.6		0.00457176	131
	0.005	68.7	130.2	112	87.8	43.6		0.00458333	131
	0.00501157	68.7	130.2	112	88	43.6		0.00459491	131
	0.00502315	68.8	130.2	112.1	87.7	43.6		0.00460648	131
	0.00503472	68.8	130.2	112.1	87.7	43.6		0.00461806	131
	0.0050463	68.8	130.2	112.2	87.8	43.6		0.00462963	131
	0.00505787	68.9	130.2	112.3	87.8	43.6		0.0046412	131
	0.00506944	68.9	130.3	112.3	87.9	43.6		0.00465278	131
	0.00509259	68.9	130.2	112.4	87.2	43.6		0.00466435	131
	0.00510417	68.9	130.3	112.5	87.7	43.6		0.00467593	131
	0.00511574	68.9	130.3	112.5	87.6	43.6		0.0046875	131
	0.00512731	69	130.3	112.5	87.4	43.6		0.00469907	131
	0.00513889	69	130.3	112.6	87.8	43.6		0.00471065	131
	0.00515046	69	130.4	112.6	88.1	43.6		0.00472222	131
	0.00516204	69	130.4	112.7	88.1	43.6		0.0047338	131
	0.00517361	69.1	130.4	112.7	88	43.7		0.00474537	131
	0.00518519	69.1	130.4	112.8	88	43.7		0.00475694	130
	0.00519676	69.1	130.4	112.9	88	43.7		0.00476852	130
	0.00520833	69.1	130.4	112.9	87.6	43.7		0.00478009	131
	0.00521991	69.1	130.3	113	87.6	43.7		0.00479167	130
	0.00523148	69.2	130.4	113	87.8	43.7		0.00480324	130
	0.00524306	69.2	130.4	113.1	88	43.7		0.00481481	130
	0.00525463	69.3	130.4	113.2	88.1	43.7		0.00482639	130
	0.0052662	69.3	130.5	113.2	88.1	43.7		0.00483796	130
	0.00527778	69.3	130.5	113.3	88.1	43.8		0.00484954	130
	0.00528935	69.3	130.5	113.4	88.2	43.8		0.00486111	130
	0.00530093	69.4	130.5	113.4	88	43.8		0.00487269	130
	0.0053125	69.4	130.5	113.5	87.9	43.8		0.00488426	130
	0.00533565	69.4	130.5	113.5	88.1	43.8		0.00489583	130
	0.00534722	69.4	130.5	113.6	88.2	43.8		0.00490741	130
	0.0053588	69.4	130.5	113.7	87.4	43.8		0.00491898	130
	0.00537037	69.5	130.5	113.8	87.7	43.8		0.00493056	130
	0.00538194	69.5	130.5	113.8	87.9	43.8		0.00494213	130
	0.00539352	69.5	130.5	113.9	88	43.9		0.0049537	130
	0.00540509	69.5	130.5	113.9	88.1	43.9		0.00496528	130
	0.00541667	69.6	130.6	114	88.1	43.9		0.00497685	130
	0.00542824	69.6	130.6	114	88.1	43.9		0.00498843	130
	0.00543981	69.6	130.6	114.1	88.2	43.9		0.005	130
	0.00545139	69.6	130.6	114.2	88.1	43.9		0.00501157	130
	0.00547454	69.7	130.6	114.4	88.2	43.9		0.00502315	130
	0.00548611	69.7	130.7	114.4	88.2	44		0.00503472	130
	0.00549769	69.7	130.7	114.5	88.1	44		0.0050463	130
	0.00550926	69.7	130.7	114.7	88.2	44		0.00505787	130
	0.00552083	69.8	130.7	114.7	88.2	44		0.00506944	130
	0.00553241	69.8	130.7	114.8	88.1	44		0.00508102	130
	0.00554398	69.8	130.7	114.8	88	44.1		0.00509259	130
	0.00555556	69.8	130.7	114.8	87.9	44.1		0.00510417	130
	0.00556713	69.8	130.7	114.8	87.9	44.1		0.00511574	130
	0.00559028	69.9	130.7	114.8	87.9	44.1		0.00512731	130
	0.00560185	69.9	130.7	114.8	88	44.1		0.00513889	130
	0.00561343	69.9	130.7	114.8	88	44.1		0.00515046	130
	0.005625	69.9	130.7	114.9	88.1	44.1		0.00516204	130
	0.00563657	69.9	130.6	114.9	88.1	44.1		0.00517361	130
	0.00564815	70	130.7	114.9	88.1	44.1		0.00518519	130
	0.00565972	70	130.7	114.9	88.2	44.1		0.00519676	130
	0.0056713	70	130.7	114.7	88.2	44.1		0.00520833	130
	0.00568287	70.1	130.7	114.7	88.1	44.1		0.00521991	130
	0.00569444	70.1	130.7	114.6	88.2	44.1		0.00523148	130
	0.00570602	70.6	130.6	114.5	88	44.1		0.00524306	130
	0.00571759	71	130.6	113.9	87.8	44.1		0.00525463	130
	0.00572917	71.4	130.6	113.3	88.2	44.1		0.0052662	130
	0.00574074	71.5	130.7	113	88.3	44.2		0.00527778	130
	0.00575231	71.6	130.6	112.8	88	44.1		0.00528935	130
	0.00577546	71.7	130.6	112.6	88.1	44.2		0.00530093	130
	0.00578704	71.8	130.7	112.6	88.2	44.2		0.0053125	130
	0.00579861	71.8	130.6	112.5	88.4	44.2		0.00532407	130
	0.00581019	71.9	130.6	112.5	88.2	44.2		0.00533565	130
	0.00582176	71.9	130.6	112.6	88.4	44.2		0.00534722	130
	0.00583333	72	130.6	112.6	88.4	44.2		0.0053588	130
	0.00584491	72	130.6	112.6	88	44.2		0.00537037	130
	0.00585648	72	130.5	112.7	88.1	44.2		0.00538194	130
	0.00586806	72.1	130.5	112.7	88.2	44.2		0.00539352	130
	0.00587963	72.1	130.5	112.7	88.4	44.3		0.00540509	130
	0.0058912	72.1	130.5	112.8	88.3	44.2		0.00541667	130
	0.00591435	72.1	130.5	112.9	88.4	44.3		0.00542824	130
	0.00592593	72.2	130.5	112.9	88.5	44.3		0.00543981	130
	0.0059375	72.2	130.5	113	88.6	44.2		0.00545139	130
	0.00594907	72.2	130.5	113	88.5	44.3		0.00546296	130
	0.00596065	72.2	130.5	113.1	88.5	44.3		0.00547454	130
	0.00597222	72.2	130.4	113.2	88.5	44.3		0.00548611	130
	0.0059838	72.3	130.4	113.2	88.5	44.3		0.00549769	130
	0.00599537	72.3	130.4	113.3	88.4	44.3		0.00550926	130
	0.00600694	72.3	130.4	113.4	88.6	44.3		0.00552083	130
	0.00601852	72.3	130.4	113.4	88.6	44.3		0.00553241	130
	0.00603009	72.3	130.4	113.5	88.6	44.3		0.00554398	130
	0.00604167	72.3	130.4	113.5	88.2	44.3		0.00555556	130
	0.00606481	72.4	130.4	113.6	88.3	44.4		0.00556713	130
	0.00607639	72.4	130.4	113.7	88.5	44.3		0.0055787	130
	0.00608796	72.4	130.4	113.7	88.6	44.3		0.00559028	130
	0.00609954	72.5	130.4	113.8	88.7	44.4		0.00560185	130
	0.00611111	72.5	130.4	113.9	88.8	44.4		0.00561343	130
	0.00612269	72.5	130.5	113.9	88.8	44.4		0.005625	130
	0.00613426	72.5	130.5	113.9	88.8	44.4		0.00563657	130
	0.00614583	72.6	130.5	114	88.9	44.4		0.00564815	130
	0.00615741	72.6	130.5	114.1	88.9	44.4		0.00565972	130
	0.00616898	72.6	130.5	114.1	89	44.4		0.0056713	130
	0.00618056	72.7	130.5	114.1	89.1	44.4		0.00568287	130
	0.00619213	72.7	130.5	114.2	89.1	44.4		0.00569444	130
	0.0062037	72.8	130.5	114.2	89.1	44.4		0.00570602	130
	0.00621528	72.8	130.5	114.3	89.2	44.4		0.00571759	130
	0.00622685	72.8	130.5	114.3	89.2	44.4		0.00572917	130
	0.00623843	72.8	130.5	114.4	89.2	44.5		0.00574074	130
	0.00625	72.9	130.5	114.4	89.3	44.5		0.00575231	130
	0.00626157	72.9	130.5	114.5	89.2	44.5		0.00576389	130
	0.00627315	72.9	130.5	114.5	89.2	44.5		0.00577546	130
	0.00628472	72.9	130.4	114.6	89.3	44.5		0.00578704	130
	0.0062963	73	130.4	114.7	89.3	44.5		0.00579861	130
	0.00630787	73	130.4	114.7	89.4	44.5		0.00581019	130
	0.00631944	73	130.4	114.8	89.4	44.5		0.00582176	130
	0.00634259	73	130.4	114.9	89.4	44.5		0.00583333	130
	0.00636574	73.1	130.3	115	89.3	44.5		0.00584491	130
	0.00637731	73.1	130.3	115	89.3	44.5		0.00585648	129
	0.00638889	73.1	130.3	115.1	89.3	44.5		0.00586806	130
	0.00640046	73.1	130.3	115.2	89.2	44.5		0.00587963	130
	0.00641204	73.2	130.3	115.2	89.2	44.5		0.0058912	130
	0.00642361	73.2	130.3	115.2	89.3	44.6		0.00590278	129
	0.00643519	73.2	130.3	115.3	89.2	44.6		0.00591435	129
	0.00644676	73.2	130.2	115.3	89.1	44.6		0.00592593	129
	0.00645833	73.3	130.3	115.3	89.1	44.6		0.0059375	129
	0.00646991	73.2	130.3	115.4	89.2	44.6		0.00594907	129
	0.00648148	73.3	130.2	115.4	89.2	44.6		0.00596065	129
	0.00649306	73.3	130.2	115.5	89.2	44.6		0.00597222	129
	0.00650463	73.4	130.2	115.6	89.3	44.6		0.0059838	129
	0.0065162	73.4	130.2	115.6	89.3	44.6		0.00599537	129
	0.00652778	73.4	130.3	115.7	89.3	44.6		0.00600694	129
	0.00655093	73.4	130.3	115.7	89.5	44.6		0.00601852	129
	0.0065625	73.4	130.3	115.8	89.5	44.6		0.00603009	129
	0.00657407	73.5	130.3	115.8	89.5	44.6		0.00604167	129
	0.00658565	73.5	130.3	115.9	89.5	44.6		0.00605324	129
	0.00659722	73.5	130.3	115.9	89.6	44.7		0.00606481	129
	0.0066088	73.5	130.3	116	89.6	44.7		0.00607639	129
	0.00662037	73.6	130.3	116	89.6	44.7		0.00608796	129
	0.00663194	73.6	130.3	116.1	89.5	44.7		0.00609954	129
	0.00664352	73.6	130.3	116.1	89.6	44.7		0.00611111	129
	0.00665509	73.6	130.3	116.2	89.6	44.7		0.00612269	129
	0.00666667	73.6	130.3	116.2	89.6	44.7		0.00613426	129
	0.00667824	73.7	130.3	116.2	89.6	44.7		0.00614583	129
	0.00668981	73.7	130.4	116.3	89.6	44.7		0.00615741	129
	0.00670139	73.7	130.4	116.4	89.5	44.7		0.00616898	129
	0.00671296	73.8	130.4	116.4	89.5	44.7		0.00618056	129
	0.00673611	73.8	130.3	116.5	89.5	44.8		0.00619213	129
	0.00674769	73.9	130.3	116.5	89.4	44.8		0.0062037	129
	0.00675926	73.8	130.3	116.6	89.3	44.8		0.00621528	129
	0.00677083	73.9	130.3	116.6	89.4	44.8		0.00622685	129
	0.00678241	73.9	130.3	116.7	89.3	44.8		0.00623843	129
	0.00679398	73.9	130.3	116.7	89.3	44.8		0.00625	129
	0.00680556	73.9	130.4	116.8	89.3	44.8		0.00626157	129
	0.00681713	73.9	130.4	116.8	89.3	44.8		0.00627315	129
	0.0068287	74	130.3	116.9	89.3	44.8		0.00628472	129
	0.00684028	74	130.4	117	89.3	44.8		0.0062963	129
	0.00685185	74	130.4	117	89.2	44.8		0.00630787	129
	0.00686343	74.1	130.3	117	89.2	44.8		0.00631944	129
	0.006875	74.1	130.4	117.1	89.2	44.8		0.00633102	129
	0.00689815	74.1	130.3	117.2	89.2	44.9		0.00634259	129
	0.00690972	74.2	130.3	117.2	89.2	44.9		0.00635417	129
	0.0069213	74.2	130.3	117.2	89.1	44.9		0.00636574	129
	0.00693287	74.2	130.4	117.3	89.1	44.9		0.00637731	129
	0.00694444	74.3	130.3	117.3	89.2	44.9		0.00638889	129
	0.00695602	74.2	129.4	117.3	88.7	44.4		0.00640046	129
	0.00696759	74.2	126.3	116.8	87.5	44.1		0.00641204	129
	0.00697917	74	123.1	116.2	87	43.9		0.00642361	129
	0.00699074	74	121	115.5	87.4	43.8		0.00643519	129
	0.00700231	73.9	119.6	114.8	88	43.7		0.00644676	129
	0.00701389	73.7	118.5	113.9	89.1	43.6		0.00645833	129
	0.00702546	73.6	117.6	113.2	90	43.5		0.00646991	129
	0.00704861	73.5	116.6	112.4	90.9	43.5		0.00648148	129
	0.00706019	73.4	115.8	111.8	91.5	43.4		0.00649306	129
	0.00707176	73.3	115.1	111.2	91.8	43.4		0.00650463	129
	0.00708333	73.2	114.2	110.4	92	43.4		0.0065162	129
	0.00709491	73.1	113.5	109.9	92.1	43.3		0.00652778	129
	0.00710648	72.9	112.8	109.4	92.1	43.3		0.00653935	129
	0.00711806	72.8	112.1	108.8	92.2	43.3		0.00655093	129
	0.00712963	72.7	111.5	108.4	92.3	43.2		0.0065625	129
	0.0071412	72.6	110.7	107.9	92.3	43.2		0.00657407	129
	0.00715278	72.5	110	107.4	92.2	43.2		0.00658565	129
	0.00716435	72.4	109.4	107	92.1	43.2		0.00659722	129
	0.0071875	72.2	108.8	106.5	92	43.1		0.0066088	129
	0.00719907	72.2	108.2	106.1	91.9	43.1		0.00662037	129
	0.00721065	72	107.5	105.7	91.7	43.1		0.00663194	129
	0.00722222	71.9	107	105.3	91.6	43.1		0.00664352	129
	0.0072338	71.8	106.5	105	91.5	43		0.00665509	129
	0.00724537	71.7	105.9	104.6	91.3	43		0.00666667	129
	0.00725694	71.6	105.5	104.3	91.2	43		0.00667824	129
	0.00726852	71.5	105	103.9	91.1	43		0.00668981	129
	0.00728009	71.4	104.6	103.5	91	43		0.00670139	129
	0.00729167	71.3	104.1	103.2	90.8	43		0.00671296	129
	0.00730324	71.2	103.7	102.9	90.7	43		0.00672454	129
	0.00731481	71.1	103.3	102.5	90.6	42.9		0.00673611	129
	0.00732639	71	102.8	102.2	90.4	42.9		0.00674769	129
	0.00733796	70.8	102.5	101.9	90.3	42.9		0.00675926	129
	0.00734954	70.8	102.1	101.5	90.1	42.9		0.00677083	129
	0.00736111	70.7	101.7	101.3	90.1	42.9		0.00678241	129
	0.00737269	70.6	101.4	100.9	89.9	42.9		0.00679398	129
	0.00738426	70.5	100.8	100.5	90	42.8		0.00680556	129
	0.00739583	70.4	99.4	100.3	90.1	42.8		0.00681713	129
	0.00740741	70.3	98.9	100	90	42.7		0.0068287	129
	0.00741898	70.2	98.6	99.6	90	42.6		0.00684028	129
	0.00743056	70.1	98.4	99.3	89.8	42.4		0.00685185	129
	0.00744213	70	98.6	99	89.4	42.4		0.00686343	129
	0.00746528	69.9	98.6	98.7	89.1	42.4		0.006875	129
	0.00747685	69.7	98.4	98.1	88.9	42.5		0.00688657	129
	0.00748843	69.6	98.4	97.9	88.7	42.5		0.00689815	129
	0.00751157	69.5	98.2	97.6	88.4	42.5		0.00690972	129
	0.00752315	69.4	98.1	97.3	88.3	42.5		0.0069213	129
	0.00753472	69.3	97.9	97.1	88.3	42.5		0.00693287	129
	0.0075463	69.3	97.7	96.8	88	42.5		0.00694444	129
	0.00755787	69.1	97.6	96.6	87.9	42.4		0.00695602	129
	0.00756944	69.1	97.5	96.4	87.8	42.4		0.00696759	129
	0.00758102	68.9	97.2	96.1	87.7	42.4		0.00697917	113
	0.00759259	68.8	97.1	95.9	87.5	42.4		0.00699074	109
	0.00760417	68.8	96.9	95.7	87.3	42.4		0.00700231	110
	0.00761574	68.6	96.8	95.4	87.2	42.5		0.00701389	110
	0.00762731	68.5	96.6	95.2	87	42.4		0.00702546	111
	0.00763889	68.5	96.4	95.1	86.9	42.4		0.00703704	111
	0.00765046	68.4	96.2	94.8	86.7	42.4		0.00704861	110
	0.00766204	68.2	96	94.6	86.5	42.4		0.00706019	110
	0.00768519	68.2	95.8	94.3	86.4	42.4		0.00707176	110
	0.00769676	68	95.5	93.9	86.1	42.4		0.00708333	109
	0.00771991	67.9	95.3	93.7	86	42.4		0.00709491	108
	0.00773148	67.8	95.1	93.5	85.8	42.4		0.00710648	108
	0.00774306	67.7	95	93.3	85.7	42.4		0.00711806	107
	0.00775463	67.6	94.8	93.1	85.5	42.4		0.00712963	107
	0.0077662	67.5	94.6	92.9	85.4	42.4		0.0071412	106
	0.00777778	67.5	94.5	92.7	85.2	42.4		0.00715278	106
	0.00778935	67.4	94.3	92.6	85.1	42.4		0.00716435	105
	0.00780093	67.3	94.1	92.4	85	42.4		0.00717593	104
	0.0078125	67.2	94	92.1	84.9	42.4		0.0071875	104
	0.00782407	67.1	93.8	92	84.7	42.4		0.00719907	103
	0.00783565	67	93.7	91.8	84.6	42.4		0.00721065	103
	0.00784722	66.9	93.5	91.6	84.5	42.4		0.00722222	102
	0.0078588	66.9	93.3	91.4	84.4	42.4		0.0072338	102
	0.00787037	66.8	93.2	91.2	84.2	42.4		0.00724537	101
	0.00788194	66.7	93.1	91.1	84.1	42.3		0.00725694	101
	0.00789352	66.6	92.9	90.9	84	42.4		0.00726852	100
	0.00790509	66.5	92.7	90.7	83.8	42.3		0.00728009	100
	0.00791667	66.4	92.6	90.5	83.7	42.4		0.00729167	99
	0.00793981	66.4	92.3	90.3	83.5	42.4		0.00730324	99
	0.00795139	66.3	92.2	90.1	83.4	42.4		0.00731481	99
	0.00796296	66.2	92	90	83.3	42.3		0.00732639	98
	0.00797454	66.1	91.9	89.8	83.2	42.3		0.00733796	98
	0.00798611	66	91.7	89.6	83	42.4		0.00734954	97
	0.00799769	66	91.6	89.5	83	42.3		0.00736111	97
	0.00800926	65.9	91.4	89.3	82.8	42.3		0.00737269	97
	0.00802083	65.8	91.3	89.1	82.7	42.4		0.00738426	97
	0.00803241	65.7	91.1	88.9	82.6	42.3		0.00739583	88
	0.00804398	65.6	91	88.8	82.5	42.3		0.00740741	75
	0.00805556	65.6	90.8	88.6	82.3	42.4		0.00741898	70
	0.00806713	65.5	90.7	88.4	82.2	42.3		0.00743056	49
	0.0080787	65.4	90.5	88.3	82.1	42.3		0.00744213	48
	0.00809028	65.4	90.4	88.1	82	42.4		0.0074537	45
	0.00810185	65.3	90.2	88	81.9	42.3		0.00746528	41
	0.00811343	65.2	90.1	87.8	81.7	42.3		0.00747685	38
	0.008125	65.1	89.9	87.7	81.6	42.3		0.00748843	35
	0.00813657	65.1	89.7	87.5	81.5	42.3		0.0075	32
	0.00814815	65	89.6	87.3	81.4	42.3		0.00751157	30
	0.0081713	64.9	89.4	87.1	81.3	42.3		0.00752315	28
	0.00818287	64.9	89.3	87	81.1	42.3		0.00753472	27
	0.00819444	64.8	89.2	86.9	81	42.3		0.0075463	25
	0.00820602	64.7	89	86.7	80.9	42.3		0.00755787	25
	0.00821759	64.6	88.9	86.6	80.8	42.3		0.00756944	24
	0.00822917	64.5	88.7	86.4	80.7	42.3		0.00758102	25
	0.00824074	64.5	88.6	86.2	80.6	42.3		0.00759259	25
	0.00825231	64.4	88.4	86.1	80.4	42.3		0.00760417	25
	0.00826389	64.4	88.3	85.9	80.3	42.3		0.00761574	25
	0.00827546	64.3	88.1	85.8	80.3	42.3		0.00762731	26
	0.00828704	64.3	88	85.7	80.1	42.3		0.00763889	26
	0.00829861	64.2	87.9	85.5	80	42.3
	0.00831019	64.1	87.7	85.3	79.9	42.3
	0.00832176	64	87.6	85.2	79.8	42.3
	0.00833333	64	87.4	85.1	79.7	42.3
	0.00834491	63.9	87.3	84.9	79.6	42.3
	0.00835648	63.8	87.2	84.8	79.5	42.3
	0.00836806	63.8	87	84.7	79.4	42.3
	0.0083912	63.7	86.9	84.5	79.2	42.3
	0.00840278	63.6	86.7	84.3	79.1	42.3
	0.00841435	63.6	86.6	84.2	79	42.3
	0.00842593	63.5	86.5	84.1	78.9	42.3
	0.0084375	63.4	86.2	83.9	78.8	42.3
	0.00844907	63.4	85.8	83.8	78.7	42.3
	0.00846065	63.3	85.5	83.7	78.6	42.3
	0.00847222	63.2	85.3	83.5	78.5	42.3
	0.0084838	63.1	85.1	83.4	78.4	42.3
	0.00849537	63.1	84.9	83.2	78.3	42.3
	0.00850694	63.1	84.7	83.1	78.2	42.3
	0.00851852	63	84.6	83	78.1	42.3
	0.00853009	62.9	84.5	82.9	78	42.3
	0.00854167	62.9	84.3	82.7	77.9	42.3
	0.00855324	62.8	84.2	82.6	77.8	42.3
	0.00856481	62.8	84	82.5	77.7	42.3
	0.00857639	62.7	83.9	82.4	77.6	42.3
	0.00858796	62.6	83.7	82.3	77.5	42.3
	0.00859954	62.6	83.6	82.1	77.4	42.3
	0.00861111	62.5	83.5	82	77.3	42.3
	0.00862269	62.5	83.4	81.9	77.3	42.3
	0.00864583	62.4	83.2	81.7	77.1	42.3
	0.00865741	62.3	83	81.5	76.9	42.3
	0.00868056	62.2	82.8	81.4	76.9	42.3
	0.00869213	67.8	82.7	81.3	76.8	42.2
	0.0087037	71.3	82.6	81.1	76.7	42.2
	0.00871528	40.1	82.4	81	76.6	42.2
	0.00872685	34.6	82.3	80.9	76.5	42.2
	0.00873843	31.3	82.2	80.8	76.4	42.2
	0.00875	29.4	76.8	80.7	76.4	42.1
	0.00876157	27.7	38.3	80.5	76.3	42.1
	0.00877315	26.9	29	80.4	76.2	42.2
	0.00878472	26.9	25.4	79.6	76.1	42.1
	0.0087963	26.8	23.1	42.3	75.9	42.1
	0.00880787	26.6	21.5	35.2	75.8	42.1
	0.00881944	26.5	20.8	32.2	75.1	42.1
	0.00883102	26.3	20.4	30.7	53.8	42.1
	0.00884259	26.2	20.2	29.6	32.1	42.1
	0.00885417	26	20.4	28.7	25.1	42.6
	0.00886574	25.9	20.2	28.3	21.8	67.9
	0.00887731	25.9	20	28.1	20.1	68.1
	0.00890046	25.9	20	27.9	18.9	38.5
	0.00891204	26.1	20.1	27.5	17.8	32.3
	0.00892361	25.7	20	26.9	18	29
	0.00893519	26.6	22.2	27.3	23	28.4
	0.00894676	31.7	28.8	27.6	29.7	27.9
	0.00895833	28.3	25.3	24.6	24	23.8
	0.00896991	26.5	23.3	22.6	20.8	22.1
	0.00898148	26	22.4	21.4	19	21.4
	0.00899306	25.7	21.9	20.8	18.4	21.1
	0.00900463	25.5	21.5	20.4	17.9	20.9
	0.0090162	25.5	21.3	20.3	17.6	20.7
	0.00902778	25.5	21.2	20.2	17.5	20.6
	0.00903935	25.7	21.1	20.2	17.5	20.6
	0.00905093	25.9	21.1	20.3	17.6	20.5
	0.0090625	26	21.1	20.4	17.7	20.5
	0.00907407	26.2	21.2	20.5	17.8	20.4
	0.00909722	26.3	21.4	20.5	17.9	20.4
	0.0091088	26.4	21.5	20.5	18.1	20.4
	0.00912037	26.5	21.5	20.7	18.4	20.4
	0.00913194	26.6	21.6	20.9	18.7	20.4
	0.00914352	26.7	21.6	21.1	19	20.4
	0.00915509	26.8	21.6	21.4	19.4	20.5
	0.00916667	26.9	21.7	21.5	19.8	20.5
	0.00917824	27	21.7	21.9	20.2	20.6
	0.00918981	27.1	21.9	22.3	20.7	20.6
	0.00920139	27.2	22.1	22.5	20.9	20.7
	0.00921296	27.3	22.4	22.7	21	20.7
	0.00922454	27.4	22.7	22.9	21.3	20.8
	0.00923611	27.4	23.1	23.1	21.6	20.8
	0.00924769	27.5	23.5	23.5	21.9	20.9
	0.00925926	27.6	23.8	23.8	22.2	20.9
	0.00928241	27.6	24.1	24.1	22.6	21
	0.00929398	27.7	24.4	24.3	22.9	21
	0.00930556	27.7	24.8	24.6	23.4	21.1
	0.00931713	27.8	25.1	24.9	23.8	21.2
	0.0093287	27.9	25.4	25	24.2	21.3
	0.00934028	27.9	25.6	25.3	24.4	21.4
	0.00935185	28	25.8	25.5	24.5	21.4
	0.00936343	28.1	26	25.7	24.7	21.4
	0.009375	28.1	26.1	26	24.9	21.5
	0.00938657	28.3	26.2	26.4	25.2	21.5
	0.00940972	28.3	26.3	26.8	25.5	21.6
	0.0094213	28.4	26.5	27.1	25.8	21.7
	0.00943287	28.5	26.6	27.4	26.2	21.8
	0.00944444	28.5	26.7	27.7	26.4	21.8
	0.00945602	28.6	26.8	27.9	26.8	21.9
	0.00946759	28.7	26.9	28	27	22
	0.00947917	28.7	26.9	28	27.2	22.1
	0.00949074	28.8	27	28.1	27.3	22.2
	0.00950231	28.8	27.1	28.1	27.6	22.2
	0.00951389	28.9	27.2	28.1	27.7	22.3
	0.00952546	28.9	27.2	28.2	27.8	22.4
	0.00953704	28.9	27.3	28.2	27.9	22.5
	0.00954861	29	27.3	28.3	28	22.7
	0.00956019	29	27.3	28.2	28.1	22.8
	0.00957176	29.1	27.4	28.1	28.2	22.9
	0.00958333	29.1	27.4	28.1	28.2	23
	0.00960648	29.2	27.5	28.1	28.3	23.1
	0.00961806	29.2	27.5	28.1	28.3	23.2
	0.00962963	29.3	27.5	28.2	28.4	23.3
	0.0096412	29.3	27.6	28.2	28.5	23.5
	0.00965278	29.3	27.6	28.2	28.5	23.6
	0.00966435	29.4	27.6	28.2	28.6	23.7
	0.00967593	29.5	27.7	28.1	28.6	23.8
	0.0096875	29.5	27.8	28.1	28.6	23.9
	0.00969907	29.6	27.8	28.1	28.7	24
	0.00971065	29.6	27.8	28.2	28.8	24.2
	0.00972222	29.7	27.8	28.3	28.8	24.2
	0.0097338	29.8	27.9	28.4	28.8	24.3
	0.00974537	29.8	27.9	28.3	29	24.4
	0.00975694	30	27.9	28.3	29.1	24.5
	0.00976852	30	27.9	28.3	29	24.6
	0.00979167	30.2	28	28.3	29	24.7
	0.00980324	30.2	27.9	28.2	28.9	24.8
	0.00981481	30.3	28	28.2	29	24.8
	0.00982639	30.4	28	28.2	28.9	24.9
	0.00983796	30.6	28	28.2	28.8	24.9
	0.00984954	30.7	28	28.2	28.8	24.9
	0.00986111	30.9	28	28.3	28.7	25.1
	0.00987269	31	28	28.3	28.7	25.1
	0.00988426	31.1	28	28.3	28.7	25.2
	0.00989583	31.2	28	28.3	28.6	25.3
	0.00990741	31.4	28.1	28.3	28.7	25.3
	0.00991898	31.4	28	28.4	28.7	25.5
	0.00993056	31.5	28.1	28.3	28.7	25.5
	0.00994213	31.6	28.1	28.2	28.8	25.7
	0.0099537	31.7	28	28.1	28.6	25.7
	0.00996528	31.7	28.1	28.1	28.6	25.8
	0.00997685	31.8	28.1	28.1	28.6	25.9
	0.00998843	31.8	28.1	28.1	28.7	26
	0.01	31.9	28.1	28.1	28.7	26.2
	0.0100116	31.9	28.1	28	28.6	26.3
	0.0100347	32	28.1	28	28.5	26.4
	0.0100463	32	28.1	28	28.5	26.5
	0.0100579	32	28.1	28.1	28.5	26.7
	0.0100694	32	28.1	28.1	28.5	26.9
	0.010081	32.1	28.1	28.1	28.5	27
	0.0100926	32.1	28.1	28.2	28.5	27.1
	0.0101042	32.1	28.1	28.2	28.6	27.3
	0.0101157	32.2	28.1	28.2	28.7	27.4
	0.0101273	32.2	28.1	28.2	28.7	27.5
	0.0101389	32.2	28.1	28.3	28.8	27.6
	0.0101505	32.2	28.2	28.3	28.9	27.7
	0.010162	32.3	28.1	28.4	28.9	27.8
	0.0101736	32.3	28.2	28.3	28.9	27.9
	0.0101852	32.3	28.2	28.3	28.8	27.9
	0.0101968	32.3	28.2	28.1	28.8	28
	0.0102083	32.4	28.2	28.1	28.8	27.9
	0.0102315	32.4	28.1	28.1	28.7	28
	0.0102431	32.4	28.1	28	28.7	28
	0.0102546	32.4	28.1	28.1	28.8	28
	0.0102662	32.4	28.1	28.1	28.8	28.1
	0.0102778	32.4	28.1	28.1	28.8	28.1
	0.0102894	32.4	28.1	28.1	28.8	28.1
	0.0103009	32.4	28.2	28.1	28.8	28.2
	0.0103125	32.4	28.2	28.1	28.8	28.2
	0.0103241	32.4	28.2	28.2	28.7	28.2
	0.0103356	32.4	28.2	28.2	28.7	28.2
	0.0103472	32.4	28.2	28.2	28.7	28.2
	0.0103588	32.4	28.2	28.3	28.7	28.2
	0.0103704	32.4	28.2	28.2	28.6	28.2
	0.0103819	32.4	28.2	28.3	28.6	28.2
	0.0103935	32.4	28.2	28.3	28.7	28.2
	0.0104051	32.4	28.2	28.4	28.7	28.2
	0.0104167	32.4	28.2	28.4	28.7	28.2
	0.0104398	32.4	28.2	28.3	28.7	28.2
	0.0104514	32.4	28.2	28.3	28.7	28.2
	0.010463	32.4	28.2	28.4	28.8	28.2
	0.0104745	32.4	28.3	28.6	28.8	28.3
	0.0104861	32.4	28.2	28.6	28.8	28.3
	0.0104977	32.4	28.3	28.5	28.8	28.3
	0.0105093	32.4	28.3	28.3	28.9	28.4
	0.0105208	32.4	28.2	28.3	29	28.4
	0.0105324	32.4	28.2	28.3	28.9	28.4
	0.010544	32.5	28.3	28.3	29	28.4
	0.0105556	32.5	28.3	28.3	29	28.5
	0.0105671	32.5	28.3	28.3	29	28.5
	0.0105787	32.5	28.3	28.3	29	28.5
	0.0105903	32.5	28.3	28.4	29.1	28.6
	0.0106019	32.5	28.4	28.5	29.1	28.6
	0.0106134	32.5	28.4	28.6	29.1	28.7
	0.010625	32.5	28.4	28.6	29.2	28.7
	0.0106481	32.5	28.4	28.6	29.2	28.7
	0.0106597	32.5	28.4	28.5	29.3	28.7
	0.0106713	32.6	28.4	28.5	29.4	28.7
	0.0106829	32.6	28.5	28.5	29.4	28.8
	0.0106944	32.6	28.5	28.5	29.5	28.8
	0.010706	32.6	28.5	28.5	29.5	28.8
	0.0107176	32.6	28.5	28.5	29.5	28.9
	0.0107292	32.6	28.5	28.5	29.5	28.9
	0.0107407	32.7	28.6	28.5	29.5	28.9
	0.0107523	32.7	28.6	28.4	29.4	28.9
	0.0107639	32.7	28.6	28.4	29.4	29
	0.0107755	32.7	28.6	28.3	29.3	29
	0.010787	32.7	28.6	28.3	29.3	29
	0.0107986	32.7	28.7	28.4	29.2	29
	0.0108102	32.7	28.7	28.4	29.1	28.9
	0.0108218	32.7	28.7	28.4	29	28.9
	0.0108333	32.7	28.7	28.4	29.1	28.9
	0.0108449	32.8	28.7	28.3	29.1	28.9
	0.0108681	32.8	28.8	28.2	29.1	28.9
	0.0108796	32.8	28.8	28.2	29	28.9
	0.0108912	32.8	28.8	28.2	29	28.9
	0.0109028	32.8	28.9	28.2	29	28.9
	0.0109144	32.8	28.9	28.2	29	28.9
	0.0109259	32.8	28.9	28.2	29	28.9
	0.0109375	32.8	28.9	28.1	29	28.9
	0.0109491	32.8	28.9	28.1	29	28.9
	0.0109606	32.8	28.9	28.1	28.9	28.9
	0.0109722	32.8	28.9	28.1	28.8	28.8
	0.0109838	32.8	28.9	28.1	28.8	28.7
	0.0109954	32.8	28.9	28.1	28.8	28.6
	0.0110069	32.8	28.9	28.2	28.8	28.5
	0.0110185	32.8	28.9	28.2	28.9	28.4
	0.0110301	32.7	29	28.3	28.8	28.3
	0.0110417	32.7	29.3	28.3	28.8	28.2
	0.0110532	32.8	29.1	28.4	28.9	28.2
	0.0110648	32.8	28.5	28.4	29	28.2
	0.0110764	32.7	27.7	28.4	29	28.2
	0.011088	32.7	26.7	28.4	28.9	28.1
	0.0110995	32.7	26	28.3	28.9	28.1
	0.0111227	32.7	25.4	28.2	29	28.1
	0.0111343	32.7	24.8	28.2	29	28.1
	0.0111458	32.8	24.4	28.1	29	28.1
	0.0111574	32.7	24	28.1	29	28.1
	0.011169	32.7	23.6	28.2	28.9	28.2
	0.0111806	32.7	23.3	28.2	29	28.3
	0.0111921	32.7	23	28.2	29.1	28.3
	0.0112037	32.7	22.8	28.3	29.1	28.4
	0.0112153	32.7	22.6	28.3	29.1	28.5
	0.0112269	32.7	22.4	28.3	29.3	28.6
	0.0112384	32.7	22.2	28.3	29.3	28.7
	0.01125	32.7	22.1	28.3	29.4	28.7
	0.0112616	32.7	21.9	28.3	29.5	28.8
	0.0112847	32.7	21.7	28.4	29.4	28.9
	0.0112963	32.7	21.6	28.3	29.3	28.9
	0.0113079	32.7	21.5	28.3	29.3	28.9
	0.0113194	32.7	21.4	28.3	29.3	28.9
	0.0113426	32.7	21.3	28.2	29.3	28.9
	0.0113542	32.7	21.2	28.2	29.3	28.9
	0.0113657	32.7	21.1	28.2	29.3	29
	0.0113773	32.7	21	28.2	29.3	29
	0.0113889	32.7	21	28.3	29.3	29
	0.0114005	32.7	21	28.2	29.3	29
	0.011412	32.7	20.9	28.1	29.3	29
	0.0114236	32.7	20.8	28.1	29.3	29.1
	0.0114352	32.7	20.7	28	29.1	29
	0.0114468	32.7	20.7	28.1	29.2	29
	0.0114583	32.7	20.6	28.1	29.2	29
	0.0114699	32.7	20.5	28.1	29.2	29.1
	0.0114815	32.7	20.5	28.1	29.2	29.1
	0.0114931	32.7	20.4	28.1	29.2	29.1
	0.0115046	32.7	20.4	28.1	29.3	29.1
	0.0115278	32.7	20.3	28.2	29.2	29.1
	0.0115394	32.7	20.3	28.2	29.1	29
	0.0115509	32.6	20.3	28.2	29	29
	0.0115625	32.7	20.3	28.2	29	29
	0.0115741	32.6	20.2	28.2	28.9	28.9
	0.0115856	32.6	20.2	28.3	28.9	28.9
	0.0115972	32.6	20.3	28.2	28.9	28.9
	0.0116088	32.6	20.3	28.3	28.9	28.8
	0.0116204	32.6	20.3	28.3	28.8	28.8
	0.0116319	32.6	20.2	28.3	28.8	28.8
	0.0116435	32.6	20.2	28.2	28.8	28.8
	0.0116551	32.6	20.1	28.2	28.8	28.8
	0.0116667	32.6	20.1	28.3	28.9	28.8
	0.0116782	32.6	20.1	28.4	29	28.8
	0.0116898	32.6	20.1	28.4	29	28.8
	0.0117014	32.5	20	28.4	29	28.8
	0.011713	32.5	20.1	28.4	29	28.8
	0.0117361	32.5	20.1	28.4	29.1	28.9
	0.0117477	32.5	20.1	28.4	29	28.9
	0.0117593	32.5	20.1	28.5	29.1	28.9
	0.0117708	32.5	20.1	28.5	29.2	28.9
	0.0117824	32.5	20.1	28.4	29.2	29
	0.011794	32.5	20.1	28.4	29.3	29
	0.0118056	32.5	20.1	28.4	29.3	29
	0.0118171	32.5	20.1	28.4	29.3	29.1
	0.0118287	32.5	20.1	28.3	29.3	29.1
	0.0118403	32.5	20	28.3	29.2	29.1
	0.0118519	32.5	20.1	28.2	29.2	29.1
	0.0118634	32.6	20.1	28.2	29.3	29.1
	0.011875	32.6	20	28.2	29.3	29.1
	0.0118866	32.5	19.9	28.1	29.3	29.1
	0.0118981	32.5	19.9	28.1	29.2	29.1
	0.0119097	32.5	19.9	28.2	29.1	29.1
	0.0119213	32.5	19.8	28.2	29	29
	0.0119329	32.5	19.8	28.2	29	29
	0.0119444	32.5	19.8	28.2	29	29
	0.011956	32.5	19.9	28.2	29	29
	0.0119676	32.5	19.9	28.2	29	29
	0.0119907	32.5	19.9	28.2	29	29
	0.0120023	32.5	19.9	28.2	29	29
	0.0120139	32.5	19.9	28.2	29	29
	0.0120255	32.5	19.9	28.2	29	29
	0.012037	32.5	19.9	28.2	29	29
	0.0120486	32.5	19.9	28.2	29	29
	0.0120602	32.5	19.9	28.3	29.1	29
	0.0120718	32.5	19.9	28.3	29.1	29
	0.0120833	32.5	19.9	28.3	29	29
	0.0120949	32.5	20	28.4	29	29
	0.0121065	32.5	19.9	28.3	29.1	29
	0.0121181	32.5	19.9	28.3	29.2	29
	0.0121412	32.5	19.9	28.2	29.2	29
	0.0121528	32.5	19.9	28.1	29.3	29.1
	0.0121644	32.5	19.9	28.1	29.3	29.1
	0.0121759	32.5	19.8	28.2	29.2	29.1
	0.0121875	32.5	19.8	28.2	29.2	29.1
	0.0121991	32.5	19.8	28.2	29.2	29.1
	0.0122106	32.5	19.8	28.2	29.2	29.1
	0.0122222	32.5	19.8	28.2	29.3	29.1
	0.0122338	32.5	19.7	28.2	29.3	29.1
	0.0122454	32.5	19.8	28.2	29.3	29.1
	0.0122569	32.5	19.8	28.3	29.3	29.1
	0.0122685	32.5	19.8	28.3	29.3	29.2
	0.0122801	32.5	19.8	28.4	29.4	29.2
	0.0122917	32.5	19.8	28.2	29.3	29.2
	0.0123032	32.5	19.8	28.2	29.4	29.2
	0.0123148	32.5	19.8	28.1	29.3	29.3
	0.0123264	32.5	19.9	28.1	29.3	29.3
	0.012338	32.5	19.9	28.1	29.3	29.3
	0.0123495	32.5	19.9	28.1	29.2	29.2
	0.0123611	32.5	19.9	28.2	29.3	29.3
	0.0123727	32.5	19.9	28.2	29.3	29.2
	0.0123843	32.5	19.8	28.2	29.3	29.2
	0.0123958	32.5	19.9	28.2	29.3	29.2
	0.0124074	32.5	19.9	28.2	29.3	29.2
	0.0124306	32.5	19.9	28.1	29.3	29.2
	0.0124421	32.5	19.8	28.1	29.4	29.2
	0.0124537	32.5	19.8	28.1	29.4	29.2
	0.0124653	32.5	19.8	28.1	29.3	29.3
	0.0124769	32.5	19.8	28.2	29.2	29.2
	0.0124884	32.5	19.7	28.2	29.2	29.2
	0.0125	32.5	19.8	28.2	29.2	29.2
	0.0125116	32.5	19.7	28.3	29.2	29.2
	0.0125231	32.5	19.7	28.4	29.2	29.2
	0.0125347	32.5	19.8	28.4	29.1	29.2
	0.0125463	32.5	19.7	28.4	29.1	29.1
	0.0125579	32.5	19.7	28.4	29	29.1
	0.0125694	32.5	19.7	28.4	29	29.1
	0.012581	32.4	19.8	28.4	28.9	29
	0.0125926	32.5	19.8	28.4	28.9	29
	0.0126042	32.4	19.8	28.3	29	29
	0.0126157	32.4	19.8	28.3	29	29
	0.0126273	32.4	19.7	28.3	29	29
	0.0126389	32.4	19.8	28.3	29.1	29
	0.012662	32.4	19.7	28.3	29.2	29.1
	0.0126736	32.4	19.7	28.2	29.2	29.1
	0.0126852	32.4	19.7	28.1	29.3	29.1
	0.0126968	32.4	19.7	28.1	29.2	29.1
	0.0127083	32.4	19.7	28.1	29.1	29.1
	0.0127199	32.4	19.7	28.1	29	29.1
	0.0127315	32.4	19.7	28.1	29	29
	0.0127431	32.4	19.7	28.1	28.9	29
	0.0127662	32.4	19.7	28.1	28.8	29
	0.0127778	32.4	19.7	28.1	28.9	29
	0.0127894	32.4	19.7	28.1	29	29
	0.0128009	32.4	19.7	28.1	29	29
	0.0128125	32.4	19.7	28.1	29.1	29
	0.0128241	32.4	19.7	28.1	29.1	29
	0.0128356	32.4	19.7	28.2	29.1	29
	0.0128472	32.4	19.7	28.1	29.1	29.1
	0.0128588	32.4	19.6	28.1	29.1	29.1
	0.0128704	32.4	19.6	28.1	29	29.1
	0.0128819	32.4	19.7	28.2	29	29.1
	0.0128935	32.4	19.7	28.3	29	29
	0.0129167	32.4	19.7	28.2	29.1	29.1
	0.0129282	32.4	19.6	28.2	29	29.1
	0.0129398	32.4	19.6	28.2	29	29
	0.0129514	32.4	19.6	28.2	28.9	29
	0.012963	32.4	19.7	28.2	29	29
	0.0129745	32.4	19.7	28.2	29.1	29
	0.0129861	32.4	19.7	28.2	29.1	29
	0.0130093	32.4	19.7	28.2	29	29
	0.0130208	32.4	19.7	28.2	29	29
	0.0130324	32.4	19.7	28.3	29	28.9
	0.013044	32.4	19.7	28.3	28.9	28.9
	0.0130556	32.4	19.7	28.3	29	28.9
	0.0130671	32.4	19.7	28.3	29	28.9
	0.0130787	32.4	19.8	28.4	29.1	29
	0.0130903	32.4	19.8	28.4	29.1	29
	0.0131019	32.4	19.8	28.3	29.1	29
	0.0131134	32.4	19.8	28.3	29	29
	0.013125	32.4	19.8	28.3	28.9	28.9
	0.0131366	32.4	19.9	28.3	28.9	28.9
	0.0131481	32.4	19.8	28.4	28.9	28.9
	0.0131597	32.4	19.9	28.3	28.9	28.9
	0.0131713	32.4	19.9	28.3	28.9	28.9
	0.0131829	32.4	19.9	28.3	28.8	28.9
	0.013206	32.4	19.9	28.3	28.8	28.8
	0.0132176	32.4	20	28.2	28.9	28.9
	0.0132292	32.4	20	28.2	28.9	28.9
	0.0132407	32.4	20	28.3	28.8	28.9
	0.0132523	32.3	20	28.3	28.8	28.9
	0.0132639	32.4	20	28.4	28.8	28.8
	0.0132755	32.4	20	28.5	28.9	28.9
	0.013287	32.4	20.1	28.5	28.9	28.8
	0.0132986	32.4	20.1	28.6	29	28.9
	0.0133102	32.4	20.1	28.5	29	28.9
	0.0133218	32.4	20.1	28.6	29.1	28.9
	0.0133333	32.4	20.1	28.7	29.1	29
	0.0133449	32.4	20.1	28.7	29.2	29
	0.0133565	32.4	20.2	28.8	29.2	29
	0.0133681	32.4	20.2	28.9	29.2	29
	0.0133796	32.4	20.2	28.9	29.2	29
	0.0134028	32.4	20.2	28.7	29.3	29.1
	0.0134144	32.4	20.2	28.6	29.3	29.1
	0.0134259	32.4	20.3	28.6	29.4	29.1
	0.0134375	32.5	20.3	28.6	29.3	29.1
	0.0134491	32.5	20.3	28.6	29.3	29.1
	0.0134606	32.5	20.3	28.5	29.2	29.1
	0.0134722	32.5	20.3	28.6	29.2	29.1
	0.0134838	32.5	20.4	28.5	29.1	29.1
	0.0134954	32.5	20.4	28.4	29.1	29.1
	0.0135069	32.5	20.4	28.3	29.1	29.1
	0.0135185	32.5	20.4	28.3	29.1	29.1
	0.0135301	32.5	20.4	28.3	29.2	29.1
	0.0135417	32.5	20.4	28.3	29.2	29.1
	0.0135648	32.5	20.4	28.3	29.1	29.1
	0.0135764	32.5	20.4	28.3	29.2	29.1
	0.013588	32.5	20.5	28.4	29.2	29.1
	0.0135995	32.5	20.5	28.4	29.1	29.1
	0.0136111	32.5	20.5	28.4	29.1	29.2
	0.0136227	32.5	20.6	28.3	29.2	29.2
	0.0136343	32.5	20.6	28.3	29.2	29.2
	0.0136458	32.5	20.6	28.3	29.2	29.2
	0.0136574	32.5	20.6	28.3	29.3	29.2
	0.013669	32.5	20.7	28.4	29.3	29.3
	0.0136806	32.5	20.7	28.3	29.3	29.3
	0.0136921	32.5	20.7	28.3	29.3	29.3
	0.0137037	32.5	20.7	28.3	29.2	29.2
	0.0137153	32.5	20.7	28.3	29.1	29.2
	0.0137384	32.5	20.8	28.2	29.1	29.2
	0.01375	32.5	20.8	28.2	29.2	29.2
	0.0137616	32.5	20.8	28.2	29.2	29.2
	0.0137731	32.5	20.9	28.2	29.1	29.2
	0.0137847	32.5	20.9	28.3	29.2	29.2
	0.0137963	32.5	20.9	28.3	29.1	29.2
	0.0138079	32.5	20.9	28.3	29.1	29.2
	0.0138194	32.5	21	28.4	29.1	29.2
	0.013831	32.5	21	28.4	29.1	29.2
	0.0138426	32.5	21.1	28.4	29.2	29.3
	0.0138542	32.5	21.1	28.4	29.3	29.2
	0.0138657	32.5	21.2	28.4	29.4	29.2
	0.0138773	32.5	21.2	28.4	29.4	29.3
	0.0139005	32.5	21.2	28.5	29.3	29.2
	0.013912	32.5	21.2	28.6	29.3	29.2
	0.0139236	32.5	21.3	28.6	29.3	29.2
	0.0139352	32.5	21.4	28.6	29.2	29.2
	0.0139468	32.5	21.4	28.6	29.2	29.2
	0.0139583	32.5	21.5	28.5	29.3	29.2
	0.0139699	32.5	21.5	28.5	29.2	29.2
	0.0139815	32.5	21.6	28.4	29	29.1
	0.0139931	32.5	21.6	28.4	29	29
	0.0140046	32.5	21.6	28.5	29	29
	0.0140162	32.5	21.6	28.5	28.9	29
	0.0140278	32.5	21.7	28.5	29	29
	0.0140509	32.5	21.7	28.5	29	29
	0.0140625	32.5	21.7	28.5	28.9	29
	0.0140741	32.5	21.8	28.5	29	29
	0.0140856	32.5	21.8	28.4	29.1	29
	0.0140972	32.5	21.9	28.4	29.1	29
	0.0141088	32.5	21.9	28.4	29	29
	0.0141204	32.5	22	28.5	28.9	29
	0.0141319	32.5	22.1	28.4	28.9	28.9
	0.0141435	32.5	22.2	28.4	28.8	28.9
	0.0141551	32.5	22.1	28.5	28.9	28.9
	0.0141667	32.5	22.2	28.5	28.9	28.9
	0.0141782	32.5	22.3	28.5	28.9	28.9
	0.0141898	32.5	22.3	28.4	28.9	28.9
	0.0142014	32.5	22.4	28.4	29	29
	0.0142245	32.5	22.4	28.3	29	29
	0.0142477	32.5	22.5	28.3	29	29
	0.0142593	32.5	22.6	28.4	29.1	29.1
	0.0142708	32.5	22.6	28.3	29.1	29.1
	0.0142824	32.5	22.6	28.3	29.1	29.1
	0.014294	32.5	22.7	28.3	29	29.1
	0.0143056	32.5	22.7	28.3	29.1	29.1
	0.0143171	32.5	22.8	28.2	29.1	29.1
	0.0143287	32.5	22.8	28.2	29.2	29.1
	0.0143403	32.5	22.8	28.2	29.2	29.1
	0.0143519	32.5	22.9	28.2	29.2	29.2
	0.0143634	32.5	22.9	28.3	29.2	29.2
	0.014375	32.5	22.9	28.4	29.2	29.2
	0.0143866	32.5	23	28.5	29.2	29.2
	0.0143981	32.5	23	28.5	29.2	29.2
	0.0144097	32.5	23	28.5	29.2	29.2
	0.0144329	32.5	23.1	28.5	29.4	29.2
	0.0144444	32.5	23.1	28.5	29.4	29.3
	0.014456	32.5	23.2	28.4	29.3	29.2
	0.0144676	32.5	23.2	28.4	29.4	29.2
	0.0144792	32.5	23.2	28.4	29.4	29.3
	0.0144907	32.5	23.4	28.5	29.4	29.3
	0.0145023	32.5	23.4	28.5	29.4	29.3
	0.0145139	32.5	23.4	28.6	29.4	29.3
	0.0145255	32.5	23.5	28.6	29.5	29.3
	0.014537	32.5	23.5	28.7	29.5	29.3
	0.0145486	32.5	23.6	28.6	29.5	29.4
	0.0145602	32.5	23.6	28.7	29.5	29.3
	0.0145718	32.5	23.7	28.6	29.4	29.3
	0.0145833	32.5	23.7	28.6	29.3	29.3
	0.0146065	32.5	23.7	28.7	29.3	29.3
	0.0146181	32.5	23.7	28.6	29.2	29.2
	0.0146296	32.5	23.8	28.5	29.1	29.2
	0.0146412	32.5	23.8	28.4	29.2	29.2
	0.0146528	32.5	23.9	28.4	29.2	29.2
	0.0146644	32.4	23.9	28.3	29.2	29.2
	0.0146759	32.5	23.9	28.3	29.3	29.2
	0.0146875	32.5	24	28.2	29.3	29.2
	0.0146991	32.5	24	28.2	29.2	29.2
	0.0147106	32.5	24	28.3	29.2	29.2
	0.0147222	32.4	24.1	28.4	29.2	29.2
	0.0147338	32.4	24.1	28.4	29.2	29.2
	0.0147454	32.5	24.2	28.4	29.1	29.1
	0.0147569	32.5	24.2	28.4	29.1	29.1
	0.0147685	32.5	24.3	28.3	29.1	29.1
	0.0147801	32.4	24.3	28.3	29.2	29.1
	0.0147917	32.4	24.3	28.2	29.2	29.1
	0.0148032	32.5	24.3	28.2	29.1	29.1
	0.0148148	32.4	24.4	28.2	29.1	29.1
	0.0148264	32.5	24.4	28.2	29.2	29.1
	0.014838	32.5	24.4	28.1	29.1	29.1
	0.0148495	32.4	24.5	28.2	29	29.1
	0.0148611	32.4	24.5	28.1	29.2	29.2
	0.0148727	32.4	24.5	28.2	29.2	29.2
	0.0148958	32.4	24.5	28.2	29.3	29.2
	0.0149074	32.4	24.6	28.2	29.3	29.2
	0.014919	32.4	24.6	28.3	29.3	29.2
	0.0149306	32.5	24.7	28.3	29.2	29.2
	0.0149421	32.4	24.7	28.3	29	29.2
	0.0149537	32.5	24.7	28.2	28.9	29.1
	0.0149653	32.4	24.7	28.1	28.8	29
	0.0149769	32.4	24.8	28.1	28.8	29
	0.0149884	32.4	24.9	28.1	28.7	29
	0.015	32.4	24.9	28.1	28.7	29
	0.0150116	32.4	24.9	28.1	28.8	28.9
	0.0150231	32.4	24.9	28.2	28.7	28.9
	0.0150463	32.4	24.9	28.3	28.8	28.9
	0.0150579	32.4	25	28.2	29	29
	0.0150694	32.4	25.1	28.2	29	29
	0.015081	32.3	25.1	28.2	29.1	29
	0.0150926	32.4	25.1	28.2	29.1	29
	0.0151042	32.4	25.1	28.2	29.1	29.1
	0.0151157	32.3	25.1	28.2	29.2	29.1
	0.0151273	32.4	25.2	28.2	29.2	29.1
	0.0151389	32.4	25.2	28.3	29.3	29.1
	0.0151505	32.4	25.2	28.3	29.2	29.1
	0.015162	32.3	25.3	28.2	29.3	29.2
	0.0151736	32.4	25.3	28.2	29.3	29.2
	0.0151852	32.4	25.3	28.2	29.2	29.2
	0.0151968	32.4	25.3	28.2	29.1	29.2
	0.0152083	32.4	25.4	28.2	29.1	29.2
	0.0152199	32.4	25.4	28.3	29	29.1
	0.0152315	32.3	25.4	28.3	29	29.1
	0.0152431	32.3	25.5	28.3	29.1	29.1
	0.0152662	32.4	25.5	28.3	29.1	29.1
	0.0152778	32.3	25.5	28.3	29.1	29.1
	0.0152894	32.3	25.5	28.3	29.1	29.1
	0.0153009	32.3	25.6	28.3	29.1	29.2
	0.0153125	32.3	25.6	28.3	29.2	29.2
	0.0153241	32.3	25.6	28.3	29.2	29.2
	0.0153356	32.3	25.6	28.3	29.2	29.2
	0.0153472	32.3	25.7	28.3	29.2	29.2
	0.0153588	32.3	25.7	28.3	29.1	29.2
	0.0153704	32.3	25.7	28.3	29.1	29.2
	0.0153819	32.3	25.8	28.2	29	29.1
	0.0153935	32.3	25.8	28.2	28.9	29.1
	0.0154051	32.3	25.8	28.2	28.9	29.1
	0.0154167	32.3	25.8	28.2	28.8	29
	0.0154282	32.3	25.8	28.2	28.7	29
	0.0154398	32.3	25.8	28.2	28.6	28.9
	0.015463	32.3	25.9	28.2	28.6	28.9
	0.0154745	32.2	25.9	28.3	28.7	28.9
	0.0154861	32.3	26	28.3	28.7	28.9
	0.0154977	32.3	25.9	28.3	28.7	28.8
	0.0155093	32.3	26	28.3	28.6	28.8
	0.0155208	32.3	26	28.3	28.6	28.8
	0.0155324	32.2	26	28.2	28.5	28.8
	0.015544	32.2	26.1	28.2	28.6	28.8
	0.0155556	32.2	26.1	28.3	28.6	28.7
	0.0155671	32.2	26.1	28.2	28.6	28.7
	0.0155787	32.2	26.1	28.2	28.6	28.7
	0.0155903	32.2	26.1	28.1	28.6	28.7
	0.0156019	32.2	26.2	28.1	28.6	28.7
	0.0156134	32.2	26.2	28.1	28.7	28.8
	0.015625	32.2	26.2	28.1	28.7	28.8
	0.0156481	32.2	26.2	28.2	28.8	28.8
	0.0156597	32.2	26.2	28.2	28.8	28.8
	0.0156713	32.2	26.2	28.2	28.9	28.9
	0.0156829	32.2	26.2	28.3	29	28.9
	0.0156944	32.2	26.3	28.3	29	28.9
	0.015706	32.2	26.3	28.4	29.1	28.9
	0.0157176	32.3	26.3	28.4	29.1	29
	0.0157292	32.2	26.3	28.4	29.1	29
	0.0157407	32.3	26.4	28.3	29.1	29
	0.0157523	32.3	26.4	28.3	29.2	29
	0.0157639	32.3	26.4	28.3	29.3	29.1
	0.0157755	32.3	26.4	28.3	29.3	29.1
	0.015787	32.2	26.4	28.3	29.3	29.1
	0.0157986	32.3	26.5	28.3	29.3	29.1
	0.0158218	32.3	26.5	28.3	29.3	29.2
	0.0158333	32.3	26.5	28.3	29.3	29.2
	0.0158449	32.3	26.5	28.4	29.3	29.2
	0.0158565	32.3	26.5	28.4	29.3	29.2
	0.0158681	32.3	26.6	28.4	29.3	29.2
	0.0158796	32.3	26.6	28.3	29.3	29.2
	0.0158912	32.3	26.6	28.3	29.4	29.3
	0.0159028	32.3	26.6	28.3	29.3	29.2
	0.0159144	32.3	26.6	28.2	29.4	29.3
	0.0159259	32.4	26.6	28.2	29.4	29.3
	0.0159375	32.4	26.6	28.2	29.4	29.3
	0.0159491	32.4	26.6	28.2	29.4	29.3
	0.0159606	32.4	26.7	28.2	29.4	29.3
	0.0159838	32.4	26.7	28.3	29.3	29.3
	0.0160069	32.4	26.7	28.3	29.2	29.3
	0.0160185	32.4	26.7	28.4	29.2	29.3
	0.0160301	32.4	26.7	28.4	29.2	29.3
	0.0160417	32.4	26.8	28.4	29.2	29.3
	0.0160532	32.4	26.8	28.5	29.1	29.3
	0.0160648	32.4	26.8	28.5	29.1	29.2
	0.0160764	32.4	26.8	28.4	28.9	29.1
	0.016088	32.4	26.8	28.3	28.8	29.1
	0.0161111	32.3	26.9	28.3	28.8	29
	0.0161227	32.3	26.9	28.2	28.8	29
	0.0161343	32.3	26.8	28.2	28.8	29
	0.0161458	32.3	26.9	28.2	28.8	29
	0.0161574	32.3	26.9	28.2	28.7	28.9
	0.016169	32.4	26.9	28.2	28.7	28.9
	0.0161806	32.3	26.9	28.2	28.6	28.9
	0.0161921	32.3	26.9	28.2	28.6	28.9
	0.0162153	32.1	26.9	28.3	28.3	29.2
	0.0162269	31.9	27	28.2	26.8	29
	0.01625	31.9	27	28.2	26.4	29
	0.0162616	31.8	27	28.3	26.3	29.1
	0.0162731	31.8	27	28.4	26.4	29.1
	0.0162847	31.7	27.1	28.4	26.5	29.2
	0.0162963	31.7	27.1	28.5	26.7	29.1
	0.0163079	31.7	27.1	28.5	27.1	29.1
	0.0163194	31.6	27.1	28.5	27.4	29.1
	0.0163426	31.3	27.1	28.5	27.6	29.1
	0.0163542	29.9	27.2	28.2	28.1	28.9
	0.0163773	27.3	27.5	28	25.7	28.7
	0.0163889	26.2	27.6	27.9	23.5	28.6
	0.0164005	25.5	27.7	27.8	22.2	28.6
	0.016412	24.9	27.9	27.7	22.3	28.4
	0.0164236	24.7	27.9	27.7	22.4	28.4
	0.0164352	24.5	28	27.6	22.4	28.4
	0.0164583	24.5	28	27.7	21.8	28.4
	0.0164699	24.4	28	27.7	21.6	28.4
	0.0164815	24.4	28	27.7	21.4	28.4
	0.0164931	24.4	28	27.7	21.2	28.4
	0.0165046	24.3	28	27.7	20.5	28.3
	0.0165162	24.2	28	27.8	20.3	28.3
	0.0165278	24.1	28	27.8	20.2	28.3
	0.0165394	24.1	28	27.8	19.9	28.2
	0.0165509	24.1	28	27.8	19.8	28.2
	0.0165625	24.1	28	27.8	19.6	28.1
	0.0165741	24.1	28.1	27.8	19.6	28.1
	0.0165856	24.2	28.2	27.9	19.6	28
	0.0165972	24.2	28.2	27.8	19.5	28
	0.0166088	24.3	28.2	27.8	19.4	28
	0.0166204	24.4	28.2	27.9	19.4	28
	0.0166435	24.3	28.1	27.9	19.4	28
	0.0166551	24.3	28.1	27.9	19.4	28
	0.0166667	24.3	28.1	28	19.4	28.1
	0.0166782	24.4	28.1	28	19.3	28.1
	0.0166898	24.4	28.1	28.1	19.3	28.2
	0.0167014	24.4	28.2	28.1	19.2	28.2
	0.016713	24.5	28.2	28.2	19.3	28.2
	0.0167245	24.4	28.1	28.2	19.2	28.1
	0.0167361	24.4	28	28.2	19.9	28.1
	0.0167477	24.3	27.4	28.2	22.4	28.1
	0.0167593	24.3	27	28.1	20.7	28.1
	0.0167708	24.3	26.9	28.1	19.8	28
	0.0167824	27.3	27.9	28.1	19.2	28
	0.016794	28	27.8	28.2	18.8	28
	0.0168056	28.1	27.8	28.2	18.8	28.1
	0.0168171	27.9	27.7	28.3	19.9	28.1
	0.0168287	27.7	27.6	28.3	19.9	28.2
	0.0168403	27.6	27.5	28.3	19.7	28.2
	0.0168519	27.4	27.4	28.4	19.4	28.2
	0.0168634	27.3	27.3	28.3	19.2	28.2
	0.016875	27.2	27.2	28.3	19.2	28.2
	0.0168981	27	27	28.4	19.2	28.1
	0.0169097	27	27	28.4	19.3	28.1
	0.0169213	26.9	26.9	28.4	19.5	28.1
	0.0169329	26.7	26.7	28.4	19.7	28.2
	0.0169444	26.6	26.6	28.3	19.9	28.2
	0.016956	26.5	26.6	28.3	20.1	28.3
	0.0169676	26.5	26.6	28.4	20.3	28.2
	0.0169792	26.3	26.5	28.2	20.6	28.1
	0.0169907	26.2	26.5	28.2	20.9	28.1
	0.0170023	26.1	26.3	28.1	21	28.1
	0.0170139	26	26.3	28.1	21.4	28.1
	0.0170255	26	26.3	28.1	21.6	28.1
	0.017037	25.9	26.2	28.1	22	28.1
	0.0170486	25.9	26.2	28.2	22.3	28
	0.0170718	25.8	26.1	28.1	22.5	28
	0.0170833	25.7	26	28.1	22.7	28
	0.0170949	25.7	26	28	22.9	28.1
	0.0171065	25.7	25.9	28	23.1	28.1
	0.0171181	25.7	25.9	28	23.2	28.2
	0.0171296	25.7	25.9	28	23.3	28.3
	0.0171412	25.7	25.9	28.1	23.5	28.4
	0.0171528	25.7	25.8	28.2	23.6	28.6
	0.0171644	25.6	25.8	28.2	23.7	28.6
	0.0171759	25.6	25.8	28.2	23.7	28.7
	0.0171991	25.5	25.8	28.1	23.6	28.7
	0.0172106	25.4	25.7	28.2	23.7	28.7
	0.0172222	25.4	25.6	28.2	23.8	28.7
	0.0172338	25.4	25.6	28.1	23.8	28.7
	0.0172454	25.4	25.5	28.2	23.7	28.7
	0.0172569	25.3	25.5	28.1	23.8	28.6
	0.0172685	25.4	25.6	28	23.9	28.5
	0.0172801	25.4	25.5	28	24	28.5
	0.0172917	25.4	25.5	28	24	28.4
	0.0173148	25.5	25.5	28.1	24.1	28.5
	0.017338	25.5	25.5	28	24.1	28.5
	0.0173495	25.5	25.5	28	24.3	28.5
	0.0173611	25.4	25.5	27.9	24.3	28.4
	0.0173727	25.4	25.4	27.9	24.2	28.4
	0.0173843	25.3	25.4	27.9	24.1	28.3
	0.0173958	25.2	25.4	27.9	24.1	28.3
	0.0174074	25.2	25.4	27.9	24.1	28.2
	0.017419	25.1	25.3	28	24.2	28.2
	0.0174306	25.1	25.3	28	24.1	28.2
	0.0174421	25	25.3	28	24.1	28.2
	0.0174537	25	25.3	27.9	24.1	28.2
	0.0174653	25	25.2	27.9	24	28.2
	0.0174884	25	25.1	27.9	24	28.2
	0.0175	24.9	25.1	27.9	24	28.1
	0.0175116	24.8	25.1	27.9	24	28.1
	0.0175231	24.7	25	27.8	24.1	28.1
	0.0175347	24.8	25	27.8	24.2	28.1
	0.0175463	24.8	24.9	27.8	24.1	28.1
	0.0175579	24.8	24.9	27.8	24.2	28.1
	0.0175694	24.8	24.9	27.7	24.3	28.1
	0.017581	24.8	24.9	27.6	24.4	28.1
	0.0175926	24.8	24.9	27.6	24.5	28
	0.0176042	24.8	24.8	27.6	24.6	28
	0.0176157	24.7	24.9	27.6	24.6	28.1
	0.0176273	24.7	24.8	27.6	24.7	28.1
	0.0176389	24.7	24.8	27.6	24.8	28.1
	0.0176505	24.8	24.8	27.6	24.7	28
	0.017662	24.8	24.8	27.6	24.8	28.1
	0.0176736	24.8	24.8	27.6	24.8	28.2
	0.0176852	24.9	24.7	27.6	24.8	28.2
	0.0176968	24.9	24.8	27.6	25	28.3
	0.0177083	24.9	24.8	27.6	25.1	28.2
	0.0177199	24.9	24.8	27.6	25.3	28.1
	0.0177315	24.9	24.8	27.6	25.6	28
	0.0177431	24.9	24.7	27.6	25.7	28
	0.0177546	24.8	24.7	27.6	25.8	27.9
	0.0177662	24.8	24.7	27.6	26	28
	0.0177778	24.9	24.7	27.6	26.2	28
	0.0177894	24.9	24.7	27.6	26.3	28
	0.0178125	24.8	24.7	27.7	26.5	28
	0.0178241	24.7	24.6	27.7	26.7	28
	0.0178356	24.6	24.7	27.6	27.1	28
	0.0178472	24.6	24.7	27.5	27.5	28.1
	0.0178588	24.6	24.7	27.5	27.7	28.1
	0.0178704	24.6	24.7	27.4	28.1	28.1
	0.0178819	24.6	24.7	27.4	28.3	28
	0.0178935	24.6	24.6	27.4	28.5	28
	0.0179051	24.6	24.6	27.4	28.7	28
	0.0179167	24.7	24.6	27.4	28.8	28
	0.0179282	24.7	24.8	27.4	28.9	28.1
	0.0179398	24.8	24.9	27.5	29	28.1
	0.0179514	24.7	25	27.4	29	28.1
	0.0179745	24.7	25.1	27.4	29.1	28.2
	0.0179861	24.7	25.1	27.4	29.2	28.2
	0.0179977	24.7	25.2	27.3	29.3	28.1
	0.0180093	24.6	25.2	27.2	29.3	28.1
	0.0180208	24.7	25.2	27.2	29.4	28.2
	0.0180324	24.7	25.2	27.2	29.5	28.3
	0.018044	24.7	25.3	27.2	29.5	28.5
	0.0180556	24.7	25.3	27.2	29.5	28.5
	0.0180787	24.7	25.4	27.2	29.6	28.4
	0.0180903	24.7	25.4	27.1	29.6	28.3
	0.0181019	24.6	25.4	27.1	29.5	28.1
	0.0181134	24.7	25.4	27.1	29.4	28.1
	0.018125	24.7	25.4	27.2	29.4	28
	0.0181366	24.7	25.5	27.2	29.3	28
	0.0181481	24.7	25.5	27.3	29.3	28.2
	0.0181597	24.7	25.5	27.3	29.4	28.3
	0.0181713	24.8	25.6	27.4	29.5	28.6
	0.0181829	24.8	25.7	27.5	29.6	28.6
	0.0181944	24.9	25.7	27.6	29.6	28.7
	0.018206	24.8	25.7	27.6	29.6	28.7
	0.0182176	24.8	25.7	27.6	29.6	28.6
	0.0182292	24.9	25.7	27.6	29.7	28.5
	0.0182407	24.2	25.7	26.5	29.6	28.4
	0.0182523	24.1	26	26.5	29.6	28.4
	0.0182639	24.1	26.1	28.1	29.7	28.5
	0.0182755	24.3	26.2	29.4	29.8	28.6
	0.018287	24.7	26.3	30.4	29.8	28.7
	0.0182986	25	26.3	31.3	29.9	28.8
	0.0183218	25.3	26.4	31	30	28.8
	0.0183333	25.6	26.4	30.4	30.2	28
	0.0183449	25.8	26.4	30.1	30.4	27.5
	0.0183565	26	26.2	28.6	30.6	27.1
	0.0183681	26.1	24.7	27.2	30.7	26.9
	0.0183796	26.2	23.1	25.9	30.8	26.7
	0.0183912	26.3	22.7	25.1	30.8	26.6
	0.0184028	26.4	22.8	24.4	30.8	26.5
	0.0184144	26.5	23.4	23.7	30.8	26.4
	0.0184259	26.5	23.9	23.4	31	26.1
	0.0184375	26.5	24.4	23	30.5	26.2
	0.0184491	26.5	25	22.8	27.1	26.3
	0.0184606	26.5	25.8	23	24.9	26.4
	0.0184722	26.5	26.5	23.3	24.1	26.5
	0.0184838	26.5	26.2	23.3	22.5	26.6
	0.0184954	26.6	26.6	23.2	21.4	25.9
	0.0185069	26.7	26.9	23.2	20.9	25.6
	0.0185301	26.8	27.2	23.3	20.5	25.7
	0.0185417	26.8	27.4	23.2	20.4	24.7
	0.0185532	26.9	27.4	23.2	20.5	24.3
	0.0185648	27	27.5	23.3	20.6	24.1
	0.0185764	27	27.6	23.4	21.1	24
	0.018588	27.1	27.6	23.5	21.3	23.9
	0.0185995	27.2	27.7	23.6	21.2	23.9
	0.0186111	27.2	27.7	23.7	21.2	24
	0.0186227	27.3	27.6	23.8	21.2	24.1
	0.0186343	27.5	27.7	23.9	21.2	24.2
	0.0186458	27.6	27.7	24	21.7	24.4
	0.0186574	27.6	27.7	24.1	22.1	24.6
	0.018669	27.7	27.7	24.3	22.4	24.8
	0.0186806	27.7	27.7	24.5	22.6	25.1
	0.0186921	27.8	27.6	24.6	22.8	25.4
	0.0187037	27.9	27.6	24.8	22.9	25.7
	0.0187153	27.9	27.6	24.9	23	26.1
	0.0187384	28	27.4	24.9	23	26.5
	0.01875	28	27.3	25	23.1	26.8
	0.0187616	28	27.2	25.2	23.2	27
	0.0187731	28	27.2	25.2	23.3	27.2
	0.0187847	28.1	27.2	25.3	23.4	27.4
	0.0187963	28.2	27.2	25.4	23.5	27.5
	0.0188079	28.2	27.3	25.5	23.6	27.6
	0.0188194	28.2	27.3	25.5	23.6	27.7
	0.018831	28.3	27.3	25.7	23.7	27.8
	0.0188426	28.4	27.4	25.7	23.7	27.9
	0.0188542	28.4	27.4	25.7	23.7	28
	0.0188657	28.5	27.5	25.8	23.8	28
	0.0188773	28.5	27.5	25.9	23.8	28.1
	0.0188889	28.5	27.6	25.9	23.8	28.1
	0.0189005	28.6	27.7	25.9	23.9	28.2
	0.0189236	28.7	27.8	26.1	23.9	28.2
	0.0189352	28.8	27.8	26.2	23.9	28.2
	0.0189468	28.8	27.9	26.2	24	28.3
	0.0189583	28.7	28.1	26.3	24.1	28.3
	0.0189699	28.7	28.2	26.3	24.1	28.3
	0.0189815	28.6	28.3	26.4	24.1	28.2
	0.0189931	28.6	28.5	26.5	24.1	28.2
	0.0190046	28.6	28.6	26.5	24.1	28.2
	0.0190162	28.5	28.8	26.6	24.1	28.2
	0.0190278	28.5	28.9	26.7	24.2	28.1
	0.0190394	28.6	28.9	26.8	24.2	28.1
	0.0190509	28.6	28.9	26.8	24.1	28.1
	0.0190625	28.6	29	26.9	24.2	28.1
	0.0190741	28.6	29	27	24.2	28.1
	0.0190856	28.7	29.1	27.1	24.2	28.1
	0.0191088	28.8	29.1	27.1	24.3	28.1
	0.0191204	28.9	29.1	27.2	24.3	28.1
	0.0191319	28.9	29.2	27.1	24.3	27.7
	0.0191435	28.9	29.2	27.1	24.4	26.4
	0.0191551	28.9	29.2	27.1	24.5	25.1
	0.0191667	28.9	29.3	27.2	24.5	23.5
	0.0191782	29	29.2	27.3	24.5	22.4
	0.0191898	29	29.3	27.3	24.5	22.2
	0.0192014	29.1	29.3	27.4	24.6	22.5
	0.0192245	29	29.3	27.3	24.6	22.9
	0.0192361	28.9	29.3	23.6	22.9	23.1
	0.0192477	28.4	29.4	23.1	21.1	23.3
	0.0192593	27.9	29.3	22.7	21.8	23.6
	0.0192708	27.5	29.5	23	20.7	23.9
	0.0192824	26.9	29.7	23.3	20.5	24.1
	0.019294	26.2	29.9	23.4	21.9	24.3
	0.0193056	25.8	30	23.6	21.9	24.4
	0.0193171	25.5	30.2	23.7	22	24.4
	0.0193287	25.2	30.3	23.8	22.3	24.6
	0.0193403	25	30.4	23.9	22.7	24.8
	0.0193519	24.9	30.3	23.9	22.9	24.8
	0.0193634	24.7	30.3	24	23.4	25
	0.019375	24.6	30.2	24	24	25.4
	0.0193866	24.6	30.3	23.9	24.4	25.7
	0.0193981	24.5	29.9	24	24.8	25.9
	0.0194097	24.4	28.6	24.1	25.3	26
	0.0194213	24.4	28	24.1	25.7	26.2
	0.0194444	24.3	27.1	24.1	26.3	26.4
	0.019456	24.3	27	24.1	26.7	26.6
	0.0194676	24.2	27	24.1	27.4	26.6
	0.0194792	24.2	27	24.2	27.8	26.8
	0.0194907	24.2	27.1	24.2	28.1	26.9
	0.0195023	24.2	27.2	24.2	28.4	27
	0.0195139	24.2	27.4	24.2	28.7	27.1
	0.0195255	24.2	27.5	24.2	28.9	27.2
	0.019537	24.1	27.7	24.3	29.1	27.3
	0.0195486	24	27.9	24.4	29.2	27.4
	0.0195602	24.1	28.1	24.5	29.4	27.4
	0.0195718	24.1	28.4	24.5	29.5	27.5
	0.0195833	24.1	28.6	24.6	29.6	27.5
	0.0195949	24.2	28.8	24.7	29.6	27.5
	0.0196065	24.2	29	24.8	29.7	27.6
	0.0196181	24.2	29.2	24.9	29.8	27.7
	0.0196296	24.2	29.3	24.9	29.8	27.8
	0.0196412	24.2	29.4	24.9	29.8	27.8
	0.0196644	24.2	29.6	24.9	29.9	27.8
	0.0196759	24.1	29.6	24.9	29.9	27.9
	0.0196875	24.1	29.7	25	29.9	28
	0.0196991	24.1	29.8	25.1	30	28.1
	0.0197106	24.2	29.9	25.1	30	28.1
	0.0197222	24.2	29.9	25.2	30	28.2
	0.0197338	24.2	30	25.3	30.1	28.2
	0.0197454	24.3	30	25.4	30.1	28.2
	0.0197569	24.3	30	25.5	30.1	28.2
	0.0197685	24.4	30	25.6	30.1	28.3
	0.0197801	24.4	30	25.8	30.1	28.3
	0.0198032	24.5	30.1	25.8	30.2	28.2
	0.0198148	24.5	30.2	26	30.2	28.2
	0.0198264	24.6	30.2	26	30.2	28.1
	0.019838	24.6	30.3	26.1	30.2	28.1
	0.0198495	24.6	30.3	26.2	30.2	28
	0.0198611	24.7	30.3	26.3	30.2	28
	0.0198843	24.7	30.3	26.4	30.3	28
	0.0198958	24.7	30.3	26.4	30.2	28.1
	0.0199074	24.8	30.4	26.5	30.3	28.1
	0.019919	24.8	30.4	26.6	30.3	28.1
	0.0199306	24.8	30.4	26.7	30.3	28.1
	0.0199421	24.8	30.4	26.8	30.3	28.2
	0.0199537	24.8	30.4	26.8	30.4	28.2
	0.0199653	24.9	30.4	26.9	30.4	28.2
	0.0199769	25	30.5	27	30.3	28.3
	0.0199884	25	30.5	27.1	30.4	28.3
	0.02	24.9	30.5	27.2	30.4	28.3
	0.0200116	26.1	30.5	27.2	30.4	28.3
	0.0200231	26.9	30.5	27.3	30.4	28.3
	0.0200463	27.9	30.5	27.4	30.5	28.3
	0.0200579	28.5	30.5	27.5	30.5	28.3
	0.0200694	28.9	30.5	27.6	30.5	28.3
	0.020081	29.2	30.6	27.7	30.5	28.3
	0.0200926	29.5	30.6	27.7	30.5	28.2
	0.0201042	29.8	30.6	27.8	30.5	28.2
	0.0201157	29.7	30.6	27.9	30.4	28.2
	0.0201273	29.6	30.7	28	30.5	28.2
	0.0201389	29.6	30.7	28.1	30.5	28.2
	0.0201505	29.7	30.7	28.2	30.5	28.2
	0.020162	29.8	30.8	28.2	30.5	28.2
	0.0201736	29.8	30.7	28.2	30.5	28.2
	0.0201852	29.9	30.7	28.3	30.5	28.2
	0.0201968	29.9	30.7	28.3	30.5	28.2
	0.0202083	29.9	30.7	28.3	30.5	28.2
	0.0202199	29.9	30.7	28.4	30.5	28.2
	0.0202315	29.9	30.8	28.4	30.5	28.2
	0.0202431	29.9	30.8	28.4	30.5	28.2
	0.0202546	29.8	30.7	28.4	30.5	28.2
	0.0202662	29.8	30.8	28.5	30.5	28.3
	0.0202778	29.8	30.8	28.5	30.5	28.3
	0.0202894	29.9	30.7	28.5	30.5	28.3
	0.0203009	30.1	30.7	28.5	30.5	28.3
	0.0203125	30.3	30.7	28.5	30.5	28.4
	0.0203241	30.4	30.7	28.6	30.5	28.4
	0.0203356	30.5	30.7	28.6	30.5	28.4
	0.0203588	30.7	30.7	28.6	30.5	28.4
	0.0203704	30.7	30.7	28.6	30.5	28.4
	0.0203819	30.8	30.7	28.6	30.5	28.4
	0.0203935	30.9	30.6	28.6	30.5	28.4
	0.0204051	30.8	30.7	28.7	30.5	28.4
	0.0204167	30.8	30.7	28.7	30.5	28.4
	0.0204282	30.8	30.7	28.7	30.6	28.5
	0.0204398	30.9	30.7	28.7	30.6	28.4
	0.0204514	30.9	30.7	28.7	30.6	28.4
	0.020463	31.1	30.6	28.7	30.6	28.4
	0.0204745	31.2	30.7	28.7	30.6	28.4
	0.0204861	31.3	30.6	28.7	30.6	28.3
	0.0204977	31.4	30.7	28.7	30.6	28.3
	0.0205208	31.5	30.7	28.7	30.5	28.3
	0.020544	31.7	30.7	28.7	30.6	28.3
	0.0205556	31.8	30.7	28.8	30.6	28.3
	0.0205671	31.9	30.8	28.7	30.6	28.4
	0.0205787	31.9	30.9	28.7	30.6	28.3
	0.0205903	31.9	30.9	28.7	30.6	28.3
	0.0206019	31.9	30.8	28.8	30.6	28.3
	0.0206134	31.9	30.8	28.8	30.6	28.4
	0.020625	31.9	30.8	28.7	30.6	28.4
	0.0206366	31.9	30.8	28.8	30.6	28.4
	0.0206481	32	30.9	28.8	30.6	28.4
	0.0206597	32	30.8	28.8	30.6	28.4
	0.0206713	32	30.9	28.8	30.6	28.4
	0.0206829	32	30.9	28.8	30.6	28.4
	0.0206944	32	30.9	28.7	30.6	28.4
	0.020706	31.9	30.9	28.8	30.6	28.4
	0.0207176	31.9	30.9	28.8	30.6	28.3
	0.0207292	32	31	28.8	30.4	28.2
	0.0207523	32	31	28.8	30.1	28.2
	0.0207639	32	31	28.8	30.1	28.2
	0.0207755	32	31	28.8	29.9	28.2
	0.020787	32.1	31.1	28.8	29.7	28.3
	0.0207986	32.1	31.1	28.8	29.6	28.3
	0.0208102	32.2	31	28.8	29.4	28.3
	0.0208218	32.2	31	28.8	29.3	28.3
	0.0208333	32.3	31	28.8	29.2	28.3
	0.0208449	32.4	31	28.9	29.3	28.3
	0.0208565	32.6	31	28.8	29.3	28.4
	0.0208681	32.7	31	28.8	29.3	28.4
	0.0208912	32.8	31	28.9	29.4	28.5
	0.0209028	32.8	31	28.8	29.3	28.5
	0.0209144	32.9	31.1	28.9	29.3	28.5
	0.0209259	33	31	28.9	29.2	28.5
	0.0209375	33	31	28.9	29.2	28.5
	0.0209491	33	30.9	28.9	29.3	28.5
	0.0209606	33	30.9	28.9	29.3	28.5
	0.0209722	32.9	30.9	28.9	29.2	28.5
	0.0209838	32.8	30.8	28.8	29.2	28.6
	0.0209954	32.7	30.8	28.4	29.2	28.6
	0.0210069	32.4	30.8	28	29.3	28.5
	0.0210185	31.9	30.7	27.3	29.4	28.5
	0.0210301	31.6	30.7	27	29.4	28.6
	0.0210417	31.3	30.8	27	29.4	28.5
	0.0210532	31.1	30.8	27	29.4	28.5
	0.0210764	30.9	30.9	27.1	29.2	28.5
	0.021088	30.8	31	27	29.2	28.5
	0.0210995	30.8	30.9	26.9	29.2	28.4
	0.0211111	30.8	31	27	29.2	28.4
	0.0211227	30.8	30.9	26.3	29.1	28.3
	0.0211343	30.9	30.9	25.4	29.1	28.3
	0.0211458	31	30.9	24.9	29.1	28.2
	0.0211574	31.2	30.9	24.6	29.1	28.2
	0.021169	31.3	30.9	24	29.1	28.1
	0.0211806	31.3	30.9	23.7	29.1	28.1
	0.0211921	31.4	31	23.4	29.1	28.1
	0.0212037	31.4	31	23.2	29.1	28
	0.0212153	31.5	31	23.1	29.1	28
	0.0212269	31.5	31	23	29.1	28
	0.0212384	31.3	31	22.9	29.1	28
	0.02125	31.4	31	22.7	29	28
	0.0212731	31.4	31	22.7	29	28
	0.0212847	31.5	31	22.6	29	28.1
	0.0212963	31.6	31.1	22.6	29	28.1
	0.0213079	31.8	31.1	22.5	29	28.1
	0.0213194	31.9	31.1	22.5	29.1	28.1
	0.021331	31.9	31.1	22.4	29.1	28.1
	0.0213426	32	31.1	22.4	29.2	28.1
	0.0213542	32.1	31.1	22.3	29.2	28.1
	0.0213657	32	31.1	22.3	29.2	28.1
	0.0213773	32	31.1	22.3	29.2	28.2
	0.0213889	32	31.1	22.3	29.1	28.2
	0.0214005	32	31.1	22.3	29.1	28.2
	0.0214236	31.9	31	22.2	29	28.3
	0.0214352	31.9	31.1	22.2	29	28.3
	0.0214468	32	31.2	22.2	29.2	28.2
	0.0214583	32	31.1	22.2	29.2	28.3
	0.0214699	32.1	31.1	22.2	29.1	28.2
	0.0214815	32.1	31.1	22.2	29.2	28.3
	0.0214931	32.1	31.2	22.1	29.3	28.3
	0.0215046	32.1	31.2	22.1	29.3	28.2
	0.0215162	31.7	31.2	22	29.2	28.2
	0.0215278	31.2	31.2	22	29.2	28.2
	0.0215394	30.9	31.2	22	29.1	28.1
	0.0215509	30.8	31.2	21.9	29.1	28.1
	0.0215625	30.6	31.2	21.9	29.1	28.1
	0.0215741	30.4	31.2	21.9	29	28.1
	0.0215972	30.4	31.1	21.9	29	28.1
	0.0216204	30.2	31	21.8	29	28
	0.0216319	30.2	31	21.8	28.9	28
	0.0216435	30.2	31	21.8	28.9	28
	0.0216551	30.2	31	21.8	28.9	28.1
	0.0216667	30.2	31.1	21.8	28.8	28.1
	0.0216782	30.1	31.1	21.8	28.8	28.1
	0.0216898	30.1	31.1	21.7	28.8	28.2
	0.0217014	29.9	31.1	21.8	28.8	28.1
	0.021713	29.9	31.2	21.8	28.8	28.1
	0.0217245	30	31.2	21.7	28.9	28.1
	0.0217361	30	31.1	21.7	29	28
	0.0217477	30	31.1	21.7	29	28.1
	0.0217593	30	31.1	21.7	29.1	28.2
	0.0217708	30	31.1	21.6	29.1	28.2
	0.0217824	30	31.1	21.6	29.1	28.2
	0.021794	30	31.1	21.6	29.1	28.2
	0.0218056	30	31.1	21.6	29.1	28.1
	0.0218171	30.1	31.1	21.6	29	28.2
	0.0218287	30.1	31	21.6	29	28.1
	0.0218403	30.1	31.1	21.6	29	28
	0.0218634	30.1	31.1	21.6	29	27.9
	0.021875	30.1	31	21.6	29	27.8
	0.0218866	30	31	21.6	29.1	27.8
	0.0218981	30	31	21.6	29.1	27.8
	0.0219097	29.9	31	21.5	29.1	27.8
	0.0219213	29.7	31	21.5	29	27.8
	0.0219329	29.7	31	21.4	29	27.7
	0.0219444	29.6	30.9	21.4	28.9	27.7
	0.021956	29.6	30.9	21.5	28.9	27.8
	0.0219676	29.5	30.9	21.4	28.8	27.8
	0.0219792	29.5	30.9	21.4	28.8	27.9
	0.0219907	29.5	30.9	21.4	28.8	28
	0.0220023	29.5	30.9	21.4	28.8	28.1
	0.0220139	29.5	30.9	21.4	28.8	28.2
	0.0220255	29.6	30.9	21.4	28.9	28
	0.022037	29.6	30.9	21.4	28.9	28
	0.0220602	29.6	30.9	21.3	28.9	27.9
	0.0220718	29.6	30.9	21.3	29	27.9
	0.0220833	29.6	30.9	21.3	29	27.9
	0.0220949	29.6	30.9	21.3	29.1	27.9
	0.0221065	29.7	30.9	21.3	29.1	27.9
	0.0221181	29.7	30.9	21.3	29.2	27.9
	0.0221296	29.7	30.9	21.3	29.2	27.8
	0.0221412	29.7	30.9	21.3	29.2	27.8
	0.0221528	29.7	30.9	21.3	29.1	27.8
	0.0221644	29.7	30.9	21.3	29.1	27.8
	0.0221759	29.7	31	21.3	29	27.7
	0.0221875	29.6	31	21.3	28.9	27.8
	0.0221991	29.6	31	21.3	28.9	27.8
	0.0222106	29.6	31	21.3	28.8	27.8
	0.0222222	29.5	31	21.3	28.8	27.9
	0.0222338	29.5	31	21.3	28.7	27.9
	0.0222454	29.4	31	21.3	28.7	27.9
	0.0222569	29.4	31	21.4	28.7	28
	0.0222801	29.3	31.1	21.4	28.7	28
	0.0222917	29.3	31.1	21.4	28.7	28
	0.0223032	29.3	31.1	21.4	28.7	28
	0.0223148	29.3	31.1	21.4	28.7	28.1
	0.0223264	29.3	31.1	21.4	28.7	28.1
	0.022338	29.3	31.1	21.4	28.7	28.2
	0.0223495	29.3	31.1	21.4	28.6	28.1
	0.0223611	29.3	31.1	21.4	28.6	28.2
	0.0223727	29.2	31.2	21.4	28.6	28.3
	0.0223843	29.3	31.1	21.4	28.6	28.3
	0.0223958	29.2	31.1	21.4	28.7	28.3
	0.0224074	29.2	31.2	21.5	28.6	28.3
	0.0224306	29.2	31.1	21.5	28.6	28.3
	0.0224421	29.2	31.1	21.5	28.7	28.2
	0.0224537	29.2	31.1	21.4	28.6	28.1
	0.0224653	29.1	31	21.5	28.6	28
	0.0224769	29.1	31	21.5	28.6	28
	0.0224884	29.1	31	21.5	28.6	28
	0.0225	29.1	31	21.4	28.6	28
	0.0225116	29	31	21.4	28.6	27.9
	0.0225231	29	31	21.4	28.6	27.9
	0.0225347	29.1	31	21.4	28.6	27.9
	0.0225463	29	31	21.4	28.6	27.9
	0.0225579	29	31	21.4	28.6	28
	0.0225694	29	31	21.4	28.6	28
	0.022581	29	31	21.5	28.6	28
	0.0225926	29	31.1	21.4	28.6	28
	0.0226042	29	31	21.5	28.6	27.9
	0.0226157	29	31.1	21.5	28.6	28
	0.0226273	29	31.1	21.4	28.6	28
	0.0226389	29	31.1	21.5	28.6	28
	0.022662	29	31.1	21.4	28.6	28
	0.0226736	29	31.1	21.5	28.6	28
	0.0226852	29	31.1	21.5	28.6	27.9
	0.0226968	29	31	21.4	28.6	27.9
	0.0227083	29	31	21.4	28.6	27.9
	0.0227199	29	31	21.5	28.6	27.9
	0.0227315	29	31	21.5	28.6	28
	0.0227431	29	31	21.5	28.6	28
	0.0227546	29	31	21.5	28.6	28
	0.0227662	29	31	21.5	28.6	28
	0.0227778	29	31	21.5	28.6	28
	0.0227894	29.1	31	21.5	28.6	28
	0.0228009	29.1	30.9	21.5	28.7	28
	0.0228125	29.2	30.9	21.5	28.7	28
	0.0228241	29.2	30.9	21.5	28.8	27.9
	0.0228356	29.2	30.9	21.5	28.8	28
	0.0228472	29.2	30.9	21.4	28.9	28.1
	0.0228588	29.3	30.9	21.4	28.9	28.1
	0.0228704	29.3	30.9	21.4	29	28.1
	0.0228819	29.4	30.9	21.4	29	28.1
	0.0228935	29.5	30.9	21.4	29.1	28
	0.0229051	29.5	30.9	21.4	29.1	28
	0.0229282	29.6	30.9	21.4	29.1	28
	0.0229398	29.6	30.9	21.4	29.1	28
	0.0229514	29.6	30.9	21.4	29.1	28
	0.022963	29.6	30.9	21.3	29.1	28
	0.0229745	29.6	30.9	21.3	29.2	28
	0.0229861	29.6	31	21.3	29.1	28
	0.0229977	29.6	31	21.3	29.2	27.9
	0.0230093	29.6	31	21.3	29.1	28
	0.0230208	29.6	31	21.3	29.1	28
	0.0230324	29.6	31	21.3	29.1	27.9
	0.023044	29.7	31.1	21.3	29.1	27.8
	0.0230556	29.7	31	21.3	29	27.8
	0.0230671	29.7	31	21.2	29	27.8
	0.0230787	29.8	31	21.3	28.9	27.8
	0.0230903	29.8	31	21.2	28.9	27.8
	0.0231019	29.8	31	21.2	28.8	27.8
	0.0231134	29.8	30.9	21.2	28.8	27.7
	0.023125	29.8	30.9	21.2	28.8	27.7
	0.0231366	29.7	30.9	21.2	28.8	27.7
	0.0231597	29.6	31	21.1	28.7	27.7
	0.0231713	29.6	30.9	21.1	28.8	27.7
	0.0231829	29.5	30.9	21.1	28.8	27.7
	0.0231944	29.5	30.8	21.1	28.8	27.6
	0.023206	29.5	30.8	21.1	28.7	27.5
	0.0232176	29.4	30.8	21.1	28.7	27.5
	0.0232292	29.3	30.8	21	28.6	27.5
	0.0232407	29.2	30.8	21	28.5	27.5
	0.0232523	29.1	30.8	21	28.6	27.6
	0.0232755	29	30.7	21	28.7	27.6
	0.0232986	29	30.8	21	28.7	27.7
	0.0233102	29	30.8	21	28.7	27.8
	0.0233218	29.1	30.9	21	28.7	27.8
	0.0233333	29.1	30.9	21	28.7	27.9
	0.0233449	29.2	30.9	21	28.7	27.9
	0.0233565	29.2	30.9	21	28.7	27.9
	0.0233681	29.2	31	21	28.7	27.9
	0.0233796	29.1	31	21	28.7	27.9
	0.0233912	29.1	30.9	21.1	28.7	27.9
	0.0234028	29.1	31	21.1	28.7	27.9
	0.0234259	29.2	31	21.1	28.7	27.9
	0.0234491	29.2	30.9	21.1	28.7	27.9
	0.0234606	29.2	30.9	21.1	28.7	27.9
	0.0234722	29.2	30.9	21.1	28.7	27.9
	0.0234838	29.2	30.8	21.1	28.7	27.9
	0.0234954	29.1	30.9	21.1	28.8	27.9
	0.0235069	29.1	30.9	21.1	28.7	27.9
	0.0235185	29.1	31	21.1	28.7	27.9
	0.0235301	29.1	31	21.2	28.7	27.9
	0.0235417	29	31	21.2	28.7	27.8
	0.0235532	29.1	30.9	21.2	28.8	27.8
	0.0235648	29	30.8	21.2	28.7	27.9
	0.0235764	29	30.8	21.2	28.7	27.9
	0.023588	28.9	30.8	21.1	28.7	27.9
	0.0235995	28.9	30.9	21.1	28.7	27.9
	0.0236111	28.8	30.9	21.1	28.7	28
	0.0236343	28.8	30.9	21.1	28.7	28
	0.0236458	28.8	31	21.1	28.7	27.9
	0.023669	28.8	31	21.1	28.6	27.9
	0.0236806	28.8	31	21.1	28.6	28
	0.0236921	28.8	31	21.2	28.5	27.9
	0.0237037	28.9	31	21.2	28.5	27.9
	0.0237153	29	31	21.2	28.6	27.9
	0.0237269	29	31	21.1	28.6	27.8
	0.0237384	29	31	21.1	28.7	27.8
	0.02375	29.1	31	21.1	28.6	27.8
	0.0237616	29.1	31	21.1	28.7	27.7
	0.0237731	29.2	31	21.1	28.7	27.7
	0.0237847	29.2	31	21.1	28.6	27.7
	0.0237963	29.2	31.1	21.1	28.6	27.6
	0.0238079	29.2	31.1	21.1	28.6	27.6
	0.0238194	29.3	31.1	21.1	28.4	27.5
	0.023831	29.3	31.1	21.1	28.3	27.5
	0.0238426	29.2	31.1	21	28.2	27.4
	0.0238657	29.1	31	21	28.2	27.4
	0.0238773	29.1	31	21	28.2	27.5
	0.0238889	29	30.9	20.9	28.2	27.4
	0.0239005	28.9	30.9	20.9	28.2	27.4
	0.023912	28.9	30.9	20.9	28.2	27.4
	0.0239236	28.9	30.8	20.9	28.2	27.4
	0.0239352	28.9	30.9	20.9	28.2	27.5
	0.0239468	28.9	30.9	20.9	28.2	27.5
	0.0239583	29	30.9	20.9	28.2	27.6
	0.0239699	29	30.9	20.8	28.2	27.7
	0.0239815	29	30.9	20.8	28.3	27.8
	0.0239931	29	30.9	20.8	28.3	27.8
	0.0240046	29	30.9	20.8	28.3	27.8
	0.0240278	29	30.9	20.8	28.2	27.8
	0.0240394	28.9	30.9	20.8	28.2	27.8
	0.0240509	28.9	30.9	20.8	28.2	27.8
	0.0240625	28.9	30.9	20.9	28.2	27.8
	0.0240741	28.9	30.9	20.9	28.2	27.9
	0.0240972	28.9	30.9	20.9	28.3	27.9
	0.0241088	29	30.9	20.9	28.4	28
	0.0241204	29	30.9	20.9	28.4	28
	0.0241319	29	30.9	20.8	28.4	27.9
	0.0241435	29	30.9	20.9	28.5	27.8
	0.0241551	28.9	30.9	20.9	28.5	27.7
	0.0241667	28.9	30.9	20.9	28.4	27.7
	0.0241782	28.9	30.9	20.9	28.3	27.6
	0.0241898	28.9	30.9	20.9	28.3	27.7
	0.0242014	28.8	30.9	20.9	28.3	27.7
	0.024213	28.8	30.9	20.9	28.2	27.7
	0.0242245	28.8	30.9	20.9	28.2	27.7
	0.0242361	28.8	30.9	20.9	28.2	27.7
	0.0242477	28.8	31	20.9	28.3	27.7
	0.0242708	28.8	31	20.9	28.3	27.7
	0.0242824	28.8	31.1	20.9	28.3	27.7
	0.024294	28.9	31.1	20.9	28.3	27.7
	0.0243056	28.9	31	20.8	28.3	27.7
	0.0243171	28.9	31	20.8	28.3	27.7
	0.0243287	28.9	31	20.7	28.3	27.7
	0.0243403	29	30.9	20.7	28.3	27.6
	0.0243519	29	30.9	20.7	28.3	27.6
	0.0243634	29	30.9	20.7	28.4	27.6
	0.024375	29.1	30.9	20.7	28.4	27.6
	0.0243981	29.2	31	20.6	28.4	27.6
	0.0244097	29.3	31	20.6	28.5	27.6
	0.0244213	29.3	31	20.6	28.5	27.6
	0.0244444	29.3	31.1	20.6	28.4	27.7
	0.024456	29.4	31	20.6	28.5	27.6
	0.0244676	29.4	31	20.6	28.5	27.6
	0.0244792	29.5	30.9	20.6	28.6	27.6
	0.0244907	29.5	30.9	20.6	28.6	27.7
	0.0245023	29.5	30.9	20.5	28.6	27.7
	0.0245139	29.5	30.9	20.5	28.6	27.7
	0.0245255	29.5	31	20.5	28.7	27.7
	0.024537	29.6	30.9	20.5	28.6	27.7
	0.0245486	29.6	31	20.5	28.6	27.7
	0.0245602	29.6	31	20.4	28.6	27.7
	0.0245718	29.5	31	20.4	28.6	27.8
	0.0245833	29.5	31	20.5	28.6	27.8
	0.0246065	29.4	31	20.5	28.5	27.8
	0.0246181	29.4	31	20.5	28.5	27.9
	0.0246296	29.5	31.1	20.4	28.9	28
	0.0246412	29.7	31.1	20.4	29.1	28.1
	0.0246528	29.7	31.1	20.4	29.2	28.1
	0.0246644	29.8	31.2	20.5	29.4	28.2
	0.0246759	29.9	31.2	20.5	29.5	28.1
	0.0246875	29.8	31.2	20.5	29.6	28
	0.0246991	29.7	31.2	20.6	29.7	27.9
	0.0247106	29.7	31.3	20.6	29.7	27.9
	0.0247222	29.9	31.3	20.5	29.9	27.9
	0.0247454	30.1	31.3	20.5	30	27.9
	0.0247685	30.4	31.2	20.5	30.3	27.9
	0.0247801	30.6	31.2	20.5	30.5	27.9
	0.0247917	30.7	31.1	20.5	30.7	27.9
	0.0248032	30.8	31.1	20.5	30.7	27.9
	0.0248148	30.6	31	20.5	30.7	27.9
	0.0248264	30.5	31	20.6	30.8	27.9
	0.024838	30.4	31	20.6	30.9	27.9
[truncated: 561 more rows]

## Sheet: Fig4(D)
	Temperature mesurments in ex vivo bovine liver during 90W 10 minute microwave ablation
	Thermocouple Measurements							Ablation Probe Measurements
	Device Name:	OctTCTemp2000V2						Probe type:	LK 15
	Device Description:	Eight Channel Thermocouple Temperature Data Logger with Display						Probe settings:	40W, 10min, Liver
	Device ID:	MultiChannel
		Channel 2	Channel 4	Channel 6	Channel 8	Channel 10
	Normalized Time	Thermocouple 1 (°C)	Thermocouple 2 (°C)	Thermocouple 3 (°C)	Thermocouple 4 (°C)	Thermocouple 5 (°C)		Normalized Time	Temperature (°C)
	-2.31481e-05	32.9	32.2	32.8	33.8	32.9		-5.78704e-05	32
	-1.15741e-05	34.9	33.1	33.1	40.7	33.2		-4.62963e-05	31
	0	36	33.7	33.2	44.4	33.3		-3.47222e-05	31
	2.31482e-05	37.1	34.2	33.3	48.4	33.3		-2.31481e-05	32
	3.47222e-05	38.1	34.8	33.5	51.5	33.4		-1.15741e-05	31
	4.62963e-05	39.2	35.4	33.6	54.6	33.5		0	31
	5.78704e-05	40.2	35.9	33.7	57.2	33.5		0	31
	6.94444e-05	41.4	36.4	33.9	60.5	33.6		1.15741e-05	50
	8.10185e-05	42.4	36.9	34.1	64.5	33.6		2.31482e-05	65
	9.25926e-05	43.6	37.5	34.2	74.1	33.7		3.47222e-05	72
	0.000104167	44.9	38	34.4	81.1	33.7		4.62963e-05	79
	0.000115741	46	38.5	34.6	85.2	33.8		5.78704e-05	84
	0.000127315	48.6	39.1	34.8	86	33.9		6.94444e-05	86
	0.000138889	51.3	39.8	35	86.6	33.9		8.10185e-05	88
	0.000150463	53.7	40.4	35.2	87.4	34		9.25926e-05	91
	0.000162037	55.9	41.2	35.4	88.4	34.1		0.000104167	93
	0.000173611	57.5	41.9	35.6	89.6	34.2		0.000115741	95
	0.000185185	59.3	42.7	35.8	91.2	34.3		0.000127315	98
	0.000196759	60.8	43.3	36	92.4	34.4		0.000138889	101
	0.000208333	62.6	44.3	36.2	93.8	34.5		0.000150463	104
	0.000219907	63.9	45	36.4	94.9	34.6		0.000162037	109
	0.000231481	65.1	45.8	36.6	95.8	34.7		0.000173611	106
	0.000243056	66.4	46.6	36.8	96.7	34.7		0.000185185	105
	0.000266204	67.7	47.6	37	97.4	34.9		0.000196759	105
	0.000277778	68.7	48.5	37.2	97.9	34.9		0.000208333	106
	0.000289352	69.7	49.4	37.3	98.4	35		0.000219907	105
	0.000300926	70.8	50.5	37.5	99	35.1		0.000231481	114
	0.0003125	71.8	51.4	37.7	99.6	35.2		0.000243056	120
	0.000324074	72.7	52.4	37.9	99.9	35.3		0.00025463	123
	0.000335648	73.8	53.6	38.1	100.2	35.4		0.000266204	126
	0.000347222	74.7	54.7	38.3	100.4	35.5		0.000277778	128
	0.000358796	75.6	55.9	38.4	100.6	35.6		0.000289352	126
	0.00037037	76.4	57.1	38.7	100.9	35.7		0.000300926	128
	0.000381944	77.1	57.9	38.8	100.8	35.8		0.0003125	130
	0.000393519	77.7	59.1	39	100.6	35.9		0.000324074	132
	0.000405093	78.4	61.3	39.2	100.5	36		0.000335648	134
	0.000416667	79.1	64	39.3	100.6	36		0.000347222	137
	0.000439815	79.8	66.2	39.5	100.7	36.2		0.000358796	140
	0.000451389	80.3	67.9	39.6	100.8	36.2		0.00037037	141
	0.000462963	80.9	69.6	39.8	100.9	36.3		0.000381944	141
	0.000474537	81.4	71.2	39.9	101	36.4		0.000393519	141
	0.000486111	82.1	72.8	40.2	101.1	36.5		0.000405093	142
	0.000497685	82.9	74.1	40.4	101.1	36.6		0.000416667	143
	0.000509259	83.4	75.3	40.5	101.3	36.8		0.000428241	140
	0.000520833	84	76.2	40.7	101.4	36.8		0.000439815	139
	0.000532407	84.5	77.3	40.9	101.5	36.9		0.000451389	139
	0.000543981	84.9	78.3	41	101.7	37		0.000462963	138
	0.00056713	85.4	79.4	41.2	101.9	37.1		0.000474537	138
	0.000578704	85.9	80.4	41.4	102.1	37.2		0.000486111	138
	0.000590278	86.3	81.3	41.5	102.2	37.3		0.000497685	138
	0.000601852	86.9	82.3	41.7	102.5	37.4		0.000509259	137
	0.000613426	87.2	83	41.8	102.8	37.5		0.000520833	138
	0.000625	87.6	83.8	42	103.1	37.6		0.000532407	138
	0.000636574	88.1	84.7	42.2	103.6	37.7		0.000543981	139
	0.000648148	88.5	85.3	42.3	103.9	37.7		0.000555556	140
	0.000659722	88.8	86.1	42.4	104.3	37.8		0.00056713	139
	0.000671296	89.3	86.9	42.5	105	37.9		0.000578704	139
	0.00068287	89.7	87.7	42.7	105.7	38		0.000590278	138
	0.000694444	90	88.3	42.9	106.4	38.1		0.000601852	138
	0.000706019	90.3	88.8	43	107.2	38.2		0.000613426	137
	0.000717593	90.7	89.2	43.1	107.9	38.3		0.000625	136
	0.000740741	91.1	89.9	43.2	109	38.4		0.000636574	138
	0.000752315	91.4	90.5	43.4	109.8	38.5		0.000648148	139
	0.000763889	91.8	91.2	43.5	110.9	38.5		0.000659722	139
	0.000775463	92	91.7	43.6	111.8	38.6		0.000671296	139
	0.000787037	92.4	92.2	43.8	112.9	38.7		0.00068287	139
	0.000798611	92.6	92.6	43.9	113.8	38.8		0.000694444	139
	0.000810185	92.9	93.1	44	114.8	38.9		0.000706019	139
	0.000821759	93.1	93.7	44.1	115.7	38.9		0.000717593	138
	0.000833333	93.4	93.9	44.2	116.5	39		0.000729167	138
	0.000844907	93.6	94.4	44.4	117.4	39.1		0.000740741	137
	0.000856481	93.9	94.6	44.5	118.4	39.1		0.000752315	135
	0.000868056	94.1	95	44.6	119.2	39.2		0.000763889	128
	0.000891204	94.3	95.3	44.7	119.1	39.2		0.000775463	125
	0.000902778	94.7	95.9	44.9	119.3	39.4		0.000787037	123
	0.000925926	95	96.2	45	119.6	39.5		0.000798611	123
	0.0009375	95.2	96.5	45.1	119.9	39.6		0.000810185	122
	0.000949074	95.4	96.7	45.3	120.4	39.6		0.000821759	122
	0.000960648	95.5	97	45.3	121	39.7		0.000833333	123
	0.000972222	95.7	97.2	45.1	121.6	39.6		0.000844907	121
	0.000983796	95.8	97.4	44.9	122.1	39.6		0.000856481	121
	0.00099537	96	98.3	44.9	121.8	39.6		0.000868056	121
	0.00100694	96.2	100.3	45	119.9	39.7		0.00087963	120
	0.00101852	96.4	100.2	45	119.4	39.7		0.000891204	120
	0.00103009	96.6	99.9	45.1	119.3	39.8		0.000902778	120
	0.00104167	96.7	99.8	45.2	119.8	39.8		0.000914352	121
	0.00106481	96.9	99.7	45.2	120.7	39.9		0.000925926	120
	0.00108796	97.2	99.7	45.2	121.9	39.9		0.0009375	119
	0.00109954	97.3	99.7	45.2	122.4	39.9		0.000949074	120
	0.00111111	97.5	99.8	45.3	123	40		0.000960648	120
	0.00112269	97.6	99.8	45.4	123.4	40		0.000972222	120
	0.00113426	97.8	99.8	45.5	124	40.1		0.000983796	119
	0.00114583	97.9	99.9	45.6	124.4	40.1		0.00099537	120
	0.00115741	98.1	99.9	45.7	124.8	40.2		0.00100694	120
	0.00116898	98.3	99.9	45.8	125.1	40.2		0.00101852	120
	0.00118056	98.5	100	46	125.4	40.3		0.00103009	120
	0.00119213	98.6	100	46	125.7	40.3		0.00104167	120
	0.0012037	98.8	100	46	126	40.2		0.00105324	119
	0.00121528	98.9	100	46.1	126.2	40.3		0.00106481	119
	0.00122685	99.1	100.1	46.2	126.4	40.3		0.00107639	118
	0.00123843	99.3	100.1	46.3	126.5	40.3		0.00108796	118
	0.00125	99.4	100.1	46.5	126.6	40.4		0.00109954	118
	0.00126157	99.5	100.2	46.6	126.6	40.4		0.00111111	118
	0.00127315	99.6	100.2	46.7	126.8	40.4		0.00112269	117
	0.00128472	99.7	100.6	46.9	126.9	40.5		0.00113426	117
	0.0012963	99.8	100.8	47	127.4	40.5		0.00114583	117
	0.00131944	99.9	100.8	47.2	128.2	40.6		0.00115741	117
	0.00133102	99.9	100.9	47.3	128.8	40.7		0.00116898	117
	0.00134259	100	100.8	47.5	129.1	40.8		0.00118056	117
	0.00135417	100.1	100.9	47.7	129.5	40.8		0.00119213	117
	0.00136574	100.2	100.9	47.8	129.8	40.9		0.0012037	117
	0.00138889	100.3	100.9	48	130.2	41		0.00121528	117
	0.00140046	100.3	100.9	48.2	130.5	41		0.00122685	117
	0.00141204	100.4	100.9	48.3	130.8	41.1		0.00123843	117
	0.00142361	100.4	100.9	48.5	131.2	41.2		0.00125	117
	0.00143519	100.5	101	48.6	131.5	41.2		0.00126157	116
	0.00144676	100.6	101	48.7	131.8	41.3		0.00127315	116
	0.00145833	100.6	101	48.8	132.1	41.4		0.00128472	116
	0.00146991	100.7	101	49	132.4	41.4		0.0012963	117
	0.00148148	100.7	101	49.1	132.7	41.5		0.00130787	117
	0.00149306	100.8	101	49.3	133	41.6		0.00131944	117
	0.00150463	100.9	101	49.4	133.3	41.7		0.00133102	116
	0.0015162	100.9	101	49.7	133.5	41.8		0.00134259	117
	0.00152778	100.9	101	49.9	133.8	41.8		0.00135417	117
	0.00153935	100.9	101	50.1	134	41.9		0.00136574	117
	0.00155093	100.9	101.1	50.3	134.1	42		0.00137731	117
	0.0015625	100.9	101.1	50.5	134.3	42.1		0.00138889	117
	0.00157407	100.9	101.1	50.7	134.5	42.2		0.00140046	117
	0.00158565	100.9	101.1	50.9	134.7	42.2		0.00141204	117
	0.00159722	100.9	101.1	51.1	134.9	42.3		0.00142361	117
	0.0016088	100.9	101.1	51.2	135.1	42.4		0.00143519	116
	0.00162037	101	101.1	51.4	135.3	42.5		0.00144676	116
	0.00163194	101	101.1	51.6	135.4	42.6		0.00145833	116
	0.00164352	101	101.1	51.8	135.5	42.6		0.00146991	116
	0.00165509	100.9	100.9	52	133.7	42.7		0.00148148	116
	0.00166667	101	100.9	52.1	131.2	42.8		0.00149306	116
	0.00168981	101	100.8	52.4	129.4	42.9		0.00150463	116
	0.00170139	101.1	100.8	52.5	128.4	43		0.0015162	117
	0.00171296	101.2	100.8	52.6	127.6	43		0.00152778	117
	0.00172454	101.3	100.8	52.9	127	43.1		0.00153935	117
	0.00173611	101.4	100.8	53	126.6	43.2		0.00155093	117
	0.00174769	101.4	100.8	53.2	126.4	43.3		0.0015625	117
	0.00175926	101.5	100.9	53.3	126.1	43.3		0.00157407	117
	0.00177083	101.6	100.8	53.4	125.8	43.5		0.00158565	117
	0.00178241	101.7	100.9	53.6	125.7	43.5		0.00159722	117
	0.00179398	101.8	101	54.3	125.7	43.6		0.0016088	117
	0.00180556	101.7	101	54.8	125.7	43.7		0.00162037	117
	0.00181713	101.5	101	54.9	125.7	43.8		0.00163194	117
	0.0018287	101.5	101.1	55	125.7	43.9		0.00164352	117
	0.00184028	101.6	101.1	55.1	125.8	44		0.00165509	116
	0.00185185	101.6	101.1	55.3	125.7	44.1		0.00166667	116
	0.00186343	101.6	101.2	55.5	125.7	44.2		0.00167824	116
	0.001875	101.6	101.2	55.6	125.7	44.3		0.00168981	116
	0.00188657	101.6	101.2	55.7	125.6	44.4		0.00170139	116
	0.00189815	101.6	101.3	55.9	125.4	44.5		0.00171296	115
	0.00190972	101.7	101.3	56	125.4	44.6		0.00172454	115
	0.00193287	101.7	101.3	56.2	124.9	44.7		0.00173611	115
	0.00194444	101.7	101.4	56.4	124.4	44.9		0.00174769	115
	0.00195602	101.7	101.4	56.5	124.5	44.9		0.00175926	115
	0.00196759	101.8	101.5	56.6	124.6	45		0.00177083	114
	0.00197917	101.8	101.5	56.7	124.8	45.1		0.00178241	114
	0.00199074	101.8	101.5	56.8	124.8	45.2		0.00179398	114
	0.00200231	101.8	101.6	56.9	124.9	45.3		0.00180556	114
	0.00201389	101.8	101.6	57	124.9	45.4		0.00181713	114
	0.00202546	101.9	101.6	57.1	125	45.5		0.0018287	114
	0.00203704	101.9	101.6	57.2	124.3	45.6		0.00184028	113
	0.00204861	101.9	101.7	57.3	124.5	45.7		0.00185185	113
	0.00206019	101.9	101.7	57.4	124.7	45.8		0.00186343	113
	0.00207176	102	101.7	57.5	124.8	45.9		0.001875	113
	0.00208333	102	101.8	57.6	124.8	45.9		0.00188657	113
	0.00209491	102	101.8	57.7	124.9	46		0.00189815	113
	0.00210648	102	101.8	57.9	124.9	46.1		0.00190972	114
	0.00211806	102	101.8	57.9	124.7	46.2		0.0019213	113
	0.00212963	102.1	101.9	58.1	124.6	46.3		0.00193287	112
	0.0021412	102.1	101.9	58.2	124.2	46.4		0.00194444	112
	0.00215278	102.1	102	58.3	124.2	46.4		0.00195602	112
	0.00216435	102.1	102	58.4	124.1	46.5		0.00196759	112
	0.00217593	102.1	102	58.5	124	46.6		0.00197917	112
	0.0021875	102.1	102.1	58.7	124	46.7		0.00199074	112
	0.00219907	102.2	102.1	58.7	124.1	46.8		0.00200231	112
	0.00222222	102.2	102.2	58.8	124.3	46.9		0.00201389	112
	0.0022338	102.2	102.2	58.9	124.1	46.9		0.00202546	112
	0.00224537	102.2	102.3	59	123.8	47		0.00203704	111
	0.00225694	102.2	102.3	59.1	123.8	47.1		0.00204861	111
	0.00226852	102.2	102.3	59.1	124.1	47.2		0.00206019	111
	0.00228009	102.3	102.4	59.2	124.4	47.3		0.00207176	111
	0.00229167	102.3	102.4	59.3	124.6	47.4		0.00208333	111
	0.00230324	102.3	102.4	59.4	124.8	47.5		0.00209491	111
	0.00231481	102.4	102.5	59.4	124.9	47.6		0.00210648	110
	0.00232639	102.4	102.6	59.6	124.8	47.7		0.00211806	111
	0.00233796	102.4	102.6	59.7	124.6	47.8		0.00212963	110
	0.00234954	102.4	102.7	59.8	124.6	47.9		0.0021412	111
	0.00236111	102.5	102.7	59.9	124.7	47.9		0.00215278	111
	0.00237269	102.5	102.8	59.9	125	48		0.00216435	111
	0.00238426	102.5	102.8	60	125.2	48.1		0.00217593	111
	0.00239583	102.6	102.9	60.1	125.4	48.2		0.0021875	110
	0.00240741	102.6	102.9	60.2	125.5	48.3		0.00219907	110
	0.00241898	102.6	103	60.3	125.7	48.4		0.00221065	110
	0.00243056	102.7	103	60.3	125.7	48.4		0.00222222	110
	0.00244213	102.7	103.1	60.4	125.6	48.5		0.0022338	110
	0.0024537	102.7	103.1	60.5	125.7	48.6		0.00224537	110
	0.00246528	102.7	103.1	60.6	125.7	48.6		0.00225694	110
	0.00247685	102.8	103.2	60.6	125.8	48.7		0.00226852	110
	0.00248843	102.8	103.3	60.8	125.9	48.8		0.00228009	110
	0.00251157	102.8	103.3	60.9	125.9	48.9		0.00229167	109
	0.00252315	102.9	103.4	61	125.9	49		0.00230324	110
	0.00253472	102.9	103.4	61.1	125.9	49.1		0.00231481	110
	0.0025463	103	103.5	61.2	125.9	49.2		0.00232639	109
	0.00255787	103	103.6	61.2	125.9	49.2		0.00233796	109
	0.00256944	103	103.7	61.2	125.9	49.3		0.00234954	109
	0.00258102	103	103.8	61.3	125.8	49.4		0.00236111	109
	0.00259259	103	103.8	61.3	125.6	49.5		0.00237269	109
	0.00260417	103.1	103.9	61.4	125.5	49.6		0.00238426	109
	0.00261574	103.1	104	61.4	125.4	49.6		0.00239583	109
	0.00262731	103.1	104	61.4	125.6	49.7		0.00240741	109
	0.00263889	103.1	104.1	61.5	125.7	49.8		0.00241898	109
	0.00265046	103.2	104.2	61.6	125.8	49.9		0.00243056	109
	0.00266204	103.2	104.3	61.6	126	50		0.00244213	109
	0.00267361	103.2	104.3	61.7	126.1	50.1		0.0024537	109
	0.00268519	103.2	104.4	61.7	126.2	50.2		0.00246528	110
	0.00269676	103.3	104.5	61.8	126.2	50.2		0.00247685	110
	0.00270833	103.3	104.6	61.8	126.2	50.3		0.00248843	110
	0.00271991	103.3	104.7	61.9	126.3	51.1		0.0025	110
	0.00274306	103.4	104.8	61.9	126.4	51.7		0.00251157	110
	0.00275463	103.4	104.9	62	126.5	51.8		0.00252315	112
	0.0027662	103.4	105	62	126.6	51.8		0.00253472	110
	0.00277778	103.4	105.1	62.1	126.7	51.9		0.0025463	110
	0.00278935	103.2	105.1	62.2	126.6	52		0.00255787	110
	0.00280093	103	105.3	62.3	126.5	52.1		0.00256944	110
	0.0028125	102.9	105.4	62.4	126.5	52.2		0.00258102	110
	0.00282407	102.9	105.5	62.4	126.6	52.2		0.00259259	109
	0.00283565	102.9	105.6	62.5	126.8	52.3		0.00260417	110
	0.00284722	102.9	105.7	62.6	126.9	52.3		0.00261574	110
	0.0028588	102.9	105.8	62.7	126.8	52.4		0.00262731	109
	0.00287037	102.9	105.9	62.7	126.8	52.5		0.00263889	109
	0.00288194	102.8	106	62.8	126.8	52.5		0.00265046	109
	0.00289352	102.9	106.2	62.8	127.1	52.6		0.00266204	109
	0.00290509	102.9	106.3	62.9	127.1	52.6		0.00267361	109
	0.00291667	102.9	106.4	63	127.1	52.7		0.00268519	109
	0.00292824	102.9	106.5	63.1	127	52.8		0.00269676	109
	0.00293981	102.9	106.6	63.2	126.9	52.8		0.00270833	109
	0.00296296	102.9	106.7	63.3	127	52.9		0.00271991	109
	0.00297454	102.9	106.8	63.5	127	53		0.00273148	109
	0.00298611	103	107	63.7	127.1	53.1		0.00274306	109
	0.00299769	103	107.1	63.8	127.2	53.2		0.00275463	109
	0.00300926	103	107.3	63.9	127	53.3		0.0027662	109
	0.00302083	103	107.4	64	127	53.4		0.00277778	109
	0.00303241	103	107.5	64	127	53.4		0.00278935	109
	0.00304398	103.1	107.6	64.1	127.1	53.5		0.00280093	109
	0.00305556	103.1	107.8	64.2	127.1	53.6		0.0028125	109
	0.00306713	103.1	107.9	64.2	127.1	53.7		0.00282407	109
	0.0030787	103.1	108	64.3	127.1	53.7		0.00283565	108
	0.00309028	103.1	108	64.4	127	53.8		0.00284722	109
	0.00310185	103.1	108.1	64.5	126.9	53.9		0.0028588	109
	0.00311343	103.2	108.3	64.5	127.1	54		0.00287037	109
	0.003125	103.2	108.4	64.6	127.2	54		0.00288194	109
	0.00313657	103.2	108.6	64.6	127.4	54.1		0.00289352	108
	0.00314815	103.2	108.7	64.8	127.6	54.2		0.00290509	108
	0.00315972	103.2	108.9	64.8	127.8	54.2		0.00291667	108
	0.0031713	103.3	109	64.8	128.1	54.3		0.00292824	108
	0.00318287	103.2	109.1	64.9	128.2	54.4		0.00293981	108
	0.00319444	103.3	109.2	65	128.3	54.5		0.00295139	108
	0.00320602	103.3	109.2	65.1	128.3	54.6		0.00296296	108
	0.00321759	103.3	109.3	65.2	128.3	54.7		0.00297454	108
	0.00322917	103.3	109.4	65.2	128.2	54.7		0.00298611	108
	0.00325231	103.3	109.5	65.3	128.1	54.8		0.00299769	108
	0.00327546	103.4	109.8	65.4	128.1	55		0.00300926	108
	0.00328704	103.4	109.9	65.5	128.2	55.1		0.00302083	108
	0.00329861	103.4	110	65.6	128.2	55.2		0.00303241	108
	0.00331019	103.4	110.2	65.7	128.3	55.2		0.00304398	108
	0.00332176	103.4	110.3	65.8	128.4	55.3		0.00305556	108
	0.00333333	103.4	110.4	65.9	128.5	55.4		0.00306713	108
	0.00334491	103.5	110.6	65.8	128.5	55.5		0.0030787	108
	0.00335648	103.5	110.7	65.9	128.6	55.6		0.00309028	108
	0.00336806	103.5	110.9	66	128.7	55.6		0.00310185	108
	0.00337963	103.5	111	66	128.7	55.7		0.00311343	108
	0.0033912	103.6	111.2	66.2	128.8	55.8		0.003125	108
	0.00340278	103.6	111.3	66.3	128.9	55.9		0.00313657	108
	0.00341435	103.6	111.4	66.4	128.9	56		0.00314815	108
	0.00342593	103.7	111.5	66.4	128.7	56.1		0.00315972	108
	0.0034375	103.7	111.7	66.4	128.7	56.1		0.0031713	108
	0.00344907	103.7	111.8	66.5	128.7	56.2		0.00318287	108
	0.00346065	103.7	111.9	66.5	128.6	56.3		0.00319444	108
	0.00347222	103.8	112.1	66.6	128.6	56.4		0.00320602	108
	0.0034838	103.8	112.3	66.6	128.7	56.5		0.00321759	108
	0.00349537	103.8	112.4	66.6	128.7	56.5		0.00322917	108
	0.00350694	103.8	112.5	66.7	128.7	56.6		0.00324074	108
	0.00351852	103.8	112.7	66.8	128.7	56.7		0.00325231	108
	0.00354167	103.8	112.9	66.8	128.9	56.7		0.00326389	108
	0.00355324	103.9	113	66.9	129	56.8		0.00327546	108
	0.00356481	103.9	113.2	67	129.3	56.9		0.00328704	108
	0.00357639	103.9	113.3	67	129.5	57		0.00329861	108
	0.00358796	103.9	113.5	67.1	129.5	57.1		0.00331019	108
	0.00359954	104	113.6	67.2	129.4	57.1		0.00332176	108
	0.00361111	104	113.7	67.2	129.4	57.2		0.00333333	108
	0.00362269	103.9	113.9	67.3	129.4	57.3		0.00334491	108
	0.00363426	103.8	114	67.4	129.4	57.3		0.00335648	108
	0.00364583	103.8	114.2	67.4	129.5	57.4		0.00336806	108
	0.00365741	103.8	114.3	67.5	129.7	57.5		0.00337963	108
	0.00366898	103.8	114.5	67.6	129.7	57.5		0.0033912	108
	0.00368056	103.8	114.6	67.7	129.8	57.6		0.00340278	108
	0.00369213	103.8	114.8	67.7	129.4	57.7		0.00341435	108
	0.0037037	103.8	114.9	67.9	129.2	57.8		0.00342593	108
	0.00371528	103.8	115.1	67.9	129.3	57.8		0.0034375	108
	0.00372685	103.8	114.8	68.1	129.7	57.9		0.00344907	108
	0.00373843	103.8	114.4	68.1	129.5	57.9		0.00346065	108
	0.00375	103.8	114.1	68.1	129.7	58		0.00347222	108
	0.00377315	103.9	113.8	68.2	129.9	58.1		0.0034838	108
	0.00378472	103.9	113.6	68.3	129.3	58.3		0.00349537	108
	0.0037963	104	113.6	68.3	129.3	58.3		0.00350694	108
	0.00380787	104	113.6	68.4	129.5	58.4		0.00351852	108
	0.00383102	104	113.6	68.5	129.8	58.5		0.00353009	107
	0.00384259	104	113.6	68.5	129.9	58.5		0.00354167	107
	0.00385417	104	113.7	68.5	129.8	58.6		0.00355324	106
	0.00386574	104	113.7	68.5	129.3	58.7		0.00356481	108
	0.00387731	104	113.8	68.5	129	58.8		0.00357639	108
	0.00388889	104	113.9	68.6	129.2	58.8		0.00358796	107
	0.00390046	104.1	114	68.6	129.4	58.9		0.00359954	107
	0.00391204	104.1	114.1	68.7	129.4	59		0.00361111	107
	0.00392361	104.1	114.2	68.8	129.3	59		0.00362269	108
	0.00393519	104.1	114.3	68.9	129	59.1		0.00363426	107
	0.00394676	104.2	114.4	69.1	129	59.2		0.00364583	107
	0.00395833	104.2	114.4	69.2	129.3	59.2		0.00365741	107
	0.00396991	104.2	114.6	69.3	129.3	59.3		0.00366898	107
	0.00398148	104.3	114.8	69.3	129.5	59.4		0.00368056	107
	0.00399306	104.3	114.9	69.4	129.6	59.4		0.00369213	107
	0.0040162	104.3	115.1	69.5	129.4	59.5		0.0037037	107
	0.00402778	104.3	115.2	69.5	129	59.6		0.00371528	107
	0.00403935	104.4	115.3	69.5	128.8	59.6		0.00372685	107
	0.00405093	104.4	115.5	69.5	128.9	59.7		0.00373843	107
	0.0040625	104.4	115.6	69.6	128.9	59.8		0.00375	107
	0.00407407	104.4	115.8	69.7	128.9	59.8		0.00376157	107
	0.00408565	104.4	115.9	69.8	129.1	59.9		0.00377315	107
	0.00409722	104.5	116	69.9	129.1	60		0.00378472	107
	0.0041088	104.5	116.2	70	129.2	60		0.0037963	107
	0.00412037	104.3	116.3	70.2	129.4	60.1		0.00380787	107
	0.00413194	104.3	116.5	70.3	129.1	60.2		0.00381944	107
	0.00415509	104.2	116.6	70.4	128.8	60.3		0.00383102	107
	0.00416667	104.3	116.8	70.4	128.6	60.3		0.00384259	107
	0.00417824	104.3	116.9	70.5	128.5	60.4		0.00385417	107
	0.00418981	104.3	117.1	70.6	128.6	60.5		0.00386574	107
	0.00420139	104.3	117.2	70.7	128.7	60.5		0.00387731	107
	0.00421296	104.3	117.4	70.8	128.9	60.6		0.00388889	107
	0.00422454	104.3	117.5	70.9	129	60.7		0.00390046	107
	0.00423611	104.3	117.6	70.9	128.9	60.7		0.00391204	107
	0.00424769	104.3	117.8	71.1	129	60.8		0.00392361	107
	0.00425926	104.3	117.9	71.1	128.6	60.9		0.00393519	107
	0.00427083	104.3	118.1	71.2	128.4	60.9		0.00394676	107
	0.00428241	104.3	118.2	71.2	128.3	61		0.00395833	107
	0.00429398	104.3	118.4	71.3	128.3	61.1		0.00396991	107
	0.00430556	104.4	118.5	71.4	128.4	61.1		0.00398148	107
	0.00431713	104.3	118.7	71.5	128.5	61.2		0.00399306	107
	0.0043287	104.4	118.8	71.5	128.5	61.3		0.00400463	107
	0.00434028	104.4	118.9	71.6	128.6	61.3		0.0040162	107
	0.00435185	104.4	119.1	71.7	128.3	61.4		0.00402778	107
	0.00436343	104.5	119.2	71.8	128.2	61.4		0.00403935	106
	0.004375	104.5	119.4	71.8	128.3	61.5		0.00405093	106
	0.00438657	104.5	119.5	72	128.4	61.6		0.0040625	106
	0.00439815	104.5	119.6	72	128.4	61.6		0.00407407	106
	0.00440972	104.5	119.8	72	128.5	61.7		0.00408565	106
	0.0044213	104.6	119.9	71.9	128.6	61.8		0.00409722	106
	0.00443287	104.6	120	71.9	128.7	61.8		0.0041088	106
	0.00444444	104.6	120.1	72	128.6	61.9		0.00412037	107
	0.00445602	104.6	120.3	72.1	128.4	61.9		0.00413194	106
	0.00446759	104.6	120.4	72.1	128.2	62		0.00414352	106
	0.00449074	104.7	120.5	71.9	128.2	62.1		0.00415509	106
	0.00450231	104.7	120.7	71.9	128.2	62.1		0.00416667	107
	0.00451389	104.7	120.9	71.8	128.2	62.2		0.00417824	106
	0.00452546	104.8	121	71.8	128.2	62.2		0.00418981	106
	0.00453704	104.8	121.1	71.8	128.2	62.3		0.00420139	106
	0.00454861	104.8	121.1	71.8	128.2	62.3		0.00421296	106
	0.00456019	104.9	121.2	71.8	128.1	62.4		0.00422454	106
	0.00457176	104.9	121.3	71.9	128.1	62.4		0.00423611	106
	0.00458333	104.9	121.3	71.8	128.1	62.5		0.00424769	106
	0.00459491	105	121.4	71.8	128.2	62.5		0.00425926	106
	0.00460648	105	121.5	71.9	128.3	62.6		0.00427083	106
	0.00461806	105	121.6	72.2	128.1	62.6		0.00428241	106
	0.00462963	105.1	121.7	72.4	128	62.7		0.00429398	106
	0.0046412	105.1	121.8	72.7	128.1	62.7		0.00430556	106
	0.00465278	105.1	121.9	72.7	128	62.7		0.00431713	106
	0.00466435	105.1	122	72.5	128.1	62.8		0.0043287	106
	0.0046875	105.2	122.1	72.4	128.3	62.9		0.00434028	106
	0.00469907	105.2	122.2	72.4	128.2	62.9		0.00435185	106
	0.00471065	105.2	122.3	72.4	128.1	63		0.00436343	106
	0.00472222	105.2	122.5	72.4	128.1	63		0.004375	106
	0.0047338	105.3	122.6	72.3	128.2	63.1		0.00438657	106
	0.00474537	105.3	122.7	72.3	128.3	63.1		0.00439815	106
	0.00475694	105.3	122.8	72.3	128.2	63.2		0.00440972	106
	0.00476852	105.3	122.9	72.4	128.3	63.2		0.0044213	106
	0.00478009	105.3	123.1	72.4	128.4	63.3		0.00443287	106
	0.00479167	105.4	123.2	72.4	128.4	63.3		0.00444444	105
	0.00480324	105.4	123.3	72.4	128.3	63.3		0.00445602	106
	0.00481481	105.5	123.4	72.4	128.1	63.4		0.00446759	106
	0.00482639	105.5	123.5	72.4	128	63.5		0.00447917	105
	0.00483796	105.5	123.6	72.4	128	63.5		0.00449074	105
	0.00484954	105.6	123.8	72.4	128.1	63.5		0.00450231	105
	0.00486111	105.6	123.9	72.4	128.1	63.6		0.00451389	105
	0.00487269	105.6	124	72.5	128.3	63.6		0.00452546	106
	0.00488426	105.7	124.2	72.7	128.4	63.7		0.00453704	105
	0.00489583	105.7	124.3	72.7	128.4	63.7		0.00454861	105
	0.00490741	105.7	124.4	72.8	128.3	63.8		0.00456019	105
	0.00491898	105.8	124.5	72.8	128.3	63.8		0.00457176	105
	0.00493056	105.8	124.6	72.9	128.4	63.9		0.00458333	105
	0.00494213	105.9	124.6	72.9	128.5	63.9		0.00459491	105
	0.00496528	105.9	124.7	72.9	128.5	63.9		0.00460648	106
	0.00497685	106	124.7	72.9	128.5	64		0.00461806	106
	0.00498843	106	124.8	72.9	128.6	64		0.00462963	105
	0.005	106.1	124.9	72.9	128.7	64.1		0.0046412	105
	0.00501157	106.1	125.1	72.9	128.6	64.1		0.00465278	105
	0.00502315	106.1	125.2	72.9	128.5	64.2		0.00466435	105
	0.00503472	106.2	125.2	72.9	128.5	64.2		0.00467593	105
	0.0050463	106.2	125.3	73	128.6	64.3		0.0046875	105
	0.00505787	106.3	125.5	72.9	128.7	64.3		0.00469907	105
	0.00506944	106.4	125.6	73	128.8	64.4		0.00471065	105
	0.00508102	106.4	125.7	72.9	128.9	64.4		0.00472222	105
	0.00509259	106.5	125.9	72.9	128.9	64.5		0.0047338	105
	0.00510417	106.5	126	73	128.9	64.5		0.00474537	105
	0.00511574	106.5	126.1	73.1	128.9	64.6		0.00475694	105
	0.00512731	106.6	126.2	73.1	128.8	64.6		0.00476852	105
	0.00513889	106.6	126.3	73.1	128.7	64.6		0.00478009	105
	0.00516204	106.7	126.4	73.1	128.7	64.7		0.00479167	105
	0.00517361	106.7	126.4	73.2	126.1	64.8		0.00480324	105
	0.00518519	106.8	125.2	73.3	123.8	64.8		0.00481481	105
	0.00519676	106.9	123.9	73.3	124.7	64.8		0.00482639	105
	0.00520833	106.9	122.5	73.3	125.8	64.9		0.00483796	105
	0.00521991	106.9	121.7	73.4	126.5	65		0.00484954	105
	0.00523148	106.9	121.1	73.4	127.2	65		0.00486111	105
	0.00524306	107	120.6	73.5	127.7	65		0.00487269	105
	0.00525463	107	120.4	73.5	128.3	65.1		0.00488426	105
	0.0052662	107.1	120.2	73.6	128.6	65.1		0.00489583	104
	0.00527778	107.1	120.1	73.7	128.9	65.2		0.00490741	105
	0.00528935	107.2	120.1	73.7	129.1	65.2		0.00491898	105
	0.00530093	107.2	120.1	73.8	129.2	65.3		0.00493056	105
	0.0053125	107.3	120.1	73.8	129.4	65.3		0.00494213	105
	0.00532407	107.4	120.1	73.8	129.7	65.3		0.0049537	105
	0.00533565	107.4	120.1	73.9	129.9	65.4		0.00496528	105
	0.0053588	107.5	120.1	74	130.2	65.5		0.00497685	105
	0.00538194	107.6	120.2	74.1	130.5	65.5		0.00498843	105
	0.00539352	107.6	120.2	74.2	130.8	65.6		0.005	105
	0.00540509	107.7	120.2	74.3	131.1	65.6		0.00501157	105
	0.00541667	107.8	120.3	74.5	131.4	65.7		0.00502315	105
	0.00542824	107.8	120.3	74.5	131.6	65.7		0.00503472	105
	0.00543981	107.9	120.4	74.5	131.7	65.8		0.0050463	105
	0.00545139	108	120.5	74.4	131.8	65.9		0.00505787	105
	0.00546296	108	120.5	74.5	131.6	65.9		0.00506944	105
	0.00547454	108.1	120.6	74.5	131.5	66		0.00508102	105
	0.00548611	108.2	120.7	74.5	131.4	66		0.00509259	105
	0.00549769	108.3	120.8	74.5	131.4	66.1		0.00510417	105
	0.00550926	108.3	120.9	74.5	131.7	66.1		0.00511574	105
	0.00552083	108.4	121	74.5	131.9	66.1		0.00512731	105
	0.00553241	108.5	121.1	74.5	132.1	66.2		0.00513889	105
	0.00554398	108.5	121.2	74.6	132.4	66.2		0.00515046	105
	0.00555556	108.6	121.3	74.6	132.5	66.3		0.00516204	105
	0.00556713	108.7	121.4	74.6	132.2	66.4		0.00517361	105
	0.0055787	108.7	121.5	74.7	132.1	66.4		0.00518519	105
	0.00559028	108.8	121.6	74.7	132.1	66.5		0.00519676	105
	0.00560185	108.9	121.7	74.8	132.2	66.5		0.00520833	105
	0.00561343	108.9	121.8	75	132.3	66.6		0.00521991	106
	0.005625	109	121.8	75.1	132.5	66.6		0.00523148	105
	0.00563657	109.1	121.9	75.1	132.6	66.7		0.00524306	105
	0.00564815	109.1	122	75.2	132.7	66.7		0.00525463	105
	0.00565972	109.2	122.1	75.2	132.6	66.8		0.0052662	105
	0.0056713	109.3	122.2	75.3	132.4	66.8		0.00527778	105
	0.00568287	109.3	122.2	75.3	132.2	66.9		0.00528935	105
	0.00570602	109.4	122.3	75.3	132.1	66.9		0.00530093	104
	0.00572917	109.5	122.5	75.3	131.2	67		0.0053125	105
	0.00574074	109.5	122.5	75.5	130.9	67.1		0.00532407	105
	0.00575231	109.6	122.6	75.5	131	67.1		0.00533565	104
	0.00576389	109.7	122.7	75.6	131.1	67.1		0.00534722	104
	0.00577546	109.7	122.8	75.6	131.3	67.2		0.0053588	104
	0.00578704	109.8	122.9	75.6	131.4	67.3		0.00537037	104
	0.00579861	109.9	123	75.6	131.4	67.3		0.00538194	104
	0.00581019	110	123	75.7	131.4	67.4		0.00539352	104
	0.00582176	110	123.1	75.8	131.6	67.4		0.00540509	104
	0.00583333	110.1	123.2	75.8	131.8	67.4		0.00541667	104
	0.00584491	110.1	123.3	75.9	131.7	67.5		0.00542824	104
	0.00585648	110.2	123.4	75.9	131.7	67.5		0.00543981	104
	0.00586806	110.2	123.5	75.8	131.8	67.5		0.00545139	104
	0.00587963	110.3	123.6	75.8	131.9	67.6		0.00546296	104
	0.0058912	110.4	123.7	75.8	131.9	67.6		0.00547454	104
	0.00590278	110.4	123.7	75.9	132.1	67.7		0.00548611	104
	0.00591435	110.5	123.9	75.8	132.3	67.7		0.00549769	104
	0.00592593	110.5	123.9	75.9	132.4	67.8		0.00550926	104
	0.0059375	110.6	124	76	132.2	67.8		0.00552083	105
	0.00594907	110.7	124.1	76.1	132.3	67.9		0.00553241	104
	0.00596065	110.7	124.2	76.1	132	67.9		0.00554398	104
	0.0059838	110.8	124.4	76.2	131.4	68		0.00555556	104
	0.00600694	110.9	124.5	76.2	132	68.1		0.00556713	104
	0.00601852	111	124.6	76.4	132.2	68.1		0.0055787	105
	0.00603009	111	124.7	76.5	132.2	68.1		0.00559028	105
	0.00604167	111.1	124.8	76.6	132.2	68.1		0.00560185	105
	0.00605324	111.2	124.9	76.7	132.3	68.1		0.00561343	105
	0.00606481	111.2	125	77	132.1	68.2		0.005625	105
	0.00607639	111.3	125.1	77.2	132.2	68.2		0.00563657	105
	0.00608796	111.4	125.2	77.5	132.5	68.3		0.00564815	105
	0.00609954	111.4	125.3	77.7	132.3	68.3		0.00565972	105
	0.00611111	111.5	125.2	78	131.6	68.4		0.0056713	105
	0.00612269	111.6	125.1	78.2	131.5	68.5		0.00568287	105
	0.00613426	111.6	125.2	78.3	131.4	68.5		0.00569444	104
	0.00614583	111.7	125.2	78.5	131.4	68.6		0.00570602	104
	0.00615741	111.8	125.2	78.6	131.5	68.7		0.00571759	105
	0.00616898	111.8	125.2	78.8	131.3	68.7		0.00572917	104
	0.00618056	111.9	125.3	79	131.5	68.8		0.00574074	104
	0.00619213	111.9	125.3	79.1	131.7	68.9		0.00575231	104
	0.0062037	112	125.4	79.3	132	68.9		0.00576389	105
	0.00622685	112	125.4	79.5	132.2	69		0.00577546	105
	0.00623843	112.1	125.5	79.6	132.4	69		0.00578704	105
	0.00625	112.2	125.6	79.7	132.2	69.1		0.00579861	105
	0.00626157	112.2	125.6	79.9	131.9	69.1		0.00581019	105
	0.00627315	112.3	125.7	80	131.8	69.2		0.00582176	105
	0.00628472	112.3	125.8	80	132	69.2		0.00583333	105
	0.0062963	112.4	125.8	80.2	132.1	69.3		0.00584491	104
	0.00630787	112.5	125.8	80.2	132.1	69.4		0.00585648	104
	0.00631944	112.5	125.8	80.3	132.2	69.5		0.00586806	105
	0.00633102	112.6	125.9	80.4	132.4	69.5		0.00587963	104
	0.00634259	112.6	125.9	80.5	132.6	69.6		0.0058912	104
	0.00635417	112.7	126	80.6	132.6	69.7		0.00590278	105
	0.00636574	112.8	126	80.6	132.6	69.8		0.00591435	105
	0.00637731	112.8	126	80.7	132.8	69.9		0.00592593	105
	0.00638889	112.9	126.1	80.8	133	69.9		0.0059375	104
	0.00640046	112.9	126.1	80.9	133.1	70		0.00594907	104
	0.00641204	113	126.2	80.9	132.9	70.1		0.00596065	104
	0.00642361	113.1	126.2	81	132.8	70.2		0.00597222	105
	0.00643519	113.1	126.3	81.1	132.9	70.3		0.0059838	105
	0.00644676	113.1	126.4	81.2	133.1	70.4		0.00599537	105
	0.00646991	113.2	126.4	81.3	133.3	70.3		0.00600694	104
	0.00648148	113.2	126.4	81.4	133.4	70.4		0.00601852	105
	0.00649306	113.3	126.5	81.4	133.5	70.4		0.00603009	105
	0.00650463	113.3	126.6	81.5	133.3	70.5		0.00604167	105
	0.0065162	113.4	126.6	81.6	133.4	70.6		0.00605324	105
	0.00652778	113.5	126.7	81.6	133.7	70.7		0.00606481	105
	0.00653935	113.5	126.8	81.7	133.7	70.8		0.00607639	105
	0.00655093	113.6	126.7	81.7	133.8	70.8		0.00608796	105
	0.0065625	113.6	126.5	81.8	133.9	70.9		0.00609954	105
	0.00657407	113.7	126.4	81.9	133.8	71		0.00611111	105
	0.00658565	113.7	126.4	81.8	133.6	71.1		0.00612269	105
	0.00659722	113.8	126.3	81.8	133.3	71.1		0.00613426	105
	0.0066088	113.9	126.4	81.8	132.4	71.2		0.00614583	105
	0.00662037	113.9	126.4	81.7	132.5	71.3		0.00615741	105
	0.00664352	114	126.4	81.7	132.7	71.4		0.00616898	105
	0.00665509	114	126.5	81.8	133	71.4		0.00618056	105
	0.00666667	114.1	126.5	81.8	133.2	71.5		0.00619213	105
	0.00667824	114.2	126.6	81.8	133.4	71.5		0.0062037	105
	0.00668981	114.2	126.6	81.8	133.5	71.6		0.00621528	105
	0.00670139	114.3	126.7	81.9	133.5	71.6		0.00622685	105
	0.00671296	114.3	126.8	81.9	133.4	71.6		0.00623843	105
	0.00672454	114.4	126.8	81.9	133.5	71.6		0.00625	105
	0.00673611	114.4	126.9	81.9	133.2	71.7		0.00626157	105
	0.00674769	114.5	126.9	82	133.3	71.7		0.00627315	105
	0.00675926	114.5	126.9	82.1	133.2	71.8		0.00628472	105
	0.00677083	114.6	127	82.1	132.6	71.8		0.0062963	105
	0.00678241	114.7	127	82.1	132.7	71.9		0.00630787	105
	0.00679398	114.7	127	82.1	132.9	71.9		0.00631944	105
	0.00680556	114.7	127.1	82.2	132.9	72		0.00633102	105
	0.00681713	114.8	127.1	82.2	133.3	72		0.00634259	105
	0.0068287	114.9	127.2	82.3	133.7	72.1		0.00635417	105
	0.00684028	114.9	127.2	82.3	134.1	72.2		0.00636574	105
	0.00685185	115	127.3	82.4	133.8	72.2		0.00637731	105
	0.00686343	115	127.3	82.4	133.1	72.3		0.00638889	105
	0.00688657	115.1	127.4	82.4	133	72.4		0.00640046	105
	0.00689815	115.2	127.5	82.5	133.1	72.4		0.00641204	105
	0.00690972	115.3	127.6	82.6	133.3	72.4		0.00642361	105
	0.0069213	114.8	126.7	82.2	131.9	72		0.00643519	105
	0.00693287	114.2	124.9	81.7	129	71.8		0.00644676	105
	0.00694444	113.5	122.9	81.4	126.4	71.7		0.00645833	105
	0.00695602	112.8	120.7	80.9	123.8	71.6		0.00646991	105
	0.00696759	112.3	119	80.6	121.9	71.5		0.00648148	105
	0.00697917	111.7	117.3	80.1	120.4	71.4		0.00649306	105
	0.00699074	111.1	115.8	79.6	118.6	71.4		0.00650463	105
	0.00700231	110.6	114.5	79.2	117.4	71.3		0.0065162	105
	0.00701389	110.1	113.6	78.7	116.6	71.2		0.00652778	105
	0.00702546	109.7	112.7	78.3	115.9	71.2		0.00653935	105
	0.00703704	109.2	111.8	77.8	115.2	71.1		0.00655093	105
	0.00704861	108.8	111.1	77.4	114.5	71		0.0065625	105
	0.00706019	108.3	110.5	77	113.8	71		0.00657407	105
	0.00707176	108	109.8	76.6	113.4	70.9		0.00658565	105
	0.00708333	107.6	109.4	76.3	113.1	70.8		0.00659722	105
	0.00709491	107.3	108.9	76	112.9	70.7		0.0066088	105
	0.00710648	107	108.5	75.7	112.6	70.6		0.00662037	105
	0.00712963	106.6	108.1	75.4	112.4	70.5		0.00663194	105
	0.0071412	106.4	107.7	75.1	112.2	70.4		0.00664352	105
	0.00715278	106.1	107.4	74.8	112	70.3		0.00665509	105
	0.00716435	105.9	107.1	74.6	111.7	70.3		0.00666667	105
	0.00717593	105.6	106.9	74.4	111.5	70.1		0.00667824	105
	0.0071875	105.4	106.6	74.1	111.3	70		0.00668981	105
	0.00719907	105.2	106.3	73.9	111.1	70		0.00670139	105
	0.00721065	105	106.1	73.7	110.9	69.8		0.00671296	105
	0.00722222	104.7	105.8	73.4	110.7	69.7		0.00672454	105
	0.0072338	104.6	105.6	73.2	110.6	69.6		0.00673611	105
	0.00724537	104.4	105.4	73	110.4	69.5		0.00674769	104
	0.00725694	104.2	105.2	72.8	110.2	69.4		0.00675926	104
	0.00726852	104	105	72.5	110	69.3		0.00677083	105
	0.00728009	103.9	104.8	72.4	109.9	69.2		0.00678241	105
	0.00729167	103.7	104.6	72.2	109.7	69.1		0.00679398	105
	0.00730324	103.5	104.4	72	109.5	69		0.00680556	104
	0.00731481	103.3	104.2	71.8	109.4	68.9		0.00681713	104
	0.00732639	103.1	104	71.6	109.2	68.8		0.0068287	105
	0.00733796	102.9	103.8	71.5	109.1	68.7		0.00684028	104
	0.00734954	102.8	103.5	71.3	108.9	68.6		0.00685185	104
	0.00736111	102.6	103.4	71.1	108.7	68.5		0.00686343	104
	0.00737269	102.4	103.1	71	108.6	68.5		0.006875	105
	0.00738426	102.2	102.9	70.8	108.4	68.4		0.00688657	105
	0.00739583	102	102.7	70.7	108.2	68.3		0.00689815	104
	0.00741898	101.8	102.5	70.5	108	68.2		0.00690972	105
	0.00743056	101.7	102.3	70.4	107.9	68.1		0.0069213	104
	0.00744213	101.5	102.1	70.2	107.7	68		0.00693287	105
	0.0074537	101.3	101.9	70.1	107.5	68		0.00694444	105
	0.00746528	101.1	101.7	69.9	107.3	67.9		0.00695602	102
	0.00747685	100.9	101.5	69.8	107.1	67.8		0.00696759	89
	0.00748843	100.7	101.3	69.6	106.9	67.7		0.00697917	91
	0.0075	100.5	101.1	69.5	106.7	67.6		0.00699074	95
	0.00751157	100.4	100.9	69.4	106.5	67.5		0.00700231	98
	0.00752315	100.2	100.7	69.2	106.3	67.4		0.00701389	100
	0.00753472	100	100.5	69.1	106.1	67.4		0.00702546	101
	0.0075463	99.8	100.4	68.9	105.9	67.3		0.00703704	102
	0.00755787	99.6	100.2	68.8	105.7	67.2		0.00704861	103
	0.00756944	99.5	100	68.7	105.5	67.1		0.00706019	104
	0.00758102	99.2	99.9	68.6	105.2	67.1		0.00707176	104
	0.00760417	99.1	99.7	68.4	105	67		0.00708333	104
	0.00761574	98.7	99.4	68.2	104.7	66.8		0.00709491	105
	0.00762731	98.6	99.2	68.1	104.5	66.7		0.00710648	105
	0.00763889	98.4	99	68	104.3	66.7		0.00711806	105
	0.00765046	98.2	98.9	67.9	104.2	66.6		0.00712963	105
	0.00767361	98	98.7	67.8	104	66.5		0.0071412	105
	0.00768519	97.9	98.6	67.7	103.8	66.4		0.00715278	105
	0.00769676	97.7	98.4	67.6	103.6	66.4		0.00716435	105
	0.00770833	97.6	98.3	67.5	103.5	66.3		0.00717593	105
	0.00771991	97.4	98.1	67.4	103.3	66.2		0.0071875	105
	0.00773148	97.3	97.9	67.3	103.1	66.2		0.00719907	104
	0.00774306	97.1	97.8	67.2	103	66.1		0.00721065	104
	0.00775463	96.9	97.6	67.1	102.8	66		0.00722222	104
	0.0077662	96.8	97.5	67	102.7	65.9		0.0072338	104
	0.00777778	96.6	97.3	66.9	102.5	65.9		0.00724537	104
	0.00778935	96.5	97.2	66.8	102.4	65.8		0.00725694	104
	0.00780093	96.3	97.1	66.7	102.2	65.7		0.00726852	103
	0.0078125	96.2	96.9	66.6	102.1	65.7		0.00728009	103
	0.00782407	96	96.8	66.6	101.9	65.6		0.00729167	103
	0.00783565	95.9	96.6	66.5	101.8	65.5		0.00730324	103
	0.00784722	95.7	96.5	66.4	101.6	65.5		0.00731481	103
	0.0078588	95.6	96.3	66.3	101.5	65.4		0.00732639	103
	0.00787037	95.4	96.2	66.2	101.3	65.3		0.00733796	102
	0.00788194	95.2	96.1	66.1	101.2	65.3		0.00734954	102
	0.00789352	95.1	95.9	66	101	65.2		0.00736111	102
	0.00790509	94.9	95.8	65.9	100.9	65.2		0.00737269	102
	0.00791667	94.8	95.6	65.9	100.7	65.1		0.00738426	102
	0.00792824	94.6	95.5	65.8	100.6	65		0.00739583	102
	0.00795139	94.5	95.3	65.7	100.4	64.9		0.00740741	101
	0.00796296	94.3	95.2	65.6	100.3	64.9		0.00741898	101
	0.00797454	94.2	95.1	65.5	100.2	64.8		0.00743056	101
	0.00798611	94.1	95	65.5	100	64.8		0.00744213	101
	0.00799769	93.9	94.8	65.4	99.9	64.7		0.0074537	100
	0.00800926	93.8	94.7	65.3	99.7	64.7		0.00746528	100
	0.00802083	93.6	94.5	65.2	99.6	64.6		0.00747685	100
	0.00803241	93.5	94.4	65.2	99.5	64.6		0.00748843	100
	0.00804398	93.3	94.3	65.1	99.3	64.5		0.0075	100
	0.00805556	93.2	94.2	65	99.2	64.4		0.00751157	100
	0.00806713	93.1	94	64.9	99.1	64.4		0.00752315	99
	0.0080787	93	93.9	64.9	98.9	64.3		0.00753472	99
	0.00809028	92.8	93.8	64.8	98.8	64.3		0.0075463	99
	0.00810185	92.7	93.7	64.8	98.6	64.2		0.00755787	99
	0.00811343	92.6	93.6	64.7	98.5	64.2		0.00756944	99
	0.008125	92.4	93.4	64.6	98.4	64.1		0.00758102	98
	0.00813657	92.3	93.3	64.5	98.2	64.1		0.00759259	98
	0.00814815	92.2	93.2	64.5	98.1	64		0.00760417	98
	0.00815972	92	93.1	64.4	98	63.9		0.00761574	98
	0.0081713	91.9	93	64.4	97.8	63.9		0.00762731	98
	0.00818287	91.8	92.8	64.3	97.7	63.8		0.00763889	97
	0.00819444	91.7	92.7	64.2	97.6	63.8
	0.00820602	91.5	92.6	64.1	97.5	63.7
	0.00821759	91.4	92.5	64.1	97.3	63.7
	0.00822917	91.3	92.4	64	97.2	63.7
	0.00824074	91.2	92.3	64	97.1	63.4
	0.00826389	91	92.1	63.9	97	63.1
	0.00827546	90.9	92	63.8	96.8	63
	0.00828704	90.8	91.9	63.8	96.7	62.9
	0.00829861	90.6	91.7	63.2	96.5	62.8
	0.00831019	90.5	91.6	63.1	96.4	62.6
	0.00832176	90.4	91.5	63	96.2	62.5
	0.00833333	90.2	91.4	62.8	96.1	62.5
	0.00834491	90.1	91.3	62.6	95.6	62.4
	0.00835648	90.1	91.2	62.4	95.2	62.3
	0.00836806	89.9	91	62.2	94.9	62.3
	0.00837963	89.8	90.9	62.1	94.9	62.2
	0.0083912	89.7	90.8	62	94.8	62.2
	0.00840278	89.6	90.7	61.9	94.8	62.2
	0.00841435	89.5	90.5	61.8	94.8	62.2
	0.0084375	89.3	90.4	61.8	94.8	62.1
	0.00844907	89.2	90.3	61.6	94.8	62.1
	0.00846065	89	90.2	61.6	94.8	62.1
	0.00847222	88.9	90.1	61.6	94.8	62.1
	0.0084838	88.8	90	61.5	94.8	62
	0.00849537	88.7	89.9	61.5	94.7	64.1
	0.00850694	88.6	89.8	61.4	94.7	64.9
	0.00851852	88.4	89.7	61.4	94.6	65
	0.00853009	88.3	89.6	61.3	94.6	65
	0.00855324	88.1	89.5	61.3	94.5	65
	0.00856481	88.1	89.5	61.2	94.5	65
	0.00857639	87.9	89.3	61.2	94.4	64.9
	0.00858796	87.8	89.2	61.2	94.3	64.9
	0.00859954	87.7	89.1	61.1	94.3	64.8
	0.00861111	87.6	89.1	61.1	94.3	64.8
	0.00862269	87.5	89	61	94.2	64.8
	0.00863426	87.4	88.9	61	94.2	64.7
	0.00864583	87.3	88.8	61	94.1	64.7
	0.00865741	87.2	88.7	60.9	94	64.6
	0.00866898	87.1	88.6	60.9	93.9	64.6
	0.00868056	87	88.5	60.8	93.9	64.5
	0.00869213	86.9	88.4	60.8	93.8	64.5
	0.0087037	86.8	88.3	60.7	93.7	64.4
	0.00871528	86.7	88.3	60.7	93.6	64.4
	0.00872685	86.6	88.2	60.7	93.6	64.3
	0.00873843	86.5	88.1	60.6	93.4	64.3
	0.00875	86.4	88	60.5	93.4	64.2
	0.00876157	86.3	87.9	60.4	93.2	64.2
	0.00877315	86.2	87.8	60.4	92.6	64.2
	0.00878472	86.1	87.8	60.3	92.3	64.1
	0.00880787	86	87.7	60.3	92.2	64
	0.00881944	85.9	87.6	60.2	92	64
	0.00883102	85.8	87.5	60.2	91.9	63.9
	0.00884259	85.7	87.5	60.2	91.8	63.9
	0.00885417	85.6	87.4	60.2	91.7	63.8
	0.00886574	85.5	87.2	60.1	91.5	63.8
	0.00887731	85.4	87.2	60.1	91.4	63.7
	0.00888889	85.4	87.1	60.1	91.3	63.7
	0.00890046	85.3	87	60	91.1	63.7
	0.00891204	85.2	86.9	60	91	63.6
	0.00892361	85.1	86.9	60	90.9	63.6
	0.00893519	85	86.8	59.9	90.8	63.5
	0.00894676	84.9	86.7	59.9	90.7	63.5
	0.00895833	84.8	86.6	59.9	90.5	63.4
	0.00896991	84.7	86.5	59.8	90.5	63.3
	0.00899306	84.6	86.4	59.8	90.3	63.3
	0.00900463	84.4	86.3	59.8	90.2	63.2
	0.0090162	84.3	86.2	59.7	90.1	63.2
	0.00903935	84.2	86.1	59.7	90	63.1
	0.00905093	84.2	86	59.6	89.9	63.1
	0.0090625	84	86	59.6	89.8	63
	0.00907407	84	85.9	59.6	89.7	63
	0.00908565	83.9	85.8	59.6	89.6	63
	0.00909722	83.8	85.7	59.5	89.5	62.9
	0.0091088	83.7	85.7	59.5	89.4	62.9
	0.00912037	83.6	85.6	59.4	89.3	62.8
	0.00913194	83.5	85.5	59.4	89.3	62.8
	0.00914352	83.4	85.4	59.3	89.2	62.7
	0.00916667	83.3	85.3	59.2	89.1	62.7
	0.00917824	83.3	85.2	59.2	89	62.7
	0.00918981	83.2	85.1	59.2	88.9	62.6
	0.00920139	83.1	85.1	59.1	88.8	62.6
	0.00921296	83	85	59.1	88.7	62.5
	0.00922454	82.9	84.9	59.1	88.7	62.5
	0.00923611	82.8	84.8	59	88.6	62.4
	0.00924769	82.7	84.8	59	88.5	62.4
	0.00925926	82.7	84.7	59	88.5	62.4
	0.00927083	82.6	84.6	58.9	88.4	62.3
	0.00928241	82.5	84.5	58.9	88.2	62.3
	0.00929398	82.4	84.4	58.9	88.2	62.2
	0.00930556	82.3	84.4	58.8	88.1	62.2
	0.00931713	82.2	84.3	58.8	88.1	62.1
	0.0093287	82.2	84.2	58.7	88	62.1
	0.00934028	82.1	84.2	58.7	87.9	62
	0.00935185	82	84.1	58.6	87.8	62
	0.00936343	81.9	84	58.6	87.8	62
	0.009375	81.8	83.9	58.6	87.7	61.9
	0.00938657	81.8	83.8	58.6	87.6	61.9
	0.00939815	81.7	83.7	58.5	87.5	61.8
	0.00940972	81.6	83.7	58.5	87.4	61.8
	0.0094213	81.5	83.6	58.5	87.4	61.8
	0.00944444	81.4	83.5	58.5	87.3	61.7
	0.00945602	81.3	83.5	58.4	87.2	61.7
	0.00946759	81.2	83.4	58.4	87.1	61.6
	0.00947917	81.2	83.3	58.4	87.1	61.6
	0.00949074	81.1	83.2	58.3	87	61.6
	0.00950231	81	83.1	58.3	86.9	61.6
	0.00951389	80.9	83.1	58.3	86.9	61.5
	0.00952546	80.9	83	58.2	86.8	61.4
	0.00953704	80.8	82.9	58.2	86.7	61.4
	0.00954861	80.7	82.8	58.2	86.6	61.4
	0.00956019	80.6	82.8	58.1	86.6	61.3
	0.00957176	80.5	82.7	58.1	86.5	61.3
	0.00958333	80.5	82.6	58.1	86.4	61.2
	0.00959491	80.4	82.5	58.1	86.3	61.2
	0.00960648	80.3	82.5	58.1	86.3	61.2
	0.00961806	80.2	82.4	58	86.2	61.1
	0.00962963	80.2	82.3	58	86.1	61.1
	0.00965278	80.1	82.2	58	86	61.1
	0.00966435	80	82.2	57.9	86	61
	0.00967593	79.9	82.1	57.9	85.9	61
	0.0096875	79.8	82.1	57.9	85.8	60.9
	0.00969907	79.8	82.1	57.8	85.7	60.9
	0.00971065	79.7	82	57.8	85.7	60.9
	0.00972222	79.6	81.9	57.8	85.6	60.8
	0.0097338	79.6	81.7	57.8	85.5	60.8
	0.00974537	79.5	81.6	57.7	85.4	60.8
	0.00975694	79.4	81.4	57.7	85.4	60.7
	0.00976852	79.3	81.3	57.7	85.3	60.7
	0.00978009	79.3	81.2	57.6	85.2	60.7
	0.00979167	79.2	81.2	57.6	85.1	60.6
	0.00980324	79.1	81	57.6	85.1	60.6
	0.00981481	79	81	57.5	85	60.5
	0.00982639	79	80.9	57.5	84.9	60.5
	0.00983796	78.9	80.8	57.5	84.9	60.5
	0.00986111	78.8	80.7	57.4	84.8	60.4
	0.00987269	78.8	80.7	57.4	84.7	60.4
	0.00988426	78.7	80.6	57.4	84.6	60.4
	0.00989583	78.6	80.5	57.3	84.6	60.4
	0.00990741	78.6	80.5	57.3	84.5	60.3
	0.00991898	78.5	80.3	57.3	84.4	60.3
	0.00993056	78.4	80.3	57.3	84.3	60.2
	0.00994213	78.4	80.2	57.3	84.2	60.2
	0.0099537	78.3	80.2	57.2	84.1	60.2
	0.00996528	78.2	80.1	57.2	84.1	60.1
	0.00997685	78.1	80	57.2	84	60.1
	0.00998843	78.1	80	57.1	84	60.1
	0.01	78	79.9	57.1	83.9	60
	0.0100116	78	79.9	57.1	83.8	60
	0.0100231	77.9	79.8	57.1	83.8	60
	0.0100347	77.8	79.7	57.1	83.7	59.9
	0.0100463	77.8	79.7	57	83.7	59.9
	0.0100579	77.7	79.6	57	83.6	59.9
	0.0100694	77.7	79.6	56.9	83.5	59.8
	0.010081	77.6	79.5	56.9	83.5	59.8
	0.0101042	77.5	79.4	56.9	83.4	59.8
	0.0101157	77.4	79.3	56.8	83.3	59.7
	0.0101273	77.4	79.3	56.8	83.2	59.7
	0.0101389	77.3	79.2	56.7	83.2	59.7
	0.0101505	77.2	79.2	56.7	83.1	59.6
	0.010162	77.2	79.1	56.7	83.1	59.6
	0.0101736	77.1	79	56.7	83	59.6
	0.0101852	77	79	56.6	82.9	59.5
	0.0101968	77	79	56.6	82.8	59.5
	0.0102083	76.9	78.9	56.6	82.8	59.5
	0.0102199	76.9	78.8	56.5	82.7	59.4
	0.0102315	76.8	78.7	56.5	82.6	59.4
	0.0102431	76.7	78.7	56.5	82.5	59.4
	0.0102546	76.7	78.6	56.5	82.5	59.3
	0.0102662	76.6	78.6	56.4	82.4	59.3
	0.0102778	76.5	78.5	56.4	82.4	59.3
	0.0102894	76.5	78.5	56.4	82.3	59.2
	0.0103009	76.5	78.4	56.4	82.3	59.2
	0.0103125	76.4	78.3	56.4	82.1	59.2
	0.0103241	76.3	78.3	56.3	82.1	59.1
	0.0103356	76.2	78.3	56.3	82.1	59.1
	0.0103472	76.2	78.2	56.3	82	59.1
	0.0103588	76.1	78.1	56.2	81.9	59
	0.0103704	76.1	78.1	56.2	81.9	59
	0.0103819	76	78	56.2	81.8	59
	0.0103935	75.9	78	56.2	81.7	59
	0.0104051	75.9	77.9	56.1	81.7	58.9
	0.0104167	75.8	77.9	56.1	81.6	58.9
	0.0104282	75.8	77.8	56.1	81.6	58.9
	0.0104398	75.7	77.7	56.1	81.5	58.8
	0.0104514	75.7	77.7	56	81.4	58.8
	0.0104745	75.6	77.6	56	81.3	58.8
	0.0104861	75.5	77.5	56	81.3	58.8
	0.0104977	75.5	77.5	56	81.2	58.7
	0.0105093	75.4	77.5	56	81.2	58.7
	0.0105208	75.4	77.4	55.9	81.1	58.7
	0.0105324	75.3	77.4	55.9	81.1	58.6
	0.010544	75.2	77.3	55.9	81	58.6
	0.0105556	75.2	77.2	55.9	80.9	58.6
	0.0105671	75.1	77.2	55.8	80.9	58.5
	0.0105787	75.1	77.1	55.8	80.8	58.5
	0.0105903	75	77.1	55.8	80.8	58.5
	0.0106019	75	77	55.8	80.7	58.4
	0.0106134	74.9	77	55.7	80.6	58.4
	0.010625	74.9	77	55.7	80.6	58.4
	0.0106366	74.8	76.9	55.7	80.5	58.4
	0.0106481	74.7	76.8	55.7	80.4	58.3
	0.0106597	74.7	76.7	55.6	80.4	58.3
	0.0106713	74.6	76.7	55.6	80.3	58.3
	0.0106829	74.6	76.6	55.6	80.3	58.2
	0.0106944	74.5	76.6	55.6	80.2	58.2
	0.0107176	74.4	76.5	55.5	80.1	58.2
	0.0107292	74.4	76.5	55.5	80.1	58.2
	0.0107407	74.3	76.4	55.5	80	58.1
	0.0107523	74.3	76.4	55.5	79.9	58.1
	0.0107639	74.2	76.3	55.5	79.8	58.1
	0.0107755	74.2	76.3	55.4	79.8	58
	0.010787	74.1	76.2	55.4	79.7	58
	0.0107986	74.1	76.1	55.4	79.7	58
	0.0108102	74	76.1	55.4	79.6	58

## Sheet: Fig6
	Temperature mesurments for in vivo swine subject liver during 90W 10 minute microwave ablation
	Thermocouple Measurements							Ablation Probe Measurements
	Device Name:	OctTCTemp2000V2						Probe type:	LK 15
	Device Description:	Eight Channel Thermocouple Temperature Data Logger with Display						Probe settings:	90W, 10min, Liver
	Device ID:	MultiChannel
		Channel 2	Channel 4	Channel 6	Channel 8	Channel 10
	Normalized Time	Thermocouple 1 (°C)	Thermocouple 2 (°C)	Thermocouple 3 (°C)	Thermocouple 4 (°C)	Thermocouple 5 (°C)		Normalized Time	Temperature (°C)
	-0.000104167	35.7	35.6	35.8	35.7	36.1		-5.78704e-05	35
	-9.25926e-05	35.7	35.6	35.8	35.7	36		-5.78704e-05	35
	-8.10185e-05	35.7	35.6	35.8	35.7	36.1		-4.62963e-05	35
	-6.94444e-05	35.7	35.6	35.8	35.7	36.1		-4.62963e-05	35
	-5.78704e-05	35.7	35.7	35.8	35.7	36.1		-3.47222e-05	35
	-3.47222e-05	35.7	35.6	35.8	35.7	36.1		-3.47222e-05	35
	-2.31481e-05	36	35.9	35.8	35.7	37.3		-2.31482e-05	35
	-1.15741e-05	36.1	36.4	35.9	35.8	38.2		-2.31482e-05	35
	0	36.5	36.9	36	35.8	39.2		-1.15741e-05	35
	1.15741e-05	36.6	37.3	36	35.8	40		-1.15741e-05	35
	2.31481e-05	35.9	37.7	36.1	35.8	40.8		0	35
	4.62963e-05	35.6	38	36.2	35.7	41.9		0	35
	5.78704e-05	35.7	38.3	36.2	35.7	42.9		0	47
	6.94444e-05	34.8	38.5	36.3	35.5	43.7		0	47
	8.10185e-05	34	38.6	36.3	35.3	44		1.15741e-05	66
	9.25926e-05	34.6	38.7	36.4	35.1	45		1.15741e-05	66
	0.000104167	34.6	38.7	36.4	35	45.9		2.31481e-05	68
	0.000115741	33.2	38.9	36.5	34.8	46.3		2.31481e-05	68
	0.000127315	33.9	39.1	36.6	34.6	47.2		3.47222e-05	69
	0.000138889	34.4	39.3	36.7	34.4	48		3.47222e-05	69
	0.000150463	34.3	39.6	36.8	34.3	48.4		4.62963e-05	72
	0.000162037	33.5	39.8	37	34.1	48.4		4.62963e-05	72
	0.000173611	34.5	40	37.1	34	49.6		5.78704e-05	79
	0.000185185	34.9	40.2	37.2	33.8	50.4		5.78704e-05	79
	0.000196759	33.8	40.4	37.3	33.6	49.6		6.94444e-05	85
	0.000208333	34.6	40.6	37.4	33.4	50.5		6.94444e-05	85
	0.000219907	35.2	40.9	37.6	33.3	51.7		8.10185e-05	89
	0.000243056	35.1	41.3	37.7	33.2	52.1		8.10185e-05	89
	0.00025463	34.7	41.4	37.9	33	51.3		9.25926e-05	93
	0.000266204	35.5	41.5	37.9	33	52.5		9.25926e-05	93
	0.000277778	35.9	41.7	38	32.8	53.9		0.000104167	100
	0.000289352	35	42.1	38.2	32.7	53.4		0.000104167	100
	0.000300926	36	42.3	38.3	32.7	54		0.000115741	104
	0.0003125	36.7	42.5	38.5	32.6	55		0.000115741	104
	0.000324074	36.8	42.8	38.6	32.5	55.3		0.000127315	108
	0.000335648	35.8	42.9	38.7	32.4	54.1		0.000127315	108
	0.000347222	36.8	42.9	38.8	32.3	55.2		0.000138889	107
	0.000358796	37.3	43.1	38.8	32.3	56.4		0.000138889	107
	0.00037037	36.9	43.4	38.9	32.2	56.4		0.000150463	96
	0.000381944	37.1	43.7	39.1	32.1	56.3		0.000150463	96
	0.000393519	38	43.8	39.2	32.1	57.6		0.000162037	94
	0.000405093	38.3	44.1	39.4	32.1	58		0.000162037	94
	0.000428241	37.4	44.2	39.5	32	56.6		0.000173611	93
	0.000439815	38.3	44.2	39.5	32	57.9		0.000173611	93
	0.000451389	38.7	44.4	39.6	31.9	58.9		0.000185185	92
	0.000462963	37.7	44.7	39.8	31.8	58.1		0.000185185	92
	0.000474537	38.4	44.6	39.8	31.8	58.5		0.000196759	93
	0.000486111	39.1	44.8	39.9	31.8	59.9		0.000196759	93
	0.000497685	39	45	40	31.7	60		0.000208333	93
	0.000509259	38.5	45.3	40.2	31.7	59.4		0.000208333	93
	0.000520833	39.7	45.4	40.3	31.7	60.5		0.000219907	93
	0.000532407	40.1	45.5	40.4	31.7	60.9		0.000219907	93
	0.000543981	39.1	45.6	40.4	31.6	59.9		0.000231481	94
	0.000555556	39.7	45.7	40.5	31.6	60.3		0.000231481	94
	0.00056713	40.4	45.8	40.6	31.7	61.4		0.000243056	93
	0.000590278	40.4	46	40.8	31.6	61.7		0.000243056	93
	0.000601852	40.5	46.3	40.9	31.6	61.2		0.00025463	93
	0.000613426	41.3	46.4	41	31.6	62.2		0.00025463	93
	0.000625	41.4	46.4	41	31.6	62.1		0.000266204	94
	0.000636574	40.5	46.6	41.1	31.6	61.3		0.000266204	94
	0.000648148	41.4	46.7	41.3	31.6	62		0.000277778	92
	0.000659722	41.9	46.8	41.4	31.6	63		0.000277778	92
	0.000671296	42	47	41.5	31.6	63.1		0.000289352	93
	0.00068287	41.9	47.3	41.6	31.6	62.7		0.000289352	93
	0.000694444	42.8	47.4	41.7	31.6	63.7		0.000300926	92
	0.000706019	43.2	47.6	41.8	31.7	64.1		0.000300926	92
	0.000717593	42.6	47.9	41.9	31.7	63.4		0.0003125	92
	0.000729167	43.5	48	42	31.7	64		0.0003125	92
	0.000740741	44	48.1	42.2	31.7	64.8		0.000324074	92
	0.000752315	44.2	48.4	42.2	31.8	64.8		0.000324074	92
	0.000775463	44	48.7	42.4	31.8	64.3		0.000335648	94
	0.000787037	44.8	48.8	42.5	31.8	65.2		0.000335648	94
	0.000798611	45.2	48.9	42.6	31.9	65.5		0.000347222	93
	0.000810185	44.7	49.2	42.7	31.8	65		0.000347222	93
	0.000821759	45.4	49.3	42.8	31.9	65.3		0.000358796	86
	0.000833333	45.9	49.5	42.9	31.9	66		0.000358796	86
	0.000844907	45.8	49.7	43.1	31.9	65.8		0.00037037	90
	0.000856481	45.9	49.9	43.2	31.9	65.5		0.00037037	90
	0.00087963	46.6	50	43.3	32	66.4		0.000381944	95
	0.000891204	46.7	50.1	43.4	32.1	66.4		0.000381944	95
	0.000902778	46.2	50.3	43.5	32	65.8		0.000393519	93
	0.000914352	47.1	50.4	43.6	32.1	66.5		0.000393519	93
	0.000925926	47.4	50.5	43.7	32.1	66.9		0.000405093	93
	0.0009375	47.1	50.7	43.8	32.2	66.5		0.000405093	93
	0.000949074	47.2	50.8	43.9	32.2	66.4		0.000416667	93
	0.000960648	47.8	50.9	44	32.2	67.1		0.000416667	93
	0.000972222	48.1	51	44	32.3	67.4		0.000428241	94
	0.000983796	47.6	51.2	44.2	32.2	66.7		0.000428241	94
	0.00099537	48.1	51.2	44.2	32.3	66.9		0.000439815	93
	0.00100694	48.6	51.3	44.3	32.4	67.6		0.000439815	93
	0.00101852	48.6	51.5	44.4	32.4	67.3		0.000451389	91
	0.00103009	48.2	51.6	44.5	32.4	66.4		0.000451389	91
	0.00104167	48.9	51.6	44.6	32.4	67.2		0.000462963	96
	0.00106481	49.2	51.7	44.7	32.5	67.4		0.000462963	96
	0.00108796	49.1	51.9	44.9	32.5	67.1		0.000474537	94
	0.00109954	49.4	51.9	44.9	32.5	67.7		0.000474537	94
	0.00111111	49	52.1	45.1	32.6	66.9		0.000486111	94
	0.00113426	49.6	52.1	45.1	32.6	67.6		0.000486111	94
	0.00114583	49.9	52.2	45.1	32.7	68		0.000497685	93
	0.00115741	49.7	52.3	45.2	32.7	67.6		0.000497685	93
	0.00116898	49.5	52.3	45.3	32.7	67		0.000509259	96
	0.00118056	49.6	52.1	45.2	32.7	67.2		0.000509259	96
	0.00119213	49.4	51.9	45.2	32.7	67.1		0.000520833	96
	0.0012037	48.6	51.8	45.3	32.7	66.4		0.000520833	96
	0.00121528	49	51.8	45.3	32.7	67.2		0.000532407	97
	0.00122685	49.3	51.8	45.4	32.7	67.8		0.000532407	97
	0.00123843	49.2	51.9	45.4	32.8	67.7		0.000543981	93
	0.00125	49	52	45.5	32.7	67.5		0.000543981	93
	0.00126157	49.5	52	45.6	32.8	68.4		0.000555556	93
	0.00127315	49.7	52.1	45.6	32.8	68.8		0.000555556	93
	0.00128472	49.3	52.1	45.7	32.8	68.2		0.00056713	91
	0.0012963	49.7	52.1	45.8	32.8	69		0.00056713	91
	0.00130787	50.1	52.3	45.8	32.9	69.6		0.000578704	96
	0.00131944	50.1	52.4	45.8	32.9	69.5		0.000578704	96
	0.00133102	49.9	52.4	45.9	32.9	69.2		0.000590278	96
	0.00134259	50.3	52.5	45.9	32.9	70.1		0.000590278	96
	0.00136574	50.6	52.6	46	33	70.5		0.000601852	95
	0.00137731	50.3	52.7	46.1	33	69.9		0.000601852	95
	0.00138889	50.7	52.8	46.1	33	70.3		0.000613426	95
	0.00140046	51	52.8	46.2	33.1	70.9		0.000613426	95
	0.00141204	51.1	53	46.2	33.1	70.8		0.000625	95
	0.00142361	50.7	53.1	46.3	33.1	70.2		0.000625	95
	0.00143519	51.3	53.1	46.4	33.2	71		0.000636574	94
	0.00144676	51.6	53.2	46.4	33.2	71.3		0.000636574	94
	0.00145833	51.2	53.3	46.5	33.2	70.7		0.000648148	92
	0.00146991	51.4	53.4	46.6	33.2	70.9		0.000648148	92
	0.00148148	51.8	53.5	46.5	33.3	71.5		0.000659722	97
	0.00149306	51.9	53.6	46.6	33.3	71.3		0.000659722	97
	0.00150463	51.5	53.6	46.7	33.3	70.8		0.000671296	96
	0.0015162	52	53.7	46.7	33.3	71.4		0.000671296	96
	0.00153935	52.3	53.8	46.7	33.4	71.7		0.00068287	95
	0.00155093	51.9	53.8	46.8	33.4	71		0.00068287	95
	0.0015625	52.3	53.9	46.9	33.4	71.5		0.000694444	95
	0.00157407	52.5	53.9	46.8	33.5	71.8		0.000694444	95
	0.00158565	52.5	54	46.9	33.5	71.5		0.000706019	95
	0.00159722	52.2	54.1	47	33.5	71		0.000706019	95
	0.0016088	52.7	54.1	47	33.6	71.6		0.000717593	94
	0.00162037	52.9	54.2	47	33.6	71.8		0.000717593	94
	0.00163194	52.7	54.3	47	33.6	71.3		0.000729167	94
	0.00164352	52.7	54.4	47.1	33.6	71.3		0.000729167	94
	0.00165509	53.1	54.5	47.1	33.6	71.9		0.000740741	94
	0.00166667	53.1	54.6	47.1	33.7	71.6		0.000740741	94
	0.00167824	52.7	54.6	47.2	33.6	71		0.000752315	94
	0.00170139	53.2	54.7	47.3	33.7	71.9		0.000752315	94
	0.00171296	53.4	54.8	47.2	33.8	72		0.000763889	94
	0.00172454	52.9	54.8	47.3	33.7	71.1		0.000763889	94
	0.00173611	53.2	54.8	47.3	33.8	71.5		0.000775463	94
	0.00174769	53.4	54.9	47.4	33.8	71.8		0.000775463	94
	0.00175926	53.1	54.9	47.4	33.8	71.1		0.000787037	93
	0.00177083	53.2	54.9	47.5	33.8	71.1		0.000787037	93
	0.00178241	53.4	54.9	47.5	33.9	71.8		0.000798611	93
	0.00179398	53.4	55	47.4	33.9	71.8		0.000798611	93
	0.00180556	53	55	47.5	33.9	71		0.000810185	93
	0.00181713	53.4	55.1	47.5	33.9	71.7		0.000810185	93
	0.00184028	53.6	55.1	47.5	33.9	72.2		0.000821759	93
	0.00185185	53.3	55.2	47.6	33.9	71.4		0.000821759	93
	0.00186343	53.4	55.2	47.6	34	71.6		0.000833333	93
	0.001875	53.6	55.2	47.6	34	72.2		0.000833333	93
	0.00188657	53.6	55.2	47.6	34	72		0.000844907	92
	0.00189815	53.2	55.2	47.7	34	71.1		0.000844907	92
	0.00190972	53.6	55.2	47.7	34	72		0.000856481	93
	0.0019213	53.8	55.3	47.6	34	72.4		0.000856481	93
	0.00193287	53.5	55.3	47.7	34	71.9		0.000868056	94
	0.00194444	53.5	55.3	47.7	34	71.8		0.000868056	94
	0.00195602	53.7	55.3	47.7	34.1	72		0.00087963	93
	0.00196759	53.5	55.2	47.6	34.1	71.6		0.00087963	93
	0.00197917	52.7	55.1	47.7	34	70.4		0.000891204	93
	0.00200231	52.9	55	47.6	34	71.1		0.000891204	93
	0.00201389	53	55	47.6	34	71.4		0.000902778	93
	0.00202546	52.7	54.9	47.6	34	70.8		0.000902778	93
	0.00203704	52.6	54.9	47.7	34	70.3		0.000914352	94
	0.00204861	52.9	54.9	47.6	34	71.2		0.000914352	94
	0.00206019	52.9	55	47.6	34	71		0.000925926	94
	0.00207176	52.6	55	47.7	34	70.3		0.000925926	94
	0.00208333	52.9	55	47.7	34	71.2		0.0009375	94
	0.00209491	53.1	55	47.7	34	71.6		0.0009375	94
	0.00210648	52.7	55.1	47.7	34	70.9		0.000949074	94
	0.00211806	53	55.1	47.8	34.1	71.3		0.000949074	94
	0.00212963	53.2	55.1	47.7	34.1	72.1		0.000960648	94
	0.0021412	53.2	55.2	47.7	34.1	72.1		0.000960648	94
	0.00215278	52.8	55.2	47.8	34.1	71.4		0.000972222	94
	0.00217593	53.2	55.2	47.7	34.1	72.4		0.000972222	94
	0.0021875	53.4	55.2	47.8	34.1	72.8		0.000983796	93
	0.00219907	53	55.3	47.8	34.1	72		0.000983796	93
	0.00221065	53.2	55.3	47.8	34.1	72.6		0.00099537	94
	0.00222222	53.4	55.4	47.8	34.2	73.1		0.00099537	94
	0.0022338	53.4	55.4	47.7	34.1	73.1		0.00100694	94
	0.00224537	53	55.4	47.9	34.1	72.3		0.00100694	94
	0.00225694	53.4	55.4	47.8	34.2	73.3		0.00101852	93
	0.00226852	53.6	55.5	47.8	34.2	73.5		0.00101852	93
	0.00228009	53.1	55.5	47.9	34.1	72.6		0.00103009	93
	0.00229167	53.4	55.6	47.9	34.1	73		0.00103009	93
	0.00230324	53.7	55.6	47.8	34.2	73.6		0.00104167	93
	0.00231481	53.7	55.7	47.8	34.2	73.5		0.00104167	93
	0.00233796	53.4	55.7	47.9	34.2	72.7		0.00105324	93
	0.00234954	53.7	55.8	47.8	34.2	73.6		0.00105324	93
	0.00236111	53.8	55.8	47.8	34.2	73.7		0.00106481	93
	0.00237269	53.3	55.8	47.9	34.2	72.8		0.00106481	93
	0.00238426	53.7	55.8	47.9	34.3	73.2		0.00107639	94
	0.00239583	53.8	55.9	47.8	34.3	73.6		0.00107639	94
	0.00240741	53.6	55.9	47.8	34.3	73.2		0.00108796	93
	0.00243056	53.6	56	47.9	34.3	73		0.00108796	93
	0.00244213	53.9	56.1	47.8	34.3	73.5		0.00109954	92
	0.00246528	53.4	56.1	47.9	34.3	72.6		0.00109954	92
	0.00247685	53.8	56.1	47.9	34.3	73.1		0.00111111	93
	0.00248843	54	56.1	47.9	34.3	73.5		0.00111111	93
	0.0025	53.6	56.2	47.9	34.3	72.8		0.00112269	93
	0.00251157	53.6	56.2	48	34.3	72.6		0.00112269	93
	0.00252315	53.9	56.2	47.8	34.4	73.3		0.00113426	93
	0.00253472	54	56.2	47.9	34.4	73.3		0.00113426	93
	0.0025463	53.4	56.2	48	34.3	72.3		0.00114583	92
	0.00255787	53.8	56.3	47.9	34.4	72.9		0.00114583	92
	0.00256944	54	56.3	47.8	34.4	73.3		0.00115741	92
	0.00258102	53.6	56.4	47.9	34.4	72.7		0.00115741	92
	0.00259259	53.6	56.3	47.9	34.4	72.4		0.00116898	93
	0.00261574	54	56.4	47.9	34.4	73.1		0.00116898	93
	0.00262731	54	56.4	47.9	34.4	73		0.00118056	93
	0.00263889	53.5	56.4	47.9	34.4	72.2		0.00118056	93
	0.00265046	53.9	56.4	47.9	34.4	72.8		0.00119213	92
	0.00266204	54	56.4	47.9	34.4	73		0.00119213	92
	0.00267361	53.6	56.4	47.9	34.4	72.4		0.0012037	86
	0.00268519	53.8	56.5	47.9	34.4	72.5		0.0012037	86
	0.00269676	54	56.5	47.9	34.4	72.9		0.00121528	97
	0.00270833	53.9	56.5	47.9	34.5	72.7		0.00121528	97
	0.00273148	53.5	56.5	48	34.4	72		0.00122685	97
	0.00274306	53.9	56.5	47.9	34.5	72.7		0.00122685	97
	0.00275463	54	56.6	47.9	34.4	72.8		0.00123843	96
	0.0027662	53.3	56.5	47.9	34.5	72		0.00123843	96
	0.00277778	53.7	56.5	47.9	34.5	72.2		0.00125	96
	0.00278935	54	56.5	47.9	34.5	72.6		0.00125	96
	0.00280093	53.5	56.6	48	34.5	72.1		0.00126157	96
	0.0028125	53.5	56.6	48	34.5	71.8		0.00126157	96
	0.00282407	53.9	56.6	47.9	34.5	72.5		0.00127315	96
	0.00283565	54	56.6	47.9	34.5	72.5		0.00127315	96
	0.00284722	53.3	56.6	48	34.5	71.8		0.00128472	95
	0.00287037	53.8	56.6	47.9	34.5	72.3		0.00128472	95
	0.00288194	54	56.6	47.9	34.5	72.5		0.0012963	95
	0.00289352	53.7	56.7	47.9	34.5	72.2		0.0012963	95
	0.00290509	53.4	56.7	48	34.5	71.7		0.00130787	95
	0.00291667	53.9	56.7	47.9	34.5	72.3		0.00130787	95
	0.00292824	54	56.7	47.9	34.5	72.4		0.00131944	95
	0.00293981	53.4	56.7	48	34.5	71.8		0.00131944	95
	0.00295139	53.7	56.8	47.9	34.5	71.9		0.00133102	95
	0.00296296	53.9	56.8	47.9	34.5	72.3		0.00133102	95
	0.00297454	53.8	56.8	47.9	34.5	72.2		0.00134259	95
	0.00298611	53.2	56.7	48	34.5	71.5		0.00134259	95
	0.00299769	53.8	56.8	47.9	34.5	72.1		0.00135417	95
	0.00300926	54	56.8	47.9	34.5	72.3		0.00135417	95
	0.00302083	53.3	56.8	48	34.5	71.6		0.00136574	95
	0.00303241	53.6	56.8	48	34.5	71.7		0.00136574	95
	0.00305556	53.9	56.8	47.9	34.6	72.1		0.00137731	95
	0.00306713	53.4	56.9	48	34.6	71.4		0.00137731	95
	0.0030787	53.4	56.8	48	34.6	71.3		0.00138889	95
	0.00309028	53.9	56.9	47.9	34.6	71.8		0.00138889	95
	0.00310185	53.7	56.9	47.9	34.6	71.6		0.00140046	95
	0.00311343	53.2	56.9	48	34.6	70.9		0.00140046	95
	0.003125	53.8	56.9	47.9	34.6	71.6		0.00141204	95
	0.00313657	54	57	47.9	34.6	71.7		0.00141204	95
	0.00314815	53.3	57	48	34.6	71.2		0.00142361	96
	0.00315972	53.5	57	48	34.6	71.1		0.00142361	96
	0.0031713	53.9	56.8	47.9	34.6	70.8		0.00143519	96
	0.00319444	53.2	56.6	47.8	34.6	69.4		0.00143519	96
	0.00320602	52.5	56.5	47.9	34.6	68.5		0.00144676	95
	0.00321759	52.8	56.2	47.7	34.6	68.5		0.00144676	95
	0.00322917	52.9	56.1	47.6	34.6	68.8		0.00145833	96
	0.00324074	52	56.1	47.8	34.6	68.5		0.00145833	96
	0.00325231	52.4	56.1	47.7	34.5	68.7		0.00146991	96
	0.00326389	52.8	56.1	47.7	34.6	69.3		0.00146991	96
	0.00327546	52.7	56.1	47.7	34.6	69.5		0.00148148	96
	0.00328704	52.3	56.2	47.8	34.5	69.5		0.00148148	96
	0.00331019	52.8	56.1	47.6	34.6	69.8		0.00149306	95
	0.00332176	52.4	55.9	47.6	34.5	70.2		0.00149306	95
	0.00333333	51.6	55.9	47.6	34.5	70.2		0.00150463	95
	0.00334491	52.4	55.9	47.6	34.5	71.1		0.00150463	95
	0.00335648	52.6	55.9	47.5	34.6	71.6		0.0015162	96
	0.00336806	52.1	56	47.6	34.6	71.5		0.0015162	96
	0.00337963	52.2	56.1	47.7	34.5	71.5		0.00152778	96
	0.0033912	52.8	56.1	47.7	34.6	72.3		0.00152778	96
	0.00340278	52.7	56.2	47.6	34.6	72.5		0.00153935	95
	0.00341435	52.3	56.3	47.7	34.6	72.3		0.00153935	95
	0.00342593	52.9	56.3	47.7	34.6	72.6		0.00155093	96
	0.00344907	52.7	56	47.5	34.6	72.8		0.00155093	96
	0.00346065	51.7	55.9	47.5	34.5	72.9		0.0015625	96
	0.00347222	52.1	55.9	47.5	34.5	73.5		0.0015625	96
	0.0034838	52.4	56	47.5	34.5	74.1		0.00157407	96
	0.00349537	52.4	56	47.5	34.5	74.2		0.00157407	96
	0.00350694	51.7	56.1	47.6	34.5	73.8		0.00158565	96
	0.00351852	52.6	56.2	47.5	34.5	74.4		0.00158565	96
	0.00353009	52.8	56.2	47.5	34.6	74.6		0.00159722	96
	0.00354167	52.4	56.3	47.6	34.6	74.5		0.00159722	96
	0.00355324	52.7	56.4	47.6	34.6	74.5		0.0016088	96
	0.00356481	53.2	56.5	47.6	34.6	74.9		0.0016088	96
	0.00357639	53.1	56.6	47.6	34.6	74.9		0.00162037	96
	0.00358796	52.5	56.7	47.7	34.6	74.6		0.00162037	96
	0.00359954	53.3	56.7	47.6	34.6	75		0.00163194	95
	0.00362269	53.6	56.8	47.6	34.7	75.2		0.00163194	95
	0.00363426	52.8	56.9	47.7	34.6	74.8		0.00164352	96
	0.00364583	52.7	56.7	47.6	34.6	74.4		0.00164352	96
	0.00365741	52.7	56.3	47.5	34.6	75.1		0.00165509	95
	0.00366898	52.1	56	47.4	34.6	75.4		0.00165509	95
	0.00368056	51	55.9	47.4	34.6	75.6		0.00166667	95
	0.00369213	51.8	55.9	47.3	34.6	76.4		0.00166667	95
	0.0037037	52	55.9	47.3	34.6	76.9		0.00167824	95
	0.00371528	51.4	55.9	47.4	34.6	76.6		0.00167824	95
	0.00372685	51.8	56	47.4	34.6	76.7		0.00168981	95
	0.00373843	52.1	56.1	47.4	34.6	77.1		0.00168981	95
	0.00375	52.3	56.2	47.3	34.6	77.2		0.00170139	94
	0.00376157	51.6	56.2	47.5	34.6	76.8		0.00170139	94
	0.00378472	52.6	56.3	47.4	34.6	77.3		0.00171296	94
	0.0037963	52.9	56.4	47.4	34.6	77.5		0.00171296	94
	0.00380787	52.3	56.5	47.5	34.6	77.2		0.00172454	94
	0.00381944	52.9	56.6	47.5	34.6	77.3		0.00172454	94
	0.00383102	53.2	56.7	47.5	34.7	77.5		0.00173611	94
	0.00384259	53.2	56.8	47.5	34.7	77.4		0.00173611	94
	0.00385417	52.6	57	47.6	34.7	77.1		0.00174769	93
	0.00386574	53.6	57	47.6	34.7	77.4		0.00174769	93
	0.00387731	53.8	57.1	47.6	34.7	77.5		0.00175926	93
	0.00388889	53.2	57.3	47.7	34.7	77.2		0.00175926	93
	0.00390046	53.7	57.4	47.7	34.8	77.2		0.00177083	94
	0.00391204	54.1	57.5	47.7	34.8	77.4		0.00177083	94
	0.00393519	53.9	57.6	47.7	34.8	77.2		0.00178241	94
	0.00394676	53.5	57.6	47.7	34.8	76.9		0.00178241	94
	0.00395833	54.3	57.7	47.7	34.9	77.3		0.00179398	94
	0.00396991	54.5	57.8	47.7	34.9	77.3		0.00179398	94
	0.00398148	53.7	57.9	47.8	34.9	76.9		0.00180556	93
	0.00399306	54.3	58	47.8	34.9	77		0.00180556	93
	0.00400463	54.7	58	47.7	35	77.2		0.00181713	93
	0.0040162	54.6	58.1	47.8	35	77		0.00181713	93
	0.00402778	53.9	58.2	47.9	35	76.7		0.0018287	94
	0.00403935	54.9	58.3	47.8	35	77		0.0018287	94
	0.00405093	55.1	58.3	47.8	35	77.1		0.00184028	93
	0.0040625	54.4	58.4	47.9	35	76.8		0.00184028	93
	0.00407407	54.6	58.4	47.9	35	76.6		0.00185185	92
	0.00408565	55.1	58.5	47.9	35.1	76.9		0.00185185	92
	0.00409722	55.2	58.5	47.9	35.1	76.8		0.00186343	93
	0.0041088	54.3	58.6	48	35.1	76.5		0.00186343	93
	0.00412037	55.1	58.7	48	35.1	76.6		0.001875	93
	0.00413194	55.4	58.7	48	35.2	76.7		0.001875	93
	0.00414352	55.2	58.8	48	35.1	76.6		0.00188657	92
	0.00415509	54.6	58.9	48.1	35.2	76.2		0.00188657	92
	0.00416667	55.5	58.9	48	35.2	76.5		0.00189815	92
	0.00417824	55.6	59	48	35.2	76.5		0.00189815	92
	0.00420139	54.6	59.1	48.1	35.2	76.1		0.00190972	93
	0.00421296	55.5	59.1	48.1	35.2	76.3		0.00190972	93
	0.00422454	55.7	59.1	48.1	35.2	76.4		0.0019213	93
	0.00423611	55.3	59.2	48.1	35.3	76.2		0.0019213	93
	0.00424769	54.9	59.2	48.2	35.2	75.9		0.00193287	92
	0.00425926	55.7	59.3	48.1	35.2	76.2		0.00193287	92
	0.00427083	55.8	59.3	48.1	35.3	76.1		0.00194444	93
	0.00428241	54.9	59.4	48.2	35.3	75.9		0.00194444	93
	0.00429398	55.5	59.4	48.2	35.3	75.9		0.00195602	93
	0.00430556	55.9	59.5	48.2	35.3	76		0.00195602	93
	0.00431713	55.8	59.5	48.2	35.3	75.9		0.00196759	93
	0.0043287	55	59.5	48.3	35.3	75.5		0.00196759	93
	0.00434028	55.8	59.6	48.3	35.3	75.9		0.00197917	92
	0.00435185	56	59.6	48.2	35.4	75.9		0.00197917	92
	0.00436343	55.3	59.6	48.3	35.3	75.7		0.00199074	92
	0.00438657	55.6	59.7	48.3	35.4	75.6		0.00199074	92
	0.00439815	56	59.8	48.3	35.4	75.6		0.00200231	92
	0.0044213	55	59.9	48.4	35.4	75.3		0.00200231	92
	0.00443287	56	59.9	48.4	35.4	75.5		0.00201389	95
	0.00444444	56.3	60	48.3	35.4	75.4		0.00201389	95
	0.00445602	55.1	60.1	48.5	35.4	75		0.00202546	94
	0.00446759	56	60.1	48.4	35.4	75.1		0.00202546	94
	0.00449074	56.4	60.1	48.4	35.4	75.2		0.00203704	93
	0.00450231	55.6	60.2	48.4	35.4	75		0.00203704	93
	0.00451389	55.5	60.2	48.5	35.4	74.9		0.00204861	93
	0.00452546	56.2	60.2	48.4	35.4	75.1		0.00204861	93
	0.00453704	56.1	60.3	48.4	35.4	75		0.00206019	93
	0.00454861	55.1	60.3	48.5	35.4	74.8		0.00206019	93
	0.00456019	56	60.3	48.5	35.4	75		0.00207176	94
	0.00457176	56.3	60.3	48.4	35.4	75.1		0.00207176	94
	0.00458333	55.6	60.4	48.5	35.4	74.9		0.00208333	93
	0.00459491	55.5	60.4	48.5	35.4	74.7		0.00208333	93
	0.00460648	56.2	60.4	48.5	35.4	75		0.00209491	93
	0.00461806	56.1	60.5	48.5	35.4	74.9		0.00209491	93
	0.00462963	55.1	60.5	48.6	35.4	74.5		0.00210648	93
	0.0046412	56	60.6	48.6	35.4	74.7		0.00210648	93
	0.00465278	56.3	60.6	48.5	35.4	74.8		0.00211806	93
	0.00466435	55.7	60.6	48.6	35.4	74.6		0.00211806	93
	0.0046875	55.5	60.6	48.6	35.4	74.4		0.00212963	93
	0.00469907	56.4	60.7	48.5	35.5	74.7		0.00212963	93
	0.00472222	55.2	60.8	48.6	35.5	74.4		0.0021412	92
	0.0047338	56	60.8	48.6	35.5	74.5		0.0021412	92
	0.00474537	56.4	60.8	48.5	35.5	74.6		0.00215278	91
	0.00475694	56	60.9	48.6	35.5	74.4		0.00215278	91
	0.00476852	55.5	60.9	48.6	35.5	74.2		0.00216435	92
	0.00478009	56.4	61	48.6	35.5	74.4		0.00216435	92
	0.00479167	56.6	61	48.6	35.5	74.4		0.00217593	92
	0.00480324	55.4	61	48.7	35.5	74.1		0.00217593	92
	0.00481481	56.3	61	48.6	35.5	74.3		0.0021875	91
	0.00482639	56.6	61.1	48.6	35.5	74.4		0.0021875	91
	0.00483796	56.1	61.1	48.6	35.5	74.2		0.00219907	91
	0.00484954	55.6	61.1	48.7	35.5	74.1		0.00219907	91
	0.00486111	56.4	61.1	48.6	35.5	74.4		0.00221065	91
	0.00488426	56.7	61.2	48.6	35.5	74.4		0.00221065	91
	0.00489583	55.5	61.2	48.6	35.5	74.1		0.00222222	92
	0.00490741	56.2	61.2	48.7	35.5	74.2		0.00222222	92
	0.00491898	56.6	61.2	48.6	35.6	74.4		0.0022338	91
	0.00493056	55.9	61.3	48.6	35.6	74.2		0.0022338	91
	0.00494213	55.8	61.3	48.7	35.6	74.1		0.00224537	91
	0.0049537	56.5	61.3	48.6	35.6	74.4		0.00224537	91
	0.00496528	56.5	61.3	48.6	35.6	74.4		0.00225694	91
	0.00497685	55.3	61.4	48.7	35.5	74.1		0.00225694	91
	0.005	56.3	61.4	48.6	35.6	74.2		0.00226852	91
	0.00501157	56.6	61.4	48.6	35.6	74.2		0.00226852	91
	0.00502315	55.3	61.5	48.7	35.6	73.9		0.00228009	91
	0.00503472	56.1	61.5	48.7	35.6	74.1		0.00228009	91
	0.0050463	56.5	61.5	48.6	35.6	74.2		0.00229167	92
	0.00505787	56.1	61.5	48.6	35.6	74.1		0.00229167	92
	0.00506944	55.4	61.5	48.7	35.6	73.9		0.00230324	91
	0.00508102	56.4	61.5	48.6	35.6	74.1		0.00230324	91
	0.00509259	56.4	61.5	48.6	35.6	74.1		0.00231481	93
	0.00511574	55.2	61.6	48.7	35.6	73.8		0.00231481	93
	0.00512731	56.2	61.5	48.7	35.6	74		0.00232639	92
	0.00513889	56.4	61.6	48.6	35.6	74		0.00232639	92
	0.00515046	55.1	61.6	48.7	35.6	73.8		0.00233796	91
	0.00516204	56.1	61.6	48.6	35.6	74		0.00233796	91
	0.00517361	56.4	61.6	48.6	35.6	74.1		0.00234954	91
	0.00518519	55.9	61.7	48.6	35.6	74		0.00234954	91
	0.00520833	55.6	61.6	48.7	35.6	73.9		0.00236111	91
	0.00521991	56.2	61.7	48.6	35.6	74.1		0.00236111	91
	0.00523148	56.4	61.7	48.6	35.6	74.1		0.00237269	91
	0.00524306	55.1	61.8	48.7	35.6	73.8		0.00237269	91
	0.00525463	56	61.8	48.6	35.6	73.9		0.00238426	91
	0.0052662	56.5	61.8	48.6	35.6	74		0.00238426	91
	0.00527778	55.7	61.9	48.7	35.6	73.8		0.00239583	91
	0.00528935	55.5	61.9	48.7	35.6	73.8		0.00239583	91
	0.00530093	56.4	61.9	48.6	35.6	74		0.00240741	91
	0.0053125	56.5	61.9	48.6	35.6	74		0.00240741	91
	0.00532407	55.2	62	48.6	35.6	73.8		0.00241898	91
	0.00533565	56.1	62	48.7	35.6	73.9		0.00241898	91
	0.00534722	56.6	62	48.6	35.6	74.1		0.00243056	91
	0.0053588	56.1	62.1	48.6	35.6	74		0.00243056	91
	0.00537037	55.4	62.1	48.7	35.6	73.9		0.00244213	91
	0.00538194	56.4	62.1	48.6	35.6	74		0.00244213	91
	0.00540509	56.6	62.1	48.6	35.6	74		0.0024537	91
	0.00541667	55.5	62.2	48.7	35.6	73.9		0.0024537	91
	0.00542824	56.3	62.2	48.7	35.6	73.9		0.00246528	90
	0.00543981	56.7	62.3	48.7	35.6	74		0.00246528	90
	0.00545139	56.3	62.4	48.7	35.6	73.9		0.00247685	91
	0.00546296	55.8	62.4	48.8	35.6	73.7		0.00247685	91
	0.00547454	56.6	62.4	48.7	35.6	73.9		0.00248843	91
	0.00548611	56.8	62.5	48.7	35.7	73.9		0.00248843	91
	0.00549769	55.6	62.5	48.7	35.6	73.7		0.0025	91
	0.00550926	56.3	62.5	48.8	35.6	73.8		0.0025	91
	0.00552083	56.8	62.5	48.7	35.7	73.8		0.00251157	91
	0.00553241	56.3	62.6	48.7	35.6	73.7		0.00251157	91
	0.00554398	55.7	62.6	48.8	35.7	73.6		0.00252315	91
	0.00555556	56.6	62.6	48.8	35.7	73.8		0.00252315	91
	0.00556713	56.9	62.6	48.7	35.6	73.8		0.00253472	91
	0.0055787	55.9	62.7	48.7	35.7	73.7		0.00253472	91
	0.00559028	56.1	62.7	48.8	35.6	73.6		0.0025463	90
	0.00560185	56.8	62.7	48.8	35.6	73.8		0.0025463	90
	0.00561343	56.9	62.8	48.7	35.7	73.7		0.00255787	91
	0.005625	55.6	62.9	48.8	35.7	73.5		0.00255787	91
	0.00564815	56.6	62.8	48.8	35.7	73.6		0.00256944	91
	0.00565972	57	62.9	48.7	35.7	73.7		0.00256944	91
	0.0056713	56.5	62.9	48.8	35.7	73.6		0.00258102	91
	0.00568287	55.8	63	48.8	35.7	73.4		0.00258102	91
	0.00569444	56.9	63	48.8	35.7	73.6		0.00259259	90
	0.00570602	57.1	63	48.8	35.7	73.6		0.00259259	90
	0.00571759	55.7	63.1	48.9	35.6	73.5		0.00260417	90
	0.00572917	56.7	63	48.9	35.7	73.6		0.00260417	90
	0.00574074	57.1	63.1	48.8	35.7	73.6		0.00261574	92
	0.00575231	56.3	63.2	48.9	35.7	73.5		0.00261574	92
	0.00576389	56.1	63.2	48.9	35.7	73.3		0.00262731	91
	0.00578704	57.1	63.3	48.9	35.6	73.3		0.00262731	91
	0.00579861	57.1	63.4	48.8	35.7	73.2		0.00263889	90
	0.00581019	55.8	63.4	48.9	35.7	73		0.00263889	90
	0.00582176	56.7	63.3	48.9	35.7	73.2		0.00265046	90
	0.00583333	57.3	63.4	48.8	35.7	73.3		0.00265046	90
	0.00584491	56.2	63.4	48.8	35.6	73.2		0.00266204	90
	0.00585648	56.2	63.3	48.9	35.6	73.2		0.00266204	90
	0.00586806	57	63.3	48.9	35.6	73.4		0.00267361	90
	0.00587963	56.9	63.3	48.8	35.6	73.3		0.00267361	90
	0.0058912	55.6	63.3	48.9	35.6	73.2		0.00268519	90
	0.00590278	56.7	63.3	48.9	35.6	73.3		0.00268519	90
	0.00591435	57	63.3	48.8	35.6	73.5		0.00269676	90
	0.00592593	56.4	63.3	48.8	35.6	73.3		0.00269676	90
	0.0059375	55.8	63.3	48.9	35.6	73.3		0.00270833	90
	0.00594907	56.8	63.3	48.9	35.6	73.5		0.00270833	90
	0.00596065	57	63.3	48.8	35.6	73.6		0.00271991	90
	0.00597222	55.6	63.3	48.9	35.6	73.4		0.00271991	90
	0.0059838	56.3	63.3	48.9	35.6	73.5		0.00273148	90
	0.00600694	57	63.3	48.8	35.6	73.6		0.00273148	90
	0.00601852	56	63.3	48.9	35.6	73.5		0.00274306	90
	0.00603009	55.7	63.3	48.9	35.6	73.5		0.00274306	90
	0.00604167	56.7	63.2	48.8	35.6	73.7		0.00275463	88
	0.00605324	56.8	63.3	48.8	35.6	73.7		0.00275463	88
	0.00606481	55.4	63.3	48.9	35.6	73.6		0.0027662	90
	0.00607639	56.4	63.3	48.9	35.6	73.8		0.0027662	90
	0.00608796	56.8	63.3	48.8	35.6	73.9		0.00277778	90
	0.00609954	55.7	63.3	48.9	35.6	73.7		0.00277778	90
	0.00612269	56	63.3	48.9	35.6	73.8		0.00278935	90
	0.00613426	56.6	63.3	48.8	35.6	73.9		0.00278935	90
	0.00614583	56.6	63.3	48.8	35.6	73.9		0.00280093	89
	0.00615741	55.1	63.3	48.9	35.6	73.8		0.00280093	89
	0.00616898	56.2	63.3	48.9	35.6	73.9		0.0028125	89
	0.00618056	56.7	63.3	48.8	35.6	74		0.0028125	89
	0.00619213	55.9	63.3	48.8	35.6	73.9		0.00282407	90
	0.0062037	55.7	63.3	48.9	35.6	73.8		0.00282407	90
	0.00621528	56.5	63.4	48.8	35.6	74		0.00283565	90
	0.00622685	56.7	63.4	48.8	35.6	74		0.00283565	90
	0.00623843	55.3	63.4	48.8	35.6	73.8		0.00284722	89
	0.00625	56.1	63.5	48.9	35.6	73.8		0.00284722	89
	0.00626157	56.7	63.5	48.8	35.6	73.9		0.0028588	89
	0.00627315	56.5	63.6	48.8	35.6	73.8		0.0028588	89
	0.00628472	55.4	63.6	48.9	35.6	73.7		0.00287037	90
	0.0062963	56.5	63.6	48.9	35.6	73.8		0.00287037	90
	0.00630787	56.8	63.6	48.8	35.6	73.7		0.00288194	89
	0.00631944	55.5	63.7	48.9	35.6	73.6		0.00288194	89
	0.00633102	55.9	63.6	48.9	35.6	73.7		0.00289352	88
	0.00634259	56.6	63.6	48.8	35.6	74		0.00289352	88
	0.00635417	56.4	63.6	48.8	35.6	73.9		0.00290509	88
	0.00637731	55.3	63.6	48.9	35.6	73.9		0.00290509	88
	0.00638889	56.3	63.6	48.9	35.6	74.1		0.00291667	89
	0.00640046	56.6	63.6	48.8	35.6	74.2		0.00291667	89
	0.00641204	55.3	63.6	48.9	35.6	73.9		0.00292824	89
	0.00642361	55.9	63.6	48.9	35.6	74		0.00292824	89
	0.00643519	56.5	63.7	48.9	35.6	74.1		0.00293981	89
	0.00644676	56.2	63.7	48.8	35.6	74		0.00293981	89
	0.00645833	55.1	63.8	48.9	35.6	73.8		0.00295139	89
	0.00646991	56.2	63.7	48.9	35.6	74		0.00295139	89
	0.00648148	56.6	63.8	48.8	35.6	73.9		0.00296296	89
	0.00649306	55.2	63.8	48.9	35.6	73.8		0.00296296	89
	0.00650463	55.9	63.9	48.9	35.6	73.8		0.00297454	89
	0.00652778	56.6	63.9	48.9	35.6	74		0.00297454	89
	0.00653935	56.2	63.9	48.9	35.6	73.9		0.00298611	89
	0.00655093	55.2	64	48.9	35.6	73.8		0.00298611	89
	0.0065625	56.4	64	48.9	35.6	74		0.00299769	89
	0.00657407	56.7	64.1	48.9	35.6	73.9		0.00299769	89
	0.00658565	55.6	64.1	48.9	35.6	73.9		0.00300926	89
	0.00659722	55.8	64.1	49	35.6	73.8		0.00300926	89
	0.0066088	56.6	64.1	48.9	35.6	73.9		0.00302083	89
	0.00662037	56.7	64.2	48.9	35.6	73.9		0.00302083	89
	0.00663194	55.3	64.3	48.9	35.6	73.7		0.00303241	89
	0.00664352	56.5	64.3	49	35.6	73.7		0.00303241	89
	0.00665509	56.9	64.4	48.9	35.7	73.7		0.00304398	89
	0.00666667	56.1	64.4	48.9	35.6	73.6		0.00304398	89
	0.00667824	55.7	64.5	49	35.7	73.5		0.00305556	88
	0.00668981	56.9	64.5	49	35.7	73.6		0.00305556	88
	0.00670139	56.6	64.6	48.9	35.7	73.4		0.00306713	88
	0.00672454	55.8	64.6	49	35.7	73.3		0.00306713	88
	0.00673611	56.8	64.6	49	35.7	73.5		0.0030787	89
	0.00674769	57	64.6	48.9	35.7	73.6		0.0030787	89
	0.00675926	55.4	64.6	49	35.6	73.5		0.00309028	90
	0.00677083	56.3	64.6	49	35.6	73.7		0.00309028	90
	0.00678241	56.9	64.6	49	35.7	73.8		0.00310185	88
	0.00679398	56.6	64.6	48.9	35.6	73.8		0.00310185	88
	0.00680556	55.4	64.6	49	35.6	73.7		0.00311343	88
	0.00681713	56.6	64.6	49	35.6	73.9		0.00311343	88
	0.0068287	56.9	64.6	48.9	35.6	74		0.003125	89
	0.00684028	55.8	64.6	49	35.6	73.8		0.003125	89
	0.00685185	55.9	64.5	49	35.6	73.8		0.00313657	89
	0.00686343	56.6	64.5	49	35.6	74		0.00313657	89
	0.006875	56.6	64.5	48.9	35.6	74.1		0.00314815	88
	0.00688657	55.1	64.5	49	35.6	73.9		0.00314815	88
	0.00689815	56.2	64.5	49	35.6	74.1		0.00315972	88
	0.0069213	56.5	64.3	48.9	35.6	73		0.00315972	88
	0.00693287	54.4	63.7	48.6	35.5	71.2		0.0031713	89
	0.00694444	52.7	63	48.6	35.5	70.1		0.0031713	89
	0.00695602	53.6	62.2	48.5	35.4	69.7		0.00318287	89
	0.00696759	53.7	61.6	48.3	35.4	69.2		0.00318287	89
	0.00697917	52	60.8	48.2	35.3	68.5		0.00319444	88
	0.00699074	52.7	60.2	48.2	35.3	68.3		0.00319444	88
	0.00700231	53.2	59.6	48	35.3	68		0.00320602	93
	0.00701389	53.1	59.1	47.9	35.3	67.6		0.00320602	93
	0.00702546	52	58.6	47.8	35.3	67.1		0.00321759	97
	0.00703704	52.8	58.1	47.7	35.3	66.9		0.00321759	97
	0.00704861	53.1	57.6	47.5	35.3	66.7		0.00322917	94
	0.00706019	52.6	57.2	47.4	35.3	66.3		0.00322917	94
	0.00707176	52.2	56.7	47.4	35.4	65.9		0.00324074	97
	0.00708333	52.6	56.4	47.2	35.4	65.7		0.00324074	97
	0.00709491	52.7	56	47.1	35.4	65.4		0.00325231	94
	0.00710648	51.7	55.5	47	35.4	64.8		0.00325231	94
	0.00711806	52.1	55.2	46.9	35.5	64.7		0.00326389	92
	0.00712963	52.2	54.8	46.7	35.5	64.5		0.00326389	92
	0.0071412	51.9	54.5	46.6	35.6	64.1		0.00327546	92
	0.00715278	51.3	54.2	46.6	35.6	63.7		0.00327546	92
	0.00716435	51.6	53.8	46.4	35.6	63.5		0.00328704	92
	0.00717593	51.6	53.5	46.2	35.7	63.2		0.00328704	92
	0.0071875	50.8	53.2	46.2	35.6	62.8		0.00329861	92
	0.00721065	50.9	52.9	46.1	35.7	62.5		0.00329861	92
	0.00722222	51	52.6	45.9	35.7	62.3		0.00331019	92
	0.0072338	50.7	52.4	45.8	35.7	62		0.00331019	92
	0.00724537	50.2	52	45.7	35.8	61.6		0.00332176	92
	0.00725694	50.3	51.7	45.5	35.8	61.4		0.00332176	92
	0.00726852	50.2	51.5	45.4	35.9	61.2		0.00333333	93
	0.00728009	49.5	51.2	45.3	35.9	60.7		0.00333333	93
	0.00729167	49.6	50.9	45.2	35.9	60.5		0.00334491	97
	0.00730324	49.6	50.7	45.1	36	60.3		0.00334491	97
	0.00731481	49.3	50.5	45	35.9	60		0.00335648	93
	0.00732639	48.9	50.2	44.9	36	59.7		0.00335648	93
	0.00734954	49	49.9	44.7	36	59.5		0.00336806	92
	0.00736111	48.9	49.8	44.6	36	59.3		0.00336806	92
	0.00737269	48.4	49.6	44.6	36	59		0.00337963	92
	0.00738426	48.3	49.3	44.5	36.1	58.8		0.00337963	92
	0.00739583	48.3	49.1	44.4	36.1	58.6		0.0033912	92
	0.00740741	48.2	49	44.2	36.1	58.4		0.0033912	92
	0.00741898	47.7	48.7	44.1	36.1	58		0.00340278	91
	0.00743056	47.7	48.4	44	36.1	57.9		0.00340278	91
	0.00744213	47.6	48.2	43.9	36.2	57.7		0.00341435	91
	0.0074537	47.2	48.1	43.9	36.2	57.3		0.00341435	91
	0.00746528	47.2	47.9	43.8	36.2	57.2		0.00342593	91
	0.00747685	47.1	47.7	43.6	36.2	57		0.00342593	91
	0.00748843	46.8	47.5	43.6	36.2	56.7		0.0034375	91
	0.0075	46.6	47.3	43.5	36.2	56.5		0.0034375	91
	0.00752315	46.6	47.1	43.4	36.2	56.4		0.00344907	90
	0.00753472	46.5	46.9	43.3	36.3	56.2		0.00344907	90
	0.0075463	46.1	46.7	43.2	36.3	55.9		0.00346065	91
	0.00755787	46.2	46.7	43.1	36.3	55.8		0.00346065	91
	0.00756944	46.1	46.5	43	36.3	55.6		0.00347222	96
	0.00758102	45.8	46.3	42.9	36.3	55.3		0.00347222	96
	0.00759259	45.7	46.2	42.9	36.3	55.1		0.0034838	96
	0.00760417	45.7	46	42.8	36.4	55		0.0034838	96
	0.00761574	45.6	45.9	42.6	36.4	54.9		0.00349537	92
	0.00762731	45.2	45.7	42.6	36.3	54.5		0.00349537	92
	0.00763889	45.2	45.6	42.5	36.3	54.4		0.00350694	92
	0.00766204	45.2	45.4	42.4	36.4	54.3		0.00350694	92
	0.00768519	44.8	45.1	42.3	36.4	53.9		0.00351852	91
	0.00769676	44.8	45	42.2	36.4	53.8		0.00351852	91
	0.00770833	44.7	44.9	42.1	36.4	53.6		0.00353009	91
	0.00771991	44.5	44.7	42	36.4	53.3		0.00353009	91
	0.00773148	44.4	44.6	42	36.4	53.3		0.00354167	91
	0.00774306	44.4	44.5	41.9	36.5	53.2		0.00354167	91
	0.00775463	44.3	44.4	41.9	36.5	53		0.00355324	91
	0.0077662	44.1	44.3	41.8	36.5	52.7		0.00355324	91
	0.00777778	44	44.1	41.7	36.5	52.7		0.00356481	91
	0.00778935	44	44	41.6	36.5	52.6		0.00356481	91
	0.00780093	43.8	43.9	41.6	36.5	52.3		0.00357639	91
	0.0078125	43.7	43.8	41.5	36.5	52.2		0.00357639	91
	0.00782407	43.6	43.7	41.4	36.5	52.1		0.00358796	91
	0.00783565	43.6	43.6	41.4	36.5	51.9		0.00358796	91
	0.00784722	43.4	43.5	41.3	36.5	51.7		0.00359954	91
	0.00787037	43.3	43.4	41.2	36.5	51.6		0.00359954	91
	0.00788194	43.3	43.2	41.1	36.5	51.5		0.00361111	91
	0.00789352	43.2	43.1	41.1	36.5	51.3		0.00361111	91
	0.00790509	43.1	43.1	41.1	36.5	51.1		0.00362269	91
	0.00791667	43	42.9	41	36.5	51.1		0.00362269	91
	0.00792824	43	42.9	40.9	36.5	50.9		0.00363426	91
	0.00793981	42.8	42.8	40.9	36.5	50.7		0.00363426	91
	0.00795139	42.8	42.7	40.8	36.6	50.7		0.00364583	91
	0.00796296	42.7	42.6	40.7	36.5	50.6		0.00364583	91
	0.00797454	42.6	42.5	40.7	36.5	50.4		0.00365741	91
	0.00798611	42.5	42.4	40.7	36.5	50.2		0.00365741	91
	0.00799769	42.5	42.3	40.6	36.5	50.2		0.00366898	90
	0.00800926	42.4	42.3	40.5	36.6	50.1		0.00366898	90
	0.00802083	42.2	42.2	40.5	36.5	49.8		0.00368056	93
	0.00803241	42.2	42	40.4	36.5	49.8		0.00368056	93
	0.00804398	42.1	42	40.4	36.6	49.7		0.00369213	96
	0.00805556	42.1	41.9	40.3	36.6	49.5		0.00369213	96
	0.0080787	42	41.8	40.3	36.6	49.3		0.0037037	97
	0.00809028	41.9	41.7	40.2	36.6	49.3		0.0037037	97
	0.00811343	41.7	41.6	40.1	36.6	49		0.00371528	95
	0.008125	41.7	41.5	40.1	36.6	48.9		0.00371528	95
	0.00814815	41.5	41.3	39.9	36.6	48.5		0.00372685	93
	0.0081713	41.4	41.3	39.9	36.6	48.5		0.00372685	93
	0.00818287	41.4	41.2	39.8	36.6	48.4		0.00373843	92
	0.00819444	41.3	41.1	39.8	36.6	48.2		0.00373843	92
	0.00820602	41.3	41.1	39.7	36.6	48.1		0.00375	92
	0.00821759	41.2	41	39.7	36.6	48.1		0.00375	92
	0.00822917	41.2	40.9	39.7	36.6	48		0.00376157	91
	0.00824074	41	40.9	39.6	36.6	47.8		0.00376157	91
	0.00825231	41	40.8	39.6	36.6	47.8		0.00377315	91
	0.00826389	41	40.8	39.5	36.6	47.7		0.00377315	91
	0.00827546	40.9	40.7	39.5	36.6	47.6		0.00378472	91
	0.00828704	40.9	40.6	39.5	36.6	47.4		0.00378472	91
	0.00831019	40.8	40.6	39.4	36.6	47.4		0.0037963	91
	0.00832176	40.8	40.5	39.4	36.6	47.3		0.0037963	91
	0.00833333	40.7	40.4	39.4	36.6	47.1		0.00380787	91
	0.00834491	40.7	40.4	39.3	36.6	47.1		0.00380787	91
	0.00835648	40.6	40.3	39.2	36.6	47		0.00381944	93
	0.00836806	40.5	40.3	39.2	36.6	46.8		0.00381944	93
	0.00837963	40.5	40.2	39.2	36.6	46.7		0.00383102	91
	0.0083912	40.4	40.2	39.1	36.6	46.7		0.00383102	91
	0.00840278	40.4	40.1	39.1	36.6	46.6		0.00384259	91
	0.00841435	40.3	40	39.1	36.6	46.4		0.00384259	91
	0.00842593	40.3	40	39	36.6	46.4		0.00385417	91
	0.00844907	40.3	40	39	36.6	46.4		0.00385417	91
	0.00846065	40.2	39.9	39	36.6	46.1		0.00386574	91
	0.00847222	40.2	39.9	38.9	36.6	46.1		0.00386574	91
	0.0084838	40.1	39.8	38.9	36.6	46.1		0.00387731	91
	0.00849537	40.1	39.8	38.9	36.6	46		0.00387731	91
	0.00850694	40	39.7	38.8	36.6	45.8		0.00388889	91
	0.00851852	40	39.7	38.8	36.6	45.9		0.00388889	91
	0.00853009	40	39.6	38.7	36.6	45.8		0.00390046	91
	0.00854167	39.9	39.6	38.7	36.6	45.6		0.00390046	91
	0.00855324	39.9	39.6	38.7	36.6	45.5		0.00391204	91
	0.00856481	39.8	39.5	38.6	36.6	45.5		0.00391204	91
	0.00857639	39.8	39.5	38.6	36.6	45.4		0.00392361	91
	0.00858796	39.7	39.5	38.6	36.6	45.3		0.00392361	91
	0.00861111	39.7	39.4	38.6	36.6	45.3		0.00393519	91
	0.00862269	39.6	39.3	38.5	36.6	45.1		0.00393519	91
	0.00863426	39.6	39.3	38.5	36.6	45		0.00394676	90
	0.00865741	39.5	39.2	38.5	36.6	45		0.00394676	90
	0.00866898	39.5	39.2	38.4	36.6	44.9		0.00395833	90
	0.00868056	39.5	39.2	38.4	36.6	44.7		0.00395833	90
	0.00869213	39.4	39.1	38.4	36.6	44.8		0.00396991	90
	0.0087037	39.4	39.1	38.3	36.6	44.7		0.00396991	90
	0.00871528	39.4	39.1	38.3	36.6	44.6		0.00398148	91
	0.00872685	39.3	39	38.3	36.6	44.5		0.00398148	91
	0.00873843	39.3	39	38.3	36.6	44.5		0.00399306	90
	0.00876157	39.2	38.9	38.2	36.6	44.3		0.00399306	90
	0.00877315	39.2	38.9	38.2	36.6	44.3		0.00400463	90
	0.00878472	39.2	38.8	38.2	36.6	44.3		0.00400463	90
	0.00880787	39.1	38.8	38.1	36.6	44		0.0040162	90
	0.00881944	39.1	38.7	38.1	36.6	44.1		0.0040162	90
	0.00883102	39.1	38.7	38.1	36.6	44.1		0.00402778	91
	0.00884259	39	38.7	38.1	36.6	43.9		0.00402778	91
	0.00885417	39	38.7	38.1	36.6	43.8		0.00403935	91
	0.00886574	39	38.7	38	36.6	43.8		0.00403935	91
	0.00887731	38.9	38.6	38	36.6	43.8		0.00405093	90
	0.00888889	38.9	38.6	38	36.6	43.6		0.00405093	90
	0.00890046	38.9	38.6	38	36.6	43.6		0.0040625	90
	0.00891204	38.9	38.5	38	36.6	43.6		0.0040625	90
	0.00892361	38.8	38.6	37.9	36.6	43.5		0.00407407	91
	0.00893519	38.8	38.5	37.9	36.6	43.4		0.00407407	91
	0.00895833	38.8	38.4	37.9	36.6	43.4		0.00408565	91
	0.00896991	38.7	38.4	37.9	36.6	43.3		0.00408565	91
	0.00898148	38.7	38.4	37.9	36.6	43.2		0.00409722	90
	0.00899306	38.7	38.4	37.8	36.6	43.2		0.00409722	90
	0.00900463	38.7	38.4	37.8	36.6	43.2		0.0041088	90
	0.0090162	38.7	38.4	37.8	36.6	43.1		0.0041088	90
	0.00902778	38.6	38.3	37.7	36.6	43		0.00412037	91
	0.00903935	38.6	38.3	37.8	36.6	43		0.00412037	91
	0.00905093	38.6	38.3	37.7	36.6	43		0.00413194	91
	0.0090625	38.5	38.2	37.7	36.6	42.8		0.00413194	91
	0.00907407	38.5	38.2	37.7	36.6	42.8		0.00414352	90
	0.00908565	38.5	38.2	37.7	36.6	42.8		0.00414352	90
	0.00909722	38.5	38.2	37.6	36.6	42.7		0.00415509	90
	0.0091088	38.5	38.1	37.7	36.6	42.6		0.00415509	90
	0.00913194	38.4	38.1	37.6	36.6	42.6		0.00416667	90
	0.00914352	38.4	38.1	37.6	36.6	42.6		0.00416667	90
	0.00915509	38.4	38.1	37.6	36.6	42.4		0.00417824	90
	0.00916667	38.4	38.1	37.5	36.6	42.5		0.00417824	90
	0.00917824	38.3	38.1	37.5	36.6	42.5		0.00418981	90
	0.00918981	38.3	38	37.5	36.6	42.3		0.00418981	90
	0.00920139	38.3	38	37.5	36.6	42.2		0.00420139	90
	0.00921296	38.3	37.9	37.5	36.6	42.3		0.00420139	90
	0.00922454	38.3	38	37.5	36.6	42.3		0.00421296	90
	0.00923611	38.2	37.9	37.5	36.6	42.1		0.00421296	90
	0.00924769	38.2	37.9	37.5	36.6	42.1		0.00422454	90
	0.00925926	38.2	37.9	37.4	36.6	42.1		0.00422454	90
	0.00927083	38.2	37.9	37.4	36.6	42		0.00423611	90
	0.00928241	38.1	37.8	37.4	36.6	41.9		0.00423611	90
	0.00929398	38.1	37.8	37.4	36.6	41.9		0.00424769	90
	0.00930556	38.1	37.8	37.4	36.5	41.9		0.00424769	90
	0.00931713	38.1	37.8	37.4	36.6	41.8		0.00425926	90
	0.0093287	38.1	37.8	37.3	36.6	41.8		0.00425926	90
	0.00934028	38.1	37.8	37.3	36.6	41.8		0.00427083	90
	0.00935185	38.1	37.8	37.3	36.6	41.8		0.00427083	90
	0.009375	38	37.8	37.3	36.6	41.6		0.00428241	91
	0.00938657	38	37.7	37.3	36.6	41.6		0.00428241	91
	0.00939815	38	37.7	37.2	36.5	41.6		0.00429398	91
	0.00940972	38	37.7	37.3	36.6	41.5		0.00429398	91
	0.0094213	37.9	37.7	37.2	36.5	41.5		0.00430556	90
	0.00943287	37.9	37.6	37.3	36.5	41.5		0.00430556	90
	0.00944444	37.9	37.7	37.2	36.5	41.4		0.00431713	90
	0.00945602	37.9	37.6	37.2	36.6	41.3		0.00431713	90
	0.00947917	37.9	37.6	37.2	36.5	41.4		0.0043287	90
	0.00949074	37.9	37.6	37.2	36.6	41.3		0.0043287	90
	0.00950231	37.8	37.6	37.2	36.5	41.2		0.00434028	90
	0.00951389	37.8	37.5	37.1	36.5	41.2		0.00434028	90
	0.00952546	37.8	37.5	37.1	36.5	41.2		0.00435185	90
	0.00953704	37.8	37.5	37.2	36.5	41.1		0.00435185	90
	0.00954861	37.8	37.5	37.1	36.5	41.2		0.00436343	89
	0.00956019	37.8	37.4	37.1	36.6	41.3		0.00436343	89
	0.00957176	37.8	37.4	37.1	36.5	41.3		0.004375	90
	0.00958333	37.7	37.4	37.1	36.6	41.3		0.004375	90
	0.00959491	37.7	37.4	37.1	36.5	41.2		0.00438657	90
	0.00960648	37.7	37.4	37.1	36.5	41.1		0.00438657	90
	0.00961806	37.7	37.4	37	36.5	40.9		0.00439815	90
	0.00962963	37.7	37.4	37	36.5	40.8		0.00439815	90
	0.00965278	37.6	37.4	37.1	36.5	40.6		0.00440972	89
	0.00966435	37.7	37.4	37	36.5	40.6		0.00440972	89
	0.00967593	37.6	37.4	37	36.5	40.5		0.0044213	90
	0.0096875	37.6	37.4	37	36.5	40.4		0.0044213	90
	0.00969907	37.6	37.3	37	36.5	40.4		0.00443287	91
	0.00971065	37.6	37.3	37	36.5	40.4		0.00443287	91
	0.00972222	37.6	37.3	37	36.6	40.4		0.00444444	90
	0.0097338	37.5	37.3	37	36.5	40.4		0.00444444	90
	0.00974537	37.5	37.3	37	36.5	40.5		0.00445602	90
	0.00975694	37.5	37.3	37	36.5	40.6		0.00445602	90
	0.00976852	37.5	37.3	36.9	36.5	40.6		0.00446759	90
	0.00978009	37.5	37.3	36.9	36.5	40.6		0.00446759	90
	0.00979167	37.5	37.3	36.9	36.5	40.7		0.00447917	90
	0.00980324	37.5	37.2	36.9	36.5	40.7		0.00447917	90
	0.00981481	37.5	37.2	36.9	36.5	40.6		0.00449074	90
	0.00982639	37.5	37.3	36.9	36.5	40.6		0.00449074	90
	0.00983796	37.5	37.2	36.9	36.5	40.6		0.00450231	90
	0.00984954	37.5	37.2	36.9	36.5	40.6		0.00450231	90
	0.00986111	37.5	37.2	36.8	36.5	40.5		0.00451389	90
	0.00987269	37.5	37.2	36.8	36.5	40.5		0.00451389	90
	0.00989583	37.4	37.2	36.9	36.5	40.5		0.00452546	90
	0.00990741	37.4	37.1	36.8	36.5	40.4		0.00452546	90
	0.00991898	37.4	37.1	36.8	36.5	40.4		0.00453704	90
	0.00993056	37.4	37.1	36.8	36.5	40.4		0.00453704	90
	0.00994213	37.4	37.1	36.8	36.5	40.3		0.00454861	90
	0.0099537	37.4	37.1	36.8	36.5	40.3		0.00454861	90
	0.00996528	37.4	37.1	36.8	36.5	40.3		0.00456019	90
	0.00997685	37.4	37.1	36.8	36.5	40.3		0.00456019	90
	0.00998843	37.4	37.1	36.8	36.5	40.3		0.00457176	90
	0.01	37.4	37.1	36.8	36.5	40.2		0.00457176	90
	0.0100116	37.3	37	36.7	36.5	40.2		0.00458333	90
	0.0100231	37.3	37	36.8	36.5	40.2		0.00458333	90
	0.0100347	37.3	37	36.8	36.5	40		0.00459491	90
	0.0100463	37.3	37	36.8	36.5	39.7		0.00459491	90
	0.0100579	37.3	37	36.8	36.5	39.6		0.00460648	90
	0.0100694	37.2	37	36.8	36.5	39.7		0.00460648	90
	0.0100926	37.3	37	36.7	36.5	39.7		0.00461806	89
	0.0101042	37.3	37	36.8	36.5	39.6		0.00461806	89
	0.0101157	37.2	37	36.8	36.5	39.6		0.00462963	90
	0.0101273	37.2	36.9	36.7	36.5	39.7		0.00462963	90
	0.0101389	37.2	36.9	36.7	36.5	39.6		0.0046412	90
	0.0101505	37.2	36.9	36.7	36.5	39.4		0.0046412	90
	0.010162	37.2	36.9	36.7	36.5	39.6		0.00465278	90
	0.0101736	37.2	36.9	36.7	36.5	39.6		0.00465278	90
	0.0101852	37.2	36.9	36.7	36.5	39.4		0.00466435	90
	0.0101968	37.2	36.9	36.7	36.5	39.4		0.00466435	90
	0.0102083	37.2	36.9	36.7	36.5	39.5		0.00467593	90
	0.0102199	37.1	36.9	36.7	36.5	39.4		0.00467593	90
	0.0102315	37.2	36.9	36.7	36.5	39.3		0.0046875	90
	0.0102431	37.1	36.9	36.7	36.5	39.4		0.0046875	90
	0.0102662	37.1	36.9	36.6	36.5	39.3		0.00469907	90
	0.0102778	37.1	36.8	36.6	36.5	39.2		0.00469907	90
	0.0102894	37.1	36.8	36.7	36.5	39.2		0.00471065	90
	0.0103009	37.1	36.9	36.6	36.5	39.3		0.00471065	90
	0.0103125	37.1	36.8	36.6	36.5	39.2		0.00472222	91
	0.0103241	37.1	36.8	36.6	36.5	39.1		0.00472222	91
	0.0103356	37.1	36.9	36.6	36.5	39.2		0.0047338	91
	0.0103472	37	36.8	36.6	36.5	39.2		0.0047338	91
	0.0103588	37.1	36.8	36.6	36.5	39.1		0.00474537	90
	0.0103704	37.1	36.8	36.6	36.4	39.1		0.00474537	90
	0.0103819	37.1	36.8	36.6	36.5	39.1		0.00475694	90
	0.0103935	37.1	36.8	36.6	36.5	39.1		0.00475694	90
	0.0104051	37	36.8	36.6	36.5	39		0.00476852	90
	0.0104282	37	36.8	36.6	36.5	39		0.00476852	90
	0.0104398	37	36.7	36.6	36.5	39		0.00478009	91
	0.0104514	37	36.8	36.5	36.4	38.9		0.00478009	91
	0.010463	37	36.7	36.6	36.4	38.9		0.00479167	90
	0.0104745	37	36.8	36.6	36.5	39		0.00479167	90
	0.0104861	37	36.7	36.6	36.5	38.9		0.00480324	90
	0.0104977	37	36.8	36.5	36.5	38.8		0.00480324	90
	0.0105093	37	36.7	36.5	36.5	38.9		0.00481481	90
	0.0105208	37	36.7	36.5	36.5	38.9		0.00481481	90
	0.0105324	37	36.7	36.5	36.4	38.7		0.00482639	90
	0.010544	37	36.7	36.5	36.5	38.8		0.00482639	90
	0.0105556	37	36.7	36.5	36.5	38.8		0.00483796	90
	0.0105787	37	36.7	36.5	36.4	38.7		0.00483796	90
	0.0105903	37	36.7	36.5	36.5	38.7		0.00484954	90
	0.0106019	36.9	36.7	36.5	36.4	38.7		0.00484954	90
	0.0106134	36.9	36.7	36.5	36.5	38.7		0.00486111	90
	0.010625	36.9	36.7	36.5	36.5	38.6		0.00486111	90
	0.0106366	36.9	36.7	36.5	36.5	38.7		0.00487269	90
	0.0106481	36.9	36.7	36.5	36.5	38.7		0.00487269	90
	0.0106713	36.9	36.7	36.5	36.5	38.6		0.00488426	90
	0.0106829	36.9	36.6	36.5	36.4	38.6		0.00488426	90
	0.0106944	36.9	36.6	36.5	36.5	38.6		0.00489583	90
	0.010706	36.9	36.6	36.5	36.4	38.6		0.00489583	90
	0.0107176	36.9	36.6	36.5	36.4	38.5		0.00490741	90
	0.0107292	36.9	36.6	36.4	36.5	38.5		0.00490741	90
	0.0107407	36.9	36.6	36.4	36.4	38.5		0.00491898	90
	0.0107523	36.9	36.6	36.5	36.4	38.5		0.00491898	90
	0.0107639	36.9	36.6	36.4	36.4	38.5		0.00493056	90
	0.0107755	36.9	36.6	36.5	36.4	38.5		0.00493056	90
	0.010787	36.9	36.6	36.4	36.4	38.4		0.00494213	90
	0.0107986	36.8	36.6	36.4	36.4	38.4		0.00494213	90
	0.0108218	36.8	36.6	36.5	36.4	38.4		0.0049537	90
	0.0108333	36.8	36.6	36.4	36.4	38.4		0.0049537	90
	0.0108449	36.8	36.6	36.4	36.5	38.3		0.00496528	90
	0.0108565	36.8	36.6	36.4	36.4	38.3		0.00496528	90
	0.0108681	36.8	36.6	36.4	36.4	38.4		0.00497685	90
	0.0108796	36.8	36.6	36.4	36.4	38.3		0.00497685	90
	0.0108912	36.8	36.5	36.4	36.4	38.3		0.00498843	90
	0.0109028	36.8	36.5	36.4	36.4	38.3		0.00498843	90
	0.0109144	36.8	36.6	36.4	36.4	38.3		0.005	90
	0.0109259	36.8	36.5	36.4	36.4	38.2		0.005	90
	0.0109375	36.8	36.5	36.4	36.4	38.2		0.00501157	90
	0.0109491	36.8	36.5	36.4	36.5	38.3		0.00501157	90
	0.0109606	36.8	36.6	36.4	36.4	38.2		0.00502315	90
	0.0109722	36.8	36.5	36.4	36.5	38.2		0.00502315	90
	0.0109838	36.8	36.5	36.4	36.4	38.2		0.00503472	91
	0.0109954	36.8	36.5	36.4	36.4	38.2		0.00503472	91
	0.0110069	36.8	36.5	36.4	36.4	38.1		0.0050463	91
	0.0110185	36.8	36.5	36.4	36.4	38.1		0.0050463	91
	0.0110301	36.7	36.5	36.4	36.4	38.1		0.00505787	90
	0.0110417	36.8	36.5	36.4	36.4	38.1		0.00505787	90
	0.0110532	36.8	36.5	36.4	36.4	38		0.00506944	90
	0.0110648	36.7	36.5	36.4	36.4	38.1		0.00506944	90
	0.011088	36.7	36.5	36.4	36.4	38.1		0.00508102	90
	0.0110995	36.8	36.5	36.4	36.4	38		0.00508102	90
	0.0111111	36.7	36.5	36.4	36.4	38		0.00509259	90
	0.0111227	36.7	36.5	36.3	36.4	38		0.00509259	90
	0.0111343	36.7	36.5	36.4	36.4	38		0.00510417	90
	0.0111458	36.7	36.5	36.4	36.4	37.9		0.00510417	90
	0.0111574	36.7	36.5	36.4	36.4	38		0.00511574	90
	0.011169	36.7	36.5	36.4	36.4	38		0.00511574	90
	0.0111806	36.7	36.5	36.4	36.4	37.9		0.00512731	90
	0.0111921	36.7	36.5	36.4	36.4	37.9		0.00512731	90
	0.0112037	36.7	36.5	36.3	36.4	37.9		0.00513889	90
	0.0112153	36.7	36.5	36.3	36.4	37.9		0.00513889	90
	0.0112269	36.7	36.5	36.4	36.4	37.9		0.00515046	89
	0.0112384	36.7	36.4	36.4	36.4	37.8		0.00515046	89
	0.0112616	36.7	36.4	36.3	36.4	37.9		0.00516204	90
	0.0112731	36.7	36.4	36.3	36.4	37.8		0.00516204	90
	0.0112847	36.7	36.5	36.3	36.4	37.8		0.00517361	90
	0.0113079	36.7	36.4	36.3	36.4	37.8		0.00517361	90
	0.0113194	36.7	36.4	36.3	36.4	37.8		0.00518519	90
	0.011331	36.7	36.5	36.3	36.4	37.8		0.00518519	90
	0.0113426	36.7	36.4	36.3	36.4	37.8		0.00519676	90
	0.0113542	36.7	36.4	36.3	36.4	37.8		0.00519676	90
	0.0113657	36.7	36.4	36.3	36.4	37.7		0.00520833	90
	0.0113773	36.7	36.4	36.3	36.4	37.8		0.00520833	90
	0.0113889	36.7	36.4	36.3	36.4	37.7		0.00521991	89
	0.0114005	36.7	36.4	36.3	36.4	37.7		0.00521991	89
	0.011412	36.7	36.4	36.3	36.4	37.7		0.00523148	90
	0.0114236	36.7	36.4	36.3	36.4	37.7		0.00523148	90
	0.0114352	36.6	36.4	36.3	36.4	37.7		0.00524306	90
	0.0114583	36.6	36.4	36.3	36.4	37.6		0.00524306	90
	0.0114699	36.6	36.4	36.3	36.4	37.7		0.00525463	90
	0.0114815	36.6	36.4	36.3	36.4	37.7		0.00525463	90
	0.0114931	36.6	36.4	36.3	36.4	37.6		0.0052662	91
	0.0115046	36.6	36.4	36.3	36.4	37.6		0.0052662	91
	0.0115162	36.6	36.4	36.3	36.4	37.6		0.00527778	90
	0.0115278	36.6	36.4	36.3	36.4	37.6		0.00527778	90
	0.0115394	36.6	36.4	36.3	36.4	37.6		0.00528935	91
	0.0115509	36.6	36.4	36.3	36.4	37.6		0.00528935	91
	0.0115625	36.6	36.4	36.3	36.4	37.6		0.00530093	90
	0.0115741	36.6	36.4	36.3	36.4	37.5		0.00530093	90
	0.0115856	36.6	36.4	36.3	36.4	37.5		0.0053125	89
	0.0115972	36.6	36.4	36.3	36.4	37.5		0.0053125	89
	0.0116088	36.6	36.4	36.3	36.4	37.5		0.00532407	90
	0.0116204	36.6	36.4	36.3	36.4	37.5		0.00532407	90
	0.0116319	36.6	36.4	36.3	36.4	37.5		0.00533565	91
	0.0116435	36.6	36.3	36.3	36.4	37.5		0.00533565	91
	0.0116551	36.6	36.4	36.2	36.4	37.5		0.00534722	90
	0.0116667	36.6	36.4	36.3	36.4	37.4		0.00534722	90
	0.0116782	36.6	36.4	36.3	36.4	37.5		0.0053588	90
	0.0116898	36.6	36.4	36.2	36.4	37.5		0.0053588	90
	0.0117014	36.6	36.3	36.2	36.4	37.4		0.00537037	90
	0.011713	36.6	36.4	36.2	36.4	37.4		0.00537037	90
	0.0117361	36.6	36.3	36.3	36.4	37.4		0.00538194	90
	0.0117477	36.6	36.3	36.2	36.4	37.4		0.00538194	90
	0.0117593	36.6	36.3	36.2	36.4	37.4		0.00539352	90
	0.0117708	36.6	36.3	36.2	36.4	37.4		0.00539352	90
	0.0117824	36.6	36.3	36.2	36.4	37.4		0.00540509	90
	0.011794	36.6	36.3	36.2	36.4	37.3		0.00540509	90
	0.0118056	36.6	36.3	36.3	36.4	37.4		0.00541667	90
	0.0118171	36.6	36.3	36.2	36.4	37.4		0.00541667	90
	0.0118287	36.6	36.3	36.2	36.4	37.3		0.00542824	90
	0.0118519	36.6	36.3	36.2	36.4	37.3		0.00542824	90
	0.0118634	36.6	36.3	36.2	36.4	37.3		0.00543981	90
	0.011875	36.6	36.3	36.2	36.4	37.4		0.00543981	90
	0.0118866	36.6	36.3	36.2	36.4	37.3		0.00545139	90
	0.0118981	36.5	36.3	36.2	36.4	37.3		0.00545139	90
	0.0119097	36.6	36.3	36.2	36.4	37.3		0.00546296	90
	0.0119213	36.6	36.3	36.2	36.4	37.3		0.00546296	90
	0.0119329	36.6	36.3	36.2	36.4	37.2		0.00547454	90
	0.0119444	36.6	36.3	36.2	36.4	37.3		0.00547454	90
	0.011956	36.5	36.3	36.2	36.4	37.3		0.00548611	90
	0.0119676	36.5	36.3	36.2	36.4	37.2		0.00548611	90
	0.0119792	36.5	36.3	36.2	36.4	37.2		0.00549769	91
	0.0119907	36.5	36.3	36.2	36.4	37.3		0.00549769	91
	0.0120023	36.5	36.3	36.2	36.4	37.2		0.00550926	90
	0.0120139	36.5	36.3	36.2	36.4	37.2		0.00550926	90
	0.0120255	36.5	36.3	36.2	36.4	37.2		0.00552083	91
	0.012037	36.5	36.3	36.2	36.4	37.2		0.00552083	91
	0.0120602	36.5	36.3	36.2	36.4	37.2		0.00553241	90
	0.0120718	36.5	36.3	36.2	36.4	37.2		0.00553241	90
	0.0120833	36.5	36.3	36.2	36.4	37.2		0.00554398	90
	0.0120949	36.5	36.3	36.2	36.4	37.2		0.00554398	90
	0.0121065	36.5	36.3	36.2	36.4	37.1		0.00555556	92
	0.0121181	36.5	36.2	36.2	36.4	37.2		0.00555556	92
	0.0121296	36.5	36.3	36.2	36.4	37.2		0.00556713	89
	0.0121412	36.5	36.3	36.2	36.4	37.1		0.00556713	89
	0.0121528	36.5	36.2	36.2	36.4	37.1		0.0055787	90
	0.0121644	36.5	36.3	36.2	36.4	37.2		0.0055787	90
	0.0121759	36.5	36.3	36.2	36.4	37.1		0.00559028	87
	0.0121875	36.5	36.3	36.2	36.4	37.1		0.00559028	87
	0.0121991	36.5	36.3	36.2	36.4	37.1		0.00560185	90
	0.0122106	36.5	36.3	36.2	36.4	37.1		0.00560185	90
	0.0122222	36.5	36.2	36.2	36.4	37.1		0.00561343	90
	0.0122338	36.5	36.3	36.2	36.4	37.1		0.00561343	90
	0.0122569	36.5	36.3	36.2	36.4	37.1		0.005625	90
	0.0122685	36.5	36.2	36.2	36.4	37.1		0.005625	90
	0.0122801	36.5	36.3	36.2	36.4	37.1		0.00563657	90
	0.0122917	36.5	36.3	36.2	36.4	37		0.00563657	90
	0.0123032	36.5	36.2	36.2	36.4	37.1		0.00564815	90
	0.0123148	36.5	36.3	36.2	36.4	37		0.00564815	90
	0.0123264	36.5	36.2	36.2	36.4	37		0.00565972	90
	0.012338	36.5	36.3	36.2	36.4	37		0.00565972	90
	0.0123495	36.5	36.2	36.2	36.3	37		0.0056713	89
	0.0123611	36.5	36.2	36.2	36.4	37		0.0056713	89
	0.0123727	36.5	36.3	36.2	36.4	37		0.00568287	89
	0.0123843	36.5	36.2	36.2	36.4	37		0.00568287	89
	0.0123958	36.5	36.2	36.2	36.4	37		0.00569444	89
	0.0124074	36.5	36.2	36.2	36.4	37		0.00569444	89
	0.0124306	36.5	36.2	36.2	36.4	37		0.00570602	89
	0.0124421	36.5	36.2	36.2	36.4	37		0.00570602	89
	0.0124537	36.5	36.2	36.2	36.4	37		0.00571759	90
	0.0124653	36.5	36.2	36.1	36.4	37		0.00571759	90
	0.0124769	36.5	36.2	36.2	36.4	37		0.00572917	90
	0.0124884	36.5	36.2	36.2	36.4	36.9		0.00572917	90
	0.0125	36.5	36.2	36.2	36.4	36.9		0.00574074	90
	0.0125116	36.5	36.2	36.2	36.4	36.9		0.00574074	90
	0.0125231	36.5	36.2	36.2	36.4	36.9		0.00575231	90
	0.0125347	36.5	36.2	36.2	36.4	36.9		0.00575231	90
	0.0125463	36.4	36.2	36.2	36.4	36.9		0.00576389	91
	0.0125579	36.5	36.2	36.2	36.4	36.9		0.00576389	91
	0.0125694	36.5	36.2	36.2	36.3	36.8		0.00577546	90
	0.012581	36.5	36.2	36.2	36.4	36.8		0.00577546	90
	0.0126042	36.5	36.2	36.2	36.4	36.9		0.00578704	90
	0.0126157	36.5	36.2	36.2	36.4	36.9		0.00578704	90
	0.0126273	36.5	36.2	36.2	36.3	36.9		0.00579861	90
	0.0126389	36.5	36.2	36.2	36.4	36.9		0.00579861	90
	0.0126505	36.5	36.2	36.1	36.4	36.9		0.00581019	90
	0.012662	36.5	36.2	36.2	36.4	36.9		0.00581019	90
	0.0126736	36.5	36.2	36.1	36.4	36.9		0.00582176	90
	0.0126852	36.5	36.2	36.1	36.4	36.9		0.00582176	90
	0.0126968	36.4	36.2	36.2	36.4	36.8		0.00583333	89
	0.0127083	36.5	36.2	36.1	36.4	36.8		0.00583333	89
	0.0127315	36.5	36.2	36.1	36.4	36.9		0.00584491	90
	0.0127431	36.4	36.2	36.1	36.4	36.9		0.00584491	90
	0.0127546	36.4	36.2	36.2	36.4	36.8		0.00585648	90
	0.0127662	36.4	36.2	36.1	36.4	36.8		0.00585648	90
	0.0127778	36.4	36.2	36.2	36.4	36.9		0.00586806	90
	0.0127894	36.4	36.2	36.1	36.4	36.8		0.00586806	90
	0.0128009	36.4	36.2	36.2	36.4	36.8		0.00587963	90
	0.0128125	36.4	36.2	36.1	36.4	36.8		0.00587963	90
	0.0128241	36.4	36.2	36.1	36.4	36.8		0.0058912	90
	0.0128472	36.4	36.2	36.1	36.3	36.8		0.0058912	90
	0.0128588	36.4	36.2	36.1	36.4	36.8		0.00590278	90
	0.0128704	36.4	36.2	36.1	36.4	36.8		0.00590278	90
	0.0128819	36.4	36.2	36.2	36.4	36.8		0.00591435	89
	0.0128935	36.4	36.2	36.1	36.4	36.8		0.00591435	89
	0.0129051	36.5	36.2	36.1	36.4	36.8		0.00592593	90
	0.0129167	36.4	36.2	36.1	36.4	36.8		0.00592593	90
	0.0129282	36.4	36.2	36.1	36.4	36.7		0.0059375	90
	0.0129398	36.4	36.2	36.1	36.4	36.8		0.0059375	90
	0.0129514	36.4	36.2	36.1	36.4	36.8		0.00594907	91
	0.012963	36.4	36.2	36.1	36.4	36.7		0.00594907	91
	0.0129745	36.4	36.2	36.2	36.4	36.7		0.00596065	90
	0.0129861	36.4	36.2	36.2	36.4	36.7		0.00596065	90
	0.0129977	36.4	36.2	36.1	36.4	36.7		0.00597222	90
	0.0130093	36.4	36.2	36.1	36.4	36.7		0.00597222	90
	0.0130208	36.4	36.2	36.1	36.4	36.7		0.0059838	90
	0.0130324	36.4	36.1	36.2	36.4	36.7		0.0059838	90
	0.0130556	36.4	36.1	36.1	36.4	36.7		0.00599537	90
	0.0130671	36.4	36.2	36.1	36.4	36.7		0.00599537	90
	0.0130787	36.4	36.2	36.1	36.4	36.7		0.00600694	89
	0.0130903	36.4	36.2	36.1	36.4	36.7		0.00600694	89
	0.0131019	36.4	36.2	36.1	36.4	36.7		0.00601852	90
	0.0131134	36.4	36.2	36.1	36.4	36.7		0.00601852	90
	0.013125	36.4	36.2	36.1	36.4	36.7		0.00603009	90
	0.0131366	36.4	36.2	36.1	36.4	36.7		0.00603009	90
	0.0131481	36.4	36.1	36.1	36.4	36.7		0.00604167	90
	0.0131597	36.4	36.2	36.1	36.4	36.7		0.00604167	90
	0.0131829	36.4	36.2	36.1	36.4	36.7		0.00605324	89
	0.0131944	36.4	36.1	36.1	36.4	36.7		0.00605324	89
	0.013206	36.4	36.2	36.2	36.4	36.7		0.00606481	89
	0.0132176	36.4	36.2	36.2	36.4	36.7		0.00606481	89
	0.0132292	36.4	36.1	36.2	36.4	36.7		0.00607639	91
	0.0132407	36.4	36.2	36.1	36.4	36.7		0.00607639	91
	0.0132523	36.4	36.2	36.1	36.4	36.7		0.00608796	90
	0.0132639	36.4	36.2	36.1	36.4	36.7		0.00608796	90
	0.0132755	36.4	36.1	36.1	36.4	36.7		0.00609954	90
	0.013287	36.4	36.2	36.1	36.4	36.7		0.00609954	90
	0.0132986	36.4	36.2	36.1	36.4	36.7		0.00611111	90
	0.0133218	36.4	36.2	36.1	36.4	36.7		0.00611111	90
	0.0133333	36.4	36.1	36.1	36.4	36.6		0.00612269	90
	0.0133449	36.4	36.2	36.1	36.4	36.6		0.00612269	90
	0.0133565	36.4	36.2	36.1	36.4	36.6		0.00613426	90
	0.0133681	36.4	36.1	36.1	36.4	36.6		0.00613426	90
	0.0133796	36.4	36.2	36.1	36.4	36.6		0.00614583	90
	0.0133912	36.4	36.2	36.1	36.4	36.6		0.00614583	90
	0.0134028	36.4	36.1	36.1	36.4	36.6		0.00615741	90
	0.0134144	36.4	36.2	36.1	36.4	36.6		0.00615741	90
	0.0134259	36.4	36.2	36.1	36.4	36.6		0.00616898	90
	0.0134375	36.4	36.2	36.1	36.3	36.6		0.00616898	90
	0.0134491	36.4	36.2	36.1	36.4	36.6		0.00618056	89
	0.0134606	36.4	36.1	36.1	36.4	36.6		0.00618056	89
	0.0134722	36.4	36.2	36.1	36.4	36.6		0.00619213	90
	0.0134838	36.4	36.1	36.1	36.4	36.6		0.00619213	90
	0.0134954	36.4	36.2	36.1	36.4	36.6		0.0062037	90
	0.0135069	36.4	36.1	36.1	36.4	36.6		0.0062037	90
	0.0135185	36.4	36.1	36.1	36.4	36.6		0.00621528	90
	0.0135417	36.4	36.2	36.1	36.4	36.6		0.00621528	90
	0.0135532	36.4	36.2	36.1	36.4	36.6		0.00622685	90
	0.0135648	36.4	36.2	36.1	36.4	36.6		0.00622685	90
	0.0135764	36.4	36.1	36.1	36.4	36.6		0.00623843	91
	0.013588	36.4	36.1	36.1	36.4	36.6		0.00623843	91
	0.0135995	36.4	36.1	36.1	36.4	36.6		0.00625	91
	0.0136111	36.4	36.1	36.1	36.4	36.6		0.00625	91
	0.0136227	36.4	36.2	36.1	36.4	36.6		0.00626157	90
	0.0136343	36.4	36.2	36.1	36.4	36.6		0.00626157	90
	0.0136458	36.4	36.1	36.1	36.4	36.6		0.00627315	89
	0.0136574	36.4	36.1	36.1	36.4	36.6		0.00627315	89
	0.013669	36.4	36.2	36.1	36.4	36.6		0.00628472	90
	0.0136806	36.4	36.2	36.1	36.4	36.6		0.00628472	90
	0.0136921	36.4	36.2	36.1	36.4	36.5		0.0062963	90
	0.0137037	36.4	36.1	36.1	36.4	36.5		0.0062963	90
	0.0137153	36.4	36.2	36.1	36.4	36.6		0.00630787	90
	0.0137269	36.4	36.1	36.1	36.4	36.6		0.00630787	90
	0.01375	36.4	36.1	36.1	36.4	36.6		0.00631944	90
	0.0137616	36.4	36.1	36.1	36.4	36.6		0.00631944	90
	0.0137731	36.4	36.2	36.1	36.4	36.5		0.00633102	91
	0.0137847	36.4	36.2	36.1	36.4	36.5		0.00633102	91
	0.0137963	36.4	36.2	36.1	36.4	36.5		0.00634259	91
	0.0138079	36.3	36.2	36.1	36.4	36.6		0.00634259	91
	0.0138194	36.4	36.1	36.1	36.4	36.5		0.00635417	90
	0.013831	36.4	36.1	36.1	36.4	36.5		0.00635417	90
	0.0138426	36.4	36.2	36.1	36.4	36.5		0.00636574	89
	0.0138542	36.4	36.1	36.1	36.4	36.5		0.00636574	89
	0.0138657	36.4	36.1	36.1	36.4	36.5		0.00637731	91
	0.0138773	36.4	36.1	36.1	36.4	36.5		0.00637731	91
	0.0138889	36.3	36.1	36.1	36.4	36.5		0.00638889	91
	0.0139005	36.4	36.1	36.1	36.4	36.5		0.00638889	91
	0.0139236	36.4	36.1	36.1	36.3	36.5		0.00640046	90
	0.0139352	36.4	36.2	36.1	36.4	36.5		0.00640046	90
	0.0139468	36.4	36.1	36.1	36.4	36.5		0.00641204	90
	0.0139583	36.4	36.1	36.1	36.4	36.5		0.00641204	90
	0.0139699	36.4	36.1	36.1	36.4	36.5		0.00642361	90
	0.0139815	36.4	36.2	36.1	36.4	36.5		0.00642361	90
	0.0139931	36.4	36.1	36.1	36.3	36.5		0.00643519	90
	0.0140046	36.4	36.2	36.1	36.4	36.5		0.00643519	90
	0.0140162	36.4	36.1	36.1	36.4	36.5		0.00644676	90
	0.0140278	36.4	36.1	36.1	36.3	36.5		0.00644676	90
	0.0140394	36.4	36.1	36.1	36.4	36.5		0.00645833	90
	0.0140509	36.4	36.1	36.1	36.4	36.5		0.00645833	90
	0.0140625	36.4	36.1	36.1	36.4	36.5		0.00646991	90
	0.0140856	36.4	36.1	36.1	36.4	36.5		0.00646991	90
	0.0140972	36.4	36.2	36.1	36.4	36.5		0.00648148	90
	0.0141088	36.4	36.1	36.1	36.3	36.5		0.00648148	90
	0.0141204	36.4	36.1	36.1	36.3	36.5		0.00649306	89
	0.0141319	36.4	36.1	36.1	36.4	36.5		0.00649306	89
	0.0141435	36.4	36.1	36.1	36.3	36.5		0.00650463	90
	0.0141551	36.4	36.1	36.1	36.4	36.5		0.00650463	90
	0.0141667	36.4	36.2	36.1	36.3	36.5		0.0065162	90
	0.0141782	36.3	36.1	36.1	36.4	36.5		0.0065162	90
	0.0141898	36.4	36.1	36.1	36.4	36.5		0.00652778	90
	0.014213	36.4	36.1	36.1	36.4	36.5		0.00652778	90
	0.0142245	36.4	36.1	36.1	36.4	36.5		0.00653935	89
	0.0142361	36.4	36.1	36.1	36.3	36.4		0.00653935	89
	0.0142477	36.4	36.1	36.1	36.4	36.4		0.00655093	89
	0.0142593	36.4	36.1	36.1	36.3	36.5		0.00655093	89
	0.0142708	36.3	36.1	36.1	36.4	36.4		0.0065625	90
	0.0142824	36.3	36.2	36.1	36.4	36.4		0.0065625	90
	0.014294	36.4	36.1	36.1	36.3	36.4		0.00657407	89
	0.0143171	36.3	36.1	36.1	36.3	36.4		0.00657407	89
	0.0143287	36.4	36.1	36.1	36.4	36.4		0.00658565	89
	0.0143403	36.4	36.1	36.1	36.4	36.5		0.00658565	89
	0.0143519	36.4	36.1	36.1	36.4	36.4		0.00659722	89
	0.014375	36.3	36.1	36.1	36.4	36.4		0.00659722	89
	0.0143866	36.3	36.1	36.1	36.4	36.4		0.0066088	90
	0.0143981	36.4	36.1	36.1	36.3	36.4		0.0066088	90
	0.0144097	36.3	36.1	36.1	36.3	36.4		0.00662037	89
	0.0144213	36.4	36.1	36.1	36.4	36.4		0.00662037	89
	0.0144329	36.4	36.1	36.1	36.4	36.4		0.00663194	90
	0.0144444	36.3	36.1	36.1	36.4	36.4		0.00663194	90
	0.014456	36.4	36.1	36.1	36.3	36.4		0.00664352	90
	0.0144676	36.3	36.1	36.1	36.4	36.4		0.00664352	90
	0.0144792	36.4	36.1	36.1	36.4	36.4		0.00665509	90
	0.0144907	36.4	36.1	36.1	36.4	36.4		0.00665509	90
	0.0145023	36.3	36.1	36.1	36.4	36.4		0.00666667	89
	0.0145139	36.3	36.1	36.1	36.4	36.4		0.00666667	89
	0.0145255	36.4	36.1	36.1	36.3	36.4		0.00667824	90
	0.0145486	36.3	36.1	36.1	36.4	36.4		0.00667824	90
	0.0145602	36.3	36.1	36.1	36.4	36.4		0.00668981	90
	0.0145718	36.4	36.1	36.1	36.3	36.4		0.00668981	90
	0.0145833	36.3	36.1	36.1	36.4	36.4		0.00670139	90
	0.0145949	36.4	36.1	36.1	36.3	36.4		0.00670139	90
	0.0146065	36.3	36.1	36.1	36.3	36.4		0.00671296	89
	0.0146181	36.3	36.1	36.1	36.3	36.4		0.00671296	89
	0.0146296	36.3	36.1	36.1	36.3	36.4		0.00672454	90
	0.0146412	36.3	36.1	36.1	36.3	36.4		0.00672454	90
	0.0146528	36.3	36.1	36.1	36.4	36.4		0.00673611	90
	0.0146644	36.4	36.1	36.1	36.4	36.4		0.00673611	90
	0.0146759	36.3	36.1	36.1	36.4	36.4		0.00674769	90
	0.0146875	36.3	36.1	36.1	36.3	36.4		0.00674769	90
	0.0146991	36.3	36.1	36.1	36.4	36.4		0.00675926	90
	0.0147106	36.4	36.1	36.1	36.3	36.4		0.00675926	90
	0.0147222	36.4	36.1	36.1	36.4	36.4		0.00677083	90
	0.0147338	36.3	36.1	36.1	36.3	36.4		0.00677083	90
	0.0147454	36.3	36.2	36.1	36.3	36.4		0.00678241	90
	0.0147569	36.4	36.1	36.1	36.4	36.4		0.00678241	90
	0.0147685	36.4	36.1	36.1	36.4	36.4		0.00679398	91
	0.0147917	36.4	36.1	36.1	36.3	36.3		0.00679398	91
	0.0148032	36.3	36.1	36.1	36.3	36.3		0.00680556	91
	0.0148148	36.4	36.1	36.1	36.3	36.4		0.00680556	91
	0.0148264	36.3	36.1	36.1	36.3	36.4		0.00681713	91
	0.014838	36.4	36.1	36.1	36.3	36.3		0.00681713	91
	0.0148495	36.3	36.1	36.1	36.4	36.4		0.0068287	90
	0.0148611	36.4	36.1	36.1	36.4	36.3		0.0068287	90
	0.0148727	36.4	36.1	36.1	36.4	36.4		0.00684028	90
	0.0148843	36.4	36.1	36.1	36.3	36.3		0.00684028	90
	0.0149074	36.4	36.1	36.1	36.3	36.4		0.00685185	91
	0.014919	36.4	36.1	36.1	36.3	36.3		0.00685185	91
	0.0149306	36.4	36.1	36.1	36.4	36.3		0.00686343	90
	0.0149421	36.4	36.1	36.1	36.4	36.3		0.00686343	90
	0.0149537	36.4	36.1	36.1	36.3	36.3		0.006875	90
	0.0149653	36.4	36.1	36.1	36.4	36.3		0.006875	90
	0.0149769	36.3	36.1	36.1	36.3	36.3		0.00688657	91
	0.0149884	36.4	36.1	36.1	36.3	36.3		0.00688657	91
	0.015	36.4	36.1	36.1	36.3	36.3		0.00689815	90
	0.0150116	36.4	36.1	36.1	36.3	36.3		0.00689815	90
	0.0150231	36.4	36.1	36.1	36.3	36.3		0.00690972	91
	0.0150347	36.3	36.1	36.1	36.3	36.3		0.00690972	91
	0.0150463	36.3	36.1	36.1	36.3	36.3		0.0069213	90
	0.0150579	36.3	36.1	36.1	36.3	36.3		0.0069213	90
	0.0150694	36.4	36.1	36.1	36.3	36.3		0.00693287	91
	0.015081	36.4	36.1	36.1	36.3	36.3		0.00693287	91
	0.0150926	36.4	36.1	36.1	36.3	36.3		0.00694444	88
	0.0151042	36.4	36.1	36.1	36.3	36.3		0.00694444	88
	0.0151157	36.4	36.1	36.1	36.3	36.3		0.00695602	68
	0.0151273	36.4	36.1	36.1	36.3	36.3		0.00695602	68
	0.0151505	36.4	36.1	36.1	36.3	36.3		0.00696759	62
	0.015162	36.4	36.1	36.1	36.3	36.3		0.00696759	62
	0.0151736	36.3	36.1	36.1	36.3	36.3		0.00697917	59
	0.0151852	36.4	36.1	36.1	36.3	36.3		0.00697917	59
	0.0151968	36.4	36.1	36.1	36.3	36.3		0.00699074	59
	0.0152083	36.4	36.1	36.1	36.3	36.3		0.00699074	59
	0.0152199	36.3	36.1	36.1	36.3	36.3		0.00700231	59
	0.0152315	36.4	36.1	36.1	36.3	36.3		0.00700231	59
	0.0152431	36.4	36.1	36.1	36.3	36.3		0.00701389	59
	0.0152662	36.4	36.1	36.1	36.3	36.3		0.00701389	59
	0.0152778	36.4	36.1	36.1	36.3	36.3		0.00702546	58
	0.0153009	36.4	36.1	36.1	36.3	36.3		0.00702546	58
	0.0153125	36.4	36.1	36.1	36.4	36.3		0.00703704	58
	0.0153241	36.4	36.1	36.1	36.3	36.3		0.00703704	58
	0.0153356	36.4	36.1	36.1	36.3	36.3		0.00704861	58
	0.0153472	36.4	36.1	36.1	36.3	36.3		0.00704861	58
	0.0153588	36.4	36.1	36.1	36.3	36.3		0.00706019	57
	0.0153704	36.4	36.1	36.1	36.3	36.3		0.00706019	57
	0.0153819	36.4	36.1	36.1	36.3	36.3		0.00707176	55
	0.0153935	36.4	36.1	36.1	36.3	36.3		0.00707176	55
	0.0154051	36.4	36.1	36.1	36.3	36.3		0.00708333	55
	0.0154167	36.4	36.1	36.1	36.3	36.3		0.00708333	55
	0.0154282	36.4	36.1	36.1	36.3	36.3		0.00709491	56
	0.0154398	36.4	36.1	36.1	36.3	36.3		0.00709491	56
	0.015463	36.4	36.1	36.1	36.3	36.3		0.00710648	56
	0.0154745	36.4	36.1	36.1	36.3	36.3		0.00710648	56
	0.0154977	36.4	36.1	36.1	36.3	36.3		0.00711806	56
	0.0155093	36.4	36.1	36.1	36.3	36.2		0.00711806	56
	0.0155208	36.4	36.1	36.1	36.3	36.3		0.00712963	56
	0.0155324	36.4	36.1	36.1	36.3	36.3		0.00712963	56
	0.015544	36.4	36.1	36.1	36.3	36.3		0.0071412	57
	0.0155556	36.4	36.1	36.1	36.3	36.3		0.0071412	57
	0.0155671	36.4	36.2	36.1	36.3	36.3		0.00715278	56
								0.00715278	56
								0.00716435	57
								0.00716435	57
								0.00717593	57
								0.00717593	57
								0.0071875	58
								0.0071875	58
								0.00719907	57
								0.00719907	57
								0.00721065	57
								0.00721065	57
								0.00722222	58
								0.00722222	58
								0.0072338	58
								0.0072338	58
								0.00724537	58
								0.00724537	58
								0.00725694	59
								0.00725694	59
								0.00726852	59
								0.00726852	59
								0.00728009	59
								0.00728009	59
								0.00729167	59
								0.00729167	59
								0.00730324	59
								0.00730324	59
								0.00731481	59
								0.00731481	59
								0.00732639	59
								0.00732639	59
								0.00733796	59
								0.00733796	59
								0.00734954	59
								0.00734954	59
								0.00736111	60
								0.00736111	60
								0.00737269	59
								0.00737269	59
								0.00738426	59
								0.00738426	59
								0.00739583	60
								0.00739583	60
								0.00740741	60
								0.00740741	60
								0.00741898	59
								0.00741898	59
								0.00743056	59
								0.00743056	59
								0.00744213	59
								0.00744213	59
								0.0074537	60
								0.0074537	60
								0.00746528	59
								0.00746528	59
								0.00747685	59
								0.00747685	59
								0.00748843	60
								0.00748843	60
								0.0075	59
								0.0075	59
								0.00751157	59
								0.00751157	59
								0.00752315	59
								0.00752315	59
								0.00753472	59
								0.00753472	59
								0.0075463	59
								0.0075463	59
								0.00755787	59
								0.00755787	59
								0.00756944	59
								0.00756944	59
								0.00758102	59
								0.00758102	59
								0.00759259	58
								0.00759259	58
								0.00760417	58
								0.00760417	58
								0.00761574	58
								0.00761574	58
								0.00762731	58
								0.00762731	58
